# Supplementary material for: Community prevalence of chronic respiratory symptoms in rural Malawi: Implications for policy
Source: PLoS One. 2017 Dec 7;12(12):e0188437. doi: 10.1371/journal.pone.0188437 (PMC5720679; doi:10.1371/journal.pone.0188437)
Supplement: S1 Data — This is the Excel spreadsheet that contains the minimal dataset collected in responses to the study questionnaire. (XLSX) [file pone.0188437.s002.xlsx]

## Sheet: Triage2 Plus HHS
Data	start	end	date	deviceid	authuser	facility	cluster	hhid	respid	relation	sex	age	dwelling	mstatus	education	occupation	occupationother	youth	middle	elders	totalpeople	energy	coughb	wheeze	breath	sputum	othersymp	specifysymp	healthpassport	diagtb	diagasthma	diagcopd	diagbronch	diagresptract	tbdrug	inhaler	inhaledcort	salbutamol	aminophylline	antibiotic	otherdrug	specifydrug	healthpic	healthpic1	healthpic2
Data	start	end	today	deviceid	authuser	Facility_Name	Cluster_Name	House_ID	Respondent_ID	Relationship	Sex	Age	Dwelling_Unit	Marital_Status	Qualification	Occupation_HH	Occupation_HH_other	Number_of_People-Youth	Number_of_People-Middle	Number_of_People-Elders	Number_of_People-Total_People	Energy_Source	CAD_TB_SCREEN-CoughB	CAD_TB_SCREEN-Wheeze	CAD_TB_SCREEN-Breath	CAD_TB_SCREEN-Sputum	CAD_TB_SCREEN-Other_Symptoms	Specify_Symptoms	Health_Passport	Diagnoses-Diag_TB	Diagnoses-Diag_Asthma	Diagnoses-Diag_COPD	Diagnoses-Diag_Bronch	Diagnoses-Diag_Resp	Prescription-TB_Drugs	Prescription-Sal_Inhaler	Prescription-Inhaled_Cort	Prescription-Salbutamol	Prescription-Aminophylline	Prescription-Antibiotic	Prescription-Other_Drug	Specify_Drug	Health_Pic	Health_Pic1	Health_Pic2
2	2015-01-30 10:44:27	2015-01-30 16:34:00	2015-01-30	359000000000000	Phonex	Malambo	Vg27	11	1	1	1	50	1	1	2	1		1	2	2	5	3	0	1	1	1	0		1	0	1	1	0	0	0	0	0	1	0	1	0		media\1422608216215.jpg
2	2014-10-31 10:30:36	2014-11-03 18:44:14	2014-10-31	359000000000000	Alex	Chakhaza	Vg40	4	1	1	1	58	1	1	3	1		0	2	2	4	3	0	0	1	0	0		1	0	0	1	0	0	0	0	0	0	0	1	0		media\1414745308105.jpg
2	2014-10-31 10:57:09	2014-11-03 18:43:23	2014-10-31	359000000000000	Alex	Chakhaza	Vg40	4	2	3	2	51	1	1	2	1		0	2	2	4	3	0	0	0	0	0		1	0	0	1	0	0	0	0	0	0	0	1	0		media\1414746318989.jpg
2	2014-10-31 12:19:13	2014-11-03 18:26:52	2014-10-31	359000000000000	Alex	Chakhaza	Vg40	8	1	1	1	50	1	1	3	1		1	4	2	7	3	0	0	0	0	0		1	0	0	1	0	0	0	0	0	0	0	1	0		media\1414751475863.jpg
2	2015-03-04 15:26:11	2015-03-04 17:33:39	2015-03-04	359000000000000	Phonex	Chinkhwiri	Vg64	2	2	3	2	32	1	1	2	3		2	2	0	4	3	0	0	0	0	0		1	0	0	1	0	1	0	0	0	0	0	1	0		media\1425475966076.jpg
2	2014-12-04 13:35:42	2014-12-04 18:22:57	2014-12-04	359000000000000	Alex	Nalunga	Vg69	15	3	5	1	18	1	4	3	1		1	2	2	5	3	0	0	0	1	0		1	0	0	1	0	0	0	0	0	0	0	1	0		media\1417693441378.jpg
2	2014-12-05 14:18:34	2014-12-05 18:53:34	2014-12-05	359000000000000	Alex	Nalunga	Vg96	20	1	1	1	63	1	1	2	1		0	0	2	2	3	0	0	0	0	0		1	0	0	1	0	0	0	0	0	0	0	1	0		media\1417784197243.jpg
2	2014-12-05 14:57:01	2014-12-05 18:53:52	2014-12-05	359000000000000	Alex	Nalunga	Vg96	20	2	3	2	50	1	1	2	1		0	0	2	2	3	0	0	0	1	0		1	0	0	1	0	0	0	0	0	0	0	1	0		media\1417784507851.jpg
2	2014-10-06 14:14:13	2014-10-06 18:36:20	2014-10-06	359000000000000	Hendrick	Dzaleka	Vg36	6	2	1	1	70	1	1	2	1		1	0	2	3	3	0	0	0	0	0		1	0	0	1	0	0	0	0	0	1	0	1	0		media\1412598198183.jpg
2	2014-12-08 13:31:55	2014-12-08 17:21:01	2014-12-08	359000000000000	Alex	Chinthembwe	Vg7	14	2	3	2	41	1	1	2	1		5	1	3	9	3	0	0	0	1	0		1	0	0	1	0	0	0	0	0	0	0	1	0		media\1418038639398.jpg
2	2014-12-09 13:13:55	2014-12-09 17:43:46	2014-12-09	359000000000000	Alex	Chinthembwe	Vg30	19	8	1	1	35	1	1	2	1		5	3	0	8	3	0	0	0	0	0		1	0	0	1	0	0	0	0	0	0	0	1	0		media\1418124316514.jpg
2	2014-12-11 12:16:38	2014-12-11 16:10:59	2014-12-11	359000000000000	Alex	Chinthembwe	Vg50	18	2	3	2	20	1	1	2	1		1	2	0	3	3	0	0	0	0	0		1	0	0	1	0	0	0	0	0	0	0	1	0		media\1418293264502.jpg
2	2014-12-11 13:02:38	2014-12-11 16:13:25	2014-12-11	359000000000000	Alex	Chinthembwe	Vg50	23	1	3	2	31	1	1	2	1		3	2	0	5	3	0	0	0	0	0		1	0	0	1	0	0	0	0	0	0	0	1	0		media\1418297440585.jpg
2	2014-11-07 13:11:44	2014-11-12 22:21:17	2014-11-07	359000000000000	Alex	Mzandu	Vg135	28	3	2	2	46	1	1	1	1		1	0	2	3	3	0	0	0	1	0		1	0	0	1	0	0	0	0	0	0	0	1	0		media\1415359616445.jpg
2	2014-10-15 12:14:38	2014-10-15 19:12:19	2014-10-15	360000000000000	Eddah	Chisepo	Vg21	29	9	6	2	18	2	4	3	5		2	5	2	9	3	0	0	1	1	0		1	0	0	1	0	0	0	0	0	0	0	1	0		media\1413381789994.jpg
2	2014-12-16 10:49:19	2014-12-17 07:44:05	2014-12-16	359000000000000	Alex	Chinthembwe	Vg7	21	8	3	2	36	1	1	2	1		5	3	0	8	3	0	0	0	1	0		1	0	0	1	0	0	0	0	0	0	0	1	0		media\1418720228623.jpg
2	2015-03-18 11:22:12	2015-03-18 17:37:37	2015-03-18	356000000000000	Maureen	Kasese	Vg25	10	2	3	2	24	1	1	2	1		2	2	0	4	3	0	0	0	0	0		1	0	0	1	0	0	0	0	0	0	0	1	0		media\1426670747135.jpg
2	2015-03-02 13:14:58	2015-03-03 07:14:40	2015-03-02	360000000000000	Kalua	Khuwi	Vg145	1	1	1	1	62	1	1	2	1		1	2	2	5	3	0	0	0	1	0		1	0	0	1	1	0	0	0	0	0	0	0	0		media\1425295183458.jpg	media\1425295212599.jpg
2	2014-10-31 12:16:46	2014-10-31 15:28:45	2014-10-31	356000000000000	Maureen	Chakhaza	Vg28	29	1	1	1	71	1	1	2	1		0	0	2	2	3	0	0	0	0	0		1	0	0	1	0	0	0	0	0	0	0	1	0		media\1414751145471.jpg
2	2014-12-04 13:46:58	2014-12-04 18:23:43	2014-12-04	359000000000000	Alex	Nalunga	Vg69	16	1	1	1	44	1	1	2	1		3	3	1	7	3	0	0	0	1	0		1	0	0	1	0	0	0	0	0	0	0	1	0		media\1417694437782.jpg
2	2014-12-04 14:04:18	2014-12-04 18:24:20	2014-12-04	359000000000000	Alex	Nalunga	Vg69	16	2	3	2	34	1	1	2	1		3	3	1	7	3	0	0	1	1	0		1	0	0	1	0	0	0	0	0	0	0	1	0		media\1417694926482.jpg
2	2014-12-04 14:59:15	2014-12-04 18:26:36	2014-12-04	359000000000000	Alex	Nalunga	Vg69	13	2	3	2	24	1	1	2	1		3	2	0	5	3	0	0	0	1	0		1	0	0	1	0	0	0	0	0	0	0	0	0		media\1417698300939.jpg
2	2014-12-05 13:43:33	2014-12-05 18:52:45	2014-12-05	359000000000000	Alex	Nalunga	Vg96	7	1	1	1	62	1	1	2	1		0	0	2	2	3	0	0	1	1	0		1	0	0	1	0	0	0	0	0	0	0	1	0		media\1417781001730.jpg
2	2014-12-05 14:08:48	2014-12-05 18:53:04	2014-12-05	359000000000000	Alex	Nalunga	Vg96	7	2	3	2	52	1	1	2	1		0	0	2	2	3	0	0	0	1	0		1	0	0	1	0	0	0	0	0	0	0	1	0		media\1417781706687.jpg
2	2014-10-06 12:20:49	2014-10-06 18:34:51	2014-10-06	359000000000000	Hendrick	Dzaleka	Vg36	46	30	3	2	30	1	1	2	2		5	3	0	8	3	0	0	0	0	0		1	0	0	1	0	0	0	0	0	0	0	1	0		media\1412591372263.jpg
2	2015-01-07 15:07:24	2015-01-07 18:43:59	2015-01-07	360000000000000	Saukila	Msakambewa	Vg60	7	2	3	2	28	1	1	2	1		5	2	0	7	3	0	1	0	0	0		1	0	1	1	0	0	0	0	0	1	0	1	0		media\1420636405582.jpg	media\1420636445519.jpg	media\1420636505057.jpg
2	2015-01-07 15:25:20	2015-01-07 19:43:26	2015-01-07	359000000000000	Valens	Mwangala	Vg120	16	3	1	1	45	1	1	2	1		3	3	2	8	3	0	1	1	1	0		1	0	0	1	0	0	0	0	0	0	0	1	0		media\1420637637018.jpg
2	2014-12-09 11:42:16	2014-12-09 17:45:22	2014-12-09	359000000000000	Alex	Chinthembwe	Vg30	27	7	1	2	42	1	1	2	1		4	2	2	8	3	0	0	1	1	0		1	0	0	1	0	0	0	0	0	0	0	1	0		media\1418120588360.jpg
2	2014-10-15 14:46:49	2014-10-16 15:35:45	2014-10-15	360000000000000	Brian	Chisepo	Vg29	12	2	3	2	64	1	1	1	1		0	0	2	2	3	0	0	0	0	0		1	0	0	1	0	0	0	0	0	1	0	1	0		media\1413377569004.jpg
2	2015-01-15 14:16:24	2015-01-15 18:57:40	2015-01-15	360000000000000	Eddah	Bowe	Vg10	37	2	3	2	44	1	1	2	1		3	1	2	6	3	0	0	0	0	0		1	0	0	1	0	0	0	0	0	0	0	1	0		media\1421324716071.jpg	media\1421324761379.jpg	media\1421324799035.jpg
2	2014-10-20 11:35:12	2014-10-20 17:59:24	2014-10-20	360000000000000	Eddah	Kayembe	Vg32	26	3	5	1	18	1	4	3	5		0	1	2	3	3	0	0	1	1	0		1	0	0	1	0	0	0	0	0	0	0	1	0		media\1413798418941.jpg	media\1413798464338.jpg
2	2014-10-21 10:29:03	2014-10-21 17:03:21	2014-10-21	360000000000000	Eddah	Kayembe	Vg82	10	2	3	2	37	1	1	2	1		4	2	0	6	3	0	1	1	1	0		1	0	0	1	0	0	0	0	0	0	0	1	0		media\1413881296036.jpg	media\1413881321076.jpg	media\1413881361040.jpg
2	2014-11-27 13:13:18	2014-11-29 13:57:24	2014-11-27	356000000000000	Maureen	Nthondo	Vg41	8	1	1	1	45	1	1	2	3		1	1	1	3	3	0	0	0	0	0		1	0	0	1	0	0	0	0	0	0	0	1	0		media\1417087268948.jpg
2	2014-11-27 13:13:18	2014-11-29 13:57:24	2014-11-27	356000000000000	Maureen	Nthondo	Vg41	8	1	1	1	45	1	1	2	3		1	1	1	3	3	0	0	0	0	0		1	0	0	1	0	0	0	0	0	0	0	1	0		media\1417087268948-2.jpg
2	2015-02-27 16:39:10	2015-02-27 19:11:31	2015-02-27	360000000000000	Eddah	Mvera Mission	Vg34	17	1	1	1	75	1	1	1	1		0	3	2	5	3	1	0	1	1	1	Heart palpitation and Pneumonia	1	0	0	1	0	0	0	0	0	0	0	1	0		media\1425048768348.jpg	media\1425048790282.jpg
2	2014-10-01 12:24:48	2014-10-02 18:03:48	2014-10-01	360000000000000	Eddah	Dzoole	Vg79	31	2	3	2	62	1	1	1	1		0	2	2	4	3	1	1	1	1	0		1	0	0	1	0	0	0	0	0	0	0	1	0		media\1412159662709.jpg
2	2015-03-13 12:23:34	2015-03-14 11:02:44	2015-03-13	356000000000000	Maureen	Mbingwa	Vg38	8	2	3	2	70	1	1	1	1		0	0	2	2	3	1	0	1	0	0		1	0	0	1	0	0	0	0	0	0	0	1	0		media\1426242719844.jpg	media\1426242835598.jpg	media\1426242802098.jpg
2	2015-03-28 12:20:54	2015-03-28 18:56:12	2015-03-28	360000000000000	Eddah	Mndinda	Vg32	11	1	1	1	66	1	1	2	1		2	0	2	4	3	1	0	1	1	0		1	0	0	1	0	0	0	0	0	0	0	1	0		media\1427538441663.jpg	media\1427538476624.jpg	media\1427538499268.jpg
2	2014-11-25 14:21:16	2014-11-25 18:22:06	2014-11-25	360000000000000	Eddah	Chinguluwe	Vg84	6	1	1	1	53	1	1	1	1		4	2	1	7	3	1	1	0	1	1	Painful left side of the ribs	1	0	0	1	0	0	0	0	0	0	0	1	0		media\1416918642089.jpg	media\1416918684005.jpg	media\1416918719685.jpg
2	2015-03-30 11:14:05	2015-03-30 18:09:03	2015-03-30	359000000000000	Gausi	Mndinda	Vg46	26	1	1	1	27	1	1	2	1		1	2	0	3	3	0	0	0	0	0		1	0	0	0	0	0	0	0	0	0	0	0	0
2	2015-03-30 11:17:03	2015-03-30 18:09:31	2015-03-30	359000000000000	Gausi	Mndinda	Vg46	26	2	3	2	23	1	1	2	1		1	2	0	3	3	0	0	0	0	0		1	0	0	0	0	0	0	0	0	0	0	0	0
2	2015-03-30 11:22:26	2015-03-30 18:21:16	2015-03-30	360000000000000	Patrick	Mndinda	Vg47	5	2	3	2	31	1	1	2	1		4	2	0	6	3	0	0	0	0	0		1	0	0	0	0	0	0	0	0	0	0	0	0
2	2015-03-30 11:22:33	2015-03-30 18:14:07	2015-03-30	359000000000000	Valens	Mndinda	Vg35	6	2	3	2	50	1	1	1	1		1	2	3	6	3	0	0	1	0	0		1	0	0	0	0	0	0	0	0	0	0	0	0
2	2015-03-30 11:39:16	2015-03-30 18:08:31	2015-03-30	356000000000000	Halima	Mndinda	Vg40	22	1	1	1	55	1	1	1	1		1	3	2	6	3	0	0	0	0	0		1	0	0	0	0	0	0	0	0	0	0	0	0
2	2015-03-30 11:39:22	2015-03-30 17:24:09	2015-03-30	360000000000000	Eddah	Mndinda	Vg50	8	1	1	1	28	1	1	2	1		1	2	0	3	3	0	0	0	0	0		1	0	0	0	0	0	0	0	0	0	0	0	0
2	2015-03-30 11:39:24	2015-03-30 17:34:57	2015-03-30	359000000000000	Collins	Mndinda	Vg44	9	1	1	1	58	1	4	2	1		1	1	1	3	3	0	0	0	0	0		1	0	0	0	0	0	0	0	0	0	0	0	0
2	2015-03-30 11:42:11	2015-03-30 17:35:23	2015-03-30	359000000000000	Collins	Mndinda	Vg44	9	2	6	1	18	1	4	2	1		1	1	1	3	3	0	0	0	0	0		1	0	0	0	0	0	0	0	0	0	0	0	0
2	2015-03-30 11:44:30	2015-03-30 17:24:29	2015-03-30	360000000000000	Eddah	Mndinda	Vg50	8	2	3	2	24	1	1	2	1		1	2	0	3	3	0	0	0	0	0		1	0	0	0	0	0	0	0	0	0	0	0	0
2	2015-03-30 11:46:28	2015-03-30 18:22:23	2015-03-30	359000000000000	Alex	Mndinda	Vg37	24	1	3	2	21	1	1	2	1		1	2	0	3	3	0	0	0	0	0		1	0	0	0	0	0	0	0	0	0	0	0	0
2	2015-03-30 11:54:58	2015-03-30 17:37:28	2015-03-30	359000000000000	Collins	Mndinda	Vg44	10	1	1	1	35	1	1	2	1		4	2	0	6	3	0	0	0	0	0		1	0	0	0	0	0	0	0	0	0	0	0	0
2	2015-03-30 11:55:23	2015-03-30 18:10:36	2015-03-30	359000000000000	Gausi	Mndinda	Vg46	12	1	1	2	40	1	2	2	1		2	2	2	6	3	0	0	0	0	0		1	0	0	0	0	0	0	0	0	0	0	0	0
2	2015-03-30 11:55:41	2015-03-30 17:56:50	2015-03-30	360000000000000	Kalua	Mndinda	Vg49	4	3	5	1	19	1	4	2	5		1	2	2	5	3	0	0	0	0	0		1	0	0	0	0	0	0	0	0	0	0	0	0
2	2015-03-30 11:55:56	2015-03-30 18:09:16	2015-03-30	356000000000000	Halima	Mndinda	Vg40	22	2	3	2	53	1	1	1	1		1	3	2	6	3	0	0	0	0	0		1	0	0	0	0	0	0	0	0	0	0	0	0
2	2015-03-30 11:58:15	2015-03-30 17:37:54	2015-03-30	359000000000000	Collins	Mndinda	Vg44	10	2	3	2	37	1	1	2	1		4	2	0	6	3	0	0	0	0	0		1	0	0	0	0	0	0	0	0	0	0	0	0
2	2015-03-30 11:58:36	2015-03-30 18:09:29	2015-03-30	356000000000000	Halima	Mndinda	Vg40	22	4	5	1	17	1	4	2	5		1	3	2	6	3	0	0	0	0	0		1	0	0	0	0	0	0	0	0	0	0	0	0
2	2015-03-30 11:59:08	2015-03-30 18:11:02	2015-03-30	359000000000000	Gausi	Mndinda	Vg46	12	2	5	2	18	1	4	2	5		2	2	2	6	3	0	0	0	0	0		1	0	0	0	0	0	0	0	0	0	0	0	0
2	2015-03-30 12:01:06	2015-03-30 18:09:47	2015-03-30	356000000000000	Halima	Mndinda	Vg40	22	5	5	2	15	1	4	2	5		1	3	2	6	3	0	0	0	0	0		1	0	0	0	0	0	0	0	0	0	0	0	0
2	2015-03-30 12:01:51	2015-03-30 18:11:19	2015-03-30	359000000000000	Gausi	Mndinda	Vg46	12	3	5	1	15	1	4	2	5		2	2	2	6	3	0	0	0	0	0		1	0	0	0	0	0	0	0	0	0	0	0	0
2	2015-03-30 12:03:22	2015-03-30 17:25:02	2015-03-30	360000000000000	Eddah	Mndinda	Vg50	20	1	1	1	35	1	1	2	1		2	2	0	4	3	0	0	0	0	0		1	0	0	0	0	0	0	0	0	0	0	0	0
2	2015-03-30 12:03:50	2015-03-30 18:23:02	2015-03-30	359000000000000	Alex	Mndinda	Vg37	5	2	2	1	23	1	1	2	1		0	2	0	2	3	0	0	0	0	0		1	0	0	0	0	0	0	0	0	0	0	0	0
2	2015-03-30 12:04:22	2015-03-30 18:11:40	2015-03-30	359000000000000	Gausi	Mndinda	Vg46	12	6	4	2	72	1	3	1	1		2	2	2	6	3	0	0	0	0	0		1	0	0	0	0	0	0	0	0	0	0	1	0		media\1427709989980.jpg
2	2015-03-30 12:05:50	2015-03-30 17:58:52	2015-03-30	359000000000000	Phonex	Mndinda	Vg43	22	2	3	2	43	1	1	2	1		2	3	2	7	3	0	0	0	0	0		1	0	0	0	0	0	0	0	0	0	0	0	0
2	2015-03-30 12:07:00	2015-03-30 18:22:23	2015-03-30	360000000000000	Patrick	Mndinda	Vg47	18	2	3	2	22	1	1	2	1		1	2	0	3	3	0	0	0	0	0		1	0	0	0	0	0	0	0	0	0	0	0	0
2	2015-03-30 12:08:19	2015-03-30 17:25:39	2015-03-30	360000000000000	Eddah	Mndinda	Vg50	20	2	3	2	29	1	1	2	1		2	2	0	4	3	0	0	0	0	0		1	0	0	0	0	0	0	0	0	0	0	0	0
2	2015-03-30 12:14:43	2015-03-30 18:10:22	2015-03-30	356000000000000	Halima	Mndinda	Vg40	26	1	3	2	29	1	1	2	1		2	2	0	4	3	0	0	0	0	0		1	0	0	0	0	0	0	0	0	0	0	0	0
2	2015-03-30 12:17:25	2015-03-30 18:23:27	2015-03-30	359000000000000	Alex	Mndinda	Vg37	3	1	1	1	65	1	1	1	1		2	2	2	6	3	0	0	0	0	0		1	0	0	0	0	0	0	0	0	0	0	0	0
2	2015-03-30 12:22:34	2015-03-30 17:59:17	2015-03-30	359000000000000	Phonex	Mndinda	Vg43	12	2	3	2	40	1	1	2	1		2	1	2	5	3	0	0	0	0	0		1	0	0	0	0	0	0	0	0	0	0	0	0
2	2015-03-30 12:26:50	2015-03-30 17:59:28	2015-03-30	359000000000000	Phonex	Mndinda	Vg43	12	3	5	1	17	1	4	2	5		2	1	2	5	3	0	0	0	0	0		1	0	0	0	0	0	0	0	0	0	0	0	0
2	2015-03-30 12:28:52	2015-03-30 17:39:51	2015-03-30	359000000000000	Collins	Mndinda	Vg44	6	1	3	2	78	1	1	1	1		0	0	2	2	3	0	0	0	0	0		1	0	0	0	0	1	0	0	0	0	0	1	0		media\1427711676865.jpg
2	2015-03-30 12:31:49	2015-03-30 18:14:37	2015-03-30	359000000000000	Valens	Mndinda	Vg35	3	2	3	2	20	1	1	2	1		2	2	0	4	3	0	0	0	0	0		1	0	0	0	0	0	0	0	0	0	0	0	0
2	2015-03-30 12:33:14	2015-04-02 17:33:32	2015-03-30	356000000000000	Maureen	Mndinda	Vg41	15	2	3	2	36	1	1	1	2		4	1	1	6	3	0	0	0	0	0		1	0	0	0	0	0	0	0	0	0	0	0	0
2	2015-03-30 12:34:04	2015-03-30 18:14:01	2015-03-30	359000000000000	Gausi	Mndinda	Vg46	14	1	1	1	24	1	1	2	1		2	2	0	4	3	0	0	0	0	0		1	0	0	0	0	0	0	0	0	0	0	1	0		media\1427711804871.jpg
2	2015-03-30 12:35:35	2015-03-30 18:10:50	2015-03-30	356000000000000	Halima	Mndinda	Vg40	29	1	3	2	36	1	1	1	1		4	4	1	9	3	0	0	0	0	0		1	0	0	0	0	0	0	0	0	0	0	0	0
2	2015-03-30 12:37:35	2015-03-30 18:24:05	2015-03-30	359000000000000	Alex	Mndinda	Vg37	3	6	3	2	50	1	1	1	1		2	2	2	6	3	0	0	0	0	0		1	0	0	0	0	0	0	0	0	0	0	0	0
2	2015-03-30 12:38:46	2015-03-30 18:14:19	2015-03-30	359000000000000	Gausi	Mndinda	Vg46	14	2	3	2	23	1	1	2	1		2	2	0	4	3	0	0	0	0	0		1	0	0	0	0	0	0	0	0	0	0	0	0
2	2015-03-30 12:40:13	2015-03-30 18:24:33	2015-03-30	360000000000000	Patrick	Mndinda	Vg47	27	1	1	1	37	1	1	2	1		2	2	0	4	3	0	0	0	0	0		1	0	0	0	0	0	0	0	0	0	0	0	0
2	2015-03-30 12:42:28	2015-03-30 18:14:46	2015-03-30	359000000000000	Valens	Mndinda	Vg35	3	1	1	1	24	1	1	2	1		2	2	0	4	3	0	0	0	0	0		1	0	0	0	0	0	0	0	0	0	0	0	0
2	2015-03-30 12:48:35	2015-03-30 18:01:58	2015-03-30	360000000000000	Kalua	Mndinda	Vg49	16	1	1	1	33	1	1	2	1		2	2	0	4	3	0	0	0	0	0		1	0	0	0	0	0	0	0	0	0	0	0	0
2	2015-03-30 12:50:02	2015-03-30 17:40:34	2015-03-30	359000000000000	Collins	Mndinda	Vg44	5	1	3	2	26	1	1	2	1		3	2	0	5	3	0	0	0	0	0		1	0	0	0	0	0	0	0	0	0	0	0	0
2	2015-03-30 12:50:36	2015-03-30 17:26:14	2015-03-30	360000000000000	Eddah	Mndinda	Vg50	5	1	1	1	32	1	1	2	2		5	3	0	8	3	0	0	0	0	0		1	0	0	0	0	0	0	0	0	0	0	0	0
2	2015-03-30 12:52:08	2015-03-30 18:02:34	2015-03-30	360000000000000	Kalua	Mndinda	Vg49	16	2	3	2	26	1	1	2	1		2	2	0	4	3	0	0	0	0	0		1	0	0	0	0	0	0	0	0	0	0	0	0
2	2015-03-30 12:54:22	2015-03-30 18:24:31	2015-03-30	359000000000000	Alex	Mndinda	Vg37	6	1	1	1	38	1	1	2	1		3	2	0	5	3	0	0	0	0	0		1	0	0	0	0	0	0	0	0	0	0	0	0
2	2015-03-30 12:54:25	2015-03-30 18:11:02	2015-03-30	356000000000000	Halima	Mndinda	Vg40	29	3	5	1	22	1	1	3	1		4	4	1	9	3	0	0	0	0	1	Chest pain	1	0	0	0	0	0	0	0	0	0	0	0	0
2	2015-03-30 12:56:14	2015-04-02 17:34:36	2015-03-30	356000000000000	Maureen	Mndinda	Vg41	13	1	1	1	25	1	1	2	1		4	2	0	6	3	0	0	0	0	0		1	0	0	0	0	0	0	0	0	0	0	0	0
2	2015-03-30 12:57:45	2015-03-30 17:26:42	2015-03-30	360000000000000	Eddah	Mndinda	Vg50	5	2	3	2	30	1	1	1	1		5	3	0	8	3	0	0	0	0	0		1	0	0	0	0	0	0	0	0	0	0	0	0
2	2015-03-30 12:59:03	2015-03-30 18:11:13	2015-03-30	356000000000000	Halima	Mndinda	Vg40	29	4	5	2	17	1	4	2	5		4	4	1	9	3	0	0	1	0	1	Chest pain	1	0	0	0	0	0	0	0	0	0	0	0	0
2	2015-03-30 12:59:49	2015-03-30 17:27:11	2015-03-30	360000000000000	Eddah	Mndinda	Vg50	5	3	5	1	15	1	4	2	5		5	3	0	8	3	0	0	0	0	0		1	0	0	0	0	0	0	0	0	0	0	0	0
2	2015-03-30 13:04:26	2015-03-30 18:00:07	2015-03-30	359000000000000	Phonex	Mndinda	Vg43	15	2	1	2	26	1	1	2	1		2	4	0	6	3	0	0	0	0	0		1	0	0	0	0	0	0	0	0	0	0	0	0
2	2015-03-30 13:05:06	2015-03-30 18:12:33	2015-03-30	356000000000000	Halima	Mndinda	Vg40	29	8	7	2	19	1	1	2	1		4	4	1	9	3	0	0	0	0	0		1	0	0	0	0	0	0	0	0	0	0	0	0
2	2015-03-30 13:08:38	2015-03-30 18:00:18	2015-03-30	359000000000000	Phonex	Mndinda	Vg43	15	4	6	1	20	1	4	3	5		2	4	0	6	3	0	0	0	0	0		1	0	0	0	0	0	0	0	0	0	0	0	0
2	2015-03-30 13:10:01	2015-03-30 18:21:46	2015-03-30	356000000000000	Maureen	Mndinda	Vg41	13	2	3	2	25	1	1	2	1		4	2	0	6	3	0	0	0	0	0		1	0	0	0	0	0	0	0	0	0	0	0	0
2	2015-03-30 13:12:17	2015-03-30 17:41:31	2015-03-30	359000000000000	Collins	Mndinda	Vg44	2	1	1	1	35	1	1	2	1		5	2	0	7	4	0	0	0	0	0		1	0	0	0	0	0	0	0	0	0	0	0	0
2	2015-03-30 13:16:33	2015-03-30 17:42:12	2015-03-30	359000000000000	Collins	Mndinda	Vg44	2	2	3	2	26	1	1	1	1		5	2	0	7	3	0	0	0	0	0		1	0	0	0	0	0	0	0	0	0	0	0	0
2	2015-03-30 13:20:26	2015-03-30 18:26:03	2015-03-30	360000000000000	Patrick	Mndinda	Vg47	24	2	3	2	36	1	1	2	1		6	1	2	9	3	0	0	0	0	0		1	0	0	0	0	0	0	0	0	0	0	0	0
2	2015-03-30 13:21:10	2015-03-30 18:00:49	2015-03-30	359000000000000	Phonex	Mndinda	Vg43	18	1	1	2	54	1	3	2	2		0	1	1	2	3	0	0	0	0	0		1	0	0	0	0	0	0	0	0	0	0	0	0
2	2015-03-30 13:22:20	2015-03-30 17:29:59	2015-03-30	360000000000000	Eddah	Mndinda	Vg50	32	2	3	2	56	1	1	1	1		0	4	2	6	3	0	0	0	0	0		1	0	0	0	0	0	0	0	0	0	0	0	0
2	2015-03-30 13:23:15	2015-03-30 18:25:01	2015-03-30	359000000000000	Alex	Mndinda	Vg37	21	1	1	2	40	1	3	1	1		3	1	1	5	3	0	0	0	0	0		1	0	0	0	0	0	0	0	0	0	0	0	0
2	2015-03-30 13:23:41	2015-03-30 18:13:04	2015-03-30	356000000000000	Halima	Mndinda	Vg40	23	1	1	2	23	1	2	2	1		3	1	0	4	3	0	0	0	0	0		1	0	0	0	0	0	0	0	0	0	0	0	0
2	2015-03-30 13:27:05	2015-03-30 17:30:18	2015-03-30	360000000000000	Eddah	Mndinda	Vg50	32	3	5	1	25	1	4	2	1		0	4	2	6	3	0	0	0	0	0		1	0	0	0	0	0	0	0	0	0	0	0	0
2	2015-03-30 13:28:06	2015-03-30 18:01:00	2015-03-30	359000000000000	Phonex	Mndinda	Vg43	18	2	5	2	15	1	4	2	5		0	1	1	2	3	0	0	0	0	0		1	0	0	0	0	0	0	0	0	0	0	0	0
2	2015-03-30 13:31:23	2015-03-30 18:22:30	2015-03-30	356000000000000	Maureen	Mndinda	Vg41	2	3	5	1	23	1	4	3	1		1	2	1	4	3	0	0	0	0	0		1	0	0	0	0	0	0	0	0	0	0	0	0
2	2015-03-30 13:34:48	2015-03-31 08:07:11	2015-03-30	359000000000000	Valens	Mndinda	Vg35	15	1	1	2	75	1	3	1	1		3	0	1	4	3	0	0	0	0	0		1	0	0	0	0	0	0	0	0	0	0	1	0		media\1427715554720.jpg	media\1427715581318.jpg
2	2015-03-30 13:35:09	2015-03-30 18:04:13	2015-03-30	360000000000000	Kalua	Mndinda	Vg49	13	2	3	2	19	1	1	2	1		1	2	0	3	3	0	0	0	0	0		1	0	0	0	0	0	0	0	0	0	0	0	0
2	2015-03-30 13:37:13	2015-03-30 17:31:31	2015-03-30	360000000000000	Eddah	Mndinda	Vg50	32	6	5	2	17	1	4	2	1		0	4	2	6	3	0	0	0	0	0		1	0	0	0	0	0	0	0	0	0	0	0	0
2	2015-03-30 13:39:27	2015-03-30 18:01:41	2015-03-30	359000000000000	Phonex	Mndinda	Vg43	21	1	1	1	25	1	1	3	2		2	2	0	4	3	0	0	0	0	0		1	0	0	0	0	0	0	0	0	0	0	0	0
2	2015-03-30 13:41:19	2015-03-30 18:25:36	2015-03-30	359000000000000	Alex	Mndinda	Vg37	22	1	3	2	24	1	1	1	1		3	2	0	5	3	0	0	0	0	0		1	0	0	0	0	0	0	0	0	0	0	0	0
2	2015-03-30 13:41:41	2015-03-30 18:01:52	2015-03-30	359000000000000	Phonex	Mndinda	Vg43	21	2	3	2	22	1	1	2	2		2	2	0	4	3	0	0	0	0	0		1	0	0	0	0	0	0	0	0	0	0	0	0
2	2015-03-30 13:42:41	2015-03-30 17:42:50	2015-03-30	359000000000000	Collins	Mndinda	Vg44	16	1	3	2	20	1	1	2	1		0	2	0	2	3	0	0	0	0	0		1	0	0	0	0	0	0	0	0	0	0	0	0
2	2015-03-30 13:42:44	2015-03-30 18:13:22	2015-03-30	356000000000000	Halima	Mndinda	Vg40	21	1	1	1	40	1	1	1	1		3	2	1	6	3	0	0	0	0	0		1	0	0	0	0	0	0	0	0	0	0	0	0
2	2015-03-30 13:47:33	2015-03-30 18:15:10	2015-03-30	359000000000000	Gausi	Mndinda	Vg46	4	1	1	1	46	1	1	2	1		1	2	2	5	3	0	0	0	0	0		1	0	0	0	0	0	0	0	0	0	0	0	0
2	2015-03-30 13:48:38	2015-03-30 18:25:56	2015-03-30	359000000000000	Alex	Mndinda	Vg37	22	2	1	1	30	1	1	2	1		3	2	0	5	3	0	0	0	0	0		1	0	0	0	0	1	0	0	0	0	0	1	0		media\1427716289301.jpg
2	2015-03-30 13:51:52	2015-03-30 18:15:29	2015-03-30	359000000000000	Gausi	Mndinda	Vg46	4	2	3	2	45	1	1	2	1		1	2	2	5	3	0	0	0	0	0		1	0	0	0	0	0	0	0	0	0	0	0	0
2	2015-03-30 13:52:56	2015-03-30 18:02:06	2015-03-30	359000000000000	Phonex	Mndinda	Vg43	22	1	1	1	46	1	1	2	1		2	3	2	7	3	0	0	0	0	0		1	0	0	0	0	0	0	0	0	0	0	1	0		media\1427716708998.jpg
2	2015-03-30 13:53:36	2015-03-30 18:13:32	2015-03-30	356000000000000	Halima	Mndinda	Vg40	21	2	3	2	34	1	1	1	1		3	2	1	6	3	0	0	0	0	0		1	0	0	0	0	0	0	0	0	0	0	0	0
2	2015-03-30 13:54:30	2015-03-30 18:15:50	2015-03-30	359000000000000	Gausi	Mndinda	Vg46	4	3	5	1	17	1	4	3	5		1	2	2	5	3	0	0	0	0	0		1	0	0	0	0	0	0	0	0	0	0	0	0
2	2015-03-30 13:57:21	2015-03-30 18:13:45	2015-03-30	356000000000000	Halima	Mndinda	Vg40	21	3	5	2	17	1	4	2	5		3	2	1	6	3	0	0	0	0	0		1	0	0	0	0	0	0	0	0	0	0	0	0
2	2015-03-30 13:57:34	2015-03-30 18:16:19	2015-03-30	359000000000000	Gausi	Mndinda	Vg46	4	5	5	2	15	1	4	2	5		1	2	2	5	3	0	0	0	0	0		1	0	0	0	0	0	0	0	0	0	0	0	0
2	2015-03-30 14:00:39	2015-03-30 18:05:49	2015-03-30	360000000000000	Kalua	Mndinda	Vg49	12	2	3	2	30	1	1	2	1		3	1	1	5	3	0	0	0	0	0		1	0	0	0	0	0	0	0	0	0	0	0	0
2	2015-03-30 14:04:54	2015-03-30 18:26:23	2015-03-30	359000000000000	Alex	Mndinda	Vg37	9	1	1	2	50	1	2	1	1		1	2	1	4	3	0	0	0	0	0		1	0	0	0	0	0	0	0	0	0	0	0	0
2	2015-03-30 14:08:52	2015-03-31 08:07:37	2015-03-30	359000000000000	Valens	Mndinda	Vg35	20	1	1	1	28	1	1	2	1		3	2	0	5	3	0	0	0	0	0		1	0	0	0	0	0	0	0	0	0	0	0	0
2	2015-03-30 14:12:01	2015-03-30 18:14:03	2015-03-30	356000000000000	Halima	Mndinda	Vg40	17	1	1	1	65	1	1	1	1		1	0	2	3	3	0	0	0	0	0		1	0	0	0	0	0	0	0	0	0	0	0	0
2	2015-03-30 14:12:41	2015-03-30 18:16:55	2015-03-30	359000000000000	Gausi	Mndinda	Vg46	1	1	1	2	70	1	2	1	1		0	0	1	1	3	0	0	0	0	0		1	0	0	0	0	0	0	0	0	0	0	0	0
2	2015-03-30 14:14:02	2015-03-31 08:07:50	2015-03-30	359000000000000	Valens	Mndinda	Vg35	20	2	3	2	24	1	1	2	1		3	2	0	5	3	0	0	0	0	0		1	0	0	0	0	0	0	0	0	0	0	0	0
2	2015-03-30 14:17:16	2015-03-30 18:23:45	2015-03-30	356000000000000	Maureen	Mndinda	Vg41	9	1	1	2	67	1	1	1	1		0	3	1	4	3	0	0	0	0	0		1	0	0	0	0	0	0	0	0	0	0	0	0
2	2015-03-30 14:20:02	2015-03-30 18:03:38	2015-03-30	359000000000000	Phonex	Mndinda	Vg43	5	1	1	1	46	1	1	1	1		4	2	1	7	3	0	0	0	0	0		1	0	0	0	0	0	0	0	0	0	0	0	0
2	2015-03-30 14:21:20	2015-03-30 18:24:06	2015-03-30	356000000000000	Maureen	Mndinda	Vg41	9	4	5	2	16	1	4	2	5		0	3	1	4	3	0	0	0	0	0		1	0	0	0	0	0	0	0	0	0	0	0	0
2	2015-03-30 14:25:58	2015-03-30 18:03:49	2015-03-30	359000000000000	Phonex	Mndinda	Vg43	5	2	3	2	36	1	1	1	1		4	2	1	7	3	0	0	0	0	0		1	0	0	0	0	0	0	0	0	0	0	0	0
2	2015-03-30 14:28:14	2015-03-30 18:14:18	2015-03-30	356000000000000	Halima	Mndinda	Vg40	17	2	3	2	60	1	1	1	1		1	0	2	3	3	0	0	1	0	0		1	0	0	0	0	0	0	0	0	0	0	0	0
2	2015-03-30 14:30:36	2015-03-30 18:17:39	2015-03-30	359000000000000	Gausi	Mndinda	Vg46	10	1	1	2	68	1	3	1	1		0	1	1	2	3	0	0	0	0	0		1	0	0	0	0	0	0	0	0	0	0	1	0		media\1427718789676.jpg
2	2015-03-30 14:34:49	2015-03-30 18:24:16	2015-03-30	356000000000000	Maureen	Mndinda	Vg41	7	1	1	1	48	1	1	2	2		3	1	1	5	3	0	0	0	0	0		1	0	0	0	0	0	0	0	0	0	0	0	0
2	2015-03-30 14:36:14	2015-03-30 18:17:56	2015-03-30	359000000000000	Gausi	Mndinda	Vg46	10	2	5	2	17	1	4	2	5		0	1	1	2	3	0	0	0	0	0		1	0	0	0	0	0	0	0	0	0	0	0	0
2	2015-03-30 14:37:45	2015-03-30 18:27:43	2015-03-30	359000000000000	Alex	Mndinda	Vg37	8	2	3	2	36	1	1	2	1		5	1	1	7	3	0	0	0	0	0		1	0	0	0	0	0	0	0	0	0	0	0	0
2	2015-03-30 14:40:02	2015-03-30 18:27:38	2015-03-30	360000000000000	Patrick	Mndinda	Vg47	4	2	3	2	32	1	1	2	1		4	3	0	7	3	0	1	1	1	0		1	0	0	0	0	0	0	0	0	0	0	1	0		media\1427719442593.jpg
2	2015-03-30 14:43:19	2015-03-30 18:14:39	2015-03-30	356000000000000	Halima	Mndinda	Vg40	3	1	3	2	37	1	1	1	1		2	3	1	6	3	0	1	1	0	1	Chest pain	1	0	0	0	0	0	0	0	0	0	0	0	0
2	2015-03-30 14:45:35	2015-03-30 18:24:29	2015-03-30	356000000000000	Maureen	Mndinda	Vg41	7	2	3	2	37	1	1	2	1		3	1	1	5	3	0	0	0	0	0		1	0	0	0	0	0	0	0	0	0	0	0	0
2	2015-03-30 14:47:16	2015-03-30 18:28:01	2015-03-30	360000000000000	Patrick	Mndinda	Vg47	4	3	5	2	17	1	4	2	1		4	3	0	7	3	0	0	0	0	0		1	0	0	0	0	0	0	0	0	0	0	0	0
2	2015-03-30 14:47:42	2015-03-30 17:32:54	2015-03-30	360000000000000	Eddah	Mndinda	Vg50	28	2	3	2	46	1	1	1	1		2	1	2	5	3	0	0	0	0	0		1	0	0	0	0	0	0	0	0	0	0	0	0
2	2015-03-30 14:51:32	2015-03-30 17:33:12	2015-03-30	360000000000000	Eddah	Mndinda	Vg50	28	3	5	2	18	1	4	2	5		2	1	2	5	3	0	0	0	0	0		1	0	0	0	0	0	0	0	0	0	0	0	0
2	2015-03-30 14:54:41	2015-03-30 18:19:04	2015-03-30	359000000000000	Gausi	Mndinda	Vg46	18	1	1	2	48	1	2	2	1		3	1	1	5	3	0	0	0	0	0		1	0	0	0	0	0	0	0	0	0	0	0	0
2	2015-03-30 14:58:33	2015-03-31 13:27:54	2015-03-30	359000000000000	Gausi	Mndinda	Vg46	18	2	5	2	15	1	4	3	5		3	1	1	5	3	0	0	0	0	0		1	0	0	0	0	0	0	0	0	0	0	0	0
2	2015-03-30 15:01:17	2015-03-30 18:14:52	2015-03-30	356000000000000	Halima	Mndinda	Vg40	3	3	5	2	21	1	2	2	1		2	3	1	6	3	0	0	0	0	0		1	0	0	0	0	0	0	0	0	0	0	0	0
2	2015-03-30 15:03:40	2015-03-30 18:15:03	2015-03-30	356000000000000	Halima	Mndinda	Vg40	3	4	5	2	16	1	4	2	5		2	3	1	6	3	0	0	0	0	0		1	0	0	0	0	0	0	0	0	0	0	0	0
2	2015-03-30 15:03:55	2015-03-30 18:05:16	2015-03-30	359000000000000	Phonex	Mndinda	Vg43	2	2	3	2	63	1	1	2	1		1	0	2	3	3	0	0	0	0	0		1	0	0	0	0	1	0	0	0	0	0	1	0		media\1427720830148.jpg
2	2015-03-30 15:06:44	2015-03-30 18:15:14	2015-03-30	356000000000000	Halima	Mndinda	Vg40	3	2	1	1	67	1	1	2	1		2	3	1	6	3	0	0	0	0	0		1	0	0	0	0	0	0	0	0	0	0	0	0
2	2015-03-30 15:15:26	2015-03-30 18:15:34	2015-03-30	356000000000000	Halima	Mndinda	Vg40	11	1	3	2	51	1	1	1	1		3	0	2	5	3	0	0	0	0	0		1	0	0	0	0	0	0	0	0	0	0	0	0
2	2015-03-30 15:20:48	2015-03-30 18:25:03	2015-03-30	356000000000000	Maureen	Mndinda	Vg41	3	1	1	1	54	1	1	2	2		1	1	2	4	3	0	0	0	0	0		1	0	0	0	0	0	0	0	0	0	0	0	0
2	2015-03-30 15:22:29	2015-03-30 18:29:49	2015-03-30	360000000000000	Patrick	Mndinda	Vg47	1	2	3	2	31	1	1	2	1		2	2	0	4	3	0	0	0	0	0		1	0	0	0	0	0	0	0	0	0	0	0	0
2	2015-03-30 15:33:38	2015-03-30 18:25:14	2015-03-30	356000000000000	Maureen	Mndinda	Vg41	3	2	3	2	53	1	1	1	1		1	1	2	4	3	0	0	0	0	0		1	0	0	0	0	0	0	0	0	0	0	0	0
2	2015-03-30 15:36:45	2015-03-30 18:25:26	2015-03-30	356000000000000	Maureen	Mndinda	Vg41	3	4	5	1	16	1	4	2	5		1	1	2	4	3	0	0	0	0	0		1	0	0	0	0	0	0	0	0	0	0	0	0
2	2015-03-30 15:40:17	2015-03-30 18:05:34	2015-03-30	359000000000000	Phonex	Mndinda	Vg43	17	2	3	2	39	1	1	1	1		3	3	1	7	3	0	0	0	0	0		1	0	0	0	0	0	0	0	0	0	0	0	0
2	2015-03-30 15:45:13	2015-03-30 18:05:50	2015-03-30	359000000000000	Phonex	Mndinda	Vg43	17	1	1	1	41	1	1	2	1		3	3	1	7	3	0	0	0	0	0		1	0	0	0	0	0	0	0	0	0	0	1	0		media\1427723384552.jpg	media\1427723399373.jpg
2	2015-03-30 15:51:03	2015-03-30 18:06:06	2015-03-30	359000000000000	Phonex	Mndinda	Vg43	17	3	5	2	20	1	4	3	5		3	3	1	7	3	0	0	0	0	0		1	0	0	0	0	0	0	0	0	0	0	0	0
2	2015-03-30 15:55:05	2015-03-30 18:06:18	2015-03-30	359000000000000	Phonex	Mndinda	Vg43	17	4	5	2	16	1	4	3	5		3	3	1	7	3	0	0	0	0	0		1	0	0	0	0	0	0	0	0	0	0	0	0
2	2015-03-30 15:59:36	2015-03-31 08:08:27	2015-03-30	359000000000000	Valens	Mndinda	Vg35	11	2	3	2	27	1	1	2	1		4	2	0	6	3	0	0	0	0	0		1	0	0	0	0	0	0	0	0	0	0	0	0
2	2015-03-30 16:00:42	2015-03-31 08:08:39	2015-03-30	359000000000000	Valens	Mndinda	Vg35	11	1	1	1	30	1	1	2	1		4	2	0	6	3	0	0	0	0	0		1	0	0	0	0	0	0	0	0	0	0	0	0
2	2015-03-31 12:12:02	2015-03-31 18:32:37	2015-03-31	360000000000000	Patrick	Mndinda	Vg18	15	2	3	2	39	1	1	1	1		5	3	1	9	3	0	0	0	0	0		1	0	0	0	0	0	0	0	0	0	0	0	0
2	2015-03-31 12:28:48	2015-03-31 18:14:44	2015-03-31	359000000000000	Alex	Mndinda	Vg26	15	1	3	2	22	1	1	2	1		1	2	0	3	3	0	0	0	0	0		1	0	0	0	0	0	0	0	0	0	0	0	0
2	2015-03-31 12:44:48	2015-03-31 18:15:42	2015-03-31	359000000000000	Alex	Mndinda	Vg26	16	2	3	2	50	1	1	2	1		0	0	2	2	3	0	0	0	0	0		1	0	0	0	0	0	0	0	0	0	0	0	0
2	2015-03-31 12:50:08	2015-03-31 18:52:15	2015-03-31	359000000000000	Gausi	Mndinda	Vg18	11	1	1	2	62	1	2	1	1		3	1	1	5	3	0	0	0	0	0		1	0	0	0	0	0	0	0	0	0	0	0	0
2	2015-03-31 12:53:57	2015-03-31 18:52:40	2015-03-31	359000000000000	Gausi	Mndinda	Vg18	11	2	5	2	18	1	4	2	1		3	1	1	5	3	0	0	0	0	0		1	0	0	0	0	0	0	0	0	0	0	0	0
2	2015-03-31 12:56:18	2015-03-31 18:26:51	2015-03-31	356000000000000	Halima	Mndinda	Vg17	1	2	3	2	46	1	1	2	1		6	2	2	10	3	0	0	0	0	0		1	0	0	0	0	0	0	0	0	0	0	0	0
2	2015-03-31 12:59:01	2015-03-31 18:09:39	2015-03-31	359000000000000	Phonex	Mndinda	Vg34	12	1	1	1	49	1	1	2	1		3	3	2	8	3	0	0	0	0	0		1	0	0	0	0	0	0	0	0	0	0	0	0
2	2015-03-31 13:02:21	2015-03-31 18:09:52	2015-03-31	359000000000000	Phonex	Mndinda	Vg34	12	2	3	2	41	1	1	2	1		3	3	2	8	3	0	0	0	0	0		1	0	0	0	0	0	0	0	0	0	0	0	0
2	2015-03-31 13:04:42	2015-03-31 18:10:13	2015-03-31	359000000000000	Phonex	Mndinda	Vg34	12	4	5	1	20	1	4	3	5		3	3	2	8	3	0	0	0	0	0		1	0	0	0	0	0	0	0	0	0	0	0	0
2	2015-03-31 13:05:14	2015-03-31 18:12:47	2015-03-31	360000000000000	Eddah	Mndinda	Vg20	7	2	3	2	23	1	1	1	1		2	3	0	5	3	0	0	0	0	0		1	0	0	0	0	0	0	0	0	0	0	0	0
2	2015-03-31 13:06:15	2015-03-31 18:31:21	2015-03-31	358000000000000	Dalitso	Mndinda	Vg20	15	1	1	1	61	1	1	2	1		3	2	2	7	3	0	0	0	0	0		1	0	0	0	0	0	0	0	0	0	0	0	0
2	2015-03-31 13:07:28	2015-03-31 18:10:30	2015-03-31	359000000000000	Phonex	Mndinda	Vg34	12	5	5	1	16	1	4	2	1		3	3	2	8	3	0	0	0	0	0		1	0	0	0	0	0	0	0	0	0	0	0	0
2	2015-03-31 13:08:42	2015-03-31 18:06:52	2015-03-31	359000000000000	Collins	Mndinda	Vg20	14	5	1	1	38	1	1	2	1		3	2	1	6	3	0	0	0	0	0		1	0	0	0	0	0	0	0	0	0	0	0	0
2	2015-03-31 13:09:26	2015-03-31 18:22:22	2015-03-31	359000000000000	Valens	Mndinda	Vg17	4	2	5	1	27	1	4	2	1		2	3	2	7	3	0	0	0	0	0		1	0	0	0	0	0	0	0	0	0	0	0	0
2	2015-03-31 13:11:19	2015-03-31 18:21:41	2015-03-31	360000000000000	Kalua	Mndinda	Vg20	16	4	5	1	24	1	4	2	1		10	4	2	16	3	0	0	0	0	0		1	0	0	0	0	0	0	0	0	0	0	0	0
2	2015-03-31 13:12:06	2015-03-31 18:07:24	2015-03-31	359000000000000	Collins	Mndinda	Vg20	14	6	3	2	51	1	1	2	1		3	2	1	6	3	0	0	0	0	0		1	0	0	0	0	0	0	0	0	0	0	0	0
2	2015-03-31 13:14:34	2015-03-31 18:22:30	2015-03-31	360000000000000	Kalua	Mndinda	Vg20	16	3	5	2	29	1	2	2	1		10	4	2	16	3	0	0	0	0	0		1	0	0	0	0	0	0	0	0	0	0	0	0
2	2015-03-31 13:15:40	2015-03-31 18:31:43	2015-03-31	358000000000000	Dalitso	Mndinda	Vg20	15	2	3	2	57	1	1	1	1		3	2	2	7	3	0	0	0	0	0		1	0	0	0	0	0	0	0	0	0	0	0	0
2	2015-03-31 13:16:06	2015-03-31 18:53:22	2015-03-31	359000000000000	Gausi	Mndinda	Vg18	23	1	1	1	38	1	1	2	1		4	2	0	6	3	0	0	0	0	0		1	0	0	0	0	0	0	0	0	0	0	1	0		media\1427800870798.jpg
2	2015-03-31 13:18:55	2015-03-31 18:25:11	2015-03-31	356000000000000	Maureen	Mndinda	Vg26	5	2	3	2	22	1	1	2	1		2	2	0	4	3	0	0	0	0	0		1	0	0	0	0	0	0	0	0	0	0	0	0
2	2015-03-31 13:19:48	2015-03-31 18:24:34	2015-03-31	360000000000000	Kalua	Mndinda	Vg20	16	2	3	2	49	1	1	2	1		10	4	2	16	3	0	0	0	0	0		1	0	0	0	0	0	0	0	0	0	0	0	0
2	2015-03-31 13:22:22	2015-03-31 18:32:06	2015-03-31	358000000000000	Dalitso	Mndinda	Vg20	15	3	5	2	23	1	2	2	1		3	2	2	7	3	0	0	0	0	0		1	0	0	0	0	0	0	0	0	0	0	0	0
2	2015-03-31 13:22:30	2015-03-31 18:54:01	2015-03-31	359000000000000	Gausi	Mndinda	Vg18	23	2	3	2	30	1	1	1	1		4	2	0	6	3	0	0	0	0	0		1	0	0	0	0	0	0	0	0	0	0	1	0		media\1427801123262.jpg
2	2015-03-31 13:24:13	2015-03-31 18:25:39	2015-03-31	356000000000000	Maureen	Mndinda	Vg26	6	1	1	1	28	1	1	2	1		2	2	1	5	3	0	0	0	0	0		1	0	0	0	0	0	0	0	0	0	0	0	0
2	2015-03-31 13:30:44	2015-03-31 18:11:15	2015-03-31	359000000000000	Phonex	Mndinda	Vg34	8	1	1	1	34	1	1	2	3		4	2	0	6	3	0	0	0	0	0		1	0	0	0	0	0	0	0	0	0	0	0	0
2	2015-03-31 13:32:20	2015-03-31 18:25:54	2015-03-31	356000000000000	Maureen	Mndinda	Vg26	6	2	3	2	25	1	1	2	1		2	2	1	5	3	0	0	0	0	0		1	0	0	0	0	0	0	0	0	0	0	0	0
2	2015-03-31 13:35:24	2015-03-31 18:26:22	2015-03-31	356000000000000	Maureen	Mndinda	Vg26	6	5	4	2	45	1	2	2	1		2	2	1	5	3	0	0	0	0	0		1	0	0	0	0	0	0	0	0	0	0	0	0
2	2015-03-31 13:37:17	2015-03-31 18:11:28	2015-03-31	359000000000000	Phonex	Mndinda	Vg34	8	2	3	2	32	1	1	2	3		4	2	0	6	3	0	0	1	0	0		1	0	0	0	0	0	0	0	0	0	0	1	0		media\1427802389945.jpg
2	2015-03-31 13:39:05	2015-03-31 18:09:01	2015-03-31	359000000000000	Collins	Mndinda	Vg20	5	1	1	2	23	1	2	2	1		4	1	0	5	3	0	0	0	0	0		1	0	0	0	0	0	0	0	0	0	0	0	0
2	2015-03-31 13:48:50	2015-03-31 18:27:05	2015-03-31	360000000000000	Kalua	Mndinda	Vg20	22	2	3	2	72	1	1	2	1		0	0	2	2	3	0	0	0	0	0		1	0	0	0	0	0	0	0	0	0	0	0	0
2	2015-03-31 13:49:07	2015-03-31 18:26:36	2015-03-31	356000000000000	Maureen	Mndinda	Vg26	17	1	1	2	24	1	3	1	1		3	1	0	4	3	0	0	0	0	0		1	0	0	0	0	0	0	0	0	0	0	0	0
2	2015-03-31 13:59:13	2015-03-31 18:28:32	2015-03-31	356000000000000	Halima	Mndinda	Vg17	7	1	1	2	55	1	1	1	1		0	2	2	4	3	0	0	0	0	0		1	0	0	0	0	0	0	0	0	0	0	0	0
2	2015-03-31 14:12:59	2015-03-31 18:12:12	2015-03-31	359000000000000	Phonex	Mndinda	Vg34	11	1	1	1	81	1	1	1	1		0	2	2	4	3	0	0	1	0	0		1	0	0	0	0	0	0	0	0	0	0	0	0
2	2015-03-31 14:21:01	2015-03-31 18:12:25	2015-03-31	359000000000000	Phonex	Mndinda	Vg34	11	3	5	1	18	1	4	2	1		0	2	2	4	3	0	0	0	0	0		1	0	0	0	0	0	0	0	0	0	0	0	0
2	2015-03-31 14:23:47	2015-03-31 18:12:38	2015-03-31	359000000000000	Phonex	Mndinda	Vg34	11	4	5	2	16	1	4	2	1		0	2	2	4	3	0	0	0	0	0		1	0	0	0	0	0	0	0	0	0	0	0	0
2	2015-03-31 14:43:38	2015-03-31 18:12:58	2015-03-31	359000000000000	Phonex	Mndinda	Vg34	2	1	1	1	60	1	2	2	1		0	0	1	1	3	0	0	0	0	0		1	0	0	0	0	0	0	0	0	0	0	0	0
2	2015-03-31 15:00:10	2015-03-31 18:55:04	2015-03-31	359000000000000	Gausi	Mndinda	Vg18	1	2	3	2	53	1	1	1	1		3	2	2	7	3	0	0	0	0	0		1	0	0	0	0	0	0	0	0	0	0	1	0		media\1427807028592.jpg
2	2015-03-31 15:06:03	2015-03-31 18:38:14	2015-03-31	360000000000000	Patrick	Mndinda	Vg18	1	4	5	2	15	1	4	2	1		3	2	2	7	3	0	0	0	0	0		1	0	0	0	0	0	0	0	0	0	0	0	0
2	2015-03-31 15:07:00	2015-03-31 18:55:27	2015-03-31	359000000000000	Gausi	Mndinda	Vg8	1	3	5	2	18	1	1	2	5		3	2	2	7	3	0	0	0	0	0		1	0	0	0	0	0	0	0	0	0	0	0	0
2	2015-03-31 15:11:48	2015-03-31 18:23:16	2015-03-31	359000000000000	Valens	Mndinda	Vg17	17	1	1	1	35	1	1	3	1		2	2	0	4	3	0	0	0	0	0		1	0	0	0	0	0	0	0	0	0	0	1	0		media\1427807846960.jpg	media\1427807866735.jpg
2	2015-03-31 15:15:00	2015-03-31 18:13:33	2015-03-31	359000000000000	Phonex	Mndinda	Vg34	3	1	1	1	21	1	1	3	1		1	2	0	3	3	0	0	0	0	0		1	0	0	0	0	0	0	0	0	0	0	0	0
2	2015-03-31 15:17:35	2015-03-31 18:13:54	2015-03-31	359000000000000	Phonex	Mndinda	Vg34	3	2	3	2	21	1	1	2	1		1	2	0	3	3	0	0	0	0	0		1	0	0	0	0	0	0	0	0	0	0	0	0
2	2015-03-31 15:19:10	2015-03-31 18:23:29	2015-03-31	359000000000000	Valens	Mndinda	Vg17	17	2	3	2	24	1	1	2	1		2	2	0	4	3	0	0	0	0	0		1	0	0	0	0	0	0	0	0	0	0	0	0
2	2015-04-02 10:43:14	2015-04-02 20:12:36	2015-04-02	360000000000000	Kalua	Mndinda	Vg22	24	2	1	1	48	1	1	2	1		5	2	2	9	3	0	0	0	0	0		1	0	0	0	0	0	0	0	0	0	0	0	0
2	2015-04-02 10:44:10	2015-04-02 17:25:20	2015-04-02	356000000000000	Halima	Mndinda	Vg40	29	2	1	1	46	1	1	1	1		4	4	1	9	3	0	0	0	0	0		1	0	0	0	0	0	0	0	0	0	0	0	0
2	2015-04-02 10:51:44	2015-04-02 19:53:41	2015-04-02	358000000000000	Dalitso	Mndinda	Vg22	10	1	1	1	46	1	1	1	1		6	1	2	9	3	0	0	0	0	0		1	0	0	0	0	0	0	0	0	0	0	0	0
2	2015-04-02 10:52:43	2015-04-02 17:25:49	2015-04-02	356000000000000	Halima	Mndinda	Vg40	26	2	1	1	30	1	1	2	1		2	2	0	4	3	0	1	0	0	1	Chest pain	1	0	0	0	0	0	0	0	0	0	0	0	0
2	2015-04-02 11:00:34	2015-04-02 17:26:06	2015-04-02	356000000000000	Halima	Mndinda	Vg40	22	3	5	1	32	1	4	2	1		1	3	2	6	3	0	0	0	0	0		1	0	0	0	0	0	0	0	0	0	0	0	0
2	2015-04-02 11:07:01	2015-04-02 19:55:10	2015-04-02	358000000000000	Dalitso	Mndinda	Vg22	10	3	5	2	18	1	4	2	5		6	1	2	9	3	0	0	0	0	0		1	0	0	0	0	0	0	0	0	0	0	0	0
2	2015-04-02 11:09:56	2015-04-02 17:26:21	2015-04-02	356000000000000	Halima	Mndinda	Vg40	11	2	1	1	55	1	1	2	1		3	0	2	5	3	0	0	1	1	0		1	0	0	0	0	0	0	0	0	0	0	0	0
2	2015-04-02 11:12:06	2015-04-02 17:07:52	2015-04-02	359000000000000	Alex	Mndinda	Vg14	19	1	3	2	21	1	1	2	1		1	2	0	3	3	0	0	0	0	0		1	0	0	0	0	0	0	0	0	0	0	0	0
2	2015-04-02 11:26:08	2015-04-02 17:12:23	2015-04-02	358000000000000	Francis	Mndinda	Vg5	4	1	1	1	41	1	1	2	1		4	2	1	7	3	0	0	0	0	0		1	0	0	0	0	0	0	0	0	0	0	0	0
2	2015-04-02 11:30:23	2015-04-02 17:21:49	2015-04-02	359000000000000	Phonex	Mndinda	Vg34	21	1	1	1	52	1	1	2	1		3	0	2	5	3	0	0	0	0	0		1	0	0	0	0	0	0	0	0	0	0	1	0		media\1427967506204.jpg
2	2015-04-02 11:32:59	2015-04-02 17:08:23	2015-04-02	359000000000000	Alex	Mndinda	Vg14	9	3	5	2	15	1	1	2	1		2	2	2	6	3	0	0	0	0	0		1	0	0	0	0	0	0	0	0	0	0	0	0
2	2015-04-02 11:39:06	2015-04-02 17:22:01	2015-04-02	359000000000000	Phonex	Mndinda	Vg34	21	2	3	2	50	1	1	1	1		3	0	2	5	3	0	0	0	0	0		1	0	0	0	0	0	0	0	0	0	0	0	0
2	2015-04-02 11:39:36	2015-04-02 17:08:35	2015-04-02	359000000000000	Alex	Mndinda	Vg14	9	1	3	2	53	1	1	1	1		2	2	2	6	3	0	0	0	0	0		1	0	0	0	0	0	0	0	0	0	0	0	0
2	2015-04-02 11:39:40	2015-04-02 17:30:33	2015-04-02	359000000000000	Valens	Mndinda	Vg15	18	1	1	2	45	1	2	2	1		5	1	1	7	3	0	0	0	0	0		1	0	0	0	0	0	0	0	0	0	0	0	0
2	2015-04-02 11:41:29	2015-04-02 17:13:41	2015-04-02	358000000000000	Francis	Mndinda	Vg5	7	2	3	2	51	1	1	1	1		4	0	2	6	3	0	0	0	0	0		1	0	0	0	0	0	0	0	0	0	0	0	0
2	2015-04-02 11:57:33	2015-04-02 20:15:39	2015-04-02	360000000000000	Kalua	Mndinda	Vg25	12	2	3	2	20	1	1	2	1		2	2	0	4	3	0	0	0	1	0		1	0	0	0	0	0	0	0	0	0	0	0	0
2	2015-04-02 11:58:27	2015-04-02 17:30:46	2015-04-02	359000000000000	Valens	Mndinda	Vg15	18	5	5	2	28	1	2	2	1		5	1	1	7	3	0	0	0	0	0		1	0	0	0	0	0	0	0	0	0	0	0	0
2	2015-04-02 11:59:25	2015-04-02 17:14:03	2015-04-02	358000000000000	Francis	Mndinda	Vg5	10	1	1	1	33	1	2	2	1		0	1	0	1	3	0	0	0	0	0		1	0	0	0	0	0	0	0	0	0	0	0	0
2	2015-04-02 12:07:23	2015-04-02 19:10:09	2015-04-02	359000000000000	Collins	Mndinda	Vg28	14	1	3	2	43	1	1	2	1		5	1	2	8	3	0	0	0	0	0		1	0	0	0	0	0	0	0	0	0	0	0	0
2	2015-04-02 12:09:22	2015-04-02 19:56:45	2015-04-02	358000000000000	Dalitso	Mndinda	Vg25	14	1	1	1	47	1	1	2	1		6	1	1	8	3	0	0	0	0	0		1	0	0	0	0	0	0	0	0	0	0	0	0
2	2015-04-02 12:12:54	2015-04-02 19:13:53	2015-04-02	359000000000000	Collins	Mndinda	Vg28	14	2	1	1	52	1	1	2	1		5	1	2	8	3	0	0	0	0	0		1	0	0	0	0	0	0	0	0	0	0	0	0
2	2015-04-02 12:14:56	2015-04-02 19:55:00	2015-04-02	359000000000000	Gausi	Mndinda	Vg28	11	1	1	1	55	1	1	2	1		1	1	2	4	3	0	0	0	0	0		1	0	0	0	0	0	0	0	0	0	0	0	0
2	2015-04-02 12:16:26	2015-04-02 17:22:48	2015-04-02	356000000000000	Maureen	Mndinda	Vg11	12	2	3	2	26	1	1	3	1		1	3	0	4	3	0	0	0	0	0		1	0	0	0	0	0	0	0	0	0	0	0	0
2	2015-04-02 12:17:51	2015-04-02 19:55:17	2015-04-02	359000000000000	Gausi	Mndinda	Vg28	11	2	5	1	45	1	4	1	1		1	1	2	4	3	0	0	0	0	0		1	0	0	0	0	0	0	0	0	0	0	0	0
2	2015-04-02 12:19:22	2015-04-02 17:22:19	2015-04-02	359000000000000	Phonex	Mndinda	Vg34	14	2	3	2	22	1	1	2	1		0	2	0	2	3	0	0	0	0	0		1	0	0	0	0	0	0	0	0	0	0	0	0
2	2015-04-02 12:19:30	2015-04-02 20:23:56	2015-04-02	360000000000000	Kalua	Mndinda	Vg25	9	1	3	2	23	1	1	2	1		2	2	0	4	3	0	0	0	1	0		1	0	0	0	0	0	0	0	0	0	0	0	0
2	2015-04-02 12:24:17	2015-04-02 17:22:31	2015-04-02	359000000000000	Phonex	Mndinda	Vg34	14	1	1	1	24	1	1	3	1		0	2	0	2	3	0	0	0	0	0		1	0	0	0	0	0	0	0	0	0	0	0	0
2	2015-04-02 12:28:14	2015-04-02 19:15:43	2015-04-02	359000000000000	Collins	Mndinda	Vg28	2	1	1	2	37	1	2	2	1		2	3	0	5	3	0	0	0	0	0		1	0	0	0	0	0	0	0	0	0	0	0	0
2	2015-04-02 12:31:42	2015-04-02 17:24:20	2015-04-02	356000000000000	Maureen	Mndinda	Vg11	16	2	1	1	37	1	1	1	1		5	4	0	9	3	0	0	0	0	0		1	0	0	0	0	0	0	0	0	0	0	0	0
2	2015-04-02 12:38:30	2015-04-02 19:36:39	2015-04-02	360000000000000	Patrick	Mndinda	Vg28	20	2	3	2	35	1	1	2	1		2	2	1	5	3	0	0	0	0	0		1	0	0	0	0	0	0	0	0	0	0	0	0
2	2015-04-02 12:43:08	2015-04-02 19:56:03	2015-04-02	359000000000000	Gausi	Mndinda	Vg28	23	2	3	2	41	1	1	1	1		4	2	2	8	3	0	0	0	0	0		1	0	0	0	0	0	0	0	0	0	0	0	0
2	2015-04-02 12:46:41	2015-04-02 19:56:22	2015-04-02	359000000000000	Gausi	Mndinda	Vg28	23	3	5	1	23	1	1	2	1		4	2	2	8	3	0	0	0	0	0		1	0	0	0	0	0	0	0	0	0	0	0	0
2	2015-04-02 12:49:11	2015-04-02 19:56:38	2015-04-02	359000000000000	Gausi	Mndinda	Vg28	23	4	5	1	16	1	4	2	1		4	2	2	8	3	0	0	0	0	0		1	0	0	0	0	0	0	0	0	0	0	0	0
2	2015-04-02 12:55:57	2015-04-02 19:40:30	2015-04-02	360000000000000	Saukila	Mndinda	Vg28	7	3	5	2	21	1	4	3	5		3	2	2	7	3	0	0	0	0	0		1	0	0	0	0	0	0	0	0	0	0	0	0
2	2015-04-02 12:59:40	2015-04-02 20:04:24	2015-04-02	360000000000000	Eddah	Mndinda	Vg28	6	2	3	2	25	1	1	2	1		2	3	0	5	3	0	0	0	0	0		1	0	0	0	0	0	0	0	0	0	0	0	0
2	2015-04-02 13:01:46	2015-04-02 19:40:51	2015-04-02	360000000000000	Saukila	Mndinda	Vg28	7	4	5	2	15	1	4	2	5		3	2	2	7	3	0	0	0	0	0		1	0	0	0	0	0	0	0	0	0	0	0	0
2	2015-04-02 13:04:22	2015-04-02 20:05:34	2015-04-02	360000000000000	Eddah	Mndinda	Vg28	6	3	6	2	16	1	4	2	5		2	3	0	5	3	0	0	0	0	0		1	0	0	0	0	0	0	0	0	0	0	0	0
2	2015-04-02 13:07:20	2015-04-02 17:22:43	2015-04-02	359000000000000	Phonex	Mndinda	Vg34	18	1	1	1	34	1	1	2	3		4	2	0	6	3	0	0	0	0	0		1	0	0	0	0	0	0	0	0	0	0	0	0
2	2015-04-02 13:11:15	2015-04-02 17:22:57	2015-04-02	359000000000000	Phonex	Mndinda	Vg34	18	2	3	2	29	1	1	2	3		4	2	0	6	3	0	0	0	0	0		1	0	0	0	0	0	0	0	0	0	0	0	0
2	2015-04-02 13:30:33	2015-04-02 17:09:40	2015-04-02	359000000000000	Alex	Mndinda	Vg35	18	1	1	1	48	1	1	1	1		3	1	1	5	3	0	0	0	0	0		1	0	0	0	0	0	0	0	0	0	0	0	0
2	2015-04-02 13:37:37	2015-04-02 17:27:22	2015-04-02	356000000000000	Halima	Mndinda	Vg44	7	2	3	2	19	1	1	2	1		1	2	0	3	3	0	0	0	0	0		1	0	0	0	0	0	0	0	0	0	0	0	0
2	2015-04-02 13:42:18	2015-04-02 17:27:43	2015-04-02	356000000000000	Halima	Mndinda	Vg44	6	2	1	1	80	1	1	1	1		0	0	2	2	3	0	0	1	1	0		1	0	0	0	0	0	0	0	0	0	0	0	0
2	2015-04-02 13:49:35	2015-04-02 20:32:42	2015-04-02	360000000000000	Kalua	Mndinda	Vg49	21	1	1	1	35	1	1	2	1		2	2	0	4	3	0	0	0	0	0		1	0	0	0	0	0	0	0	0	0	0	0	0
2	2015-04-02 13:52:04	2015-04-02 17:27:56	2015-04-02	356000000000000	Halima	Mndinda	Vg44	5	2	1	1	32	1	1	3	2		3	2	0	5	3	0	0	0	0	0		1	0	0	0	0	0	0	0	0	0	0	0	0
2	2015-04-02 13:54:38	2015-04-02 20:33:09	2015-04-02	360000000000000	Kalua	Mndinda	Vg49	21	2	3	2	31	1	1	2	1		2	2	0	4	3	0	0	0	0	0		1	1	0	0	0	0	1	0	0	0	0	0	0		media\1427975813111.jpg	media\1427975842750.jpg	media\1427975873673.jpg
2	2015-04-02 13:59:10	2015-04-02 19:59:49	2015-04-02	358000000000000	Dalitso	Mndinda	Vg25	19	1	1	1	48	1	1	2	1		5	1	1	7	3	0	0	0	1	0		1	0	0	0	0	0	0	0	0	0	0	0	0
2	2015-04-02 14:07:05	2015-04-02 20:00:18	2015-04-02	358000000000000	Dalitso	Mndinda	Vg25	19	2	3	2	31	1	1	2	1		5	1	1	7	3	0	0	0	0	0		1	0	0	0	0	0	0	0	0	0	0	0	0
2	2015-04-02 14:14:22	2015-04-02 17:15:44	2015-04-02	358000000000000	Francis	Mndinda	Vg5	24	2	5	1	22	1	4	3	1		0	1	1	2	3	0	0	1	0	1	Chest pain	1	0	0	0	0	0	0	0	0	0	0	0	0
2	2015-04-02 14:19:17		2015-04-02	360000000000000	Kalua	Mndinda	Vg49	18	1	1	1	45	1	1	2	1		6	1	2	9	3	0	0	0	0	0		1	0	0	0	0	0	0	0	0	0	0	0	0
2	2015-04-02 15:15:06	2015-04-02 20:07:34	2015-04-02	360000000000000	Kalua	Mndinda	Vg50	23	2	3	2	57	1	1	2	1		0	1	2	3	3	0	0	0	1	0		1	0	0	0	0	0	0	0	0	0	0	0	0
2	2015-04-02 15:20:27	2015-04-02 20:06:33	2015-04-02	360000000000000	Eddah	Mndinda	Vg50	23	1	1	1	63	1	1	1	1		0	1	2	3	3	0	0	0	0	0		1	0	0	0	0	0	0	0	0	0	0	0	0
2	2015-04-02 15:20:49	2015-04-02 19:20:36	2015-04-02	359000000000000	Collins	Mndinda	Vg50	29	2	3	2	39	1	1	1	1		4	1	1	6	3	0	1	0	0	0		1	0	0	0	0	0	0	0	0	0	0	0	0
2	2015-04-02 15:23:53	2015-04-02 20:02:10	2015-04-02	358000000000000	Dalitso	Mndinda	Vg50	25	1	1	1	30	1	1	1	1		3	2	0	5	3	0	0	0	0	0		1	0	0	0	0	0	0	0	0	0	0	0	0
2	2015-04-02 15:35:05	2015-04-02 20:02:55	2015-04-02	358000000000000	Dalitso	Mndinda	Vg50	25	2	3	2	23	1	1	2	1		3	2	0	5	3	0	0	0	0	0		1	0	0	0	0	0	0	0	0	0	0	0	0
2	2015-04-02 17:07:17	2015-04-02 19:40:50	2015-04-02	360000000000000	Patrick	Mndinda	Vg47	1	1	1	1	39	1	1	2	1		2	2	0	4	3	0	0	0	0	0		1	0	0	0	0	0	0	0	0	0	0	0	0
2	2015-04-02 17:18:21	2015-04-02 19:44:20	2015-04-02	360000000000000	Patrick	Mndinda	Vg47	7	4	5	1	17	1	4	2	1		6	2	2	10	3	0	0	0	0	0		1	0	0	0	0	0	0	0	0	0	0	0	0
2	2015-01-21 10:23:54	2015-01-27 18:30:16	2015-01-21	359000000000000	Collins	Mkhuzi	Vg48	1	1	1	1	26	1	1	3	1		0	2	0	2	3	0	1	1	0	0		1	0	0	0	0	0	0	0	0	0	0	0	0
2	2015-01-21 10:28:48	2015-01-21 17:28:19	2015-01-21	359000000000000	Collins	Mkhuzi	Vg48	1	2	3	2	23	1	1	2	1		0	2	0	2	3	0	0	0	0	0		1	0	0	0	0	1	0	0	0	0	0	1	0		media\1421829081423.jpg
2	2015-01-21 10:46:10	2015-01-21 20:22:21	2015-01-21	358000000000000	Dalitso	Bowe	Vg105	33	2	3	2	20	1	1	3	1		1	2	0	3	3	0	0	0	0	0		1	0	0	0	0	0	0	0	0	0	0	0	0
2	2015-01-21 10:48:57	2015-01-21 20:00:26	2015-01-21	360000000000000	Kalua	BOWE	Vg109	20	1	1	1	38	1	1	3	2		0	2	0	2	3	0	0	0	0	0		1	0	0	0	0	0	0	0	0	0	0	0	0
2	2015-01-21 10:57:58	2015-01-26 15:53:45	2015-01-21	356000000000000	Maureen	Mkhuzi	Vg41	29	2	3	2	22	1	1	3	1		2	2	0	4	3	0	0	0	0	0		1	0	0	0	0	0	0	0	0	0	0	0	0
2	2015-01-21 11:08:07	2015-01-21 20:07:21	2015-01-21	359000000000000	Alex	Bowe	Vg63	6	1	1	1	50	1	1	1	1		2	0	2	4	3	0	0	0	0	0		1	0	0	0	0	0	0	0	0	0	0	1	0		media\1421831661382.jpg
2	2015-01-21 11:11:40	2015-01-21 19:01:45	2015-01-21	359000000000000	Gausi	Bowe	Vg47	65	2	3	2	38	1	1	2	1		5	1	1	7	3	0	0	0	0	0		1	0	0	0	0	0	0	0	0	0	0	0	0
2	2015-01-21 11:19:25	2015-01-21 20:08:07	2015-01-21	359000000000000	Alex	Bowe	Vg63	10	1	3	2	27	1	1	1	1		3	2	0	5	3	0	0	0	0	0		1	0	0	0	0	0	0	0	0	0	0	0	0
2	2015-01-21 11:19:35	2015-01-21 19:03:47	2015-01-21	360000000000000	Eddah	Bowe	Vg32	38	1	1	1	71	1	1	2	1		0	3	2	5	3	0	0	0	0	0		1	0	0	0	0	1	0	0	0	1	0	1	0		media\1421832544241.jpg	media\1421832574928.jpg
2	2015-01-21 11:29:05	2015-01-21 20:25:29	2015-01-21	358000000000000	Dalitso	Bowe	Vg105	19	2	5	2	47	1	2	3	2		3	4	2	9	3	0	0	0	0	0		1	0	0	0	0	0	0	0	0	0	0	0	0
2	2015-01-21 11:29:27	2015-01-21 20:45:57	2015-01-21	359000000000000	Valens	Bowe	Vg91	46	2	2	2	34	2	1	2	2		3	3	0	6	3	0	0	0	0	0		1	0	0	0	0	0	0	0	0	0	0	0	0
2	2015-01-21 11:33:23	2015-01-21 17:28:56	2015-01-21	359000000000000	Collins	Mkhuzi	Vg4	15	2	1	1	47	1	1	1	1		5	2	2	9	3	0	0	0	0	0		1	0	0	0	0	0	0	0	0	0	0	0	0
2	2015-01-21 11:34:42	2015-01-21 20:26:19	2015-01-21	358000000000000	Dalitso	Bowe	Vg105	19	3	5	2	38	1	2	3	1		3	4	2	9	3	0	0	0	0	0		1	0	0	0	0	0	0	0	0	0	0	0	0
2	2015-01-21 11:38:15	2015-01-21 19:04:12	2015-01-21	359000000000000	Gausi	Bowe	Vg47	70	2	5	2	27	1	2	2	1		4	1	2	7	3	0	0	0	0	0		1	0	0	0	0	0	0	0	0	0	0	0	0
2	2015-01-21 11:39:12	2015-01-21 20:27:17	2015-01-21	358000000000000	Dalitso	Bowe	Vg105	19	4	5	1	15	1	4	3	5		3	4	2	9	3	0	0	0	0	0		1	0	0	0	0	0	0	0	0	0	0	0	0
2	2015-01-21 11:41:27	2015-01-21 19:05:06	2015-01-21	359000000000000	Gausi	Bowe	Vg47	70	7	3	2	55	1	1	2	1		4	1	2	7	3	0	0	0	0	0		1	0	0	0	0	0	0	0	0	0	0	0	0
2	2015-01-21 11:43:34	2015-01-21 20:47:45	2015-01-21	359000000000000	Valens	Bowe	Vg91	46	6	6	1	29	2	4	3	2		3	3	0	6	3	0	0	0	0	0		1	0	0	0	0	0	0	0	0	0	0	0	0
2	2015-01-21 11:51:35	2015-01-21 19:03:58	2015-01-21	360000000000000	Eddah	Bowe	Vg32	38	2	3	2	61	1	1	1	1		0	3	2	5	3	0	0	0	0	0		1	0	0	0	0	0	0	0	0	0	0	0	0
2	2015-01-21 11:54:26	2015-01-21 19:04:13	2015-01-21	360000000000000	Eddah	Bowe	Vg32	38	3	6	1	18	1	4	3	5		0	3	2	5	3	0	0	0	0	0		1	0	0	0	0	0	0	0	0	0	0	0	0
2	2015-01-21 11:59:32	2015-01-21 19:06:03	2015-01-21	359000000000000	Gausi	Bowe	Vg47	77	1	1	1	52	1	1	2	1		6	1	2	9	3	0	0	0	0	0		1	0	0	0	0	0	0	0	0	0	0	0	0
2	2015-01-21 12:04:34	2015-01-21 19:05:01	2015-01-21	360000000000000	Eddah	Bowe	Vg32	38	5	6	1	15	1	4	2	5		0	3	2	5	3	0	0	0	0	0		1	0	0	0	0	0	0	0	0	0	0	0	0
2	2015-01-21 12:07:18	2015-01-21 19:38:26	2015-01-21	358000000000000	Francis	Bowe	Vg114	38	1	3	2	25	1	1	2	1		3	2	0	5	3	0	0	0	0	0		1	0	0	0	0	0	0	0	0	0	0	0	0
2	2015-01-21 12:10:50	2015-01-21 17:07:20	2015-01-21	359000000000000	Phonex	Mkhuzi	Vg103	8	1	1	1	42	1	1	2	1		5	2	2	9	3	0	0	0	0	0		1	0	0	0	0	0	0	0	0	0	0	0	0
2	2015-01-21 12:11:52	2015-01-21 19:06:30	2015-01-21	359000000000000	Gausi	Bowe	Vg47	77	2	3	2	50	1	1	2	1		6	1	2	9	3	0	0	0	0	0		1	0	0	0	0	0	0	0	0	0	0	0	0
2	2015-01-21 12:12:42	2015-01-21 19:39:01	2015-01-21	358000000000000	Francis	Bowe	Vg114	38	2	1	1	29	1	1	2	1		3	2	0	5	3	0	0	0	0	0		1	0	0	0	0	0	0	0	0	0	0	0	0
2	2015-01-21 12:13:04	2015-01-21 20:48:02	2015-01-21	359000000000000	Valens	Bowe	Vg91	46	1	1	1	39	2	1	2	2		3	3	0	6	3	0	0	0	0	0		1	0	0	0	0	0	0	0	0	0	0	0	0
2	2015-01-21 12:18:40	2015-01-21 20:11:01	2015-01-21	360000000000000	Kalua	BOWE	Vg109	15	1	1	1	62	1	1	3	1		0	2	2	4	3	0	0	0	0	0		1	0	0	0	0	0	0	0	0	0	0	0	0
2	2015-01-21 12:23:31	2015-01-21 19:05:28	2015-01-21	360000000000000	Eddah	Bowe	Vg32	47	1	1	2	61	1	3	1	1		0	2	1	3	3	0	0	0	0	1	Heart palpitation	1	0	0	0	0	0	0	0	0	0	0	0	0
2	2015-01-21 12:24:57	2015-01-21 18:43:23	2015-01-21	356000000000000	Halima	Bowe	Vg67	20	1	5	1	36	1	1	2	1		2	2	0	4	3	0	0	0	0	0		1	0	0	0	0	0	0	0	0	0	0	0	0
2	2015-01-21 12:28:21	2015-01-21 19:41:05	2015-01-21	358000000000000	Francis	Bowe	Vg114	37	2	5	2	16	1	2	2	1		3	1	1	5	3	0	0	0	0	0		1	0	0	0	0	0	0	0	0	0	0	0	0
2	2015-01-21 12:29:34	2015-01-21 19:05:39	2015-01-21	360000000000000	Eddah	Bowe	Vg32	47	2	6	1	17	1	4	1	5		0	2	1	3	3	0	0	0	0	0		1	0	0	0	0	0	0	0	0	0	0	0	0
2	2015-01-21 12:32:11	2015-01-21 18:44:03	2015-01-21	356000000000000	Halima	Bowe	Vg67	20	2	3	2	25	1	1	2	1		2	2	0	4	3	0	0	0	0	0		1	0	0	0	0	0	0	0	0	0	0	0	0
2	2015-01-21 12:32:45	2015-01-21 19:07:20	2015-01-21	359000000000000	Gausi	Bowe	Vg47	82	1	1	1	50	1	1	2	1		4	0	2	6	3	0	0	0	0	0		1	0	0	0	0	0	0	0	0	0	0	0	0
2	2015-01-21 12:32:45	2015-01-21 18:33:22	2015-01-21	360000000000000	Patrick	Bowe	Vg56	25	3	4	2	38	1	1	2	1		2	2	2	6	3	0	0	0	0	0		1	0	0	0	0	0	0	0	0	0	0	0	0
2	2015-01-21 12:34:37	2015-01-21 20:17:32	2015-01-21	359000000000000	Alex	Bowe	Vg63	25	2	3	2	21	1	1	2	1		2	2	0	4	3	0	0	0	0	0		1	0	0	0	0	0	0	0	0	0	0	0	0
2	2015-01-21 12:37:38	2015-01-21 20:32:24	2015-01-21	358000000000000	Dalitso	Bowe	Vg105	4	1	1	1	38	1	1	2	2		5	3	0	8	3	0	0	0	0	0		1	0	0	0	0	0	0	0	0	0	0	0	0
2	2015-01-21 12:38:16	2015-01-27 20:03:26	2015-01-21	359000000000000	Gausi	Bowe	Vg47	82	2	3	2	43	1	1	1	1		4	0	2	6	3	0	0	0	0	0		1	0	0	0	0	0	0	0	0	0	0	0	0
2	2015-01-21 12:39:36	2015-01-21 18:34:14	2015-01-21	360000000000000	Patrick	Bowe	Vg56	25	4	6	1	15	1	4	1	1		2	2	2	6	3	0	0	0	0	0		1	0	0	0	0	0	0	0	0	0	0	0	0
2	2015-01-21 12:41:29	2015-01-21 20:49:01	2015-01-21	359000000000000	Valens	Bowe	Vg91	57	2	2	2	32	2	1	2	2		5	1	1	7	3	0	0	0	0	0		1	0	0	0	0	0	0	0	0	0	0	0	0
2	2015-01-21 12:45:59		2015-01-21	358000000000000	Dalitso	Bowe	Vg105	4	2	3	2	38	1	1									0	0	0	0	0		1	0	0	0	0	0	0	0	0	0	0	0	0
2	2015-01-21 12:47:36	2015-01-21 20:19:06	2015-01-21	359000000000000	Alex	Bowe	Vg63	29	1	1	1	34	1	1	2	1		4	2	0	6	3	0	0	0	0	0		1	0	0	0	0	0	0	0	0	0	0	0	0
2	2015-01-21 12:50:27	2015-01-21 18:46:40	2015-01-21	356000000000000	Halima	Bowe	Vg67	27	1	1	2	46	1	2	2	1		2	1	1	4	3	0	0	0	0	0		1	0	0	0	0	0	0	0	0	0	0	0	0
2	2015-01-21 12:50:51	2015-01-21 19:06:57	2015-01-21	360000000000000	Eddah	Bowe	Vg32	52	2	3	2	21	1	1	2	1		2	2	0	4	3	0	0	0	0	0		1	0	0	0	0	0	0	0	0	0	0	0	0
2	2015-01-21 12:51:06	2015-01-21 20:19:23	2015-01-21	359000000000000	Alex	Bowe	Vg63	29	6	3	2	28	1	1	2	1		4	2	0	6	3	0	0	0	0	0		1	0	0	0	0	0	0	0	0	0	0	0	0
2	2015-01-21 12:59:32	2015-01-21 19:44:03	2015-01-21	358000000000000	Francis	Bowe	Vg114	27	1	3	2	22	1	1	2	1		1	2	0	3	3	0	0	0	0	0		1	0	0	0	0	0	0	0	0	0	0	0	0
2	2015-01-21 13:03:42	2015-01-21 18:38:13	2015-01-21	360000000000000	Patrick	Bowe	Vg56	16	2	3	2	40	1	1	1	1		2	3	2	7	3	0	0	0	0	0		1	0	0	0	0	0	0	0	0	0	0	0	0
2	2015-01-21 13:11:42	2015-01-21 20:46:39	2015-01-21	358000000000000	Dalitso	Bowe	Vg105	1	2	1	2	63	1	1	2	1		2	0	1	3	3	0	0	0	0	0		1	0	0	0	0	0	0	0	0	0	0	0	0
2	2015-01-21 13:11:57	2015-01-21 18:47:39	2015-01-21	356000000000000	Halima	Bowe	Vg67	31	1	1	2	38	1	2	2	1		4	2	0	6	3	0	0	0	0	0		1	0	0	0	0	0	0	0	0	0	0	0	0
2	2015-01-21 13:16:13	2015-01-21 17:08:13	2015-01-21	359000000000000	Phonex	Mkhuzi	Vg55	16	1	1	1	42	1	1	3	1		4	1	1	6	3	0	0	0	0	0		1	0	0	0	0	0	0	0	0	0	0	0	0
2	2015-01-21 13:17:27	2015-01-29 19:03:24	2015-01-21	358000000000000	Francis	Bowe	Vg114	20	1	1	1	33	1	1	3	1		2	2	0	4	3	0	0	0	0	0		1	0	0	0	0	0	0	0	0	0	0	0	0
2	2015-01-21 13:23:59	2015-01-21 20:25:48	2015-01-21	359000000000000	Alex	Bowe	Vg63	33	3	5	2	15	1	4	2	1		4	5	1	10	3	0	0	0	0	0		1	0	0	0	0	0	0	0	0	0	0	0	0
2	2015-01-21 13:26:58	2015-01-21 19:46:36	2015-01-21	358000000000000	Francis	Bowe	Vg114	20	2	3	2	28	1	1	2	1		2	2	0	4	3	0	0	0	0	0		1	0	0	0	0	0	0	0	0	0	0	0	0
2	2015-01-21 13:29:03	2015-01-21 20:52:05	2015-01-21	359000000000000	Valens	Bowe	Vg91	50	2	2	2	24	2	1	2	2		3	2	0	5	3	0	0	0	0	0		1	0	0	0	0	1	0	0	0	0	0	1	0		media\1421840014405.jpg	media\1421840040211.jpg
2	2015-01-21 13:31:06	2015-01-21 18:54:11	2015-01-21	356000000000000	Halima	Bowe	Vg67	38	1	1	2	79	1	3	2	1		0	0	1	1	3	0	0	0	0	0		1	0	0	0	0	0	0	0	0	0	0	0	0
2	2015-01-21 13:35:32	2015-01-21 17:29:31	2015-01-21	359000000000000	Collins	Mkhuzi	Vg58	1	4	1	1	62	1	1	2	1		0	3	2	5	3	0	1	0	0	0		1	0	0	0	0	0	0	0	0	0	0	0	0
2	2015-01-21 13:37:49	2015-01-21 19:08:38	2015-01-21	360000000000000	Eddah	Bowe	Vg32	26	3	5	1	21	1	4	2	1		2	3	2	7	3	0	0	0	0	0		1	0	0	0	0	0	0	0	0	0	0	0	0
2	2015-01-21 13:42:01	2015-01-21 17:29:45	2015-01-21	359000000000000	Collins	Mkhuzi	Vg58	1	5	3	2	49	1	1	2	1		0	3	2	5	3	0	0	0	0	0		1	0	0	0	0	0	0	0	0	0	0	0	0
2	2015-01-21 13:45:01	2015-01-21 19:08:49	2015-01-21	360000000000000	Eddah	Bowe	Vg32	26	1	1	1	55	1	1	2	1		2	3	2	7	3	0	0	1	1	0		1	0	0	0	0	1	0	0	0	0	0	1	0		media\1421841107256.jpg	media\1421841143342.jpg	media\1421841898236.jpg
2	2015-01-21 13:50:31	2015-01-21 20:29:12	2015-01-21	359000000000000	Alex	Bowe	Vg63	27	2	3	2	18	1	1	2	1		0	2	0	2	3	0	0	0	0	0		1	0	0	0	0	0	0	0	0	0	0	1	0		media\1421841169190.jpg
2	2015-01-21 13:50:53	2015-01-21 18:54:27	2015-01-21	356000000000000	Halima	Bowe	Vg67	29	2	3	2	29	1	1	2	1		2	2	0	4	3	0	0	0	0	0		1	0	0	0	0	0	0	0	0	0	0	0	0
2	2015-01-21 13:51:43	2015-01-21 19:47:49	2015-01-21	358000000000000	Francis	Bowe	Vg114	7	1	1	2	28	1	2	2	2		4	1	0	5	3	0	0	0	0	1	Chest burning	1	0	0	0	0	0	0	0	0	0	0	0	0
2	2015-01-21 13:56:27	2015-01-21 18:54:43	2015-01-21	356000000000000	Halima	Bowe	Vg67	29	1	1	1	35	1	1	1	1		2	2	0	4	3	0	0	0	0	0		1	0	0	0	0	0	0	0	0	0	0	0	0
2	2015-01-21 14:06:58	2015-01-21 17:08:41	2015-01-21	359000000000000	Phonex	Mkhuzi	Vg85	18	6	5	1	17	1	4	2	1		3	3	0	6	3	0	0	0	0	0		1	0	0	0	0	0	0	0	0	0	0	1	0		media\1421842390281.jpg
2	2015-01-21 14:08:03	2015-01-21 18:43:57	2015-01-21	360000000000000	Patrick	Bowe	Vg56	1	1	1	1	31	1	1	3	1		1	2	0	3	3	0	0	0	0	0		1	0	0	0	0	0	0	0	0	0	0	0	0
2	2015-01-21 14:12:36	2015-01-21 18:44:26	2015-01-21	360000000000000	Patrick	Bowe	Vg56	1	2	3	2	30	1	1	3	1		1	2	0	3	3	0	0	0	0	0		1	0	0	0	0	0	0	0	0	0	0	0	0
2	2015-01-21 14:14:42	2015-01-21 17:08:56	2015-01-21	359000000000000	Phonex	Mkhuzi	Vg85	18	2	3	2	33	1	1	2	1		3	3	0	6	3	0	0	0	0	0		1	0	0	0	0	0	0	0	0	0	0	0	0
2	2015-01-21 14:17:57	2015-01-21 18:55:44	2015-01-21	356000000000000	Halima	Bowe	Vg67	43	1	1	1	55	1	2	1	1		0	0	1	1	3	0	0	0	0	0		1	0	0	0	0	0	0	0	0	0	0	0	0
2	2015-01-21 14:18:26	2015-01-21 19:48:53	2015-01-21	358000000000000	Francis	Bowe	Vg114	1	1	1	2	72	1	3	2	1		1	0	1	2	3	0	0	0	0	0		1	0	0	0	0	0	0	0	0	0	0	0	0
2	2015-01-21 14:24:06	2015-01-21 20:30:01	2015-01-21	359000000000000	Alex	Bowe	Vg63	20	1	1	1	79	1	1	2	1		2	4	2	8	3	0	0	0	0	0		1	0	0	0	0	0	0	0	0	0	0	0	0
2	2015-01-21 14:25:36	2015-01-21 20:51:27	2015-01-21	358000000000000	Dalitso	Bowe	Vg105	15	2	3	2	46	1	1	2	2		3	3	2	8	3	0	0	0	0	0		1	0	0	0	0	0	0	0	0	0	0	0	0
2	2015-01-21 14:26:20	2015-01-21 19:09:54	2015-01-21	360000000000000	Eddah	Bowe	Vg32	26	2	3	2	52	1	1	1	1		2	3	2	7	3	0	0	1	1	1	Heart palpitation	1	0	0	0	0	0	0	0	0	0	0	0	0
2	2015-01-21 14:27:54	2015-01-21 17:09:51	2015-01-21	359000000000000	Phonex	Mkhuzi	Vg85	8	2	3	2	46	1	1	2	1		1	3	2	6	3	0	0	0	0	0		1	0	0	0	0	0	0	0	0	0	0	0	0
2	2015-01-21 14:30:30	2015-01-21 18:45:27	2015-01-21	360000000000000	Patrick	Bowe	Vg56	62	1	1	1	51	1	1	2	1		0	1	2	3	3	0	0	0	0	0		1	0	0	0	0	0	0	0	0	0	0	0	0
2	2015-01-21 14:36:19	2015-01-21 18:46:03	2015-01-21	360000000000000	Patrick	Bowe	Vg56	62	2	3	2	54	1	1	1	1		0	1	2	3	3	0	0	0	0	0		1	0	0	0	0	0	0	0	0	0	0	0	0
2	2015-01-21 14:36:22	2015-01-21 20:53:15	2015-01-21	358000000000000	Dalitso	Bowe	Vg105	15	4	5	1	15	1	4	2	5		3	3	2	8	3	0	0	0	0	0		1	0	0	0	0	0	0	0	0	0	0	0	0
2	2015-01-21 14:38:58	2015-01-21 20:31:19	2015-01-21	359000000000000	Alex	Bowe	Vg63	20	3	6	1	25	1	4	1	1		2	4	2	8	3	0	0	0	0	0		1	0	0	0	0	0	0	0	0	0	0	1	0		media\1421844140454.jpg
2	2015-01-21 14:43:05	2015-01-21 19:51:18	2015-01-21	358000000000000	Francis	Bowe	Vg114	34	2	3	2	22	1	1	2	1		1	2	0	3	3	0	0	0	0	0		1	0	0	0	0	0	0	0	0	0	0	0	0
2	2015-01-21 14:43:25	2015-01-21 20:53:56	2015-01-21	358000000000000	Dalitso	Bowe	Vg105	15	7	5	1	27	1	4	2	3		3	3	2	8	3	0	0	0	0	0		1	0	0	0	0	0	0	0	0	0	0	0	0
2	2015-01-21 14:46:41	2015-01-21 17:30:55	2015-01-21	359000000000000	Collins	Mkhuzi	Vg52	19	2	1	1	59	1	1	2	1		2	1	2	5	3	0	0	0	0	0		1	0	0	0	0	0	0	0	0	0	0	0	0
2	2015-01-21 14:53:04	2015-01-21 19:15:29	2015-01-21	359000000000000	Gausi	Bowe	Vg29	37	1	1	1	35	1	1	1	1		6	2	0	8	3	0	0	0	0	0		1	0	0	0	0	0	0	0	0	0	0	0	0
2	2015-01-21 14:53:34	2015-01-21 17:16:45	2015-01-21	356000000000000	Maureen	Mkhuzi	Vg52	27	2	3	2	28	1	1	2	1		3	2	0	5	3	0	0	0	0	0		1	0	0	0	0	0	0	0	0	0	0	0	0
2	2015-01-21 14:56:11	2015-01-21 19:11:01	2015-01-21	360000000000000	Eddah	Bowe	Vg32	21	2	3	2	36	1	1	1	1		6	3	1	10	3	0	0	0	0	0		1	0	0	0	0	0	0	0	0	0	0	0	0
2	2015-01-21 14:57:28	2015-01-21 19:16:47	2015-01-21	359000000000000	Gausi	Bowe	Vg29	37	2	3	2	33	1	1	1	1		6	2	0	8	3	0	0	0	0	0		1	0	0	0	0	0	0	0	0	0	0	0	0
2	2015-01-21 14:57:36	2015-01-21 20:55:41	2015-01-21	359000000000000	Valens	Bowe	Vg91	7	2	2	2	28	2	1	2	2		1	2	0	3	3	0	0	0	0	0		1	0	0	0	0	0	0	0	0	0	0	0	0
2	2015-01-21 14:59:35	2015-01-21 17:17:23	2015-01-21	356000000000000	Maureen	Mkhuzi	Vg52	27	1	1	1	30	1	1	2	2		3	2	0	5	3	0	0	0	0	0		1	0	0	0	0	0	0	0	0	0	0	0	0
2	2015-01-21 15:02:51	2015-01-21 20:55:59	2015-01-21	359000000000000	Valens	Bowe	Vg91	7	1	1	1	34	2	1	2	2		1	2	0	3	3	0	0	0	0	0		1	0	0	0	0	0	0	0	0	0	0	0	0
2	2015-01-21 15:04:39	2015-01-21 19:11:50	2015-01-21	360000000000000	Eddah	Bowe	Vg32	21	1	1	1	39	1	1	2	1		6	3	1	10	3	0	0	0	0	0		1	0	0	0	0	0	0	0	0	0	0	0	0
2	2015-01-21 15:05:44	2015-01-21 19:59:45	2015-01-21	360000000000000	Saukila	Bowe	Vg29	14	1	1	1	56	1	1	2	1		2	2	2	6	3	0	0	0	0	0		1	0	0	0	0	0	0	0	0	0	0	0	0
2	2015-01-21 15:08:49	2015-01-21 18:48:23	2015-01-21	360000000000000	Patrick	Bowe	Vg56	45	2	3	2	35	1	1	2	1		4	1	1	6	3	0	0	1	0	0		1	0	0	0	0	0	0	0	0	0	0	0	0
2	2015-01-21 15:14:50	2015-01-21 20:00:31	2015-01-21	360000000000000	Saukila	Bowe	Vg29	14	2	3	2	51	1	1	2	1		2	2	2	6	3	0	0	0	0	0		1	0	0	0	0	0	0	0	0	0	0	0	0
2	2015-01-21 15:28:03	2015-01-21 19:17:49	2015-01-21	359000000000000	Gausi	Bowe	Vg29	13	2	3	2	24	1	1	3	1		1	3	0	4	3	0	0	0	0	0		1	0	0	0	0	0	0	0	0	0	0	0	0
2	2015-01-21 15:28:05	2015-01-21 20:56:40	2015-01-21	359000000000000	Valens	Bowe	Vg91	26	2	1	1	72	2	1	1	2		4	2	2	8	3	0	0	0	0	0		1	0	0	0	0	0	0	0	0	0	0	0	0
2	2015-01-21 15:35:31	2015-01-21 20:55:37	2015-01-21	358000000000000	Dalitso	Bowe	Vg105	5	1	1	2	57	1	2	2	1		1	1	1	3	3	0	0	0	0	0		1	0	0	0	0	0	0	0	0	0	0	0	0
2	2015-01-21 15:39:28	2015-01-21 19:12:52	2015-01-21	360000000000000	Eddah	Bowe	Vg32	22	1	1	1	26	1	1	1	1		2	2	0	4	3	0	0	0	0	0		1	0	0	0	0	0	0	0	0	0	0	0	0
2	2015-01-21 15:43:38	2015-01-21 20:56:22	2015-01-21	358000000000000	Dalitso	Bowe	Vg105	5	3	5	1	33	1	4	3	1		1	1	1	3	3	0	0	0	0	0		1	0	0	0	0	0	0	0	0	0	0	0	0
2	2015-01-21 15:47:20	2015-01-21 19:14:03	2015-01-21	360000000000000	Eddah	Bowe	Vg32	22	2	3	2	24	1	1	1	1		2	2	0	4	3	0	1	1	0	0		1	0	0	0	0	0	0	0	0	0	0	0	0
2	2015-01-21 15:50:00	2015-01-21 21:03:06	2015-01-21	359000000000000	Valens	Bowe	Vg91	17	2	3	2	26	2	1	2	1		1	2	0	3	3	0	0	0	0	0		1	0	0	0	0	0	0	0	0	0	0	0	0
2	2015-01-21 15:52:23	2015-01-21 18:56:15	2015-01-21	356000000000000	Halima	Bowe	Vg53	37	2	1	2	40	1	1	3	4		2	2	2	6	3	0	0	0	0	1	Chest pain	1	0	0	0	0	0	0	0	0	0	0	0	0
2	2015-01-21 16:07:29	2015-01-21 19:30:45	2015-01-21	359000000000000	Gausi	Bowe	Vg29	23	2	3	2	23	1	1	1	1		2	2	0	4	3	0	0	0	0	0		1	0	0	0	0	0	0	0	0	0	0	0	0
2	2015-01-21 16:18:57	2015-01-21 18:56:31	2015-01-21	356000000000000	Halima	Bowe	Vg53	37	1	1	1	46	1	1	3	4		2	2	2	6	3	0	0	0	0	0		1	0	0	0	0	0	0	0	0	0	0	0	0
2	2015-01-21 16:27:03	2015-01-21 19:14:33	2015-01-21	360000000000000	Eddah	Bowe	Vg32	69	1	1	1	62	1	1	1	1		2	2	2	6	3	0	0	0	0	0		1	0	0	0	0	0	0	0	0	0	0	0	0
2	2015-01-21 16:30:37	2015-01-21 19:14:48	2015-01-21	360000000000000	Eddah	Bowe	Vg32	69	2	3	2	60	1	1	1	1		2	2	2	6	3	0	0	0	0	0		1	0	0	0	0	0	0	0	0	0	0	0	0
2	2015-01-21 16:36:59	2015-01-21 19:15:07	2015-01-21	360000000000000	Eddah	Bowe	Vg32	69	4	5	2	28	1	4	3	1		2	2	2	6	3	0	0	0	0	0		1	0	0	0	0	0	0	0	0	0	0	0	0
2	2015-01-22 12:03:58	2015-01-22 17:51:32	2015-01-22	359000000000000	Phonex	Malomo	Vg103	3	1	1	1	28	1	1	3	1		1	2	0	3	3	0	0	0	0	0		1	0	0	0	0	0	0	0	0	0	0	0	0
2	2015-01-22 12:13:56	2015-01-22 17:51:50	2015-01-22	359000000000000	Phonex	Malomo	Vg103	3	2	3	2	21	1	1	2	1		1	2	0	3	3	0	0	0	0	0		1	0	0	0	0	0	0	0	0	0	0	0	0
2	2015-01-22 12:14:25	2015-01-22 18:01:06	2015-01-22	359000000000000	Collins	Malomo	Vg103	16	1	1	1	24	1	1	2	1		2	2	0	4	3	0	0	0	0	0		1	0	0	0	0	0	0	0	0	0	0	0	0
2	2015-01-22 12:33:25	2015-01-22 18:01:43	2015-01-22	359000000000000	Collins	Malomo	Vg103	27	1	1	1	57	1	1	2	1		1	0	2	3	3	0	0	0	0	0		1	0	0	0	0	0	0	0	0	0	0	0	0
2	2015-01-22 12:44:49	2015-01-22 16:33:34	2015-01-22	360000000000000	Kalua	MALOMO	Vg237	23	2	3	2	31	1	1	2	2		3	1	1	5	3	0	0	0	0	0		1	0	0	0	0	0	0	0	0	0	0	0	0
2	2015-01-22 12:52:45	2015-01-22 16:33:57	2015-01-22	360000000000000	Kalua	MALOMO	Vg237	23	1	1	1	40	1	1	2	2		3	1	1	5	3	0	0	0	0	0		1	0	0	0	0	0	0	0	0	0	0	0	0
2	2015-01-22 13:04:03	2015-01-22 17:56:53	2015-01-22	358000000000000	Francis	Malomo	Vg103	21	3	5	1	20	1	4	2	1		4	3	2	9	3	0	0	0	0	0		1	0	0	0	0	0	0	0	0	0	0	0	0
2	2015-01-22 13:09:13	2015-01-22 17:03:01	2015-01-22	359000000000000	Valens	Malomo	Vg210	26	1	3	2	69	1	1	2	1		0	0	2	2	3	0	0	0	0	0		1	0	0	0	0	0	0	0	0	0	0	0	0
2	2015-01-22 13:11:05	2015-01-22 18:04:36	2015-01-22	360000000000000	Saukila	Malomo	Vg186	52	2	3	2	20	1	1	2	2		2	2	0	4	2	0	0	0	0	0		1	0	0	0	0	0	0	0	0	0	0	0	0
2	2015-01-22 13:14:58	2015-01-22 17:52:25	2015-01-22	359000000000000	Phonex	Malomo	Vg103	12	1	1	1	60	1	1	2	2		3	1	2	6	3	0	0	0	0	0		1	0	0	0	0	0	0	0	0	0	0	0	0
2	2015-01-22 13:15:35	2015-01-22 18:16:00	2015-01-22	358000000000000	Dalitso	Malomo	Vg181	57	2	3	2	56	1	1	2	1		1	0	2	3	3	0	0	0	0	0		1	0	0	0	0	0	0	0	0	0	0	0	0
2	2015-01-22 13:18:41	2015-01-22 18:06:12	2015-01-22	356000000000000	Maureen	Malomo	Vg103	25	2	1	2	31	1	2	2	1		3	2	1	6	3	0	0	0	0	0		1	0	0	0	0	0	0	0	0	0	0	0	0
2	2015-01-22 13:19:15	2015-01-22 17:52:32	2015-01-22	359000000000000	Phonex	Malomo	Vg103	12	2	3	2	55	1	1	2	2		3	1	2	6	3	0	0	0	0	0		1	0	0	0	0	0	0	0	0	0	0	0	0
2	2015-01-22 13:22:07	2015-01-22 17:55:08	2015-01-22	359000000000000	Alex	Malomo	Vg103	8	2	3	2	26	1	1	2	1		3	2	0	5	3	0	0	0	0	0		1	0	0	0	0	0	0	0	0	0	0	1	0		media\1421925997056.jpg
2	2015-01-22 13:26:04	2015-01-22 17:25:42	2015-01-22	360000000000000	Eddah	Malomo	Vg169	29	1	1	1	42	1	1	1	1		3	2	1	6	3	0	0	0	0	0		1	0	0	0	0	0	0	0	0	0	0	0	0
2	2015-01-22 13:29:52	2015-01-22 16:38:06	2015-01-22	360000000000000	Kalua	MALOMO	Vg237	24	2	3	2	31	1	1	2	1		3	1	1	5	3	0	0	0	0	0		1	0	0	0	0	0	0	0	0	0	0	0	0
2	2015-01-22 13:30:56	2015-01-22 17:03:47	2015-01-22	359000000000000	Valens	Malomo	Vg210	28	1	1	2	41	1	1	3	4		1	1	1	3	3	0	0	0	0	0		1	0	0	0	0	0	0	0	0	0	0	0	0
2	2015-01-22 13:32:30	2015-01-22 18:05:31	2015-01-22	360000000000000	Saukila	Malomo	Vg186	37	1	1	1	49	1	1	3	1		1	2	2	5	3	0	0	0	0	0		1	0	0	0	0	0	0	0	0	0	0	0	0
2	2015-01-22 13:32:52	2015-01-22 17:26:14	2015-01-22	360000000000000	Eddah	Malomo	Vg169	29	2	3	2	35	1	1	1	1		3	2	1	6	3	0	0	0	0	0		1	0	0	0	0	0	0	0	0	0	0	0	0
2	2015-01-22 13:33:46	2015-01-22 16:39:00	2015-01-22	360000000000000	Kalua	MALOMO	Vg237	24	1	1	1	49	1	1	2	1		3	1	1	5	3	0	0	0	0	0		1	0	0	0	0	0	0	0	0	0	0	0	0
2	2015-01-22 13:41:14	2015-01-22 18:17:48	2015-01-22	358000000000000	Dalitso	Malomo	Vg181	20	1	1	1	65	1	1	2	1		3	3	2	8	3	0	0	0	0	0		1	0	0	0	0	0	0	0	0	0	0	0	0
2	2015-01-22 13:41:38	2015-01-22 16:39:42	2015-01-22	360000000000000	Kalua	MALOMO	Vg237	31	1	1	1	33	1	1	3	2		3	2	0	5	3	0	0	0	0	0		1	0	0	0	0	0	0	0	0	0	0	0	0
2	2015-01-22 13:50:25	2015-01-22 17:04:41	2015-01-22	359000000000000	Valens	Malomo	Vg210	29	1	1	1	41	1	1	3	4		5	1	1	7	3	0	0	0	0	0		1	0	0	0	0	0	0	0	0	0	0	0	0
2	2015-01-22 13:50:58	2015-01-22 16:40:17	2015-01-22	360000000000000	Kalua	MALOMO	Vg237	31	2	3	2	26	1	1	3	2		3	2	0	5	3	0	0	0	0	0		1	0	0	0	0	0	0	0	0	0	0	0	0
2	2015-01-22 13:53:33	2015-01-22 18:06:53	2015-01-22	360000000000000	Saukila	Malomo	Vg186	33	2	3	2	23	1	1	2	2		2	2	0	4	2	0	0	0	0	0		1	0	0	0	0	0	0	0	0	0	0	0	0
2	2015-01-22 13:53:48	2015-01-22 18:25:17	2015-01-22	359000000000000	Gausi	Malomo	Vg196	21	1	5	2	34	1	2	2	1		5	1	2	8	3	0	0	0	0	0		1	0	0	0	0	0	0	0	0	0	0	0	0
2	2015-01-22 13:57:50	2015-01-22 18:07:23	2015-01-22	360000000000000	Saukila	Malomo	Vg186	33	1	1	1	25	1	1	2	3		2	2	0	4	2	0	0	0	0	0		1	0	0	0	0	0	0	0	0	0	0	0	0
2	2015-01-22 13:58:14	2015-01-22 17:04:55	2015-01-22	359000000000000	Valens	Malomo	Vg210	29	2	3	2	36	1	1	3	1		5	1	1	7	3	0	0	0	0	0		1	0	0	0	0	0	0	0	0	0	0	0	0
2	2015-01-22 14:01:45	2015-01-22 16:41:44	2015-01-22	360000000000000	Kalua	MALOMO	Vg237	27	1	1	1	33	1	1	2	2		3	2	0	5	3	0	0	0	0	0		1	0	0	0	0	0	0	0	0	0	0	0	0
2	2015-01-22 14:04:55	2015-01-22 18:26:12	2015-01-22	359000000000000	Gausi	Malomo	Vg196	21	3	3	2	59	1	1	1	1		5	1	2	8	3	0	0	0	0	0		1	0	0	0	0	0	0	0	0	0	0	0	0
2	2015-01-22 14:04:56	2015-01-22 17:10:54	2015-01-22	360000000000000	Patrick	Malomo	Vg150	1	2	3	2	40	1	1	1	1		5	3	2	10	3	0	1	1	1	0		1	0	0	0	0	0	0	0	0	0	0	0	0
2	2015-01-22 14:08:39	2015-01-22 17:55:12	2015-01-22	356000000000000	Halima	Malomo	Vg130	41	2	3	2	20	1	1	2	1		1	2	0	3	3	0	0	0	0	0		1	0	0	0	0	0	0	0	0	0	0	0	0
2	2015-01-22 14:09:16	2015-01-22 16:42:13	2015-01-22	360000000000000	Kalua	MALOMO	Vg237	27	2	3	2	31	1	1	2	2		3	2	0	5	3	0	0	0	0	0		1	0	0	0	0	0	0	0	0	0	0	0	0
2	2015-01-22 14:12:56	2015-01-22 17:56:10	2015-01-22	356000000000000	Halima	Malomo	Vg130	28	1	3	2	54	1	1	1	1		0	0	2	2	3	0	0	0	0	0		1	0	0	0	0	0	0	0	0	0	0	0	0
2	2015-01-22 14:14:15	2015-01-22 18:07:45	2015-01-22	360000000000000	Saukila	Malomo	Vg186	25	2	3	2	42	1	1	2	2		0	4	2	6	3	0	0	0	0	0		1	0	0	0	0	0	0	0	0	0	0	0	0
2	2015-01-22 14:21:35	2015-01-22 18:08:06	2015-01-22	360000000000000	Saukila	Malomo	Vg186	25	3	5	2	24	1	4	3	2		0	4	2	6	3	0	0	0	0	0		1	0	0	0	0	0	0	0	0	0	0	1	0		media\1421929488134.jpg
2	2015-01-22 14:22:35	2015-01-22 16:43:48	2015-01-22	360000000000000	Kalua	MALOMO	Vg237	6	2	3	2	28	1	1	3	3		0	3	1	4	3	0	0	0	0	0		1	0	0	0	0	0	0	0	0	0	0	0	0
2	2015-01-22 14:24:37	2015-01-22 18:26:38	2015-01-22	359000000000000	Gausi	Malomo	Vg196	12	1	3	2	66	1	1	1	1		1	0	2	3	3	0	0	0	0	0		1	0	0	0	0	0	0	0	0	0	0	0	0
2	2015-01-22 14:25:12	2015-01-22 18:08:19	2015-01-22	360000000000000	Saukila	Malomo	Vg186	25	4	5	1	26	1	4	3	5		0	4	2	6	3	0	0	0	0	0		1	0	0	0	0	0	0	0	0	0	0	0	0
2	2015-01-22 14:25:57	2015-01-22 18:19:28	2015-01-22	358000000000000	Dalitso	Malomo	Vg181	23	1	1	1	26	1	1	3	1		2	2	0	4	3	0	0	0	0	0		1	0	0	0	0	0	0	0	0	0	0	0	0
2	2015-01-22 14:27:40	2015-01-22 16:44:32	2015-01-22	360000000000000	Kalua	MALOMO	Vg237	6	3	6	2	61	1	3	2	3		0	3	1	4	3	0	0	0	0	0		1	0	0	0	0	0	0	0	0	0	0	0	0
2	2015-01-22 14:27:45	2015-01-22 18:08:33	2015-01-22	360000000000000	Saukila	Malomo	Vg186	25	5	5	2	22	1	1	3	2		0	4	2	6	3	0	0	0	0	0		1	0	0	0	0	0	0	0	0	0	0	0	0
2	2015-01-22 14:29:44	2015-01-22 17:27:18	2015-01-22	360000000000000	Eddah	Malomo	Vg169	38	5	5	1	21	1	1	1	1		3	5	2	10	3	0	0	0	0	0		1	0	0	0	0	0	0	0	0	0	0	0	0
2	2015-01-22 14:31:17	2015-01-22 18:08:47	2015-01-22	360000000000000	Saukila	Malomo	Vg186	25	6	5	2	15	1	4	2	5		0	4	2	6	3	0	0	0	0	0		1	0	0	0	0	0	0	0	0	0	0	0	0
2	2015-01-22 14:34:28	2015-01-22 18:19:47	2015-01-22	358000000000000	Dalitso	Malomo	Vg181	23	2	3	2	24	1	1	3	1		2	2	0	4	3	0	0	0	0	0		1	0	0	0	0	0	0	0	0	0	0	0	0
2	2015-01-22 14:37:53	2015-01-22 17:27:42	2015-01-22	360000000000000	Eddah	Malomo	Vg169	38	4	5	1	22	1	3	1	3		3	5	2	10	3	0	0	0	0	0		1	0	0	0	0	0	0	0	0	0	0	0	0
2	2015-01-22 14:42:33	2015-01-22 16:45:14	2015-01-22	360000000000000	Kalua	MALOMO	Vg237	11	2	3	2	36	1	1	2	1		4	3	0	7	3	0	0	0	0	0		1	0	0	0	0	0	0	0	0	0	0	0	0
2	2015-01-22 14:45:11	2015-01-22 17:28:35	2015-01-22	360000000000000	Eddah	Malomo	Vg169	38	9	6	2	19	1	1	1	1		3	5	2	10	3	0	0	0	0	0		1	0	0	0	0	0	0	0	0	0	0	0	0
2	2015-01-22 14:48:15	2015-01-22 18:09:09	2015-01-22	360000000000000	Saukila	Malomo	Vg186	31	1	1	2	54	1	3	3	2		0	0	1	1	3	0	1	1	0	0		1	0	0	0	0	1	0	0	0	0	0	1	0		media\1421931881698.jpg
2	2015-01-22 14:50:45	2015-01-22 17:06:14	2015-01-22	359000000000000	Valens	Malomo	Vg210	10	2	3	2	20	1	1	2	1		1	2	0	3	3	0	0	0	0	0		1	0	0	0	0	0	0	0	0	0	0	0	0
2	2015-01-22 14:52:23	2015-01-22 16:46:02	2015-01-22	360000000000000	Kalua	MALOMO	Vg237	11	3	5	1	16	1	4	2	5		4	3	0	7	3	0	0	0	0	0		1	0	0	0	0	0	0	0	0	0	0	0	0
2	2015-01-22 14:54:39	2015-01-22 18:20:51	2015-01-22	358000000000000	Dalitso	Malomo	Vg181	22	1	1	1	53	1	1	3	4		1	5	2	8	3	0	0	0	0	0		1	0	0	0	0	0	0	0	0	0	0	0	0
2	2015-01-22 14:54:44	2015-01-22 17:12:11	2015-01-22	360000000000000	Patrick	Malomo	Vg150	2	2	4	1	97	1	1	2	1		0	0	4	4	3	0	0	1	0	0		1	0	0	0	0	0	0	0	0	0	0	0	0
2	2015-01-22 14:57:19	2015-01-22 17:07:15	2015-01-22	359000000000000	Valens	Malomo	Vg210	10	1	1	1	21	1	1	2	1		1	2	0	3	3	0	0	0	0	0		1	0	0	0	0	0	0	0	0	0	0	0	0
2	2015-01-22 15:00:58	2015-01-22 18:21:07	2015-01-22	358000000000000	Dalitso	Malomo	Vg181	22	2	3	2	50	1	1	2	1		1	5	2	8	3	0	0	0	0	0		1	0	0	0	0	0	0	0	0	0	0	0	0
2	2015-01-22 15:00:59	2015-01-22 18:27:36	2015-01-22	359000000000000	Gausi	Malomo	Vg196	14	1	3	2	61	1	1	2	1		0	1	3	4	3	0	0	0	0	0		1	0	0	0	0	0	0	0	0	0	0	1	0		media\1421932231887.jpg
2	2015-01-22 15:07:15	2015-01-22 16:46:19	2015-01-22	360000000000000	Kalua	MALOMO	Vg237	43	2	3	2	34	1	1	2	2		4	3	1	8	3	0	0	0	0	0		1	0	0	0	0	0	0	0	0	0	0	0	0
2	2015-01-22 15:08:36	2015-01-22 17:13:31	2015-01-22	360000000000000	Patrick	Malomo	Vg150	2	3	4	2	93	1	1	2	1		0	0	4	4	3	0	0	0	0	0		1	0	0	0	0	0	0	0	0	0	0	0	0
2	2015-01-22 15:10:22	2015-01-22 17:07:50	2015-01-22	359000000000000	Valens	Malomo	Vg210	8	1	1	2	67	1	3	2	1		1	0	1	2	3	0	0	0	1	0		1	0	0	0	0	0	0	0	0	0	0	0	0
2	2015-01-22 15:12:19	2015-01-22 16:46:39	2015-01-22	360000000000000	Kalua	MALOMO	Vg237	43	1	1	1	40	1	1	2	2		4	3	1	8	3	0	0	0	0	0		1	0	0	0	0	0	0	0	0	0	0	0	0
2	2015-01-22 15:13:39	2015-01-22 18:27:49	2015-01-22	359000000000000	Gausi	Malomo	Vg196	14	2	5	2	20	1	4	2	1		0	1	3	4	3	0	0	0	0	0		1	0	0	0	0	0	0	0	0	0	0	0	0
2	2015-01-22 15:14:30	2015-01-22 16:49:22	2015-01-22	360000000000000	Kalua	MALOMO	Vg237	43	3	6	1	19	1	4	1	2		4	3	1	8	3	0	0	0	0	0		1	0	0	0	0	0	0	0	0	0	0	0	0
2	2015-01-22 15:20:19	2015-01-22 17:57:53	2015-01-22	356000000000000	Halima	Malomo	Vg130	30	3	5	1	22	1	4	2	1		3	1	2	6	3	0	1	1	0	0		1	0	0	0	0	0	0	0	0	0	0	0	0
2	2015-01-22 15:23:11	2015-01-22 17:33:10	2015-01-22	360000000000000	Eddah	Malomo	Vg169	22	2	3	2	38	1	1	1	1		2	4	1	7	3	0	0	0	0	0		1	0	0	0	0	0	0	0	0	0	0	0	0
2	2015-01-22 15:25:37	2015-01-22 18:28:00	2015-01-22	359000000000000	Gausi	Malomo	Vg196	14	3	4	2	88	1	3	1	other	Too old to work	0	1	3	4	3	0	0	0	0	0		1	0	0	0	0	0	0	0	0	0	0	0	0
2	2015-01-22 15:29:37	2015-01-22 17:58:12	2015-01-22	356000000000000	Halima	Malomo	Vg130	30	1	3	2	49	1	1	1	1		3	1	2	6	3	0	0	0	0	0		1	0	0	0	0	0	0	0	0	0	0	0	0
2	2015-01-22 15:33:49	2015-01-22 18:22:22	2015-01-22	358000000000000	Dalitso	Malomo	Vg181	38	1	1	1	43	1	1	3	1		4	1	1	6	3	0	0	0	0	0		1	0	0	0	0	0	0	0	0	0	0	0	0
2	2015-01-22 15:39:26	2015-01-22 18:28:35	2015-01-22	359000000000000	Gausi	Malomo	Vg196	20	1	1	2	34	1	2	2	1		1	2	0	3	3	0	0	0	0	0		1	0	0	0	0	0	0	0	0	0	0	0	0
2	2015-01-22 15:39:39	2015-01-22 18:22:50	2015-01-22	358000000000000	Dalitso	Malomo	Vg181	38	2	3	2	36	1	1	2	1		4	1	1	6	3	0	0	0	0	0		1	0	0	0	0	0	0	0	0	0	0	0	0
2	2015-01-22 15:40:07	2015-01-22 17:14:02	2015-01-22	360000000000000	Patrick	Malomo	Vg150	2	1	1	2	68	1	2	2	1		0	0	4	4	3	0	0	0	0	0		1	0	0	0	0	0	0	0	0	0	0	0	0
2	2015-01-22 15:43:21	2015-01-22 18:28:54	2015-01-22	359000000000000	Gausi	Malomo	Vg196	20	2	5	2	15	1	4	2	5		1	2	0	3	3	0	0	0	0	0		1	0	0	0	0	0	0	0	0	0	0	0	0
2	2015-01-22 15:43:56	2015-01-22 17:08:16	2015-01-22	359000000000000	Valens	Malomo	Vg210	1	1	1	1	31	1	1	2	1		1	2	0	3	3	0	0	0	0	0		1	0	0	0	0	0	0	0	0	0	0	0	0
2	2015-01-22 15:45:53	2015-01-22 17:35:30	2015-01-22	360000000000000	Eddah	Malomo	Vg169	22	3	5	2	21	1	4	3	5		2	4	1	7	3	0	0	0	0	1	Heart palpitation	1	0	0	0	0	0	0	0	0	0	0	0	0
2	2015-01-22 15:46:59	2015-01-22 17:14:22	2015-01-22	360000000000000	Patrick	Malomo	Vg150	2	4	5	2	52	1	2	2	1		0	0	4	4	3	0	0	0	0	0		1	0	0	0	0	0	0	0	0	0	0	0	0
2	2015-01-22 15:51:09	2015-01-22 17:35:52	2015-01-22	360000000000000	Eddah	Malomo	Vg169	22	4	5	1	18	1	4	1	1		2	4	1	7	3	0	0	0	0	0		1	0	0	0	0	0	0	0	0	0	0	0	0
2	2015-01-22 15:54:28	2015-01-22 17:36:14	2015-01-22	360000000000000	Eddah	Malomo	Vg169	22	5	5	1	16	1	4	2	5		2	4	1	7	3	0	0	0	0	0		1	0	0	0	0	0	0	0	0	0	0	0	0
2	2015-01-22 16:06:03	2015-01-22 17:15:23	2015-01-22	360000000000000	Patrick	Malomo	Vg150	11	4	5	2	25	1	4	3	1		1	3	2	6	3	0	0	0	0	0		1	0	0	0	0	0	0	0	0	0	0	0	0
2	2015-01-22 16:08:41	2015-01-22 18:23:05	2015-01-22	358000000000000	Dalitso	Malomo	Vg181	2	1	1	1	45	1	1	2	1		4	1	2	7	3	0	0	0	0	0		1	0	0	0	0	0	0	0	0	0	0	0	0
2	2015-01-22 16:14:22	2015-01-22 17:16:02	2015-01-22	360000000000000	Patrick	Malomo	Vg150	11	2	3	2	52	1	1	2	1		1	3	2	6	3	0	0	0	0	0		1	0	0	0	0	0	0	0	0	0	0	0	0
2	2015-01-22 16:18:05	2015-01-22 17:17:17	2015-01-22	360000000000000	Patrick	Malomo	Vg150	11	1	1	1	62	1	1	3	1		1	3	2	6	3	0	0	0	0	0		1	0	0	0	0	0	0	0	0	0	0	0	0
2	2015-01-22 16:20:09	2015-01-22 18:29:11	2015-01-22	359000000000000	Gausi	Malomo	Vg196	18	1	1	1	27	1	1	3	1		2	2	0	4	3	0	0	0	0	0		1	0	0	0	0	0	0	0	0	0	0	0	0
2	2015-01-22 16:20:51	2015-01-22 18:23:24	2015-01-22	358000000000000	Dalitso	Malomo	Vg181	2	2	3	2	40	1	1	2	1		4	1	2	7	3	0	0	0	0	0		1	0	0	0	0	0	0	0	0	0	0	0	0
2	2015-01-22 16:24:16	2015-01-22 18:29:23	2015-01-22	359000000000000	Gausi	Malomo	Vg196	18	2	3	2	21	1	1	2	1		2	2	0	4	3	0	0	0	0	0		1	0	0	0	0	0	0	0	0	0	0	0	0
2	2015-01-22 16:25:47	2015-01-22 17:36:47	2015-01-22	360000000000000	Eddah	Malomo	Vg169	27	1	1	1	56	1	1	2	1		2	3	2	7	3	0	0	0	0	0		1	0	0	0	0	0	0	0	0	0	0	0	0
2	2015-01-22 16:25:51	2015-01-22 18:23:44	2015-01-22	358000000000000	Dalitso	Malomo	Vg181	2	3	5	2	17	1	4	2	5		4	1	2	7	3	0	0	0	0	0		1	0	0	0	0	0	0	0	0	0	0	0	0
2	2015-01-22 16:32:19	2015-01-22 17:37:14	2015-01-22	360000000000000	Eddah	Malomo	Vg169	27	2	3	2	54	1	1	1	1		2	3	2	7	3	0	0	0	0	0		1	0	0	0	0	0	0	0	0	0	0	0	0
2	2015-01-22 16:34:39	2015-01-22 17:38:55	2015-01-22	360000000000000	Eddah	Malomo	Vg169	27	3	5	1	22	1	4	2	1		2	3	2	7	3	0	0	0	0	0		1	0	0	0	0	0	0	0	0	0	0	0	0
2	2015-01-22 16:36:34	2015-01-22 17:52:59	2015-01-22	359000000000000	Phonex	Mkhuzi	Vg94	33	1	1	1	27	1	1	2	1		1	2	0	3	3	0	0	0	0	0		1	0	0	0	0	0	0	0	0	0	0	0	0
2	2015-01-22 16:42:27	2015-01-22 17:53:12	2015-01-22	359000000000000	Phonex	Mkhuzi	Vg94	33	2	3	2	25	1	1	2	1		1	2	0	3	3	0	0	0	0	0		1	0	0	0	0	0	0	0	0	0	0	0	0
2	2015-01-23 10:29:35	2015-01-23 19:31:47	2015-01-23	359000000000000	Gausi	Malomo	Vg196	1	1	1	1	32	1	1	2	1		1	4	0	5	3	0	0	0	0	0		1	0	0	0	0	0	0	0	0	0	0	0	0
2	2015-01-23 10:34:12	2015-01-23 18:39:45	2015-01-23	360000000000000	Patrick	Malomo	Vg150	13	1	1	1	53	1	1	2	1		3	1	1	5	3	0	0	0	0	0		1	0	0	0	0	0	0	0	0	0	0	0	0
2	2015-01-23 10:35:38	2015-01-23 19:33:22	2015-01-23	359000000000000	Gausi	Malomo	Vg196	1	2	3	2	23	1	1	1	1		1	4	0	5	3	0	0	0	0	0		1	0	0	0	0	0	0	0	0	0	0	0	0
2	2015-01-23 10:36:30	2015-01-23 18:07:20	2015-01-23	359000000000000	Alex	Malomo	Vg218	30	1	1	1	45	1	1	2	1		3	3	1	7	3	0	0	0	0	0		1	0	0	0	0	0	0	0	0	0	0	0	0
2	2015-01-23 10:38:50	2015-01-23 19:33:51	2015-01-23	359000000000000	Gausi	Malomo	Vg196	1	3	3	2	23	1	1	2	1		1	4	0	5	3	0	0	0	0	0		1	0	0	0	0	0	0	0	0	0	0	0	0
2	2015-01-23 10:39:58	2015-01-23 18:39:56	2015-01-23	360000000000000	Patrick	Malomo	Vg150	13	2	3	2	36	1	1	2	1		3	1	1	5	3	0	0	0	0	0		1	0	0	0	0	0	0	0	0	0	0	0	0
2	2015-01-23 10:41:46	2015-01-23 19:34:09	2015-01-23	359000000000000	Gausi	Malomo	Vg196	1	5	6	1	24	1	4	2	1		1	4	0	5	3	0	0	0	0	0		1	0	0	0	0	0	0	0	0	0	0	0	0
2	2015-01-23 10:47:08	2015-01-23 19:18:27	2015-01-23	360000000000000	Eddah	Malomo	Vg169	9	1	1	1	36	1	1	2	1		4	3	0	7	3	0	0	0	0	0		1	0	0	0	0	0	0	0	0	0	0	0	0
2	2015-01-23 10:48:48	2015-01-23 18:07:47	2015-01-23	359000000000000	Alex	Malomo	Vg218	30	2	3	2	39	1	1	1	1		3	3	1	7	3	0	0	0	0	0		1	0	0	0	0	0	0	0	0	0	0	0	0
2	2015-01-23 10:50:38	2015-01-23 19:18:44	2015-01-23	360000000000000	Eddah	Malomo	Vg169	9	2	3	2	31	1	1	1	1		4	3	0	7	3	0	0	0	0	0		1	0	0	0	0	0	0	0	0	0	0	0	0
2	2015-01-23 10:54:17	2015-01-23 19:19:07	2015-01-23	360000000000000	Eddah	Malomo	Vg169	9	3	5	2	15	1	4	2	5		4	3	0	7	3	0	0	0	0	0		1	0	0	0	0	0	0	0	0	0	0	0	0
2	2015-01-23 11:09:57	2015-01-23 18:22:17	2015-01-23	360000000000000	Kalua	MALOMO	Vg163	21	1	1	1	65	1	1	2	1		0	3	2	5	3	0	0	0	0	0		1	0	0	0	0	0	0	0	0	0	0	0	0
2	2015-01-23 11:11:54	2015-01-23 19:20:03	2015-01-23	360000000000000	Eddah	Malomo	Vg169	13	2	3	2	35	1	1	2	1		3	3	0	6	3	0	0	0	0	0		1	0	0	0	0	0	0	0	0	0	0	0	0
2	2015-01-23 11:15:01	2015-01-23 18:32:21	2015-01-23	359000000000000	Collins	Malomo	Vg175	36	4	5	2	16	1	4	2	5		1	2	2	5	3	0	0	0	0	0		1	0	0	0	0	0	0	0	0	0	0	0	0
2	2015-01-23 11:15:41	2015-01-23 19:35:18	2015-01-23	358000000000000	Francis	Malomo	Vg231	5	1	1	1	28	1	1	3	1		1	3	1	5	3	0	0	1	0	0		1	0	0	0	0	0	0	0	0	0	0	1	0		media\1422004869973.jpg
2	2015-01-23 11:17:25	2015-01-23 18:49:56	2015-01-23	358000000000000	Dalitso	Malomo	Vg181	42	1	1	1	29	1	1	2	1		2	2	0	4	3	0	0	0	0	0		1	0	0	0	0	0	0	0	0	0	0	0	0
2	2015-01-23 11:18:14	2015-01-23 19:22:39	2015-01-23	360000000000000	Eddah	Malomo	Vg169	13	1	1	1	39	1	1	1	1		3	3	0	6	3	0	0	0	0	0		1	0	0	0	0	0	0	0	0	0	0	0	0
2	2015-01-23 11:20:04	2015-01-23 18:33:08	2015-01-23	359000000000000	Collins	Malomo	Vg175	36	2	1	1	57	1	1	2	1		1	2	2	5	3	0	0	0	0	0		1	0	0	0	0	0	0	0	0	0	0	0	0
2	2015-01-23 11:21:33	2015-01-23 19:23:03	2015-01-23	360000000000000	Eddah	Malomo	Vg169	13	3	6	1	20	1	4	2	1		3	3	0	6	3	0	0	0	0	0		1	0	0	0	0	0	0	0	0	0	0	0	0
2	2015-01-23 11:21:47	2015-01-23 18:33:27	2015-01-23	359000000000000	Collins	Malomo	Vg175	36	1	3	2	53	1	1	2	1		1	2	2	5	3	0	0	0	0	0		1	0	0	0	0	0	0	0	0	0	0	0	0
2	2015-01-23 11:22:12	2015-01-23 19:34:33	2015-01-23	359000000000000	Gausi	Malomo	Vg196	31	1	1	1	30	1	1	3	1		2	2	0	4	3	0	0	0	0	0		1	0	0	0	0	0	0	0	0	0	0	0	0
2	2015-01-23 11:23:16	2015-01-23 19:35:37	2015-01-23	358000000000000	Francis	Malomo	Vg231	5	2	3	2	25	1	1	2	1		1	3	1	5	3	0	0	0	0	0		1	0	0	0	0	0	0	0	0	0	0	0	0
2	2015-01-23 11:23:38	2015-01-23 18:23:09	2015-01-23	360000000000000	Kalua	MALOMO	Vg163	21	3	5	1	22	1	1	2	1		0	3	2	5	3	0	0	0	0	0		1	0	0	0	0	0	0	0	0	0	0	0	0
2	2015-01-23 11:25:41	2015-01-23 18:50:12	2015-01-23	358000000000000	Dalitso	Malomo	Vg181	42	2	3	2	28	1	1	3	1		2	2	0	4	3	0	0	0	0	0		1	0	0	0	0	0	0	0	0	0	0	0	0
2	2015-01-23 11:27:34	2015-01-23 19:34:56	2015-01-23	359000000000000	Gausi	Malomo	Vg196	31	2	3	2	26	1	1	2	1		2	2	0	4	3	0	0	0	0	0		1	0	0	0	0	0	0	0	0	0	0	0	0
2	2015-01-23 11:27:39	2015-01-23 18:40:38	2015-01-23	360000000000000	Patrick	Malomo	Vg150	21	1	1	1	48	1	1	2	4		0	2	2	4	3	0	0	0	0	0		1	0	0	0	0	0	0	0	0	0	0	0	0
2	2015-01-23 11:28:00	2015-01-23 18:08:59	2015-01-23	359000000000000	Alex	Malomo	Vg218	33	5	6	1	15	1	4	2	5		2	2	1	5	3	0	0	0	0	0		1	0	0	0	0	0	0	0	0	0	0	1	0		media\1422005430401.jpg
2	2015-01-23 11:30:52	2015-01-23 18:09:14	2015-01-23	359000000000000	Alex	Malomo	Vg218	33	2	5	1	20	1	1	2	1		2	2	1	5	3	0	0	0	0	0		1	0	0	0	0	0	0	0	0	0	0	1	0		media\1422005706128.jpg
2	2015-01-23 11:33:16	2015-01-23 18:23:41	2015-01-23	360000000000000	Kalua	MALOMO	Vg163	21	5	5	1	16	1	4	2	1		0	3	2	5	3	0	0	0	0	0		1	0	0	0	0	0	0	0	0	0	0	0	0
2	2015-01-23 11:38:40	2015-01-23 19:36:00	2015-01-23	358000000000000	Francis	Malomo	Vg231	1	1	1	1	54	1	1	2	1		2	0	2	4	3	0	0	0	0	0		1	0	0	0	0	0	0	0	0	0	0	0	0
2	2015-01-23 11:41:54	2015-01-23 19:23:36	2015-01-23	360000000000000	Eddah	Malomo	Vg169	2	1	1	1	44	1	1	2	1		1	4	1	6	3	0	0	0	0	0		1	0	0	0	0	0	0	0	0	0	0	0	0
2	2015-01-23 11:42:46	2015-01-23 18:52:46	2015-01-23	356000000000000	Maureen	Malomo	Vg191	17	4	5	1	24	1	4	4	5		3	4	1	8	3	0	0	0	0	0		1	0	0	0	0	0	0	0	0	0	0	0	0
2	2015-01-23 11:46:16	2015-01-23 19:36:18	2015-01-23	358000000000000	Francis	Malomo	Vg231	1	2	3	2	50	1	1	1	1		2	0	2	4	3	0	0	0	0	0		1	0	0	0	0	0	0	0	0	0	0	0	0
2	2015-01-23 11:46:28	2015-01-23 18:09:51	2015-01-23	359000000000000	Alex	Malomo	Vg218	32	1	3	2	41	1	1	1	1		4	2	2	8	3	0	0	0	0	0		1	0	0	0	0	0	0	0	0	0	0	0	0
2	2015-01-23 11:46:38	2015-01-23 18:35:09	2015-01-23	359000000000000	Collins	Malomo	Vg175	37	1	1	1	32	1	1	3	1		3	2	0	5	3	0	0	0	0	0		1	0	0	0	0	0	0	0	0	0	0	0	0
2	2015-01-23 11:47:08	2015-01-23 19:23:49	2015-01-23	360000000000000	Eddah	Malomo	Vg169	2	2	3	2	39	1	1	1	1		1	4	1	6	3	0	0	0	0	0		1	0	0	0	0	0	0	0	0	0	0	0	0
2	2015-01-23 11:48:10	2015-01-23 18:21:06	2015-01-23	356000000000000	Halima	Malomo	Vg76	15	2	3	2	30	1	1	2	1		4	2	0	6	3	0	0	0	0	0		1	0	0	0	0	0	0	0	0	0	0	0	0
2	2015-01-23 11:49:12	2015-01-23 19:24:03	2015-01-23	360000000000000	Eddah	Malomo	Vg169	2	5	5	1	17	1	4	2	5		1	4	1	6	3	0	0	0	0	0		1	0	0	0	0	0	0	0	0	0	0	0	0
2	2015-01-23 11:49:41	2015-01-23 18:35:44	2015-01-23	359000000000000	Collins	Malomo	Vg175	37	2	3	2	28	1	1	3	1		3	2	0	5	3	0	0	0	0	0		1	0	0	0	0	0	0	0	0	0	0	0	0
2	2015-01-23 11:52:06	2015-01-23 19:00:26	2015-01-23	359000000000000	Valens	Malomo	Vg223	44	1	1	1	33	1	1	2	1		5	2	1	8	3	0	0	0	0	0		1	0	0	0	0	0	0	0	0	0	0	0	0
2	2015-01-23 12:00:55	2015-01-23 19:36:36	2015-01-23	358000000000000	Francis	Malomo	Vg231	7	2	3	2	26	1	1	3	1		1	2	0	3	3	0	0	0	0	0		1	0	0	0	0	0	0	0	0	0	0	0	0
2	2015-01-23 12:02:09	2015-01-23 18:21:21	2015-01-23	356000000000000	Halima	Malomo	Vg76	15	1	1	1	32	1	1	3	1		4	2	0	6	3	0	0	0	0	0		1	0	0	0	0	0	0	0	0	0	0	0	0
2	2015-01-23 12:02:38	2015-01-23 18:25:49	2015-01-23	360000000000000	Kalua	MALOMO	Vg163	17	3	6	1	18	1	4	2	1		3	4	1	8	3	0	0	0	0	0		1	0	0	0	0	0	0	0	0	0	0	0	0
2	2015-01-23 12:03:44	2015-01-23 19:36:51	2015-01-23	358000000000000	Francis	Malomo	Vg231	7	1	1	1	28	1	1	3	1		1	2	0	3	3	0	0	0	0	0		1	0	0	0	0	0	0	0	0	0	0	0	0
2	2015-01-23 12:06:24	2015-01-23 18:26:11	2015-01-23	360000000000000	Kalua	MALOMO	Vg163	17	4	6	1	18	1	4	2	1		3	4	1	8	3	0	0	0	0	0		1	0	0	0	0	0	0	0	0	0	0	0	0
2	2015-01-23 12:08:05	2015-01-23 19:00:51	2015-01-23	359000000000000	Valens	Malomo	Vg223	44	2	3	2	24	1	1	2	1		5	2	1	8	3	0	0	0	0	0		1	0	0	0	0	0	0	0	0	0	0	0	0
2	2015-01-23 12:08:43	2015-01-23 18:27:09	2015-01-23	360000000000000	Kalua	MALOMO	Vg163	17	5	5	1	15	1	4	2	1		3	4	1	8	3	0	0	0	0	0		1	0	0	0	0	0	0	0	0	0	0	0	0
2	2015-01-23 12:11:29	2015-01-23 19:45:14	2015-01-23	360000000000000	Saukila	Malomo	Vg186	18	2	3	2	23	1	1	2	3		2	2	0	4	3	0	0	0	0	0		1	0	0	0	0	0	0	0	0	0	0	0	0
2	2015-01-23 12:14:51	2015-01-23 18:40:41	2015-01-23	359000000000000	Collins	Malomo	Vg175	15	1	5	2	17	1	4	2	5		0	1	1	2	3	0	0	0	0	0		1	0	0	0	0	0	0	0	0	0	0	0	0
2	2015-01-23 12:15:45	2015-01-23 19:45:32	2015-01-23	360000000000000	Saukila	Malomo	Vg186	18	1	1	1	25	1	1	2	3		2	2	0	4	3	0	0	0	0	0		1	0	0	0	0	0	0	0	0	0	0	0	0
2	2015-01-23 12:18:44	2015-01-23 18:55:06	2015-01-23	356000000000000	Maureen	Malomo	Vg191	13	2	3	2	24	1	1	3	1		2	2	0	4	3	0	0	0	0	0		1	0	0	0	0	0	0	0	0	0	0	0	0
2	2015-01-23 12:20:06	2015-01-23 18:11:22	2015-01-23	359000000000000	Alex	Malomo	Vg218	47	1	1	1	48	1	1	2	1		4	1	2	7	3	0	0	0	0	0		1	0	0	0	0	0	0	0	0	0	0	0	0
2	2015-01-23 12:24:22	2015-01-23 18:11:41	2015-01-23	359000000000000	Alex	Malomo	Vg218	47	3	5	2	17	1	1	2	5		4	1	2	7	3	0	0	0	0	0		1	0	0	0	0	0	0	0	0	0	0	1	0		media\1422008802753.jpg
2	2015-01-23 12:27:28	2015-01-23 18:41:29	2015-01-23	359000000000000	Collins	Malomo	Vg175	14	3	5	2	15	1	4	2	5		3	3	0	6	3	0	0	0	0	0		1	0	0	0	0	0	0	0	0	0	0	0	0
2	2015-01-23 12:27:53	2015-01-23 19:01:22	2015-01-23	359000000000000	Valens	Malomo	Vg223	45	1	1	1	29	1	1	2	1		4	2	0	6	3	0	0	0	0	0		1	0	0	0	0	0	0	0	0	0	0	0	0
2	2015-01-23 12:30:12	2015-01-23 18:41:50	2015-01-23	359000000000000	Collins	Malomo	Vg175	14	1	1	1	30	1	1	3	1		3	3	0	6	3	0	0	0	0	0		1	0	0	0	0	0	0	0	0	0	0	0	0
2	2015-01-23 12:32:58	2015-01-23 19:02:32	2015-01-23	359000000000000	Valens	Malomo	Vg223	45	2	3	2	28	1	1	3	1		4	2	0	6	3	0	0	0	0	0		1	0	0	0	0	0	0	0	0	0	0	0	0
2	2015-01-23 12:33:10	2015-01-23 18:42:19	2015-01-23	359000000000000	Collins	Malomo	Vg175	14	2	3	2	26	1	1	2	1		3	3	0	6	3	0	0	0	0	0		1	0	0	0	0	0	0	0	0	0	0	0	0
2	2015-01-23 12:34:02	2015-01-23 18:30:12	2015-01-23	360000000000000	Kalua	MALOMO	Vg163	5	2	3	2	30	1	1	2	1		5	2	0	7	3	0	0	0	0	0		1	0	0	0	0	0	0	0	0	0	0	0	0
2	2015-01-23 12:36:53	2015-01-23 18:30:38	2015-01-23	360000000000000	Kalua	MALOMO	Vg163	3	1	1	1	57	1	1	3	1		1	3	2	6	3	0	0	0	0	0		1	0	0	0	0	0	0	0	0	0	0	0	0
2	2015-01-23 12:37:16	2015-01-23 19:46:09	2015-01-23	360000000000000	Saukila	Malomo	Vg186	33	1	1	2	50	1	3	2	1		1	1	1	3	3	0	0	0	0	0		1	0	0	0	0	0	0	0	0	0	0	0	0
2	2015-01-23 12:47:17	2015-01-23 18:14:58	2015-01-23	359000000000000	Alex	Malomo	Vg218	45	1	1	1	48	1	1	2	1		2	2	2	6	3	0	0	0	0	0		1	0	0	0	0	0	0	0	0	0	0	0	0
2	2015-01-23 12:47:50	2015-01-23 18:55:35	2015-01-23	356000000000000	Maureen	Malomo	Vg191	20	1	1	1	47	1	1	3	4		3	1	1	5	3	0	0	0	0	0		1	0	0	0	0	0	0	0	0	0	0	0	0
2	2015-01-23 12:48:56	2015-01-23 19:24:40	2015-01-23	360000000000000	Eddah	Malomo	Vg169	38	3	5	2	24	1	4	3	1		3	5	2	10	3	0	0	0	0	0		1	0	0	0	0	0	0	0	0	0	0	0	0
2	2015-01-23 12:49:06	2015-01-23 18:22:00	2015-01-23	356000000000000	Halima	Malomo	Vg76	32	2	1	1	55	1	1	2	1		2	2	2	6	3	0	0	0	0	0		1	0	0	0	0	0	0	0	0	0	0	0	0
2	2015-01-23 12:49:12	2015-01-23 18:43:33	2015-01-23	359000000000000	Collins	Malomo	Vg175	7	2	3	2	51	1	1	2	1		4	2	2	8	3	0	1	1	0	0		1	0	0	0	0	0	0	0	0	0	0	0	0
2	2015-01-23 12:50:26	2015-01-23 19:03:04	2015-01-23	359000000000000	Valens	Malomo	Vg223	53	5	5	1	17	1	4	2	5		0	4	1	5	3	0	0	0	0	0		1	0	0	0	0	0	0	0	0	0	0	0	0
2	2015-01-23 12:54:35	2015-01-23 18:44:01	2015-01-23	359000000000000	Collins	Malomo	Vg175	7	1	1	1	54	1	1	2	1		4	2	2	8	3	0	0	0	0	0		1	0	0	0	0	0	0	0	0	0	0	0	0
2	2015-01-23 12:54:44	2015-01-23 18:31:16	2015-01-23	360000000000000	Kalua	MALOMO	Vg163	3	2	3	2	51	1	1	2	1		1	3	2	6	3	0	0	0	0	0		1	0	0	0	0	0	0	0	0	0	0	0	0
2	2015-01-23 12:54:49	2015-01-23 19:35:13	2015-01-23	359000000000000	Gausi	Malomo	Vg196	42	1	1	1	45	1	1	2	1		4	4	1	9	3	0	0	0	0	0		1	0	0	0	0	0	0	0	0	0	0	0	0
2	2015-01-23 12:55:15	2015-01-23 18:15:43	2015-01-23	359000000000000	Alex	Malomo	Vg218	45	2	3	2	44	1	1	1	1		2	2	2	6	3	0	0	0	0	0		1	0	0	0	0	0	0	0	0	0	0	0	0
2	2015-01-23 12:57:11	2015-01-23 18:55:55	2015-01-23	356000000000000	Maureen	Malomo	Vg191	20	2	3	2	33	1	1	3	2		3	1	1	5	3	0	0	0	0	0		1	0	0	0	0	0	0	0	0	0	0	0	0
2	2015-01-23 12:57:10	2015-01-23 19:39:41	2015-01-23	358000000000000	Francis	Malomo	Vg231	9	2	2	1	65	1	1	2	other	Doesnt work	1	0	2	3	3	0	0	0	0	0		1	0	0	0	0	1	0	0	0	0	0	1	0		media\1422011292931.jpg
2	2015-01-23 12:58:35	2015-01-23 19:35:28	2015-01-23	359000000000000	Gausi	Malomo	Vg196	42	2	3	2	37	1	1	1	1		4	4	1	9	3	0	0	0	0	0		1	0	0	0	0	0	0	0	0	0	0	0	0
2	2015-01-23 12:59:34	2015-01-23 19:03:15	2015-01-23	359000000000000	Valens	Malomo	Vg223	53	1	1	2	73	1	3	2	1		0	4	1	5	3	0	0	0	0	0		1	0	0	0	0	0	0	0	0	0	0	0	0
2	2015-01-23 13:01:25	2015-01-23 19:35:42	2015-01-23	359000000000000	Gausi	Malomo	Vg196	42	3	5	2	17	1	4	2	5		4	4	1	9	3	0	0	0	0	0		1	0	0	0	0	0	0	0	0	0	0	0	0
2	2015-01-23 13:04:01	2015-01-23 19:36:14	2015-01-23	359000000000000	Gausi	Malomo	Vg196	42	4	5	2	15	1	4	2	5		4	4	1	9	3	0	0	0	0	0		1	0	0	0	0	0	0	0	0	0	0	0	0
2	2015-01-23 13:04:01	2015-01-23 18:32:05	2015-01-23	360000000000000	Kalua	MALOMO	Vg163	3	5	5	2	20	1	4	2	1		1	3	2	6	3	0	0	0	0	0		1	0	0	0	0	0	0	0	0	0	0	0	0
2	2015-01-23 13:08:21	2015-01-23 18:16:05	2015-01-23	359000000000000	Alex	Malomo	Vg218	50	1	1	1	29	1	1	2	1		3	2	0	5	3	0	0	0	0	0		1	0	0	0	0	0	0	0	0	0	0	0	0
2	2015-01-23 13:09:16	2015-01-23 18:22:23	2015-01-23	356000000000000	Halima	Malomo	Vg76	32	3	5	1	23	1	4	3	1		2	2	2	6	3	0	0	0	0	0		1	0	0	0	0	0	0	0	0	0	0	0	0
2	2015-01-23 13:09:38	2015-01-23 18:51:47	2015-01-23	358000000000000	Dalitso	Malomo	Vg42	2	1	1	2	76	1	3	2	1		0	4	1	5	3	0	0	0	0	0		1	0	0	0	0	0	0	0	0	0	0	0	0
2	2015-01-23 13:12:14	2015-01-23 18:17:08	2015-01-23	359000000000000	Alex	Malomo	Vg218	50	2	3	2	20	1	1	1	1		3	2	0	5	3	0	0	0	0	0		1	0	0	0	0	0	0	0	0	0	0	0	0
2	2015-01-23 13:12:19	2015-01-23 18:22:36	2015-01-23	356000000000000	Halima	Malomo	Vg76	32	1	3	2	52	1	1	1	1		2	2	2	6	3	0	0	1	0	0		1	0	0	0	0	0	0	0	0	0	0	0	0
2	2015-01-23 13:14:50	2015-01-23 19:46:38	2015-01-23	360000000000000	Saukila	Malomo	Vg186	4	1	1	1	56	1	1	2	3		3	1	2	6	3	0	0	0	0	0		1	0	0	0	0	0	0	0	0	0	0	0	0
2	2015-01-23 13:16:18	2015-01-23 18:46:06	2015-01-23	359000000000000	Collins	Malomo	Vg175	3	1	3	2	30	1	1	2	1		4	2	0	6	3	0	0	0	0	0		1	0	0	0	0	0	0	0	0	0	0	0	0
2	2015-01-23 13:17:40	2015-01-23 18:32:35	2015-01-23	360000000000000	Kalua	MALOMO	Vg163	31	2	3	2	33	1	1	2	1		4	4	0	8	3	0	0	0	0	0		1	0	0	0	0	1	0	0	0	0	0	1	0		media\1422013098545.jpg	media\1422013116692.jpg
2	2015-01-23 13:24:17	2015-01-23 19:40:03	2015-01-23	358000000000000	Francis	Malomo	Vg231	11	1	3	2	28	1	1	2	1		3	3	0	6	3	0	0	0	0	0		1	0	0	0	0	0	0	0	0	0	0	0	0
2	2015-01-23 13:24:24	2015-01-23 18:22:56	2015-01-23	356000000000000	Halima	Malomo	Vg76	32	6	5	2	22	1	4	2	1		2	2	2	6	3	0	0	0	0	0		1	0	0	0	0	0	0	0	0	0	0	0	0
2	2015-01-23 13:25:51	2015-01-23 19:46:52	2015-01-23	360000000000000	Saukila	Malomo	Vg186	4	2	3	2	42	1	1	1	2		3	1	2	6	3	0	1	0	0	0		1	0	1	0	0	0	0	1	0	0	0	1	0		media\1422012906605.jpg	media\1422012918639.jpg
2	2015-01-23 13:26:19	2015-01-23 18:17:59	2015-01-23	359000000000000	Alex	Malomo	Vg218	20	1	3	2	26	1	1	3	1		3	2	0	5	3	0	0	0	0	0		1	0	0	0	0	0	0	0	0	0	0	1	0		media\1422012737896.jpg
2	2015-01-23 13:27:56	2015-01-23 18:46:43	2015-01-23	359000000000000	Collins	Malomo	Vg175	5	1	1	1	56	1	1	2	1		0	0	2	2	3	0	1	1	0	0		1	0	0	0	0	0	0	0	0	0	0	0	0
2	2015-01-23 13:29:48	2015-01-23 19:40:18	2015-01-23	358000000000000	Francis	Malomo	Vg231	11	2	1	1	34	1	1	3	1		3	3	0	6	3	0	0	0	0	0		1	0	0	0	0	0	0	0	0	0	0	0	0
2	2015-01-23 13:32:02	2015-01-23 18:47:09	2015-01-23	359000000000000	Collins	Malomo	Vg175	5	2	3	2	52	1	1	2	1		0	0	2	2	3	0	0	1	0	0		1	0	0	0	0	0	0	0	0	0	0	0	0
2	2015-01-23 13:44:09	2015-01-23 18:33:50	2015-01-23	360000000000000	Kalua	MALOMO	Vg163	31	3	5	1	19	1	4	2	5		4	4	0	8	3	0	0	0	0	0		1	0	0	0	0	0	0	0	0	0	0	0	0
2	2015-01-23 13:48:30	2015-01-23 18:57:02	2015-01-23	356000000000000	Maureen	Malomo	Vg191	22	2	3	2	34	1	1	1	2		3	3	0	6	3	0	0	0	0	0		1	0	0	0	0	0	0	0	0	0	0	0	0
2	2015-01-23 13:49:09	2015-01-23 18:47:40	2015-01-23	359000000000000	Collins	Malomo	Vg175	25	4	5	1	17	1	4	2	1		0	2	2	4	3	0	0	0	0	0		1	0	0	0	0	0	0	0	0	0	0	0	0
2	2015-01-23 13:49:32	2015-01-23 18:34:02	2015-01-23	360000000000000	Kalua	MALOMO	Vg163	41	1	1	1	59	1	1	1	1		2	2	2	6	3	0	0	0	0	0		1	0	0	0	0	0	0	0	0	0	0	0	0
2	2015-01-23 13:50:39	2015-01-23 19:04:23	2015-01-23	359000000000000	Valens	Malomo	Vg223	50	1	1	1	55	1	1	2	1		2	5	4	11	3	0	0	0	0	0		1	0	0	0	0	0	0	0	0	0	0	0	0
2	2015-01-23 13:51:09	2015-01-23 18:48:01	2015-01-23	359000000000000	Collins	Malomo	Vg175	25	3	5	1	23	1	4	2	1		0	2	2	4	3	0	0	0	0	0		1	0	0	0	0	0	0	0	0	0	0	0	0
2	2015-01-23 13:52:43	2015-01-23 19:41:12	2015-01-23	358000000000000	Francis	Malomo	Vg231	18	2	3	2	22	1	1	3	1		2	3	0	5	3	0	0	0	0	0		1	0	0	0	0	0	0	0	0	0	0	0	0
2	2015-01-23 13:54:23	2015-01-23 18:57:16	2015-01-23	356000000000000	Maureen	Malomo	Vg191	22	3	5	2	15	1	4	2	5		3	3	0	6	3	0	0	0	0	0		1	0	0	0	0	0	0	0	0	0	0	0	0
2	2015-01-23 13:55:46	2015-01-23 19:41:32	2015-01-23	358000000000000	Francis	Malomo	Vg231	18	3	1	1	26	1	1	3	1		2	3	0	5	3	0	0	0	0	0		1	0	0	0	0	0	0	0	0	0	0	0	0
2	2015-01-23 13:56:12	2015-01-23 19:04:08	2015-01-23	359000000000000	Valens	Malomo	Vg223	50	2	3	2	53	1	1	2	1		2	5	4	11	3	0	0	0	0	0		1	0	0	0	0	0	0	0	0	0	0	0	0
2	2015-01-23 13:57:14	2015-01-23 18:48:51	2015-01-23	359000000000000	Collins	Malomo	Vg175	25	2	3	2	55	1	1	1	1		0	2	2	4	3	0	0	0	0	0		1	0	0	0	0	0	0	0	0	0	0	0	0
2	2015-01-23 13:59:01	2015-01-23 18:57:32	2015-01-23	356000000000000	Maureen	Malomo	Vg191	22	1	1	1	39	1	1	2	2		3	3	0	6	3	0	0	0	0	0		1	0	0	0	0	0	0	0	0	0	0	0	0
2	2015-01-23 14:00:32	2015-01-23 18:23:52	2015-01-23	356000000000000	Halima	Malomo	Vg76	21	1	1	1	75	1	1	3	1		1	1	2	4	3	0	0	0	0	0		1	0	0	0	0	0	0	0	0	0	0	0	0
2	2015-01-23 14:07:13	2015-01-23 19:04:39	2015-01-23	359000000000000	Valens	Malomo	Vg223	50	10	7	1	49	1	1	2	3		2	5	4	11	3	0	0	1	1	0		1	0	0	0	0	0	0	0	0	0	0	1	0		media\1422015119293.jpg
2	2015-01-23 14:09:38	2015-01-23 18:43:12	2015-01-23	360000000000000	Patrick	Malomo	Vg150	7	3	6	1	20	1	4	3	1		1	3	0	4	3	0	0	0	0	0		1	0	0	0	0	0	0	0	0	0	0	0	0
2	2015-01-23 14:11:57	2015-01-23 18:26:05	2015-01-23	356000000000000	Halima	Malomo	Vg76	21	2	3	2	71	1	1	2	1		1	1	2	4	3	0	0	0	0	0		1	0	0	0	0	0	0	0	0	0	0	0	0
2	2015-01-23 14:15:01	2015-01-23 18:43:25	2015-01-23	360000000000000	Patrick	Malomo	Vg150	7	2	3	2	22	1	1	2	1		1	3	0	4	3	0	0	0	0	0		1	0	0	0	0	0	0	0	0	0	0	0	0
2	2015-01-23 14:17:11	2015-01-23 18:34:13	2015-01-23	360000000000000	Kalua	MALOMO	Vg163	41	2	3	2	42	1	1	1	1		2	2	2	6	3	0	0	0	0	0		1	0	0	0	0	0	0	0	0	0	0	0	0
2	2015-01-23 14:18:31	2015-01-23 18:43:45	2015-01-23	360000000000000	Patrick	Malomo	Vg150	7	1	1	1	30	1	1	3	1		1	3	0	4	3	0	0	0	0	0		1	0	0	0	0	0	0	0	0	0	0	0	0
2	2015-01-23 14:20:14	2015-01-23 19:41:53	2015-01-23	358000000000000	Francis	Malomo	Vg231	34	1	1	1	36	1	1	3	1		3	2	0	5	3	0	0	0	0	0		1	0	0	0	0	0	0	0	0	0	0	0	0
2	2015-01-23 14:20:46	2015-01-23 18:56:20	2015-01-23	358000000000000	Dalitso	Malomo	Vg42	8	1	1	1	58	1	1	2	1		1	6	3	10	3	0	0	0	0	0		1	0	0	0	0	0	0	0	0	0	0	0	0
2	2015-01-23 14:21:39	2015-01-23 18:34:52	2015-01-23	360000000000000	Kalua	MALOMO	Vg163	41	4	6	2	18	1	1	1	1		2	2	2	6	3	0	0	0	0	0		1	0	0	0	0	0	0	0	0	0	0	0	0
2	2015-01-23 14:23:47	2015-01-23 19:42:07	2015-01-23	358000000000000	Francis	Malomo	Vg231	34	2	3	2	30	1	1	2	1		3	2	0	5	3	0	0	0	0	0		1	0	0	0	0	0	0	0	0	0	0	0	0
2	2015-01-23 14:40:11	2015-01-23 18:56:35	2015-01-23	358000000000000	Dalitso	Malomo	Vg42	8	2	3	2	50	1	1	2	1		1	6	3	10	3	0	0	0	0	0		1	0	0	0	0	0	0	0	0	0	0	0	0
2	2015-01-23 14:50:29	2015-01-23 18:58:56	2015-01-23	356000000000000	Maureen	Malomo	Vg191	8	1	1	1	32	1	1	2	2		3	2	0	5	3	0	0	0	0	0		1	0	0	0	0	0	0	0	0	0	0	0	0
2	2015-01-23 14:53:17	2015-01-23 18:57:06	2015-01-23	358000000000000	Dalitso	Malomo	Vg42	8	4	5	2	22	1	4	3	1		1	6	3	10	3	0	0	0	0	0		1	0	0	0	0	0	0	0	0	0	0	0	0
2	2015-01-23 14:54:27	2015-01-23 19:00:19	2015-01-23	356000000000000	Maureen	Malomo	Vg191	8	2	3	2	28	1	1	2	1		3	2	0	5	3	0	0	0	0	0		1	0	0	0	0	0	0	0	0	0	0	0	0
2	2015-01-23 14:55:02	2015-01-23 19:36:29	2015-01-23	359000000000000	Gausi	Malomo	Vg35	37	1	1	1	67	1	1	1	1		3	0	2	5	3	0	0	0	0	0		1	0	0	0	0	0	0	0	0	0	0	0	0
2	2015-01-23 14:56:15	2015-01-23 19:06:56	2015-01-23	359000000000000	Valens	Malomo	Vg223	53	3	5	1	18	1	4	2	5		0	4	1	5	3	0	0	0	0	0		1	0	0	0	0	0	0	0	0	0	0	0	0
2	2015-01-23 14:57:15	2015-01-23 18:57:18	2015-01-23	358000000000000	Dalitso	Malomo	Vg42	8	5	5	1	19	1	4	2	5		1	6	3	10	3	0	0	0	0	0		1	0	0	0	0	0	0	0	0	1	0	0	0		media\1422018226782.jpg
2	2015-01-23 14:59:49	2015-01-23 19:36:53	2015-01-23	359000000000000	Gausi	Malomo	Vg35	37	2	3	2	63	1	1	2	1		3	0	2	5	3	0	0	0	0	0		1	0	0	0	0	0	0	0	0	0	0	0	0
2	2015-01-23 15:03:09	2015-01-23 19:00:36	2015-01-23	356000000000000	Maureen	Malomo	Vg191	5	1	1	1	33	1	1	2	2		3	2	0	5	3	0	0	0	0	0		1	0	0	0	0	0	0	0	0	0	0	0	0
2	2015-01-23 15:11:00	2015-01-23 19:25:09	2015-01-23	360000000000000	Eddah	Malomo	Vg35	34	1	1	1	36	1	1	3	1		4	4	1	9	3	0	0	0	0	0		1	0	0	0	0	0	0	0	0	0	0	0	0
2	2015-01-23 15:11:44	2015-01-23 19:00:53	2015-01-23	356000000000000	Maureen	Malomo	Vg191	5	2	3	2	29	1	1	2	2		3	2	0	5	3	0	0	0	0	0		1	0	0	0	0	0	0	0	0	0	0	0	0
2	2015-01-23 15:13:17	2015-01-23 19:07:31	2015-01-23	359000000000000	Valens	Malomo	Vg223	23	1	1	1	33	1	1	2	1		9	3	0	12	3	0	0	0	0	0		1	0	0	0	0	0	0	0	0	0	0	0	0
2	2015-01-23 15:18:32	2015-01-23 19:25:23	2015-01-23	360000000000000	Eddah	Malomo	Vg35	34	2	3	2	29	1	1	3	1		4	4	1	9	3	0	0	0	0	0		1	0	0	0	0	0	0	0	0	0	0	0	0
2	2015-01-23 15:21:50	2015-01-23 19:25:38	2015-01-23	360000000000000	Eddah	Malomo	Vg35	34	3	4	2	56	1	3	2	1		4	4	1	9	3	0	0	0	0	0		1	0	0	0	0	0	0	0	0	0	0	0	0
2	2015-01-23 15:36:22	2015-01-23 19:08:10	2015-01-23	359000000000000	Valens	Malomo	Vg223	11	2	3	2	64	1	1	1	1		0	0	2	2	3	0	0	0	0	0		1	0	0	0	0	0	0	0	0	0	0	0	0
2	2015-01-23 15:48:09	2015-01-23 18:29:49	2015-01-23	356000000000000	Halima	Malomo	Vg76	25	2	3	2	19	1	1	2	1		4	5	0	9	3	0	0	0	0	0		1	0	0	0	0	0	0	0	0	0	0	0	0
2	2015-01-23 15:55:03	2015-01-23 19:26:06	2015-01-23	360000000000000	Eddah	Malomo	Vg35	50	1	1	2	57	1	1	2	2		2	2	2	6	3	0	0	0	0	0		1	0	0	0	0	0	0	0	0	0	0	0	0
2	2015-01-23 16:01:11	2015-01-23 19:08:59	2015-01-23	359000000000000	Valens	Malomo	Vg223	3	1	1	2	57	1	2	2	1		1	2	1	4	3	0	1	0	0	0		1	0	0	0	0	0	0	0	0	0	0	0	0
2	2015-01-23 16:02:27	2015-01-23 19:26:17	2015-01-23	360000000000000	Eddah	Malomo	Vg35	50	2	5	2	27	1	2	3	1		2	2	2	6	3	0	0	0	0	0		1	0	0	0	0	0	0	0	0	0	0	0	0
2	2015-01-23 16:05:11	2015-01-23 18:31:06	2015-01-23	356000000000000	Halima	Malomo	Vg76	25	8	6	2	25	1	2	2	1		4	5	0	9	3	0	0	0	0	0		1	0	0	0	0	0	0	0	0	0	0	0	0
2	2015-01-23 16:06:14	2015-01-26 22:17:54	2015-01-23	360000000000000	Eddah	Malomo	Vg35	50	3	5	1	17	1	4	3	5		2	2	2	6	3	0	0	0	0	0		1	0	0	0	0	0	0	0	0	0	0	0	0
2	2015-01-23 16:20:18	2015-01-23 19:09:19	2015-01-23	359000000000000	Valens	Malomo	Vg223	23	2	3	2	32	1	1	2	1		9	3	0	12	3	0	0	0	0	0		1	0	0	0	0	0	0	0	0	0	0	0	0
2	2015-01-24 11:49:34	2015-01-25 16:01:20	2015-01-24	360000000000000	Saukila	Bowe	Vg88	66	2	3	2	26	1	1	2	1		2	2	0	4	3	0	0	0	0	0		1	0	0	0	0	0	0	0	0	0	0	0	0
2	2015-01-24 12:01:06	2015-01-25 15:20:38	2015-01-24	360000000000000	Patrick	Bowe	Vg114	8	2	3	2	21	1	1	2	1		2	2	0	4	3	0	0	0	0	0		1	0	0	0	0	0	0	0	0	0	0	0	0
2	2015-01-24 12:25:14	2015-01-25 15:59:52	2015-01-24	360000000000000	Saukila	Bowe	Vg88	28	2	6	1	18	1	4	2	1		0	2	0	2	3	0	0	0	0	0		1	0	0	0	0	0	0	0	0	0	0	0	0
2	2015-01-24 12:30:56	2015-01-25 15:21:27	2015-01-24	360000000000000	Patrick	Bowe	Vg32	14	2	3	2	39	1	1	2	3		1	1	1	3	3	0	0	0	0	0		1	0	0	0	0	0	0	0	0	0	0	0	0
2	2015-01-24 13:56:47	2015-01-25 15:22:07	2015-01-24	360000000000000	Patrick	Bowe	Vg29	6	1	1	1	32	1	1	2	1		3	5	0	8	3	0	0	0	0	0		1	0	0	0	0	0	0	0	0	0	0	0	0
2	2015-01-24 14:16:07	2015-01-25 15:23:15	2015-01-24	360000000000000	Patrick	Bowe	Vg29	6	4	3	2	29	1	1	2	1		3	5	0	8	3	0	0	0	0	0		1	0	0	0	0	0	0	0	0	0	0	0	0
2	2015-01-24 14:28:22	2015-01-25 15:15:50	2015-01-24	360000000000000	Saukila	Bowe	Vg3	19	1	1	1	29	1	1	2	3		3	2	0	5	3	0	0	0	0	0		1	0	0	0	0	0	0	0	0	0	0	0	0
2	2015-01-24 14:31:11	2015-01-25 15:16:18	2015-01-24	360000000000000	Saukila	Bowe	Vg3	19	2	3	2	26	1	1	2	1		3	2	0	5	3	0	0	0	0	0		1	0	0	0	0	0	0	0	0	0	0	0	0
2	2015-01-24 14:46:53	2015-01-25 15:24:55	2015-01-24	360000000000000	Patrick	Bowe	Vg29	5	2	3	2	42	1	1	2	1		3	2	2	7	3	0	0	0	0	0		1	0	0	0	0	0	0	0	0	0	0	0	0
2	2015-01-24 15:07:37	2015-01-25 15:17:03	2015-01-24	360000000000000	Saukila	Bowe	Vg105	35	2	3	2	20	1	1	2	2		1	2	0	3	3	0	0	0	0	0		1	0	0	0	0	0	0	0	0	0	0	0	0
2	2015-01-24 15:23:15	2015-01-25 15:25:58	2015-01-24	360000000000000	Patrick	Bowe	Vg29	15	4	5	1	17	1	4	2	1		0	2	2	4	3	0	0	1	0	0		1	0	0	0	0	0	0	0	0	0	0	0	0
2	2015-01-26 11:39:59	2015-01-27 18:47:21	2015-01-26	359000000000000	Phonex	Malomo	Vg203	10	3	5	1	33	1	2	2	1		4	2	1	7	3	0	0	0	0	0		1	0	0	0	0	0	0	0	0	0	0	0	0
2	2015-01-26 11:45:50	2015-01-27 18:47:39	2015-01-26	359000000000000	Phonex	Malomo	Vg203	10	1	1	2	72	1	3	2	1		4	2	1	7	3	0	0	0	0	0		1	0	0	0	0	0	0	0	0	0	0	0	0
2	2015-01-26 11:49:21	2015-01-27 18:47:53	2015-01-26	359000000000000	Phonex	Malomo	Vg203	10	3	5	2	33	1	2	3	1		4	2	1	7	3	0	0	0	0	0		1	0	0	0	0	0	0	0	0	0	0	0	0
2	2015-01-26 11:55:34	2015-01-26 22:11:09	2015-01-26	360000000000000	Eddah	Malomo	Vg35	15	3	5	1	18	1	4	2	5		4	5	2	11	3	0	0	0	0	0		1	0	0	0	0	0	0	0	0	0	0	0	0
2	2015-01-26 11:58:30	2015-01-26 22:11:23	2015-01-26	360000000000000	Eddah	Malomo	Vg35	15	4	5	2	16	1	4	2	5		4	5	2	11	3	0	0	0	0	0		1	0	0	0	0	0	0	0	0	0	0	0	0
2	2015-01-26 12:01:56	2015-01-26 22:11:36	2015-01-26	360000000000000	Eddah	Malomo	Vg35	15	6	5	2	18	1	4	2	5		4	5	2	11	3	0	0	0	0	0		1	0	0	0	0	0	0	0	0	0	0	0	0
2	2015-01-26 12:05:06	2015-01-26 22:11:48	2015-01-26	360000000000000	Eddah	Malomo	Vg35	15	7	5	1	15	1	4	2	5		4	5	2	11	3	0	0	0	0	0		1	0	0	0	0	0	0	0	0	0	0	0	0
2	2015-01-26 12:07:51	2015-01-26 22:12:03	2015-01-26	360000000000000	Eddah	Malomo	Vg35	15	11	5	2	21	1	4	3	1		4	5	2	11	3	0	0	0	0	0		1	0	0	0	0	0	0	0	0	0	0	0	0
2	2015-01-26 12:14:02	2015-01-26 22:25:35	2015-01-26	359000000000000	Gausi	Malomo	Vg67	3	1	1	1	50	1	1	2	1		2	1	2	5	3	0	0	0	0	0		1	0	0	0	0	0	0	0	0	0	0	0	0
2	2015-01-26 12:15:17	2015-01-27 18:51:33	2015-01-26	359000000000000	Phonex	Malomo	Vg203	8	1	1	1	29	1	1	3	1		2	2	0	4	3	0	0	0	0	0		1	0	0	0	0	0	0	0	0	0	0	0	0
2	2015-01-26 12:17:51	2015-01-27 18:51:52	2015-01-26	359000000000000	Phonex	Malomo	Vg203	8	2	3	2	26	1	1	2	1		2	2	0	4	3	0	0	0	0	0		1	0	0	0	0	0	0	0	0	0	0	0	0
2	2015-01-26 12:18:19	2015-01-26 22:12:14	2015-01-26	360000000000000	Eddah	Malomo	Vg35	15	2	6	1	40	1	1	2	1		4	5	2	11	3	0	0	0	0	0		1	0	0	0	0	0	0	0	0	0	0	0	0
2	2015-01-26 12:19:23	2015-01-27 19:00:00	2015-01-26	359000000000000	Valens	Malomo	Vg116	6	1	1	1	75	1	1	2	1		0	0	2	2	3	0	0	0	1	0		1	0	0	0	0	0	0	0	0	0	0	0	0
2	2015-01-26 12:26:26	2015-01-26 22:25:45	2015-01-26	359000000000000	Gausi	Malomo	Vg67	3	2	3	2	50	1	1	1	1		2	1	2	5	3	0	0	0	0	0		1	0	0	0	0	0	0	0	0	0	0	0	0
2	2015-01-26 12:30:56	2015-01-26 22:26:00	2015-01-26	359000000000000	Gausi	Malomo	Vg67	3	3	5	2	16	1	4	2	5		2	1	2	5	3	0	0	0	0	0		1	0	0	0	0	0	0	0	0	0	0	0	0
2	2015-01-26 12:34:13	2015-01-26 22:24:45	2015-01-26	358000000000000	Dalitso	Malomo	Vg42	10	2	3	2	25	1	1	2	1		3	2	0	5	3	0	0	0	0	0		1	0	0	0	0	0	0	0	0	0	0	0	0
2	2015-01-26 12:36:16	2015-01-27 21:06:44	2015-01-26	356000000000000	Halima	Malomo	Vg76	1	1	1	2	33	1	2	2	1		3	2	0	5	3	0	0	0	0	0		1	0	0	0	0	0	0	0	0	0	0	0	0
2	2015-01-26 12:37:08	2015-01-27 18:52:22	2015-01-26	359000000000000	Phonex	Malomo	Vg203	14	2	3	2	28	1	1	2	1		4	2	0	6	3	0	0	0	0	0		1	0	0	0	0	0	0	0	0	0	0	0	0
2	2015-01-26 12:37:54	2015-01-27 19:00:47	2015-01-26	359000000000000	Valens	Malomo	Vg116	5	1	1	1	25	1	1	2	2		3	2	0	5	3	0	0	0	0	0		1	0	0	0	0	0	0	0	0	0	0	0	0
2	2015-01-26 12:39:39	2015-01-26 22:12:48	2015-01-26	360000000000000	Eddah	Malomo	Vg35	8	1	1	1	44	1	1	2	1		5	2	3	10	3	0	0	0	0	0		1	0	0	0	0	0	0	0	0	0	0	0	0
2	2015-01-26 12:43:31	2015-01-27 18:27:02	2015-01-26	358000000000000	Francis	Malomo	Vg191	27	1	1	2	31	1	2	3	4		4	2	0	6	2	0	0	0	0	0		1	0	0	0	0	0	0	0	0	0	0	0	0
2	2015-01-26 12:43:41	2015-01-27 19:01:16	2015-01-26	359000000000000	Valens	Malomo	Vg116	5	2	3	2	24	1	1	2	1		3	2	0	5	3	0	0	0	0	0		1	0	0	0	0	0	0	0	0	0	0	0	0
2	2015-01-26 12:46:40	2015-01-26 20:13:12	2015-01-26	360000000000000	Patrick	Malomo	Vg83	4	2	3	2	53	1	1	2	1		4	2	2	8	3	0	0	0	0	0		1	0	0	0	0	0	0	0	0	0	0	0	0
2	2015-01-26 12:48:28	2015-01-27 18:53:20	2015-01-26	359000000000000	Phonex	Malomo	Vg203	17	1	1	1	23	1	1	2	1		1	2	0	3	3	0	0	0	0	0		1	0	0	0	0	0	0	0	0	0	0	0	0
2	2015-01-26 12:50:41	2015-01-26 20:13:35	2015-01-26	360000000000000	Patrick	Malomo	Vg83	4	1	1	1	57	1	1	2	1		4	2	2	8	3	0	0	0	0	0		1	0	0	0	0	0	0	0	0	0	0	0	0
2	2015-01-26 12:51:20	2015-01-27 18:53:36	2015-01-26	359000000000000	Phonex	Malomo	Vg203	17	2	3	2	20	1	1	2	1		1	2	0	3	3	0	0	0	0	0		1	0	0	0	0	0	0	0	0	0	0	0	0
2	2015-01-26 12:51:40	2015-01-26 22:28:03	2015-01-26	359000000000000	Gausi	Malomo	Vg67	10	1	1	2	43	1	2	1	1		4	3	1	8	3	0	0	0	0	0		1	0	0	0	0	0	0	0	0	0	0	0	0
2	2015-01-26 12:51:51	2015-01-27 21:07:02	2015-01-26	356000000000000	Halima	Malomo	Vg76	1	2	5	2	15	1	4	2	5		3	2	0	5	3	0	0	0	0	0		1	0	0	0	0	0	0	0	0	0	0	0	0
2	2015-01-26 12:56:01	2015-01-27 18:40:04	2015-01-26	359000000000000	Alex	Malomo	Vg90	25	2	3	2	61	1	1	1	1		0	0	2	2	3	0	0	0	0	0		1	0	0	0	0	0	0	0	0	0	0	0	0
2	2015-01-26 12:56:44	2015-01-28 18:48:20	2015-01-26	356000000000000	Halima	Malomo	Vg76	23	1	1	1	45	1	1	2	1		4	1	1	6	3	0	0	0	0	0		1	0	0	0	0	0	0	0	0	0	0	0	0
2	2015-01-26 13:07:02	2015-01-27 19:07:58	2015-01-26	359000000000000	Valens	Malomo	Vg116	8	2	3	2	19	1	1	2	1		1	2	0	3	3	0	0	0	0	0		1	0	0	0	0	0	0	0	0	0	0	0	0
2	2015-01-26 13:11:34	2015-01-26 22:14:47	2015-01-26	360000000000000	Eddah	Malomo	Vg35	8	4	6	1	51	1	3	1	other	Remittance	5	2	3	10	3	0	0	0	0	0		1	0	0	0	0	0	0	0	0	0	0	0	0
2	2015-01-26 13:14:26	2015-01-28 18:48:28	2015-01-26	356000000000000	Halima	Malomo	Vg76	23	2	3	2	39	1	1	2	1		4	1	1	6	3	0	0	0	0	0		1	0	0	0	0	0	0	0	0	0	0	0	0
2	2015-01-26 13:16:53	2015-01-27 18:54:48	2015-01-26	359000000000000	Phonex	Malomo	Vg203	27	2	3	2	24	1	1	2	1		1	2	0	3	3	0	0	0	0	0		1	0	0	0	0	0	0	0	0	0	0	0	0
2	2015-01-26 13:18:39	2015-01-26 22:14:58	2015-01-26	360000000000000	Eddah	Malomo	Vg35	8	3	4	2	65	1	3	1	1		5	2	3	10	3	0	0	0	0	0		1	0	0	0	0	0	0	0	0	0	0	0	0
2	2015-01-26 13:20:09	2015-01-27 19:10:32	2015-01-26	359000000000000	Valens	Malomo	Vg116	10	1	1	1	35	1	1	2	1		3	2	0	5	3	0	0	0	0	0		1	0	0	0	0	0	0	0	0	0	0	0	0
2	2015-01-26 13:21:16	2015-01-26 22:15:15	2015-01-26	360000000000000	Eddah	Malomo	Vg35	8	5	3	2	36	1	1	3	1		5	2	3	10	3	0	0	0	0	0		1	0	0	0	0	0	0	0	0	0	0	0	0
2	2015-01-26 13:24:12	2015-01-27 19:10:46	2015-01-26	359000000000000	Valens	Malomo	Vg116	10	2	3	2	30	1	1	2	1		3	2	0	5	3	0	0	0	0	0		1	0	0	0	0	0	0	0	0	0	0	0	0
2	2015-01-26 13:24:46	2015-01-28 18:48:34	2015-01-26	356000000000000	Halima	Malomo	Vg76	22	1	3	2	35	1	1	2	1		0	1	1	2	3	0	0	0	0	0		1	0	0	0	0	0	0	0	0	0	0	0	0
2	2015-01-26 13:26:24	2015-01-26 14:20:01	2015-01-26	360000000000000	Kalua	MALOMO	Vg163	43	1	1	1	28	1	1	2	1		5	2	0	7	3	0	0	0	0	0		1	0	0	0	0	0	0	0	0	0	0	0	0
2	2015-01-26 13:29:17	2015-01-28 18:48:41	2015-01-26	356000000000000	Halima	Malomo	Vg76	22	2	1	1	43	1	1	3	1		0	1	1	2	3	0	1	1	0	1	Flue	1	0	0	0	0	0	0	0	0	0	0	0	0
2	2015-01-26 13:30:53	2015-01-26 14:20:20	2015-01-26	360000000000000	Kalua	MALOMO	Vg163	43	2	3	2	22	1	1	1	1		5	2	0	7	3	0	0	0	0	0		1	0	0	0	0	0	0	0	0	0	0	0	0
2	2015-01-26 13:40:45	2015-01-27 18:30:49	2015-01-26	359000000000000	Collins	Malomo	Vg158	16	1	1	1	67	1	1	2	1		0	1	2	3	3	0	0	1	1	0		1	0	0	0	0	0	0	0	0	0	0	0	0
2	2015-01-26 13:41:22	2015-01-27 18:55:24	2015-01-26	359000000000000	Phonex	Malomo	Vg203	4	2	3	2	21	1	1	2	1		1	2	0	3	3	0	0	0	0	0		1	0	0	0	0	0	0	0	0	0	0	0	0
2	2015-01-26 13:44:06	2015-01-27 19:11:30	2015-01-26	359000000000000	Valens	Malomo	Vg116	19	1	1	1	40	1	1	2	1		7	4	1	12	3	0	0	0	0	0		1	0	0	0	0	0	0	0	0	0	0	0	0
2	2015-01-26 13:44:26	2015-01-27 18:31:04	2015-01-26	359000000000000	Collins	Malomo	Vg158	16	3	5	1	21	1	4	2	1		0	1	2	3	3	0	1	1	0	0		1	0	0	0	0	0	0	0	0	0	0	0	0
2	2015-01-26 13:48:14	2015-01-27 18:31:18	2015-01-26	359000000000000	Collins	Malomo	Vg158	16	2	3	2	63	1	1	2	1		0	1	2	3	3	0	0	0	0	0		1	0	0	0	0	0	0	0	0	0	0	0	0
2	2015-01-26 13:48:34	2015-01-27 19:11:45	2015-01-26	359000000000000	Valens	Malomo	Vg116	19	3	3	2	35	1	1	2	1		7	4	1	12	3	0	0	0	0	0		1	0	0	0	0	0	0	0	0	0	0	0	0
2	2015-01-26 13:49:38	2015-01-26 22:29:03	2015-01-26	359000000000000	Gausi	Malomo	Vg67	13	1	1	2	30	1	2	2	1		3	1	0	4	3	0	0	0	0	0		1	0	0	0	0	0	0	0	0	0	0	0	0
2	2015-01-26 13:52:20	2015-01-27 18:40:40	2015-01-26	359000000000000	Alex	Malomo	Vg90	36	3	5	1	19	1	1	2	1		3	2	2	7	3	0	0	0	0	0		1	0	0	0	0	0	0	0	0	0	0	1	0		media\1422273337725.jpg
2	2015-01-26 13:52:28	2015-01-27 19:12:01	2015-01-26	359000000000000	Valens	Malomo	Vg116	19	4	5	2	20	1	4	3	5		7	4	1	12	3	0	0	0	0	0		1	0	0	0	0	0	0	0	0	0	0	0	0
2	2015-01-26 13:52:28	2015-01-26 22:16:01	2015-01-26	360000000000000	Eddah	Malomo	Vg35	27	2	3	2	48	1	1	1	1		1	0	2	3	3	0	0	0	0	0		1	0	0	0	0	0	0	0	0	0	0	0	0
2	2015-01-26 13:56:23	2015-01-27 19:12:14	2015-01-26	359000000000000	Valens	Malomo	Vg116	19	2	3	2	38	1	1	2	1		7	4	1	12	3	0	0	0	0	0		1	0	0	0	0	0	0	0	0	0	0	0	0
2	2015-01-26 13:56:44	2015-01-26 22:25:39	2015-01-26	358000000000000	Dalitso	Malomo	Vg42	21	4	6	2	18	1	1	2	1		0	3	1	4	3	0	0	0	0	0		1	0	0	0	0	0	0	0	0	0	0	0	0
2	2015-01-26 13:59:34	2015-01-27 18:41:14	2015-01-26	359000000000000	Alex	Malomo	Vg90	36	2	3	2	45	1	1	1	1		3	2	2	7	3	0	0	0	0	0		1	0	0	0	0	0	0	0	0	0	0	0	0
2	2015-01-26 14:03:15	2015-01-27 18:32:40	2015-01-26	359000000000000	Collins	Malomo	Vg158	14	1	3	2	23	1	1	2	1		1	2	0	3	3	0	0	0	0	0		1	0	0	0	0	0	0	0	0	0	0	0	0
2	2015-01-26 14:07:24	2015-01-27 18:33:03	2015-01-26	359000000000000	Collins	Malomo	Vg158	14	2	1	1	25	1	1	2	1		1	2	0	3	3	0	0	0	0	0		1	0	0	0	0	0	0	0	0	0	0	0	0
2	2015-01-26 14:12:23	2015-01-27 18:57:33	2015-01-26	359000000000000	Phonex	Malomo	Vg203	6	6	5	2	30	1	1	2	2		3	2	1	6	3	0	0	0	0	0		1	0	0	0	0	0	0	0	0	0	0	0	0
2	2015-01-26 14:12:31	2015-01-26 22:29:26	2015-01-26	359000000000000	Gausi	Malomo	Vg67	20	2	3	2	28	1	1	2	1		2	2	0	4	3	0	0	0	0	0		1	0	0	0	0	0	0	0	0	0	0	0	0
2	2015-01-26 14:14:54	2015-01-27 18:33:39	2015-01-26	359000000000000	Collins	Malomo	Vg158	19	1	1	1	27	1	1	2	1		2	2	0	4	3	0	0	1	0	0		1	0	0	0	0	0	0	0	0	0	0	0	0
2	2015-01-26 14:27:38	2015-01-27 19:16:13	2015-01-26	359000000000000	Valens	Malomo	Vg116	20	3	3	2	20	1	1	2	1		3	2	1	6	3	0	0	0	0	0		1	0	0	0	0	0	0	0	0	0	0	0	0
2	2015-01-26 14:28:15	2015-01-26 22:29:53	2015-01-26	359000000000000	Gausi	Malomo	Vg67	23	1	1	1	36	1	1	1	1		4	2	0	6	3	0	0	0	0	0		1	0	0	0	0	0	0	0	0	0	0	0	0
2	2015-01-26 14:30:57	2015-01-26 22:30:16	2015-01-26	359000000000000	Gausi	Malomo	Vg67	23	2	3	2	30	1	1	1	1		4	2	0	6	3	0	0	0	0	0		1	0	0	0	0	0	0	0	0	0	0	0	0
2	2015-01-26 14:35:26	2015-01-27 18:58:16	2015-01-26	359000000000000	Phonex	Malomo	Vg203	24	1	1	1	36	1	1	2	1		1	2	0	3	3	0	0	0	0	0		1	0	0	0	0	0	0	0	0	0	0	0	0
2	2015-01-26 14:38:21	2015-01-27 18:58:37	2015-01-26	359000000000000	Phonex	Malomo	Vg203	24	2	3	2	33	1	1	2	1		1	2	0	3	3	0	0	0	0	0		1	0	0	0	0	0	0	0	0	0	0	0	0
2	2015-01-26 14:47:47	2015-01-26 22:31:05	2015-01-26	359000000000000	Gausi	Malomo	Vg67	30	1	1	1	45	1	1	2	1		2	2	2	6	3	0	0	0	0	0		1	0	0	0	0	0	0	0	0	0	0	0	0
2	2015-01-26 14:48:48	2015-01-27 19:16:46	2015-01-26	359000000000000	Valens	Malomo	Vg116	23	1	1	1	25	1	1	2	1		2	2	0	4	3	0	0	0	0	0		1	0	0	0	0	0	0	0	0	0	0	0	0
2	2015-01-26 14:52:52	2015-01-26 22:31:17	2015-01-26	359000000000000	Gausi	Malomo	Vg67	30	2	3	2	40	1	1	2	1		2	2	2	6	3	0	0	0	0	0		1	0	0	0	0	0	0	0	0	0	0	0	0
2	2015-01-26 14:52:53	2015-01-27 18:34:56	2015-01-26	359000000000000	Collins	Malomo	Vg158	21	2	1	1	39	1	1	2	1		4	3	0	7	3	0	0	0	0	0		1	0	0	0	0	0	0	0	0	0	0	0	0
2	2015-01-26 14:53:02	2015-01-27 19:17:05	2015-01-26	359000000000000	Valens	Malomo	Vg116	23	2	3	2	23	1	1	2	1		2	2	0	4	3	0	0	0	0	0		1	0	0	0	0	0	0	0	0	0	0	0	0
2	2015-01-26 14:57:36	2015-01-27 18:35:18	2015-01-26	359000000000000	Collins	Malomo	Vg158	21	1	3	2	36	1	1	2	1		4	3	0	7	3	0	0	0	0	0		1	0	0	0	0	0	0	0	0	0	0	0	0
2	2015-01-26 15:01:00	2015-01-28 18:48:49	2015-01-26	356000000000000	Halima	Malomo	Vg223	3	2	6	2	15	1	4	2	5		1	2	1	4	3	0	0	0	0	0		1	0	0	0	0	0	0	0	0	0	0	0	0
2	2015-01-26 15:03:25	2015-01-26 22:16:12	2015-01-26	360000000000000	Eddah	Malomo	Vg35	40	1	1	1	74	1	1	2	1		0	2	2	4	3	0	0	0	0	0		1	0	0	0	0	0	0	0	0	0	0	0	0
2	2015-01-26 15:07:23	2015-01-26 22:16:23	2015-01-26	360000000000000	Eddah	Malomo	Vg35	40	2	3	2	65	1	1	1	1		0	2	2	4	3	0	0	0	0	0		1	0	0	0	0	0	0	0	0	0	0	0	0
2	2015-01-26 15:10:08	2015-01-27 18:35:40	2015-01-26	359000000000000	Collins	Malomo	Vg158	24	1	1	1	21	1	1	1	1		3	2	0	5	3	0	0	0	0	0		1	0	0	0	0	0	0	0	0	0	0	0	0
2	2015-01-26 15:11:26	2015-01-26 22:16:37	2015-01-26	360000000000000	Eddah	Malomo	Vg35	40	3	5	2	21	1	4	1	1		0	2	2	4	3	0	0	0	0	0		1	0	0	0	0	0	0	0	0	0	0	0	0
2	2015-01-26 15:13:19	2015-01-27 18:36:07	2015-01-26	359000000000000	Collins	Malomo	Vg158	24	2	3	2	25	1	1	2	1		3	2	0	5	3	0	1	1	0	0		1	0	0	0	0	0	0	0	0	0	0	0	0
2	2015-01-26 15:13:53	2015-01-26 22:17:02	2015-01-26	360000000000000	Eddah	Malomo	Vg35	40	4	6	2	21	1	4	2	5		0	2	2	4	3	0	0	0	0	0		1	0	0	0	0	0	0	0	0	0	0	0	0
2	2015-01-26 15:14:01	2015-01-26 22:32:13	2015-01-26	359000000000000	Gausi	Malomo	Vg67	31	2	3	2	64	1	1	1	1		2	1	2	5	3	0	0	0	0	0		1	0	0	0	0	0	0	0	0	0	0	1	0		media\1422278255333.jpg
2	2015-01-26 15:16:54	2015-01-27 19:17:21	2015-01-26	359000000000000	Valens	Malomo	Vg116	2	1	1	1	42	1	1	2	1		3	5	2	10	3	0	0	0	0	0		1	0	0	0	0	0	0	0	0	0	0	0	0
2	2015-01-26 15:19:02	2015-01-27 18:45:21	2015-01-26	359000000000000	Alex	Malomo	Vg90	11	2	3	2	25	1	1	2	1		2	2	0	4	3	0	0	0	0	0		1	0	0	0	0	0	0	0	0	0	0	0	0
2	2015-01-26 15:23:16	2015-01-26 20:18:40	2015-01-26	360000000000000	Patrick	Malomo	Vg83	13	2	3	2	27	1	1	3	1		2	2	0	4	3	0	0	0	0	0		1	0	0	0	0	0	0	0	0	0	0	0	0
2	2015-01-26 15:24:48	2015-01-27 18:27:24	2015-01-26	358000000000000	Francis	Malomo	Vg143	28	1	1	1	70	1	1	1	1		0	0	2	2	3	0	0	0	0	0		1	0	0	0	0	0	0	0	0	0	0	0	0
2	2015-01-26 15:27:06	2015-01-27 19:17:36	2015-01-26	359000000000000	Valens	Malomo	Vg116	2	2	3	2	40	1	1	2	1		3	5	2	10	3	0	0	0	0	0		1	0	0	0	0	0	0	0	0	0	0	0	0
2	2015-01-26 15:29:12	2015-01-27 18:36:32	2015-01-26	359000000000000	Collins	Malomo	Vg158	29	2	3	2	32	1	1	2	1		6	2	0	8	3	0	1	0	0	0		1	0	0	0	0	0	0	0	0	0	0	0	0
2	2015-01-26 15:32:24	2015-01-27 18:36:48	2015-01-26	359000000000000	Collins	Malomo	Vg158	29	1	1	1	34	1	1	2	1		6	2	0	8	3	0	0	0	0	0		1	0	0	0	0	0	0	0	0	0	0	0	0
2	2015-01-26 15:32:52	2015-01-27 18:25:37	2015-01-26	356000000000000	Maureen	Malomo	Vg143	10	1	1	1	76	1	1	2	1		0	1	3	4	3	0	0	0	0	0		1	0	0	0	0	0	0	0	0	0	0	0	0
2	2015-01-26 15:33:07	2015-01-27 18:27:35	2015-01-26	358000000000000	Francis	Malomo	Vg143	28	2	3	2	52	1	1	2	1		0	0	2	2	3	0	0	0	0	0		1	0	0	0	0	0	0	0	0	0	0	1	0		media\1422279370537.jpg
2	2015-01-26 15:34:32	2015-01-27 18:45:42	2015-01-26	359000000000000	Alex	Malomo	Vg90	22	1	1	1	28	1	1	2	1		3	2	0	5	3	0	0	0	0	0		1	0	0	0	0	0	0	0	0	0	0	0	0
2	2015-01-26 15:35:18	2015-01-26 20:19:38	2015-01-26	360000000000000	Patrick	Malomo	Vg83	10	1	1	1	30	1	1	3	1		1	4	0	5	3	0	0	0	0	0		1	0	0	0	0	0	0	0	0	0	0	0	0
2	2015-01-26 15:35:19	2015-01-27 18:25:51	2015-01-26	356000000000000	Maureen	Malomo	Vg143	10	4	3	2	45	1	1	1	1		0	1	3	4	3	0	0	0	0	0		1	0	0	0	0	0	0	0	0	0	0	0	0
2	2015-01-26 15:35:53	2015-01-27 19:17:52	2015-01-26	359000000000000	Valens	Malomo	Vg116	2	3	5	1	22	1	4	2	1		3	5	2	10	3	0	0	0	0	0		1	0	0	0	0	0	0	0	0	0	0	0	0
2	2015-01-26 15:39:50	2015-01-27 18:45:55	2015-01-26	359000000000000	Alex	Malomo	Vg90	22	2	3	2	20	1	1	2	1		3	2	0	5	3	0	0	0	0	0		1	0	0	0	0	0	0	0	0	0	0	0	0
2	2015-01-26 15:40:35	2015-01-26 20:21:27	2015-01-26	360000000000000	Patrick	Malomo	Vg83	10	2	3	2	28	1	1	3	1		1	4	0	5	3	0	0	0	0	0		1	0	0	0	0	0	0	0	0	0	0	0	0
2	2015-01-26 15:45:18	2015-01-26 20:21:39	2015-01-26	360000000000000	Patrick	Malomo	Vg83	10	3	6	1	25	1	4	2	1		1	4	0	5	3	0	0	0	0	0		1	0	0	0	0	0	0	0	0	0	0	0	0
2	2015-01-26 15:48:27	2015-01-27 18:26:09	2015-01-26	356000000000000	Maureen	Malomo	Vg143	17	1	1	1	39	1	1	2	1		5	4	0	9	3	0	0	0	0	0		1	0	0	0	0	0	0	0	0	0	0	0	0
2	2015-01-26 15:50:02	2015-01-27 18:37:14	2015-01-26	359000000000000	Collins	Malomo	Vg158	5	4	5	1	15	1	4	2	5		4	3	0	7	3	0	0	0	0	0		1	0	0	0	0	0	0	0	0	0	0	0	0
2	2015-01-26 15:51:00	2015-01-28 18:48:56	2015-01-26	356000000000000	Halima	Malomo	Vg218	20	2	1	1	30	1	1	2	1		3	2	0	5	3	0	0	0	0	0		1	0	0	0	0	0	0	0	0	0	0	0	0
2	2015-01-26 15:53:48	2015-01-27 18:26:20	2015-01-26	356000000000000	Maureen	Malomo	Vg143	17	2	3	2	37	1	1	2	1		5	4	0	9	3	0	0	0	0	0		1	0	0	0	0	0	0	0	0	0	0	0	0
2	2015-01-26 15:56:41	2015-01-27 18:37:41	2015-01-26	359000000000000	Collins	Malomo	Vg158	5	2	3	2	31	1	1	2	1		4	3	0	7	3	0	0	0	0	0		1	0	0	0	0	0	0	0	0	0	0	0	0
2	2015-01-26 16:06:07	2015-01-27 18:38:13	2015-01-26	359000000000000	Collins	Malomo	Vg158	8	4	6	2	16	1	4	2	5		1	3	0	4	3	0	0	0	0	0		1	0	0	0	0	0	0	0	0	0	0	0	0
2	2015-01-26 16:07:33	2015-01-27 18:26:50	2015-01-26	356000000000000	Maureen	Malomo	Vg143	23	2	3	2	18	1	1	2	1		0	2	0	2	3	0	0	0	0	0		1	0	0	0	0	0	0	0	0	0	0	0	0
2	2015-01-26 16:10:48	2015-01-27 18:38:27	2015-01-26	359000000000000	Collins	Malomo	Vg158	8	1	3	2	24	1	1	2	1		1	3	0	4	3	0	0	0	0	0		1	0	0	0	0	0	0	0	0	0	0	0	0
2	2015-01-26 16:14:03	2015-01-27 18:38:41	2015-01-26	359000000000000	Collins	Malomo	Vg158	8	2	1	1	32	1	1	2	1		1	3	0	4	3	0	0	0	0	0		1	0	0	0	0	0	0	0	0	0	0	0	0
2	2015-01-26 16:14:08	2015-01-28 18:49:02	2015-01-26	356000000000000	Halima	Malomo	Vg218	11	1	1	1	69	1	1	2	1		0	0	2	2	3	0	0	0	0	0		1	0	0	0	0	0	0	0	0	0	0	0	0
2	2015-01-26 16:14:44	2015-01-27 19:18:07	2015-01-26	359000000000000	Valens	Malomo	Vg116	2	4	5	2	19	1	2	2	1		3	5	2	10	3	0	0	0	0	0		1	0	0	0	0	0	0	0	0	0	0	0	0
2	2015-01-26 16:18:37	2015-01-27 18:27:10	2015-01-26	356000000000000	Maureen	Malomo	Vg143	24	1	1	1	32	1	1	2	2		3	2	0	5	3	0	0	0	0	0		1	0	0	0	0	0	0	0	0	0	0	0	0
2	2015-01-26 16:25:55	2015-01-27 18:27:23	2015-01-26	356000000000000	Maureen	Malomo	Vg143	24	2	3	2	32	1	1	2	1		3	2	0	5	3	0	0	0	0	0		1	0	0	0	0	0	0	0	0	0	0	0	0
2	2015-01-26 16:28:47	2015-01-28 18:49:09	2015-01-26	356000000000000	Halima	Malomo	Vg218	11	2	3	2	65	1	1	2	1		0	0	2	2	3	0	1	1	1	0		1	0	1	0	0	0	0	0	0	1	0	1	1	Ventolin inhaler ( 1 tube)	media\1422286235619.jpg	media\1422286268893.jpg	media\1422286386129.jpg
2	2015-01-26 16:40:56	2015-01-27 18:27:53	2015-01-26	356000000000000	Maureen	Malomo	Vg143	13	2	3	2	21	1	1	2	1		1	2	0	3	3	0	0	0	0	0		1	0	0	0	0	0	0	0	0	0	0	0	0
2	2015-01-26 17:01:46	2015-01-27 19:18:54	2015-01-26	359000000000000	Valens	Malomo	Vg116	2	6	5	1	15	1	4	2	5		3	5	2	10	3	0	1	1	0	0		1	0	1	0	0	0	0	0	0	1	0	0	0		media\1422284675527.jpg
2	2015-01-26 17:06:49	2015-01-27 18:28:05	2015-01-26	356000000000000	Maureen	Malomo	Vg143	14	1	1	1	35	1	1	3	2		5	2	0	7	3	0	0	0	0	0		1	0	0	0	0	0	0	0	0	0	0	0	0
2	2015-01-26 17:11:26	2015-01-27 18:28:20	2015-01-26	356000000000000	Maureen	Malomo	Vg143	14	2	3	2	29	1	1	2	1		5	2	0	7	3	0	0	0	0	0		1	0	0	0	0	0	0	0	0	0	0	1	0		media\1422285297900.jpg	media\1422285308197.jpg
2	2015-01-27 12:44:27	2015-01-27 20:36:39	2015-01-27	360000000000000	Eddah	Malomo	Vg169	5	1	1	1	23	1	1	3	2		1	4	0	5	3	0	0	0	0	0		1	0	0	0	0	0	0	0	0	0	0	0	0
2	2015-01-27 12:53:59	2015-01-27 20:37:07	2015-01-27	360000000000000	Eddah	Malomo	Vg169	5	2	3	2	22	1	1	1	1		1	4	0	5	3	0	0	0	0	0		1	0	0	0	0	0	0	0	0	0	0	0	0
2	2015-01-27 12:57:34	2015-01-27 20:58:16	2015-01-27	358000000000000	Dalitso	Malomo	Vg181	43	2	3	2	21	1	1	2	other	House wife	1	3	0	4	3	0	0	0	0	0		1	0	0	0	0	0	0	0	0	0	0	0	0
2	2015-01-27 12:59:05	2015-01-27 20:37:54	2015-01-27	360000000000000	Eddah	Malomo	Vg169	5	4	6	1	16	1	4	2	5		1	4	0	5	3	0	0	0	0	0		1	0	0	0	0	0	0	0	0	0	0	0	0
2	2015-01-27 14:27:15	2015-01-27 20:15:03	2015-01-27	360000000000000	Patrick	Malomo	Vg130	6	1	1	1	57	1	1	2	1		0	2	2	4	3	0	0	0	0	0		1	0	0	0	0	0	0	0	0	0	0	0	0
2	2015-01-27 14:31:51	2015-01-27 20:15:23	2015-01-27	360000000000000	Patrick	Malomo	Vg130	6	2	3	2	53	1	1	2	1		0	2	2	4	3	0	0	0	0	0		1	0	0	0	0	0	0	0	0	0	0	0	0
2	2015-01-27 14:32:34	2015-01-27 21:08:03	2015-01-27	356000000000000	Halima	Malomo	Vg130	9	1	1	1	22	1	1	2	1		2	2	0	4	3	0	0	0	0	0		1	0	0	0	0	0	0	0	0	0	0	0	0
2	2015-01-27 14:56:28	2015-01-27 21:08:25	2015-01-27	356000000000000	Halima	Malomo	Vg130	9	2	3	2	19	1	1	2	1		2	2	0	4	3	0	0	0	0	0		1	0	0	0	0	0	0	0	0	0	0	0	0
2	2015-01-27 15:16:31	2015-01-27 21:09:04	2015-01-27	356000000000000	Halima	Malomo	Vg130	19	2	3	2	35	1	1	2	1		3	3	0	6	3	0	0	0	0	0		1	0	0	0	0	0	0	0	0	0	0	0	0
2	2015-01-27 15:20:11	2015-01-27 20:16:13	2015-01-27	360000000000000	Patrick	Malomo	Vg130	24	1	1	1	66	1	1	2	1		2	1	2	5	3	0	0	0	0	0		1	0	0	0	0	0	0	0	0	0	0	0	0
2	2015-01-27 15:26:21	2015-01-27 21:09:24	2015-01-27	356000000000000	Halima	Malomo	Vg130	19	1	1	1	38	1	1	3	1		3	3	0	6	3	0	0	0	0	0		1	0	0	0	0	0	0	0	0	0	0	0	0
2	2015-01-27 16:35:59	2015-01-27 20:59:41	2015-01-27	358000000000000	Dalitso	Malomo	Vg210	2	2	3	2	22	1	1	2	1		2	2	0	4	3	0	0	0	0	0		1	0	0	0	0	0	0	0	0	0	0	0	0
2	2015-01-27 16:54:52	2015-01-27 21:24:44	2015-01-27	360000000000000	Kalua	MALOMO	Vg58	9	2	3	2	26	1	1	2	1		2	2	0	4	3	0	0	0	0	0		1	0	0	0	0	0	0	0	0	0	0	0	0
2	2015-01-27 16:58:05	2015-01-27 21:25:13	2015-01-27	360000000000000	Kalua	MALOMO	Vg58	9	1	1	1	36	1	1	3	1		2	2	0	4	3	0	0	0	0	0		1	0	0	0	0	0	0	0	0	0	0	0	0
2	2015-01-27 17:09:23	2015-01-27 21:11:08	2015-01-27	356000000000000	Halima	Malomo	Vg58	24	2	3	2	42	1	1	2	1		6	1	2	9	3	0	0	0	0	0		1	0	0	0	0	0	0	0	0	0	0	0	0
2	2015-01-27 17:11:02	2015-01-27 21:26:31	2015-01-27	360000000000000	Kalua	MALOMO	Vg58	8	1	1	1	28	1	1	2	1		2	2	0	4	3	0	0	0	0	0		1	0	0	0	0	0	0	0	0	0	0	0	0
2	2015-01-27 17:12:48	2015-01-27 21:17:43	2015-01-27	360000000000000	Saukila	Malomo	Vg58	20	4	5	2	20	1	4	2	1		2	1	1	4	3	0	0	0	0	0		1	0	0	0	0	0	0	0	0	0	0	0	0
2	2015-01-27 17:13:40	2015-01-27 20:42:55	2015-01-27	360000000000000	Eddah	Malomo	Vg58	19	1	1	1	36	1	1	3	3		4	2	0	6	3	0	0	0	0	0		1	0	0	0	0	0	0	0	0	0	0	0	0
2	2015-01-27 17:21:17	2015-01-27 20:43:24	2015-01-27	360000000000000	Eddah	Malomo	Vg58	19	2	3	2	28	1	1	2	1		4	2	0	6	3	0	0	0	0	0		1	0	0	0	0	0	0	0	0	0	0	0	0
2	2015-01-27 17:21:43	2015-01-27 21:19:16	2015-01-27	360000000000000	Saukila	Malomo	Vg58	4	1	1	1	42	1	2	2	1		0	0	1	1	3	0	0	0	0	0		1	0	0	0	0	0	0	0	0	0	0	0	0
2	2015-01-27 17:27:48	2015-01-27 20:26:54	2015-01-27	359000000000000	Gausi	Malomo	Vg58	14	1	1	2	32	1	2	2	1		5	3	2	10	3	0	0	0	0	0		1	0	0	0	0	0	0	0	0	0	0	0	0
2	2015-01-27 17:40:49	2015-01-27 20:29:08	2015-01-27	359000000000000	Gausi	Malomo	Vg58	14	9	4	2	51	1	1	1	1		5	3	2	10	3	0	0	0	0	0		1	0	0	0	0	0	0	0	0	0	0	0	0
2	2015-01-27 17:43:16	2015-01-27 20:29:44	2015-01-27	359000000000000	Gausi	Malomo	Vg58	14	10	6	2	65	1	2	1	1		5	3	2	10	3	0	0	0	0	0		1	0	0	0	0	0	0	0	0	0	0	0	0
2	2015-01-28 10:59:24	2015-01-28 18:28:26	2015-01-28	359000000000000	Collins	Malambo	Vg9	11	2	3	2	37	1	1	2	1		5	0	3	8	3	0	0	0	0	0		1	0	0	0	0	0	0	0	0	0	0	0	0
2	2015-01-28 11:11:23	2015-01-28 18:13:02	2015-01-28	360000000000000	Patrick	Malambo	Vg7	9	6	5	1	16	1	4	2	1		3	4	2	9	3	0	0	1	0	0		1	0	0	0	0	0	0	0	0	0	0	1	0		media\1422436747380.jpg
2	2015-01-28 11:16:51	2015-01-28 17:49:49	2015-01-28	360000000000000	Eddah	Malambo	Vg5	3	1	1	2	79	1	3	1	1		0	1	1	2	3	0	0	0	0	0		1	0	0	0	0	0	0	0	0	0	0	0	0
2	2015-01-28 11:18:07	2015-01-28 18:04:02	2015-01-28	359000000000000	Gausi	Malambo	Vg52	9	1	1	2	52	1	2	1	1		1	1	1	3	3	0	0	0	0	0		1	0	0	0	0	0	0	0	0	0	0	0	0
2	2015-01-28 11:20:16	2015-01-28 18:57:50	2015-01-28	358000000000000	Francis	Malambo	Vg55	28	6	5	2	18	1	4	2	1		3	2	1	6	3	0	0	0	0	0		1	0	0	0	0	0	0	0	0	0	0	0	0
2	2015-01-28 11:21:58	2015-01-28 18:04:31	2015-01-28	359000000000000	Gausi	Malambo	Vg52	9	2	5	2	23	1	2	2	1		1	1	1	3	3	0	0	0	0	0		1	0	0	0	0	0	0	0	0	0	0	0	0
2	2015-01-28 11:22:06	2015-01-28 18:33:22	2015-01-28	360000000000000	Kalua	MALAMBO	Vg50	30	2	1	2	51	1	2	2	1		1	1	2	4	3	0	0	0	0	0		1	0	0	0	0	0	0	0	0	0	0	0	0
2	2015-01-28 11:23:46	2015-01-28 18:29:40	2015-01-28	359000000000000	Collins	Malambo	Vg9	24	1	3	2	22	1	1	2	1		2	2	0	4	3	0	0	0	0	0		1	0	0	0	0	0	0	0	0	0	0	0	0
2	2015-01-28 11:28:54	2015-01-28 18:13:29	2015-01-28	360000000000000	Patrick	Malambo	Vg7	9	4	5	2	20	1	2	2	1		3	4	2	9	3	0	0	0	0	0		1	0	0	0	0	0	0	0	0	0	0	0	0
2	2015-01-28 11:38:30	2015-01-28 18:58:12	2015-01-28	358000000000000	Francis	Malambo	Vg55	27	1	1	1	32	1	4	2	1		0	1	1	2	3	0	0	0	0	0		1	0	0	0	0	0	0	0	0	0	0	1	0		media\1422438265449.jpg
2	2015-01-28 11:40:50	2015-01-28 18:30:49	2015-01-28	359000000000000	Collins	Malambo	Vg9	17	1	1	2	52	1	3	1	1		0	3	1	4	3	0	0	0	0	0		1	0	0	0	0	0	0	0	0	0	0	0	0
2	2015-01-28 11:41:34	2015-01-28 17:53:09	2015-01-28	359000000000000	Alex	Malambo	Vg54	22	4	5	2	20	1	4	2	5		2	2	2	6	3	0	0	0	0	0		1	0	0	0	0	0	0	0	0	0	0	0	0
2	2015-01-28 11:44:28	2015-01-28 18:43:26	2015-01-28	358000000000000	Dalitso	Malomo	Vg48	3	3	5	1	21	1	4	3	1		2	4	1	7	3	0	0	0	0	0		1	0	0	0	0	0	0	0	0	0	0	0	0
2	2015-01-28 11:45:54	2015-01-28 18:31:07	2015-01-28	359000000000000	Collins	Malambo	Vg9	17	2	5	2	21	1	4	2	5		0	3	1	4	3	0	0	0	0	0		1	0	0	0	0	0	0	0	0	0	0	0	0
2	2015-01-28 11:46:00	2015-01-28 18:49:43	2015-01-28	356000000000000	Halima	Malambo	Vg18	10	1	1	1	23	1	1	2	1		0	3	0	3	3	0	0	0	0	0		1	0	0	0	0	0	0	0	0	0	0	0	0
2	2015-01-28 11:46:43	2015-01-28 18:14:01	2015-01-28	360000000000000	Patrick	Malambo	Vg7	9	2	3	2	40	1	1	3	1		3	4	2	9	3	0	0	0	0	0		1	0	0	0	0	0	0	0	0	0	0	0	0
2	2015-01-28 11:48:24	2015-01-28 18:31:24	2015-01-28	359000000000000	Collins	Malambo	Vg9	17	3	5	1	15	1	4	2	5		0	3	1	4	3	0	0	0	0	0		1	0	0	0	0	0	0	0	0	0	0	0	0
2	2015-01-28 11:50:12	2015-01-28 18:33:12	2015-01-28	359000000000000	Collins	Malambo	Vg9	17	4	5	1	21	1	4	3	1		0	3	1	4	3	0	0	0	0	0		1	0	0	0	0	0	0	0	0	0	0	0	0
2	2015-01-28 11:51:24	2015-01-28 18:33:48	2015-01-28	360000000000000	Kalua	MALAMBO	Vg50	13	1	1	2	66	1	3	1	1		3	1	1	5	3	0	0	0	0	0		1	0	0	0	0	0	0	0	0	0	0	0	0
2	2015-01-28 11:51:43	2015-01-28 18:05:00	2015-01-28	359000000000000	Gausi	Malambo	Vg52	12	2	3	2	46	1	1	1	2		4	1	2	7	3	0	0	0	0	0		1	0	0	0	0	0	0	0	0	0	0	0	0
2	2015-01-28 11:57:20	2015-01-28 17:55:43	2015-01-28	360000000000000	Eddah	Malambo	Vg5	12	3	6	2	19	1	4	1	1		0	1	2	3	3	0	0	0	0	0		1	0	0	0	0	0	0	0	0	0	0	0	0
2	2015-01-28 11:59:27	2015-01-28 17:54:18	2015-01-28	359000000000000	Alex	Malambo	Vg54	25	1	5	1	38	1	4	2	1		2	1	1	4	3	0	0	0	0	0		1	0	0	0	0	0	0	0	0	0	0	0	0
2	2015-01-28 12:00:15	2015-01-28 18:50:06	2015-01-28	356000000000000	Halima	Malambo	Vg18	10	2	3	2	20	1	1	2	1		0	3	0	3	3	0	0	0	0	0		1	0	0	0	0	0	0	0	0	0	0	0	0
2	2015-01-28 12:03:55	2015-01-28 18:08:08	2015-01-28	359000000000000	Valens	Malambo	Vg28	21	1	1	1	34	1	1	2	1		1	2	0	3	3	0	0	0	0	0		1	0	0	0	0	0	0	0	0	0	0	0	0
2	2015-01-28 12:06:17	2015-01-28 18:34:11	2015-01-28	359000000000000	Collins	Malambo	Vg9	8	1	1	2	49	1	3	2	1		6	2	1	9	3	0	1	0	0	0		1	0	0	0	0	0	0	0	0	0	0	0	0
2	2015-01-28 12:08:33	2015-01-28 18:50:48	2015-01-28	356000000000000	Halima	Malambo	Vg18	9	2	3	2	21	1	1	2	1		1	2	0	3	3	0	0	0	0	0		1	0	0	0	0	0	0	0	0	0	0	0	0
2	2015-01-28 12:09:50	2015-01-28 18:15:03	2015-01-28	360000000000000	Patrick	Malambo	Vg7	15	2	3	2	47	1	1	2	1		1	0	2	3	3	0	0	0	0	0		1	0	0	0	0	0	0	0	0	0	0	0	0
2	2015-01-28 12:11:01	2015-01-28 18:08:52	2015-01-28	359000000000000	Valens	Malambo	Vg28	21	3	3	2	22	1	1	2	1		1	2	0	3	3	0	0	0	0	0		1	0	0	0	0	0	0	0	0	0	0	0	0
2	2015-01-28 12:11:20	2015-01-28 18:34:13	2015-01-28	360000000000000	Kalua	MALAMBO	Vg50	12	1	1	1	40	1	1	3	1		3	4	2	9	3	0	0	0	0	0		1	0	0	0	0	0	0	0	0	0	0	0	0
2	2015-01-28 12:12:42	2015-01-28 18:35:29	2015-01-28	359000000000000	Collins	Malambo	Vg9	8	5	5	2	22	1	2	2	1		6	2	1	9	3	0	0	0	0	0		1	0	0	0	0	0	0	0	0	0	0	0	0
2	2015-01-28 12:12:48	2015-01-28 18:42:57	2015-01-28	359000000000000	Phonex	Malambo	Vg27	11	2	3	2	49	1	1	2	1		1	2	2	5	3	0	0	0	0	0		1	0	0	0	0	0	0	0	0	0	0	0	0
2	2015-01-28 12:17:13	2015-01-28 18:50:58	2015-01-28	356000000000000	Halima	Malambo	Vg18	9	1	1	1	30	1	1	2	1		1	2	0	3	3	0	0	0	0	0		1	0	0	0	0	0	0	0	0	0	0	0	0
2	2015-01-28 12:19:38	2015-01-28 17:57:10	2015-01-28	360000000000000	Eddah	Malomo	Vg5	12	2	4	2	70	1	3	1	other	Remittance	0	1	2	3	3	0	0	0	0	0		1	0	0	0	0	0	0	0	0	0	0	0	0
2	2015-01-28 12:20:49	2015-01-28 18:44:30	2015-01-28	358000000000000	Dalitso	Malomo	Vg48	21	1	1	1	32	1	1	3	4		3	2	0	5	3	0	0	0	0	0		1	0	0	0	0	0	0	0	0	0	0	0	0
2	2015-01-28 12:25:02	2015-01-28 18:06:19	2015-01-28	359000000000000	Gausi	Malambo	Vg52	17	1	1	1	55	1	1	2	1		3	1	2	6	3	0	0	0	0	0		1	0	0	0	0	0	0	0	0	0	0	0	0
2	2015-01-28 12:26:36	2015-01-28 18:43:24	2015-01-28	359000000000000	Phonex	Malambo	Vg27	11	4	5	2	23	1	1	3	1		1	2	2	5	3	0	0	0	0	0		1	0	0	0	0	0	0	0	0	0	0	0	0
2	2015-01-28 12:26:44	2015-01-28 18:36:03	2015-01-28	359000000000000	Collins	Malambo	Vg9	6	1	1	1	40	1	1	3	1		4	3	1	8	3	0	0	0	0	0		1	0	0	0	0	0	0	0	0	0	0	0	0
2	2015-01-28 12:28:14	2015-01-28 18:59:16	2015-01-28	358000000000000	Francis	Malambo	Vg55	19	1	3	2	23	1	1	2	1		2	2	0	4	3	0	0	0	0	0		1	0	0	0	0	0	0	0	0	0	0	0	0
2	2015-01-28 12:29:28	2015-01-28 18:06:31	2015-01-28	359000000000000	Gausi	Malambo	Vg52	17	2	3	2	41	1	1	1	1		3	1	2	6	3	0	0	0	0	0		1	0	0	0	0	0	0	0	0	0	0	0	0
2	2015-01-28 12:30:29	2015-01-28 18:36:17	2015-01-28	359000000000000	Collins	Malambo	Vg9	6	6	5	2	15	1	4	2	5		4	3	1	8	3	0	0	0	0	0		1	0	0	0	0	0	0	0	0	0	0	0	0
2	2015-01-28 12:31:00	2015-01-28 18:34:55	2015-01-28	360000000000000	Kalua	MALAMBO	Vg50	12	4	5	2	20	1	4	3	5		3	4	2	9	3	0	0	0	0	0		1	0	0	0	0	0	0	0	0	0	0	0	0
2	2015-01-28 12:32:18	2015-01-28 18:36:55	2015-01-28	359000000000000	Collins	Malambo	Vg9	6	2	3	2	38	1	1	2	1		4	3	1	8	3	0	0	0	0	0		1	0	0	0	0	0	0	0	0	0	0	0	0
2	2015-01-28 12:33:08	2015-01-28 18:06:59	2015-01-28	359000000000000	Gausi	Malambo	Vg52	17	3	5	2	15	1	4	2	5		3	1	2	6	3	0	0	0	0	0		1	0	0	0	0	0	0	0	0	0	0	0	0
2	2015-01-28 12:34:37	2015-01-28 18:09:38	2015-01-28	359000000000000	Valens	Malambo	Vg28	3	1	1	1	81	1	1	1	1		0	0	2	2	3	0	0	0	0	0		1	0	0	0	0	0	0	0	0	0	0	0	0
2	2015-01-28 12:35:04	2015-01-28 18:44:42	2015-01-28	358000000000000	Dalitso	Malomo	Vg48	21	2	3	2	30	1	1	2	2		3	2	0	5	3	0	0	0	0	0		1	0	0	0	0	1	0	0	0	0	0	1	0		media\1422441583406.jpg
2	2015-01-28 12:36:32	2015-01-28 18:52:01	2015-01-28	356000000000000	Halima	Malambo	Vg18	11	2	3	2	21	1	1	2	1		3	2	0	5	3	0	0	0	0	0		1	0	0	0	0	0	0	0	0	0	0	0	0
2	2015-01-28 12:38:15	2015-01-28 17:57:44	2015-01-28	360000000000000	Eddah	Malambo	Vg5	14	1	1	1	68	1	3	1	1		0	1	1	2	3	0	0	0	0	0		1	0	0	0	0	0	0	0	0	0	0	0	0
2	2015-01-28 12:38:55	2015-01-28 18:20:17	2015-01-28	360000000000000	Patrick	Malambo	Vg7	5	1	1	1	38	1	1	2	1		3	3	0	6	3	0	0	0	0	0		1	0	0	0	0	0	0	0	0	0	0	0	0
2	2015-01-28 12:39:17	2015-01-28 18:00:15	2015-01-28	359000000000000	Alex	Malambo	Vg54	3	2	3	2	34	1	1	2	1		2	4	0	6	3	0	0	0	0	0		1	0	0	0	0	0	0	0	0	0	0	0	0
2	2015-01-28 12:40:38	2015-01-28 18:37:54	2015-01-28	359000000000000	Collins	Malambo	Vg9	8	4	5	1	18	1	4	2	2		6	2	1	9	3	0	1	1	0	0		1	0	0	0	0	0	0	0	0	0	0	0	0
2	2015-01-28 12:40:56	2015-01-28 18:43:41	2015-01-28	359000000000000	Phonex	Malambo	Vg27	16	2	3	2	25	1	1	2	1		4	2	0	6	3	0	0	0	0	0		1	0	0	0	0	0	0	0	0	0	0	0	0
2	2015-01-28 12:44:01	2015-01-28 17:58:26	2015-01-28	360000000000000	Eddah	Malambo	Vg5	14	2	5	1	16	1	4	2	1		0	1	1	2	3	0	0	0	0	0		1	0	0	0	0	0	0	0	0	0	0	0	0
2	2015-01-28 12:51:18	2015-01-28 17:44:49	2015-01-28	356000000000000	Maureen	Malambo	Vg23	13	2	3	2	42	1	1	1	1		4	2	2	8	3	0	0	1	0	0		1	0	0	0	0	0	0	0	0	0	0	0	0
2	2015-01-28 12:53:09	2015-01-28 18:37:40	2015-01-28	360000000000000	Kalua	MALAMBO	Vg50	4	1	1	2	57	1	3	2	1		3	1	1	5	3	0	0	0	0	0		1	0	0	0	0	0	0	0	0	0	0	0	0
2	2015-01-28 12:55:33	2015-01-28 17:45:10	2015-01-28	356000000000000	Maureen	Malambo	Vg23	13	4	5	1	18	1	4	3	5		4	2	2	8	3	0	0	0	0	0		1	0	0	0	0	0	0	0	0	0	0	0	0
2	2015-01-28 12:56:10	2015-01-28 18:59:43	2015-01-28	358000000000000	Francis	Malambo	Vg55	3	1	3	2	62	1	1	2	1		1	0	2	3	3	0	0	0	0	0		1	0	0	0	0	0	0	0	0	0	0	0	0
2	2015-01-28 12:56:50	2015-01-28 18:39:02	2015-01-28	359000000000000	Collins	Malambo	Vg9	19	2	3	2	33	1	1	1	1		2	2	1	5	3	0	1	0	0	0		1	0	0	0	0	0	0	0	0	0	0	0	0
2	2015-01-28 12:57:23	2015-01-28 18:37:58	2015-01-28	360000000000000	Kalua	MALAMBO	Vg50	4	2	5	2	23	1	2	2	1		3	1	1	5	3	0	0	0	0	0		1	0	0	0	0	0	0	0	0	0	0	0	0
2	2015-01-28 12:58:07	2015-01-28 18:07:56	2015-01-28	359000000000000	Gausi	Malambo	Vg52	4	1	1	1	76	1	1	3	1		0	1	2	3	3	0	0	0	0	0		1	0	0	0	0	0	0	0	0	0	0	0	0
2	2015-01-28 12:59:35	2015-01-28 18:39:25	2015-01-28	359000000000000	Collins	Malambo	Vg9	19	3	5	1	16	1	1	2	5		2	2	1	5	3	0	1	1	0	0		1	0	0	0	0	0	0	0	0	0	0	0	0
2	2015-01-28 12:59:58	2015-01-28 18:44:09	2015-01-28	359000000000000	Phonex	Malambo	Vg27	13	1	1	1	74	1	1	2	1		1	0	2	3	3	0	0	0	0	0		1	0	0	0	0	0	0	0	0	0	0	0	0
2	2015-01-28 13:00:13	2015-01-28 18:21:29	2015-01-28	360000000000000	Patrick	Malambo	Vg7	3	3	5	2	18	1	4	2	1		5	3	0	8	3	0	0	0	0	0		1	0	0	0	0	0	0	0	0	0	0	0	0
2	2015-01-28 13:02:30	2015-01-28 18:00:26	2015-01-28	360000000000000	Eddah	Malambo	Vg5	10	1	1	1	30	1	1	2	3		2	2	0	4	3	0	0	0	0	0		1	0	0	0	0	0	0	0	0	0	0	0	0
2	2015-01-28 13:03:14	2015-01-28 17:45:30	2015-01-28	356000000000000	Maureen	Malambo	Vg23	13	3	5	1	23	1	4	2	1		4	2	2	8	3	0	0	0	0	0		1	0	0	0	0	0	0	0	0	0	0	0	0
2	2015-01-28 13:03:16	2015-01-28 18:08:24	2015-01-28	359000000000000	Gausi	Malambo	Vg52	4	2	3	2	72	1	1	1	1		0	1	2	3	3	0	0	0	0	0		1	0	0	0	0	0	0	0	0	0	0	1	0		media\1422443239514.jpg
2	2015-01-28 13:06:57	2015-01-28 19:00:03	2015-01-28	358000000000000	Francis	Malambo	Vg55	31	1	1	1	77	1	1	2	1		1	0	2	3	3	0	0	0	0	0		1	0	0	0	0	1	0	0	0	0	0	1	0		media\1422443482546.jpg
2	2015-01-28 13:07:42	2015-01-28 18:00:41	2015-01-28	360000000000000	Eddah	Malambo	Vg5	10	2	3	2	28	1	1	3	1		2	2	0	4	3	0	0	0	0	0		1	0	0	0	0	0	0	0	0	0	0	0	0
2	2015-01-28 13:11:11	2015-01-28 18:22:02	2015-01-28	360000000000000	Patrick	Malambo	Vg7	3	1	1	1	37	1	1	2	1		5	3	0	8	3	0	0	0	0	0		1	0	0	0	0	0	0	0	0	0	0	0	0
2	2015-01-28 13:11:51	2015-01-28 18:11:04	2015-01-28	359000000000000	Valens	Malambo	Vg28	17	1	1	1	75	1	1	2	1		0	0	2	2	3	0	0	0	0	0		1	0	0	0	0	0	0	0	0	0	0	0	0
2	2015-01-28 13:13:16	2015-01-28 17:46:40	2015-01-28	356000000000000	Maureen	Malambo	Vg23	12	1	1	1	28	1	1	1	1		3	2	0	5	3	0	0	0	0	0		1	0	0	0	0	0	0	0	0	0	0	0	0
2	2015-01-28 13:14:47	2015-01-28 19:00:19	2015-01-28	358000000000000	Francis	Malambo	Vg55	31	2	3	2	51	1	1	2	1		1	0	2	3	3	0	0	0	0	0		1	0	0	0	0	0	0	0	0	0	0	0	0
2	2015-01-28 13:17:44	2015-01-28 18:53:14	2015-01-28	356000000000000	Halima	Malambo	Vg18	24	2	3	2	34	1	1	2	1		14	7	1	22	3	0	0	0	0	0		1	0	0	0	0	0	0	0	0	0	0	0	0
2	2015-01-28 13:19:46	2015-01-28 18:38:24	2015-01-28	360000000000000	Kalua	MALAMBO	Vg50	15	2	3	2	35	1	1	2	4		5	2	2	9	3	0	0	0	0	0		1	0	0	0	0	0	0	0	0	0	0	0	0
2	2015-01-28 13:22:07	2015-01-28 18:40:58	2015-01-28	359000000000000	Collins	Malambo	Vg9	23	1	3	2	42	1	1	2	1		1	0	2	3	3	0	0	0	0	0		1	0	0	0	0	0	0	0	0	0	0	0	0
2	2015-01-28 13:22:17	2015-01-28 17:47:12	2015-01-28	356000000000000	Maureen	Malambo	Vg23	12	2	3	2	26	1	1	2	1		3	2	0	5	3	0	0	0	0	0		1	0	0	0	0	0	0	0	0	0	0	0	0
2	2015-01-28 13:22:50	2015-01-28 18:44:46	2015-01-28	359000000000000	Phonex	Malambo	Vg27	7	1	1	2	38	1	2	2	1		0	2	0	2	3	0	0	0	0	0		1	0	0	0	0	0	0	0	0	0	0	0	0
2	2015-01-28 13:23:50	2015-01-28 18:38:34	2015-01-28	360000000000000	Kalua	MALAMBO	Vg50	15	3	6	2	70	1	3	2	1		5	2	2	9	3	0	0	0	0	0		1	0	0	0	0	0	0	0	0	0	0	0	0
2	2015-01-28 13:23:59	2015-01-28 18:08:57	2015-01-28	359000000000000	Gausi	Malambo	Vg52	13	1	1	1	35	1	1	2	1		5	3	0	8	3	0	0	0	0	0		1	0	0	0	0	0	0	0	0	0	0	0	0
2	2015-01-28 13:27:19	2015-01-28 17:34:46	2015-01-28	360000000000000	Saukila	Malambo	Vg47	21	6	7	1	25	1	4	2	1		3	3	0	6	3	0	0	0	0	0		1	0	0	0	0	0	0	0	0	0	0	0	0
2	2015-01-28 13:27:29	2015-01-28 18:24:50	2015-01-28	360000000000000	Patrick	Malambo	Vg7	10	2	3	2	21	1	1	2	1		0	2	0	2	3	0	0	1	1	0		1	0	0	0	0	0	0	0	0	0	0	0	0
2	2015-01-28 13:27:49	2015-01-28 18:44:55	2015-01-28	359000000000000	Phonex	Malambo	Vg27	7	2	5	1	15	1	4	2	1		0	2	0	2	3	0	0	0	0	0		1	0	0	0	0	0	0	0	0	0	0	0	0
2	2015-01-28 13:29:04	2015-01-28 18:09:11	2015-01-28	359000000000000	Gausi	Malambo	Vg52	13	2	3	2	27	1	1	2	1		5	3	0	8	3	0	0	0	0	0		1	0	0	0	0	0	0	0	0	0	0	1	0		media\1422445104244.jpg
2	2015-01-28 13:31:00	2015-01-28 17:35:08	2015-01-28	360000000000000	Saukila	Malambo	Vg47	21	2	3	2	22	1	1	2	1		3	3	0	6	3	0	0	0	0	0		1	0	0	0	0	0	0	0	0	0	0	0	0
2	2015-01-28 13:35:54	2015-01-28 18:39:10	2015-01-28	360000000000000	Kalua	MALAMBO	Vg50	7	1	1	1	43	1	1	2	1		5	2	1	8	3	0	0	0	0	0		1	0	0	0	0	0	0	0	0	0	0	0	0
2	2015-01-28 13:37:59	2015-01-28 17:48:18	2015-01-28	356000000000000	Maureen	Malambo	Vg23	6	1	1	2	56	1	3	1	1		1	0	1	2	3	0	0	0	0	0		1	0	0	0	0	0	0	0	0	0	0	0	0
2	2015-01-28 13:38:19	2015-01-28 18:01:35	2015-01-28	360000000000000	Eddah	Malambo	Vg5	24	2	3	2	18	1	1	1	1		0	2	0	2	3	0	0	0	0	0		1	0	0	0	0	0	0	0	0	0	0	0	0
2	2015-01-28 13:38:41	2015-01-28 18:09:30	2015-01-28	359000000000000	Gausi	Malambo	Vg52	13	8	3	2	27	1	1	2	1		5	3	0	8	3	0	0	0	0	0		1	0	0	0	0	0	0	0	0	0	0	0	0
2	2015-01-28 13:40:19	2015-01-28 17:35:42	2015-01-28	360000000000000	Saukila	Malambo	Vg47	19	1	1	2	62	1	3	1	1		0	0	1	1	3	0	0	0	0	0		1	0	0	0	0	0	0	0	0	0	0	0	0
2	2015-01-28 13:41:14	2015-01-28 18:45:23	2015-01-28	359000000000000	Phonex	Malambo	Vg27	3	1	1	1	35	1	1	2	1		4	2	0	6	3	0	0	0	0	0		1	0	0	0	0	0	0	0	0	0	0	0	0
2	2015-01-28 13:41:54	2015-01-28 18:53:43	2015-01-28	356000000000000	Halima	Malambo	Vg18	24	22	6	1	20	1	4	2	1		14	7	1	22	3	0	0	0	0	0		1	0	0	0	0	0	0	0	0	0	0	0	0
2	2015-01-28 13:42:51	2015-01-28 18:25:34	2015-01-28	360000000000000	Patrick	Malambo	Vg7	27	1	1	1	37	1	2	3	1		2	2	0	4	3	0	0	0	0	0		1	0	0	0	0	0	0	0	0	0	0	0	0
2	2015-01-28 13:43:40	2015-01-28 18:39:33	2015-01-28	360000000000000	Kalua	MALAMBO	Vg50	7	3	5	2	16	1	4	2	5		5	2	1	8	3	0	0	0	0	0		1	0	0	0	0	0	0	0	0	0	0	0	0
2	2015-01-28 13:45:07	2015-01-28 18:41:40	2015-01-28	359000000000000	Collins	Malambo	Vg9	12	2	5	1	15	1	4	2	5		0	1	2	3	3	0	0	0	0	0		1	0	0	0	0	0	0	0	0	0	0	0	0
2	2015-01-28 13:45:50	2015-01-28 18:45:32	2015-01-28	359000000000000	Phonex	Malambo	Vg27	3	2	3	2	34	1	1	1	1		4	2	0	6	3	0	0	0	0	0		1	0	0	0	0	0	0	0	0	0	0	0	0
2	2015-01-28 13:46:05	2015-01-28 18:53:56	2015-01-28	356000000000000	Halima	Malambo	Vg18	24	13	5	2	16	1	4	2	5		14	7	1	22	3	0	0	0	0	0		1	0	0	0	0	0	0	0	0	0	0	0	0
2	2015-01-28 13:47:26	2015-01-28 18:25:55	2015-01-28	360000000000000	Patrick	Malambo	Vg7	27	2	6	1	18	1	4	3	1		2	2	0	4	3	0	0	0	0	0		1	0	0	0	0	0	0	0	0	0	0	0	0
2	2015-01-28 13:48:51	2015-01-28 18:11:56	2015-01-28	359000000000000	Valens	Malambo	Vg28	27	2	3	2	18	1	1	2	1		1	3	0	4	3	0	0	0	0	0		1	0	0	0	0	0	0	0	0	0	0	0	0
2	2015-01-28 13:49:01	2015-01-28 18:39:42	2015-01-28	360000000000000	Kalua	MALAMBO	Vg50	5	1	1	1	26	1	1	2	1		1	2	0	3	3	0	0	0	0	0		1	0	0	0	0	0	0	0	0	0	0	0	0
2	2015-01-28 13:51:11	2015-01-28 17:40:01	2015-01-28	360000000000000	Saukila	Malambo	Vg47	10	1	1	1	52	1	1	2	1		3	4	2	9	3	0	0	0	0	0		1	0	0	0	0	0	0	0	0	0	0	0	0
2	2015-01-28 13:52:52	2015-01-28 18:54:12	2015-01-28	356000000000000	Halima	Malambo	Vg18	24	4	3	2	30	1	1	1	1		14	7	1	22	3	0	0	0	0	0		1	0	0	0	0	0	0	0	0	0	0	0	0
2	2015-01-28 13:53:02	2015-01-28 18:39:53	2015-01-28	360000000000000	Kalua	MALAMBO	Vg50	5	2	3	2	22	1	1	2	1		1	2	0	3	3	0	0	0	0	0		1	0	0	0	0	0	0	0	0	0	0	0	0
2	2015-01-28 13:54:45	2015-01-28 18:02:12	2015-01-28	360000000000000	Eddah	Malambo	Vg5	23	2	5	2	18	1	4	1	1		0	2	0	2	3	0	0	0	0	0		1	0	0	0	0	0	0	0	0	0	0	0	0
2	2015-01-28 13:55:27	2015-01-28 17:48:44	2015-01-28	356000000000000	Maureen	Malambo	Vg23	9	2	3	2	32	1	1	2	1		3	2	0	5	3	0	0	0	0	0		1	0	0	0	0	0	0	0	0	0	0	0	0
2	2015-01-28 13:57:18	2015-01-28 18:54:24	2015-01-28	356000000000000	Halima	Malambo	Vg18	24	5	6	2	92	1	3	1	1		14	7	1	22	3	0	0	0	0	0		1	0	0	0	0	0	0	0	0	0	0	0	0
2	2015-01-28 14:02:06	2015-01-28 17:40:23	2015-01-28	360000000000000	Saukila	Malambo	Vg47	10	3	5	1	24	1	4	3	1		3	4	2	9	3	0	0	0	0	0		1	0	0	0	0	0	0	0	0	0	0	0	0
2	2015-01-28 14:05:31	2015-01-28 18:45:55	2015-01-28	359000000000000	Phonex	Malambo	Vg27	25	1	1	2	38	1	2	3	1		3	2	0	5	3	0	0	1	1	0		1	0	0	0	1	0	0	0	0	0	0	1	0		media\1422447226705.jpg
2	2015-01-28 14:07:46	2015-01-28 17:41:14	2015-01-28	360000000000000	Saukila	Malambo	Vg47	10	6	5	2	16	1	4	3	5		3	4	2	9	3	0	0	0	0	0		1	0	0	0	0	0	0	0	0	0	0	0	0
2	2015-01-28 14:16:54	2015-01-28 18:54:59	2015-01-28	356000000000000	Halima	Malambo	Vg18	18	1	3	2	35	1	1	1	1		3	4	0	7	3	0	0	0	0	0		1	0	0	0	0	0	0	0	0	0	0	0	0
2	2015-01-28 14:18:44	2015-01-28 18:26:53	2015-01-28	360000000000000	Patrick	Malambo	Vg7	21	2	3	2	27	1	1	2	2		2	2	0	4	3	0	0	0	0	0		1	0	0	0	0	0	0	0	0	0	0	0	0
2	2015-01-28 14:18:47	2015-01-28 18:02:34	2015-01-28	360000000000000	Eddah	Malambo	Vg5	29	1	1	1	56	1	1	2	2		3	1	2	6	3	0	0	0	0	0		1	0	0	0	0	0	0	0	0	0	0	0	0
2	2015-01-28 14:21:17	2015-01-28 18:48:35	2015-01-28	360000000000000	Saukila	Malambo	Vg47	12	1	1	1	34	1	1	2	1		5	2	0	7	3	0	0	0	0	0		1	0	0	0	0	0	0	0	0	0	0	0	0
2	2015-01-28 14:24:42	2015-01-28 18:02:45	2015-01-28	360000000000000	Eddah	Malambo	Vg5	29	2	3	2	46	1	1	1	1		3	1	2	6	3	0	0	1	0	0		1	0	0	0	0	1	0	0	0	0	0	1	0		media\1422448326378.jpg
2	2015-01-28 14:24:48	2015-01-28 18:55:24	2015-01-28	356000000000000	Halima	Malambo	Vg18	18	3	5	2	16	1	4	3	5		3	4	0	7	3	0	0	0	0	0		1	0	0	0	0	0	0	0	0	0	0	0	0
2	2015-01-28 14:25:42	2015-01-28 18:27:34	2015-01-28	360000000000000	Patrick	Malambo	Vg7	29	2	3	2	38	1	1	2	2		3	3	1	7	3	0	0	0	0	0		1	0	0	0	0	0	0	0	0	0	0	0	0
2	2015-01-28 14:25:49	2015-01-28 17:49:42	2015-01-28	356000000000000	Maureen	Malambo	Vg23	14	2	3	2	31	1	1	3	1		5	2	0	7	3	0	0	0	0	0		1	0	0	0	0	0	0	0	0	0	0	0	0
2	2015-01-28 14:26:58	2015-01-28 18:13:29	2015-01-28	359000000000000	Valens	Malambo	Vg28	37	3	3	2	26	1	1	2	1		2	2	0	4	3	0	0	0	0	0		1	0	0	0	0	0	0	0	0	0	0	0	0
2	2015-01-28 14:27:40	2015-01-28 18:48:56	2015-01-28	360000000000000	Saukila	Malambo	Vg47	12	2	3	2	29	1	1	2	1		5	2	0	7	3	0	0	0	0	0		1	0	0	0	0	0	0	0	0	0	0	0	0
2	2015-01-28 14:27:50	2015-01-28 18:55:35	2015-01-28	356000000000000	Halima	Malambo	Vg18	18	4	5	2	15	1	4	2	5		3	4	0	7	3	0	0	0	0	0		1	0	0	0	0	0	0	0	0	0	0	0	0
2	2015-01-28 14:28:27	2015-01-28 19:00:47	2015-01-28	358000000000000	Francis	Malambo	Vg55	4	2	3	2	39	1	1	2	1		3	3	1	7	3	0	0	0	0	0		1	0	0	0	0	0	0	0	0	0	0	0	0
2	2015-01-28 14:30:05	2015-01-28 17:49:55	2015-01-28	356000000000000	Maureen	Malambo	Vg23	14	1	1	1	37	1	3	3	2		5	2	0	7	3	0	0	0	0	0		1	0	0	0	0	0	0	0	0	0	0	0	0
2	2015-01-28 14:31:34	2015-01-28 18:55:48	2015-01-28	356000000000000	Halima	Malambo	Vg18	21	1	1	1	46	1	1	2	1		5	2	1	8	3	0	0	0	0	0		1	0	0	0	0	0	0	0	0	0	0	0	0
2	2015-01-28 14:31:50	2015-01-28 19:01:04	2015-01-28	358000000000000	Francis	Malambo	Vg55	4	4	5	2	18	1	4	3	5		3	3	1	7	3	0	0	0	0	0		1	0	0	0	0	0	0	0	0	0	0	0	0
2	2015-01-28 14:32:03	2015-01-28 18:06:24	2015-01-28	359000000000000	Alex	Malambo	Vg54	18	2	3	2	44	1	1	2	1		4	3	2	9	3	0	0	0	0	0		1	0	0	0	0	0	0	0	0	0	0	0	0
2	2015-01-28 14:35:05	2015-01-28 18:45:37	2015-01-28	358000000000000	Dalitso	Malambo	Vg48	51	1	1	1	35	1	1	3	4		4	2	0	6	3	0	0	0	0	0		1	0	0	0	0	0	0	0	0	0	0	0	0
2	2015-01-28 14:35:50	2015-01-28 18:10:03	2015-01-28	359000000000000	Gausi	Malambo	Vg52	20	2	3	2	26	1	1	2	1		1	2	0	3	3	0	0	0	0	0		1	0	0	0	0	0	0	0	0	0	0	0	0
2	2015-01-28 14:37:50	2015-01-28 18:46:17	2015-01-28	359000000000000	Phonex	Malambo	Vg27	22	1	1	1	46	1	1	2	1		3	1	1	5	3	0	0	0	0	0		1	0	0	0	0	0	0	0	0	0	0	0	0
2	2015-01-28 14:42:29	2015-01-28 18:55:57	2015-01-28	356000000000000	Halima	Malambo	Vg18	21	2	3	2	35	1	1	2	1		5	2	1	8	3	0	0	0	0	0		1	0	0	0	0	0	0	0	0	0	0	0	0
2	2015-01-28 14:42:42	2015-01-28 18:46:27	2015-01-28	359000000000000	Phonex	Malambo	Vg27	22	2	3	2	38	1	1	1	1		3	1	1	5	3	0	0	0	0	0		1	0	0	0	0	1	0	0	0	0	0	1	0		media\1422449280195.jpg
2	2015-01-28 14:46:00	2015-01-28 18:14:02	2015-01-28	359000000000000	Valens	Malambo	Vg28	35	1	1	1	21	1	1	3	5		1	2	0	3	3	0	0	0	0	0		1	0	0	0	0	0	0	0	0	0	0	0	0
2	2015-01-28 14:46:14	2015-01-28 18:56:07	2015-01-28	356000000000000	Halima	Malambo	Vg18	21	3	5	1	15	1	4	2	1		5	2	1	8	3	0	0	0	0	0		1	0	0	0	0	0	0	0	0	0	0	0	0
2	2015-01-28 14:54:33	2015-01-28 18:14:17	2015-01-28	359000000000000	Valens	Malambo	Vg28	35	2	3	2	19	1	1	2	1		1	2	0	3	3	0	0	0	0	0		1	0	0	0	0	0	0	0	0	0	0	0	0
2	2015-01-28 14:57:10	2015-01-28 18:03:39	2015-01-28	360000000000000	Eddah	Malambo	Vg5	29	3	5	1	20	1	4	1	1		3	1	2	6	3	0	0	0	0	0		1	0	0	0	0	0	0	0	0	0	0	0	0
2	2015-01-28 14:57:10	2015-01-28 18:46:05	2015-01-28	358000000000000	Dalitso	Malambo	Vg48	48	3	6	1	18	1	4	3	5		1	4	1	6	3	0	0	0	0	0		1	0	0	0	0	0	0	0	0	0	0	0	0
2	2015-01-28 15:02:27	2015-01-28 17:50:29	2015-01-28	356000000000000	Maureen	Malambo	Vg23	19	1	1	1	43	1	1	2	2		5	2	1	8	3	0	0	0	0	0		1	0	0	0	0	0	0	0	0	0	0	0	0
2	2015-01-28 15:04:21	2015-01-28 18:46:47	2015-01-28	359000000000000	Phonex	Malambo	Vg27	20	1	1	1	63	1	3	2	1		1	2	1	4	3	0	0	0	0	0		1	0	0	0	0	0	0	0	0	0	0	0	0
2	2015-01-28 15:08:54	2015-01-28 18:46:13	2015-01-28	358000000000000	Dalitso	Malambo	Vg48	48	1	1	1	42	1	1	3	4		1	4	1	6	3	0	0	0	0	0		1	0	0	0	0	0	0	0	0	0	0	0	0
2	2015-01-28 15:16:23	2015-01-28 18:46:22	2015-01-28	358000000000000	Dalitso	Malambo	Vg48	48	2	3	2	26	1	1	2	other	House hold chores	1	4	1	6	3	0	0	0	0	0		1	0	0	0	0	0	0	0	0	0	0	0	0
2	2015-01-28 15:23:29	2015-01-28 18:46:32	2015-01-28	358000000000000	Dalitso	Malambo	Vg48	48	4	5	2	21	1	2	3	2		1	4	1	6	3	0	0	0	0	0		1	0	0	0	0	0	0	0	0	0	0	0	0
2	2015-01-28 15:27:52	2015-01-28 18:47:24	2015-01-28	359000000000000	Phonex	Malambo	Vg27	16	1	1	1	26	1	1	2	1		4	2	0	6	3	0	0	0	0	0		1	0	0	0	0	0	0	0	0	0	0	0	0
2	2015-01-28 15:29:55	2015-01-28 18:57:04	2015-01-28	356000000000000	Halima	Malambo	Vg18	5	1	1	1	25	1	1	2	1		2	2	0	4	3	0	0	0	0	0		1	0	0	0	0	0	0	0	0	0	0	0	0
2	2015-01-28 15:42:56	2015-01-28 18:25:26	2015-01-28	359000000000000	Valens	Malambo	Vg28	17	2	3	2	71	1	1	2	1		0	0	2	2	3	0	1	1	0	0		1	0	1	0	0	0	0	0	0	1	1	1	0		media\1422452991300.jpg	media\1422453033176.jpg
2	2015-01-28 15:49:20	2015-01-28 17:51:26	2015-01-28	356000000000000	Maureen	Malambo	Vg23	18	2	3	2	42	1	1	2	2		1	0	2	3	3	0	0	0	0	0		1	0	0	0	0	1	0	0	0	0	0	1	0		media\1422453237152.jpg	media\1422453261767.jpg
2	2015-01-29 10:27:56	2015-01-29 17:19:44	2015-01-29	356000000000000	Halima	Malambo	Vg16	23	1	3	2	27	1	1	3	1		1	2	0	3	3	0	0	0	0	0		1	0	0	0	0	0	0	0	0	0	0	0	0
2	2015-01-29 10:44:08	2015-01-29 19:26:38	2015-01-29	359000000000000	Gausi	Malambo	Vg11	2	2	3	2	31	1	1	2	1		4	2	0	6	3	0	0	0	0	0		1	0	0	0	0	0	0	0	0	0	0	0	0
2	2015-01-29 10:54:52	2015-01-29 17:19:54	2015-01-29	356000000000000	Halima	Malambo	Vg16	23	2	1	1	27	1	1	2	1		1	2	0	3	3	0	0	0	0	0		1	0	0	0	0	0	0	0	0	0	0	0	0
2	2015-01-29 11:05:26	2015-01-29 19:27:05	2015-01-29	359000000000000	Gausi	Malambo	Vg11	1	1	1	1	36	1	1	2	1		3	3	0	6	3	0	0	0	0	0		1	0	0	0	0	0	0	0	0	0	0	0	0
2	2015-01-29 11:09:10	2015-01-29 19:27:16	2015-01-29	359000000000000	Gausi	Malambo	Vg11	1	2	3	2	33	1	1	2	1		3	3	0	6	3	0	0	0	0	0		1	0	0	0	0	0	0	0	0	0	0	0	0
2	2015-01-29 11:12:20	2015-01-29 19:27:31	2015-01-29	359000000000000	Gausi	Malambo	Vg11	1	3	5	2	15	1	1	2	5		0	3	3	6	3	0	0	0	0	0		1	0	0	0	0	0	0	0	0	0	0	0	0
2	2015-01-29 11:12:23	2015-01-29 17:41:36	2015-01-29	359000000000000	Valens	Malambo	Vg15	17	2	3	2	32	1	1	3	1		2	3	0	5	3	0	0	0	0	0		1	0	0	0	0	0	0	0	0	0	0	0	0
2	2015-01-29 11:25:25	2015-01-29 17:20:35	2015-01-29	356000000000000	Halima	Malambo	Vg16	25	1	3	2	48	1	1	3	1		0	2	2	4	3	0	0	0	0	0		1	0	0	0	0	0	0	0	0	0	0	0	0
2	2015-01-29 11:29:51	2015-01-29 17:20:46	2015-01-29	356000000000000	Halima	Malambo	Vg16	25	4	5	2	15	1	4	2	5		0	2	2	4	3	0	0	0	0	0		1	0	0	0	0	0	0	0	0	0	0	0	0
2	2015-01-29 11:30:58	2015-01-29 19:28:59	2015-01-29	359000000000000	Gausi	Malambo	Vg11	3	2	3	2	26	1	1	2	1		2	2	0	4	3	0	0	0	0	0		1	0	0	0	0	0	0	0	0	0	0	0	0
2	2015-01-29 11:32:30	2015-01-29 17:20:57	2015-01-29	356000000000000	Halima	Malambo	Vg16	25	3	5	1	22	1	4	3	1		0	2	2	4	3	0	0	0	0	0		1	0	0	0	0	0	0	0	0	0	0	0	0
2	2015-01-29 11:36:24	2015-01-29 18:05:11	2015-01-29	356000000000000	Maureen	Malambo	Vg25	5	2	3	2	20	1	1	2	1		3	2	0	5	3	0	0	0	0	0		1	0	0	0	0	0	0	0	0	0	0	0	0
2	2015-01-29 11:37:45	2015-01-29 19:05:16	2015-01-29	360000000000000	Eddah	Malambo	Vg45	19	4	5	1	20	1	4	3	1		1	3	2	6	3	0	0	0	0	0		1	0	0	0	0	0	0	0	0	0	0	0	0
2	2015-01-29 11:41:22	2015-01-29 19:05:27	2015-01-29	360000000000000	Eddah	Malambo	Vg45	19	5	5	1	16	1	4	3	5		1	3	2	6	3	0	0	0	0	0		1	0	0	0	0	0	0	0	0	0	0	0	0
2	2015-01-29 11:45:48	2015-01-29 19:05:37	2015-01-29	360000000000000	Eddah	Malambo	Vg45	19	3	5	2	27	1	4	3	1		1	3	2	6	3	0	0	0	0	0		1	0	0	0	0	0	0	0	0	0	0	0	0
2	2015-01-29 11:49:56	2015-01-29 17:31:47	2015-01-29	359000000000000	Phonex	Malambo	Vg13	4	1	1	1	27	1	1	3	2		1	2	0	3	3	0	0	0	0	0		1	0	0	0	0	0	0	0	0	0	0	0	0
2	2015-01-29 11:53:17	2015-01-29 18:05:49	2015-01-29	356000000000000	Maureen	Malambo	Vg25	6	4	5	2	22	1	4	2	1		2	5	2	9	3	0	0	0	0	0		1	0	0	0	0	0	0	0	0	0	0	0	0
2	2015-01-29 11:54:04	2015-01-29 18:33:46	2015-01-29	359000000000000	Collins	Malambo	Vg35	10	1	3	2	30	1	1	2	1		3	1	1	5	3	0	0	0	0	0		1	0	0	0	0	0	0	0	0	0	0	0	0
2	2015-01-29 11:56:20	2015-01-29 17:21:24	2015-01-29	356000000000000	Halima	Malambo	Vg16	10	1	3	2	46	1	1	2	1		3	0	2	5	3	0	0	0	0	0		1	0	0	0	0	0	0	0	0	0	0	0	0
2	2015-01-29 11:58:39	2015-01-29 18:53:51	2015-01-29	359000000000000	Alex	Malambo	Vg36	16	2	3	2	52	1	1	1	1		1	0	2	3	3	0	0	0	0	0		1	0	0	0	0	0	0	0	0	0	0	0	0
2	2015-01-29 12:00:35	2015-01-29 19:03:56	2015-01-29	358000000000000	Francis	Malambo	Vg38	25	1	1	1	36	1	1	3	1		5	2	0	7	3	0	0	0	0	0		1	0	0	0	0	0	0	0	0	0	0	0	0
2	2015-01-29 12:04:45	2015-01-29 18:51:37	2015-01-29	358000000000000	Dalitso	Malambo	Vg48	8	1	1	1	28	1	1	3	1		2	2	0	4	3	0	0	0	0	0		1	0	0	0	0	0	0	0	0	0	0	0	0
2	2015-01-29 12:05:03	2015-01-29 19:29:52	2015-01-29	359000000000000	Gausi	Malambo	Vg11	5	2	3	2	47	1	1	1	1		4	1	2	7	3	0	0	0	0	0		1	0	0	0	0	0	0	0	0	0	0	0	0
2	2015-01-29 12:05:35	2015-01-29 19:04:56	2015-01-29	358000000000000	Francis	Malambo	Vg38	25	2	3	2	35	1	1	2	1		5	2	0	7	3	0	0	0	0	0		1	0	0	0	0	0	0	0	0	0	0	0	0
2	2015-01-29 12:07:39	2015-01-29 19:08:00	2015-01-29	360000000000000	Eddah	Malambo	Vg45	20	1	1	1	39	1	1	2	1		4	2	0	6	3	0	0	0	0	0		1	0	0	0	0	0	0	0	0	0	0	0	0
2	2015-01-29 12:11:01	2015-01-29 19:08:13	2015-01-29	360000000000000	Eddah	Malambo	Vg45	20	2	3	2	30	1	1	3	1		4	2	0	6	3	0	0	0	0	0		1	0	0	0	0	0	0	0	0	0	0	0	0
2	2015-01-29 12:11:17	2015-01-29 18:35:16	2015-01-29	359000000000000	Collins	Malambo	Vg35	9	1	1	2	47	1	1	2	1		4	2	2	8	3	0	0	0	0	0		1	0	0	0	0	0	0	0	0	0	0	0	0
2	2015-01-29 12:11:26	2015-01-29 19:36:04	2015-01-29	359000000000000	Gausi	Malambo	Vg11	5	3	5	1	18	1	1	2	1		4	1	2	7	3	0	0	0	0	0		1	0	0	0	0	0	0	0	0	0	0	0	0
2	2015-01-29 12:13:51	2015-01-29 18:52:06	2015-01-29	358000000000000	Dalitso	Malambo	Vg48	8	2	3	2	26	1	1	3	2		2	2	0	4	3	0	0	0	0	0		1	0	0	0	0	0	0	0	0	0	0	0	0
2	2015-01-29 12:15:44	2015-01-29 18:06:11	2015-01-29	356000000000000	Maureen	Malambo	Vg25	6	1	1	1	50	1	1	1	1		2	5	2	9	3	0	0	0	0	0		1	0	0	0	0	0	0	0	0	0	0	0	0
2	2015-01-29 12:17:19	2015-01-29 17:22:12	2015-01-29	356000000000000	Halima	Malambo	Vg16	5	1	1	1	36	1	1	3	1		2	2	0	4	3	0	0	0	0	0		1	0	0	0	0	0	0	0	0	0	0	0	0
2	2015-01-29 12:21:32	2015-01-29 18:06:24	2015-01-29	356000000000000	Maureen	Malambo	Vg25	6	2	3	2	46	1	1	2	1		2	5	2	9	3	0	0	0	0	0		1	0	0	0	0	0	0	0	0	0	0	0	0
2	2015-01-29 12:25:46	2015-01-29 17:22:25	2015-01-29	356000000000000	Halima	Malambo	Vg16	5	2	3	2	34	1	1	3	1		2	2	0	4	3	0	0	0	0	0		1	0	0	0	0	0	0	0	0	0	0	0	0
2	2015-01-29 12:26:48	2015-01-29 19:06:23	2015-01-29	358000000000000	Francis	Malambo	Vg38	24	2	3	2	28	1	1	2	1		3	2	0	5	3	0	0	0	0	0		1	0	0	0	0	0	0	0	0	0	0	0	0
2	2015-01-29 12:31:29	2015-01-29 18:38:21	2015-01-29	359000000000000	Collins	Malambo	Vg35	11	2	3	2	32	1	1	2	1		4	2	0	6	3	0	0	1	0	0		1	0	0	0	0	0	0	0	0	0	0	0	0
2	2015-01-29 12:32:22	2015-01-29 18:55:05	2015-01-29	359000000000000	Alex	Malambo	Vg36	22	4	5	1	16	1	4	2	5		3	2	2	7	3	0	0	1	1	0		1	0	0	0	0	0	0	0	0	0	0	1	0		media\1422527747388.jpg
2	2015-01-29 12:36:47	2015-01-29 18:55:18	2015-01-29	359000000000000	Alex	Malambo	Vg36	22	2	3	2	43	1	1	2	1		3	2	2	7	3	0	0	0	0	0		1	0	0	0	0	0	0	0	0	0	0	0	0
2	2015-01-29 12:39:02	2015-01-29 18:39:16	2015-01-29	359000000000000	Collins	Malambo	Vg35	9	4	5	2	19	1	4	2	1		4	2	2	8	3	0	0	0	0	0		1	0	0	0	0	0	0	0	0	0	0	0	0
2	2015-01-29 12:40:46	2015-01-29 17:44:19	2015-01-29	359000000000000	Valens	Malambo	Vg15	20	1	3	2	27	1	1	1	1		1	2	0	3	3	0	0	1	0	0		1	0	0	0	0	0	0	0	0	0	0	0	0
2	2015-01-29 12:44:13	2015-01-29 19:14:55	2015-01-29	360000000000000	Kalua	MALAMBO	Vg1	30	3	3	2	38	1	1	2	1		4	2	1	7	3	0	0	0	0	0		1	0	0	0	0	0	0	0	0	0	0	0	0
2	2015-01-29 12:44:44	2015-01-29 17:22:50	2015-01-29	356000000000000	Halima	Malambo	Vg16	14	1	1	1	81	1	1	2	1		0	0	2	2	3	0	0	0	0	0		1	0	0	0	0	0	0	0	0	0	0	0	0
2	2015-01-29 12:46:16	2015-01-29 18:39:38	2015-01-29	359000000000000	Collins	Malambo	Vg35	9	5	5	2	16	1	4	2	5		3	3	2	8	3	0	0	0	0	0		1	0	0	0	0	0	0	0	0	0	0	0	0
2	2015-01-29 12:49:06	2015-01-29 22:04:32	2015-01-29	360000000000000	Patrick	Malambo	Vg4	19	2	3	2	27	1	1	2	1		4	2	0	6	3	0	0	0	0	0		1	0	0	0	0	0	0	0	0	0	0	0	0
2	2015-01-29 12:49:22	2015-01-29 19:15:14	2015-01-29	360000000000000	Kalua	MALAMBO	Vg1	32	1	1	1	45	1	1	2	1		5	3	1	9	3	0	0	0	0	0		1	0	0	0	0	0	0	0	0	0	0	0	0
2	2015-01-29 12:51:52	2015-01-29 19:07:35	2015-01-29	358000000000000	Francis	Malambo	Vg38	33	2	3	2	24	1	1	2	1		2	2	0	4	3	0	0	0	0	0		1	0	0	0	0	0	0	0	0	0	0	0	0
2	2015-01-29 12:52:28	2015-01-29 18:56:25	2015-01-29	359000000000000	Alex	Malambo	Vg36	24	1	1	2	29	1	2	2	1		2	1	0	3	3	0	0	0	0	0		1	0	0	0	0	0	0	0	0	0	0	0	0
2	2015-01-29 12:54:46	2015-01-29 19:08:53	2015-01-29	360000000000000	Eddah	Malambo	Vg45	23	1	1	1	82	1	1	2	1		0	1	2	3	3	0	0	0	0	0		1	0	0	0	0	0	0	0	0	0	0	0	0
2	2015-01-29 12:56:28	2015-01-29 17:45:22	2015-01-29	359000000000000	Valens	Malambo	Vg15	23	1	1	1	28	1	1	3	1		1	3	0	4	3	0	0	0	0	0		1	0	0	0	0	0	0	0	0	0	0	0	0
2	2015-01-29 12:58:10	2015-01-29 17:23:06	2015-01-29	356000000000000	Halima	Malambo	Vg16	14	2	3	2	67	1	1	2	1		0	0	2	2	3	0	0	0	0	0		1	0	0	0	0	0	0	0	0	0	0	0	0
2	2015-01-29 13:03:41	2015-01-29 17:45:43	2015-01-29	359000000000000	Valens	Malambo	Vg15	23	2	3	2	24	1	1	3	1		1	3	0	4	3	0	0	0	0	0		1	0	0	0	0	0	0	0	0	0	0	0	0
2	2015-01-29 13:07:32	2015-01-29 17:23:41	2015-01-29	356000000000000	Halima	Malambo	Vg16	15	2	6	2	30	1	1	3	1		3	4	1	8	3	0	0	0	0	0		1	0	0	0	0	0	0	0	0	0	0	0	0
2	2015-01-29 13:10:06	2015-01-29 18:52:48	2015-01-29	358000000000000	Dalitso	Malambo	Vg43	23	1	1	1	30	1	1	2	1		4	2	0	6	3	0	0	0	0	0		1	0	0	0	0	0	0	0	0	0	0	0	0
2	2015-01-29 13:12:15	2015-01-29 19:08:07	2015-01-29	358000000000000	Francis	Malambo	Vg38	19	1	1	1	52	1	1	2	1		2	3	2	7	3	0	0	0	0	0		1	0	0	0	0	0	0	0	0	0	0	1	0		media\1422530302803.jpg
2	2015-01-29 13:13:29	2015-01-29 19:39:03	2015-01-29	359000000000000	Gausi	Malambo	Vg11	17	2	3	2	36	1	1	1	1		4	2	1	7	3	0	0	0	0	0		1	0	0	0	0	0	0	0	0	0	0	0	0
2	2015-01-29 13:15:56	2015-01-29 17:32:55	2015-01-29	359000000000000	Phonex	Malambo	Vg13	31	2	3	2	21	1	1	3	2		2	2	0	4	3	0	0	0	0	0		1	0	0	0	0	0	0	0	0	0	0	0	0
2	2015-01-29 13:16:21	2015-01-29 19:09:51	2015-01-29	360000000000000	Eddah	Malambo	Vg45	23	3	6	2	17	1	4	2	5		0	1	2	3	3	0	0	0	0	0		1	0	0	0	0	0	0	0	0	0	0	0	0
2	2015-01-29 13:16:33	2015-01-29 18:53:55	2015-01-29	358000000000000	Dalitso	Malambo	Vg43	23	2	3	2	26	1	1	1	1		4	2	0	6	3	0	0	0	0	0		1	0	0	0	0	0	0	0	0	0	0	0	0
2	2015-01-29 13:18:50	2015-01-29 19:08:20	2015-01-29	358000000000000	Francis	Malambo	Vg38	19	2	3	2	50	1	1	2	1		2	3	2	7	3	0	0	0	0	0		1	0	0	0	0	0	0	0	0	0	0	0	0
2	2015-01-29 13:20:13	2015-01-29 21:53:57	2015-01-29	360000000000000	Saukila	Malambo	Vg47	26	1	1	1	75	1	1	2	1		0	0	2	2	3	0	0	0	0	0		1	0	0	0	0	0	0	0	0	0	0	0	0
2	2015-01-29 13:21:56	2015-01-29 18:42:20	2015-01-29	359000000000000	Collins	Malambo	Vg35	18	6	1	1	53	1	1	2	1		2	3	2	7	3	0	0	0	0	0		1	0	0	0	0	0	0	0	0	0	0	0	0
2	2015-01-29 13:23:37	2015-01-29 17:23:56	2015-01-29	356000000000000	Halima	Malambo	Vg16	15	1	1	2	50	1	2	2	1		3	4	1	8	3	0	0	0	0	0		1	0	0	0	0	0	0	0	0	0	0	0	0
2	2015-01-29 13:23:51	2015-01-29 21:54:09	2015-01-29	360000000000000	Saukila	Malambo	Vg47	26	2	3	2	73	1	1	2	1		0	0	2	2	3	0	0	0	0	0		1	0	0	0	0	0	0	0	0	0	0	0	0
2	2015-01-29 13:26:31	2015-01-29 17:46:33	2015-01-29	359000000000000	Valens	Malambo	Vg15	25	1	1	1	22	1	1	3	2		0	2	0	2	3	0	0	0	0	0		1	0	0	0	0	0	0	0	0	0	0	0	0
2	2015-01-29 13:29:13	2015-01-29 19:18:58	2015-01-29	360000000000000	Kalua	MALAMBO	Vg1	12	2	5	1	26	1	4	3	1		0	2	1	3	3	0	0	0	0	0		1	0	0	0	0	0	0	0	0	0	0	0	0
2	2015-01-29 13:31:54	2015-01-29 19:08:40	2015-01-29	358000000000000	Francis	Malambo	Vg38	8	1	1	1	30	1	1	2	1		3	2	0	5	3	0	0	0	0	0		1	0	0	0	0	0	0	0	0	0	0	0	0
2	2015-01-29 13:34:49	2015-01-29 17:33:16	2015-01-29	359000000000000	Phonex	Malambo	Vg13	36	2	1	2	58	1	1	2	1		1	2	2	5	3	0	1	1	1	0		1	0	1	0	0	0	0	0	0	1	0	1	0		media\1422532108030.jpg
2	2015-01-29 13:34:58	2015-01-29 22:06:30	2015-01-29	360000000000000	Patrick	Malambo	Vg4	9	1	1	1	31	1	1	2	1		3	2	1	6	3	0	1	1	0	0		1	0	0	0	0	0	0	0	0	0	0	1	0		media\1422531635043.jpg
2	2015-01-29 13:37:56	2015-01-29 19:39:46	2015-01-29	359000000000000	Gausi	Malambo	Vg11	18	1	1	1	28	1	1	1	1		3	2	0	5	3	0	0	0	0	0		1	0	0	0	0	0	0	0	0	0	0	0	0
2	2015-01-29 13:38:56	2015-01-29 19:08:53	2015-01-29	358000000000000	Francis	Malambo	Vg38	8	2	3	2	25	1	1	2	1		3	2	0	5	3	0	0	0	0	0		1	0	0	0	0	0	0	0	0	0	0	0	0
2	2015-01-29 13:39:18	2015-01-29 18:43:18	2015-01-29	359000000000000	Collins	Malambo	Vg35	23	1	3	2	28	1	1	2	1		2	3	1	6	3	0	0	0	0	0		1	0	0	0	0	0	0	0	0	0	0	0	0
2	2015-01-29 13:41:16	2015-01-29 19:40:01	2015-01-29	359000000000000	Gausi	Malambo	Vg11	18	2	3	2	25	1	1	1	1		3	2	0	5	3	0	0	0	0	0		1	0	0	0	0	0	0	0	0	0	0	0	0
2	2015-01-29 13:41:51	2015-01-29 18:44:39	2015-01-29	359000000000000	Collins	Malambo	Vg35	23	5	6	2	24	1	4	1	1		2	3	1	6	3	0	0	0	0	0		1	0	0	0	0	0	0	0	0	0	0	0	0
2	2015-01-29 13:43:33	2015-01-29 22:06:43	2015-01-29	360000000000000	Patrick	Malambo	Vg4	9	2	3	2	27	1	1	2	1		3	2	1	6	3	0	0	0	0	0		1	0	0	0	0	0	0	0	0	0	0	0	0
2	2015-01-29 13:45:07	2015-01-29 17:26:12	2015-01-29	356000000000000	Halima	Malambo	Vg16	18	1	1	1	69	1	1	1	1		1	1	2	4	3	0	0	0	0	0		1	0	0	0	0	0	0	0	0	0	0	0	0
2	2015-01-29 13:45:21	2015-01-29 17:46:46	2015-01-29	359000000000000	Valens	Malambo	Vg15	25	2	3	2	18	1	1	3	1		0	2	0	2	3	0	0	0	0	0		1	0	0	0	0	0	0	0	0	0	0	0	0
2	2015-01-29 13:46:01	2015-01-29 18:47:53	2015-01-29	359000000000000	Collins	Malambo	Vg35	23	6	6	1	22	1	4	1	1		2	3	1	6	3	0	0	0	0	0		1	0	0	0	0	0	0	0	0	0	0	0	0
2	2015-01-29 13:49:06	2015-01-29 18:58:30	2015-01-29	359000000000000	Alex	Malambo	Vg36	32	1	3	2	33	1	1	1	1		5	2	0	7	3	0	0	0	0	0		1	0	0	0	0	0	0	0	0	0	0	0	0
2	2015-01-29 13:49:11	2015-01-29 18:48:41	2015-01-29	359000000000000	Collins	Malambo	Vg35	23	2	1	1	51	1	1	2	1		2	3	1	6	3	0	0	0	0	0		1	0	0	0	0	0	0	0	0	0	0	0	0
2	2015-01-29 13:50:48	2015-01-29 17:26:23	2015-01-29	356000000000000	Halima	Malambo	Vg16	18	2	3	2	56	1	1	3	1		1	1	2	4	3	0	0	0	0	0		1	0	0	0	0	0	0	0	0	0	0	0	0
2	2015-01-29 13:53:57	2015-01-29 19:11:16	2015-01-29	360000000000000	Eddah	Malambo	Vg45	26	2	3	2	44	1	1	1	1		3	1	2	6	3	0	0	0	0	0		1	0	0	0	0	0	0	0	0	0	0	0	0
2	2015-01-29 14:00:08	2015-01-29 17:47:12	2015-01-29	359000000000000	Valens	Malambo	Vg15	24	1	1	1	35	1	1	3	2		1	2	0	3	3	0	0	0	0	0		1	0	0	0	0	0	0	0	0	0	0	0	0
2	2015-01-29 14:03:37	2015-01-29 19:11:37	2015-01-29	360000000000000	Eddah	Malambo	Vg45	26	3	5	2	19	1	1	2	1		3	1	2	6	3	0	0	0	0	0		1	0	0	0	0	0	0	0	0	0	0	0	0
2	2015-01-29 14:05:16	2015-01-29 17:27:19	2015-01-29	356000000000000	Halima	Malambo	Vg16	24	1	3	2	26	1	1	3	1		1	2	0	3	3	0	0	0	0	0		1	0	0	0	0	0	0	0	0	0	0	0	0
2	2015-01-29 14:07:34	2015-01-29 19:09:25	2015-01-29	358000000000000	Francis	Malambo	Vg38	12	2	3	2	38	1	1	2	1		1	2	2	5	3	0	0	0	0	0		1	0	0	0	0	0	0	0	0	0	0	0	0
2	2015-01-29 14:07:45	2015-01-29 17:33:29	2015-01-29	359000000000000	Phonex	Malambo	Vg13	36	3	5	2	23	1	4	3	1		1	2	2	5	3	0	0	0	0	0		1	0	0	0	0	0	0	0	0	0	0	0	0
2	2015-01-29 14:08:28	2015-01-29 19:24:52	2015-01-29	360000000000000	Kalua	MALAMBO	Vg1	2	2	3	2	26	1	1	2	1		3	2	0	5	3	0	0	0	0	0		1	0	0	0	0	0	0	0	0	0	0	0	0
2	2015-01-29 14:08:34	2015-01-29 18:56:31	2015-01-29	358000000000000	Dalitso	Malambo	Vg43	32	1	1	2	71	1	3	2	1		3	3	1	7	3	0	0	0	0	0		1	0	0	0	0	0	0	0	0	0	0	0	0
2	2015-01-29 14:10:16	2015-01-29 18:49:35	2015-01-29	359000000000000	Collins	Malambo	Vg35	25	1	1	2	35	1	1	2	1		5	2	0	7	3	0	0	1	0	0		1	0	0	0	0	0	0	0	0	0	0	0	0
2	2015-01-29 14:13:41	2015-01-29 18:59:47	2015-01-29	359000000000000	Alex	Malambo	Vg36	12	1	3	2	31	1	1	2	1		2	3	0	5	3	0	0	0	0	0		1	0	0	0	0	0	0	0	0	0	0	0	0
2	2015-01-29 14:15:12	2015-01-29 18:56:45	2015-01-29	358000000000000	Dalitso	Malambo	Vg43	32	2	5	1	29	1	4	3	1		3	3	1	7	3	0	0	0	0	0		1	0	0	0	0	0	0	0	0	0	0	0	0
2	2015-01-29 14:19:19	2015-01-29 17:27:34	2015-01-29	356000000000000	Halima	Malambo	Vg16	24	2	1	1	29	1	1	3	1		1	2	0	3	3	0	0	0	0	0		1	0	0	0	0	0	0	0	0	0	0	0	0
2	2015-01-29 14:19:25	2015-01-29 19:10:08	2015-01-29	358000000000000	Francis	Malambo	Vg38	12	3	5	2	15	1	4	2	1		1	2	2	5	3	0	0	0	0	0		1	0	0	0	0	0	0	0	0	0	0	0	0
2	2015-01-29 14:20:17	2015-01-29 18:56:58	2015-01-29	358000000000000	Dalitso	Malambo	Vg43	32	3	5	2	26	1	1	2	1		3	3	1	7	3	0	0	0	0	0		1	0	0	0	0	0	0	0	0	0	0	0	0
2	2015-01-29 14:22:08	2015-01-29 17:47:38	2015-01-29	359000000000000	Valens	Malambo	Vg15	29	1	1	1	32	1	1	2	2		4	3	0	7	3	0	0	0	0	0		1	0	0	0	0	0	0	0	0	0	0	0	0
2	2015-01-29 14:22:54	2015-01-29 17:33:56	2015-01-29	359000000000000	Phonex	Malambo	Vg13	5	2	3	2	25	1	1	3	4		2	2	0	4	3	0	1	1	0	0		1	0	1	0	0	0	0	0	0	1	0	1	0		media\1422534572636.jpg
2	2015-01-29 14:22:54	2015-01-29 19:25:12	2015-01-29	360000000000000	Kalua	MALAMBO	Vg1	6	1	1	1	29	1	1	2	1		3	2	0	5	3	0	0	0	0	0		1	0	0	0	0	0	0	0	0	0	0	0	0
2	2015-01-29 14:27:28	2015-01-29 19:40:24	2015-01-29	359000000000000	Gausi	Malambo	Vg11	6	1	1	1	38	1	1	2	1		3	2	0	5	3	0	0	0	0	0		1	0	0	0	0	0	0	0	0	0	0	1	0		media\1422534659786.jpg
2	2015-01-29 14:30:41	2015-01-29 19:11:55	2015-01-29	360000000000000	Eddah	Malambo	Vg45	8	1	1	1	46	1	1	1	1		7	2	1	10	3	0	0	0	0	0		1	0	0	0	0	0	0	0	0	0	0	0	0
2	2015-01-29 14:32:20	2015-01-29 19:40:46	2015-01-29	359000000000000	Gausi	Malambo	Vg11	6	2	3	2	35	1	1	2	1		3	2	0	5	3	0	0	0	0	0		1	0	0	0	0	0	0	0	0	0	0	0	0
2	2015-01-29 14:33:37	2015-01-29 22:08:08	2015-01-29	360000000000000	Patrick	Malambo	Vg4	13	3	5	2	55	1	3	2	1		0	1	3	4	3	0	0	1	1	0		1	0	0	0	0	0	0	0	0	0	0	1	0		media\1422535115346.jpg
2	2015-01-29 14:35:11	2015-01-29 18:09:47	2015-01-29	356000000000000	Maureen	Malambo	Vg25	15	3	5	2	23	1	2	2	1		3	2	2	7	3	0	0	0	0	0		1	0	0	0	0	0	0	0	0	0	0	0	0
2	2015-01-29 14:36:01	2015-01-29 19:10:28	2015-01-29	358000000000000	Francis	Malambo	Vg38	15	1	3	2	41	1	1	2	1		2	1	2	5	3	0	0	0	0	0		1	0	0	0	0	0	0	0	0	0	0	0	0
2	2015-01-29 14:40:57	2015-01-29 19:10:42	2015-01-29	358000000000000	Francis	Malambo	Vg38	15	5	5	1	17	1	4	2	1		2	1	2	5	3	0	0	0	0	0		1	0	0	0	0	0	0	0	0	0	0	0	0
2	2015-01-29 14:42:01	2015-01-29 19:00:00	2015-01-29	359000000000000	Alex	Malambo	Vg36	12	3	5	1	16	1	4	2	5		2	3	0	5	3	0	0	0	0	0		1	0	0	0	0	0	0	0	0	0	0	0	0
2	2015-01-29 14:44:47	2015-01-29 19:12:10	2015-01-29	360000000000000	Eddah	Malambo	Vg45	8	2	3	2	38	1	1	1	1		7	2	1	10	3	0	0	1	0	0		1	0	0	0	0	0	0	0	0	0	0	0	0
2	2015-01-29 14:48:28	2015-01-29 18:50:07	2015-01-29	359000000000000	Collins	Malambo	Vg35	16	1	1	2	65	1	2	1	1		1	1	1	3	3	0	0	0	0	0		1	0	0	0	0	0	0	0	0	0	0	0	0
2	2015-01-29 14:49:56	2015-01-29 19:12:24	2015-01-29	360000000000000	Eddah	Malambo	Vg45	8	3	5	2	16	1	4	1	1		7	2	1	10	3	0	0	0	0	0		1	0	0	0	0	0	0	0	0	0	0	0	0
2	2015-01-29 14:53:01	2015-01-29 17:48:14	2015-01-29	359000000000000	Valens	Malambo	Vg15	29	2	3	2	26	1	1	2	1		4	3	0	7	3	0	0	0	0	0		1	0	0	0	0	0	0	0	0	0	0	0	0
2	2015-01-29 14:53:04	2015-01-29 18:58:19	2015-01-29	358000000000000	Dalitso	Malambo	Vg43	3	1	1	1	38	1	1	2	1		1	2	0	3	3	0	0	0	0	0		1	0	0	0	0	0	0	0	0	0	0	0	0
2	2015-01-29 15:03:11	2015-01-29 22:09:12	2015-01-29	360000000000000	Patrick	Malambo	Vg4	2	1	1	1	27	1	1	1	1		2	2	0	4	3	0	1	1	1	0		1	0	0	0	0	0	0	0	0	0	0	0	0
2	2015-01-29 15:04:59	2015-01-29 18:10:19	2015-01-29	356000000000000	Maureen	Malambo	Vg25	20	2	3	2	40	1	1	2	1		4	2	2	8	3	0	0	0	0	0		1	0	0	0	0	0	0	0	0	0	0	0	0
2	2015-01-29 15:05:03	2015-01-29 19:12:37	2015-01-29	360000000000000	Eddah	Malambo	Vg45	10	2	3	2	19	1	1	2	1		1	2	0	3	3	0	0	0	0	0		1	0	0	0	0	0	0	0	0	0	0	0	0
2	2015-01-29 15:05:51	2015-01-29 19:41:26	2015-01-29	359000000000000	Gausi	Malambo	Vg11	13	1	1	1	58	1	1	2	1		2	0	1	3	3	0	0	0	0	0		1	0	0	0	0	0	0	0	0	0	0	0	0
2	2015-01-29 15:08:34	2015-01-29 18:50:48	2015-01-29	359000000000000	Collins	Malambo	Vg35	37	1	1	1	22	1	1	2	1		1	2	0	3	3	0	0	0	0	0		1	0	0	0	0	0	0	0	0	0	0	0	0
2	2015-01-29 15:08:58	2015-01-29 19:13:02	2015-01-29	360000000000000	Eddah	Malambo	Vg45	10	1	1	1	26	1	1	2	1		1	2	0	3	3	0	0	0	0	0		1	0	0	0	0	0	0	0	0	0	0	0	0
2	2015-01-29 15:09:02	2015-01-29 18:10:36	2015-01-29	356000000000000	Maureen	Malambo	Vg25	20	3	5	1	19	1	4	2	1		4	2	2	8	3	0	0	0	0	0		1	0	0	0	0	0	0	0	0	0	0	0	0
2	2015-01-29 15:11:12	2015-01-29 18:10:51	2015-01-29	356000000000000	Maureen	Malambo	Vg25	20	4	5	1	17	1	4	2	4		4	2	2	8	3	0	0	0	0	0		1	0	0	0	0	0	0	0	0	0	0	0	0
2	2015-01-29 15:11:47	2015-01-30 16:01:13	2015-01-29	359000000000000	Collins	Malambo	Vg35	37	2	3	2	20	1	1	3	1		1	2	0	3	3	0	0	0	0	0		1	0	0	0	0	0	0	0	0	0	0	0	0
2	2015-01-29 15:19:20	2015-01-29 18:11:13	2015-01-29	356000000000000	Maureen	Malambo	Vg25	8	1	1	1	28	1	1	1	1		3	2	0	5	3	0	0	0	0	0		1	0	0	0	0	0	0	0	0	0	0	0	0
2	2015-01-29 15:26:31	2015-01-29 19:12:01	2015-01-29	358000000000000	Francis	Malambo	Vg38	19	4	5	1	22	1	4	3	5		2	3	2	7	3	0	0	0	0	0		1	0	0	0	0	0	0	0	0	0	0	0	0
2	2015-01-29 15:27:56	2015-01-29 18:11:26	2015-01-29	356000000000000	Maureen	Malambo	Vg25	8	2	3	2	24	1	1	2	1		3	2	0	5	3	0	0	0	0	0		1	0	0	0	0	0	0	0	0	0	0	0	0
2	2015-01-29 15:30:39	2015-01-29 19:12:12	2015-01-29	358000000000000	Francis	Malambo	Vg38	19	3	5	2	25	1	4	3	5		2	3	2	7	3	0	0	0	0	0		1	0	0	0	0	1	0	0	0	0	0	1	0		media\1422538594887.jpg
2	2015-01-29 15:41:32	2015-01-29 17:35:37	2015-01-29	359000000000000	Phonex	Malambo	Vg13	2	1	1	1	39	1	1	2	1		3	3	0	6	3	0	0	0	0	0		1	0	0	0	0	0	0	0	0	0	0	0	0
2	2015-01-29 15:43:59	2015-01-29 17:35:53	2015-01-29	359000000000000	Phonex	Malambo	Vg13	2	2	3	2	39	1	1	3	1		3	3	0	6	3	0	0	0	0	0		1	0	0	0	0	0	0	0	0	0	0	0	0
2	2015-01-29 15:44:13	2015-01-29 22:10:15	2015-01-29	360000000000000	Patrick	Malambo	Vg4	5	2	3	2	51	1	1	2	1		3	1	2	6	3	0	0	1	0	0		1	0	0	0	0	0	0	0	0	0	0	0	0
2	2015-01-29 15:51:43	2015-01-29 22:10:31	2015-01-29	360000000000000	Patrick	Malambo	Vg4	5	3	5	2	17	1	4	2	1		3	1	2	6	3	0	0	0	0	0		1	0	0	0	0	0	0	0	0	0	0	0	0
2	2015-01-29 16:04:22	2015-01-29 19:00:16	2015-01-29	358000000000000	Dalitso	Malambo	Vg43	26	1	1	1	60	1	1	2	1		0	2	2	4	3	0	0	0	0	0		1	0	0	0	0	0	0	0	0	0	0	0	0
2	2015-01-29 16:17:55	2015-01-29 19:00:41	2015-01-29	358000000000000	Dalitso	Malambo	Vg43	26	2	3	2	50	1	1	2	1		0	2	2	4	3	0	0	0	0	0		1	0	0	0	0	0	0	0	0	0	0	0	0
2	2015-01-29 16:22:49	2015-01-29 22:11:38	2015-01-29	360000000000000	Patrick	Malambo	Vg4	17	4	5	2	18	1	4	2	1		5	2	2	9	3	0	0	0	0	0		1	0	0	0	0	0	0	0	0	0	0	0	0
2	2015-01-29 16:25:05	2015-01-29 19:02:05	2015-01-29	358000000000000	Dalitso	Malambo	Vg43	26	4	5	1	19	1	4	2	5		0	2	2	4	3	0	0	0	0	0		1	0	0	0	0	0	0	0	0	0	0	0	0
2	2015-01-29 16:33:55	2015-01-29 22:11:58	2015-01-29	360000000000000	Patrick	Malambo	Vg4	16	1	1	1	35	1	1	2	1		5	2	0	7	3	0	0	0	0	0		1	0	0	0	0	0	0	0	0	0	0	0	0
2	2015-01-29 16:38:34	2015-01-29 22:12:21	2015-01-29	360000000000000	Patrick	Malambo	Vg4	16	2	3	2	28	1	1	1	1		5	2	0	7	3	0	0	0	0	0		1	0	0	0	0	0	0	0	0	0	0	0	0
2	2015-01-30 10:50:11	2015-01-30 16:27:19	2015-01-30	359000000000000	Valens	Malambo	Vg15	4	1	1	1	31	1	1	3	4		3	3	0	6	3	0	0	0	0	0		1	0	0	0	0	0	0	0	0	0	0	0	0
2	2015-01-30 10:58:48	2015-01-30 16:27:36	2015-01-30	359000000000000	Valens	Malambo	Vg15	4	2	3	2	30	1	1	3	1		3	3	0	6	3	0	0	1	0	0		1	0	0	0	0	0	0	0	0	0	0	0	0
2	2015-01-30 11:05:36	2015-01-30 15:47:22	2015-01-30	356000000000000	Halima	Malambo	Vg32	1	1	1	1	27	1	1	4	4		2	2	1	5	3	0	0	0	0	0		1	0	0	0	0	0	0	0	0	0	0	0	0
2	2015-01-30 11:38:21	2015-01-30 16:28:55	2015-01-30	359000000000000	Valens	Malambo	Vg15	6	2	3	2	39	1	1	2	1		4	2	1	7	3	0	1	1	1	0		1	0	0	0	0	0	0	0	0	0	0	0	0
2	2015-01-30 11:43:08	2015-01-30 15:47:44	2015-01-30	356000000000000	Halima	Malambo	Vg32	1	2	3	2	25	1	1	3	1		2	2	1	5	3	0	0	0	0	0		1	0	0	0	0	0	0	0	0	0	0	0	0
2	2015-01-30 11:47:03	2015-01-30 15:48:03	2015-01-30	356000000000000	Halima	Malambo	Vg32	1	3	6	2	83	1	3	2	other	She doesnt work as she is attacked by diabetes and BP since 2011	2	2	1	5	3	0	0	1	0	0		1	0	0	0	0	0	0	0	0	0	0	0	0
2	2015-01-30 11:49:10	2015-01-30 16:29:14	2015-01-30	359000000000000	Valens	Malambo	Vg15	6	3	5	2	18	1	4	3	5		4	2	1	7	3	0	0	0	0	0		1	0	0	0	0	0	0	0	0	0	0	0	0
2	2015-01-30 11:55:57	2015-01-30 15:09:45	2015-01-30	356000000000000	Maureen	Malambo	Vg25	3	1	1	1	58	1	1	2	1		0	1	2	3	3	0	0	0	0	0		1	0	0	0	0	0	0	0	0	0	0	0	0
2	2015-01-30 12:21:17	2015-01-30 15:49:02	2015-01-30	356000000000000	Halima	Malambo	Vg32	3	1	1	1	36	1	1	3	1		4	2	0	6	3	0	0	0	0	0		1	0	0	0	0	0	0	0	0	0	0	0	0
2	2015-01-30 12:30:08	2015-01-30 19:42:45	2015-01-30	360000000000000	Eddah	Malambo	Vg45	1	1	1	1	37	1	1	3	1		4	2	0	6	3	0	0	0	0	0		1	0	0	0	0	0	0	0	0	0	0	0	0
2	2015-01-30 12:37:53	2015-01-30 19:43:02	2015-01-30	360000000000000	Eddah	Malambo	Vg45	1	2	3	2	34	1	1	2	1		4	2	0	6	3	0	0	0	0	0		1	0	0	0	0	0	0	0	0	0	0	0	0
2	2015-01-30 12:39:14	2015-01-30 15:49:22	2015-01-30	356000000000000	Halima	Malambo	Vg32	3	2	3	2	35	1	1	2	1		4	2	0	6	3	0	0	0	0	0		1	0	0	0	0	0	0	0	0	0	0	0	0
2	2015-01-30 12:55:17	2015-01-30 16:34:42	2015-01-30	359000000000000	Phonex	Malambo	Vg13	22	2	3	2	43	1	1	2	4		1	4	2	7	3	0	0	0	0	0		1	0	0	0	0	1	0	0	0	0	0	1	0		media\1422616183619.jpg
2	2015-01-30 12:56:36	2015-01-30 19:43:15	2015-01-30	360000000000000	Eddah	Malambo	Vg45	2	1	1	1	34	1	1	2	1		2	2	0	4	3	0	0	0	0	0		1	0	0	0	0	0	0	0	0	0	0	0	0
2	2015-01-30 12:58:03	2015-01-30 15:50:25	2015-01-30	356000000000000	Halima	Malambo	Vg32	19	1	1	1	51	1	1	2	1		1	1	2	4	3	0	0	0	0	0		1	0	0	0	0	0	0	0	0	0	0	0	0
2	2015-01-30 13:01:25	2015-01-30 19:43:39	2015-01-30	360000000000000	Eddah	Malambo	Vg45	2	2	3	2	29	1	1	2	1		2	2	0	4	3	0	0	0	0	0		1	0	0	0	0	0	0	0	0	0	0	0	0
2	2015-01-30 13:03:14	2015-01-30 16:35:01	2015-01-30	359000000000000	Phonex	Malambo	Vg13	22	4	5	1	21	1	4	3	5		1	4	2	7	3	0	0	0	0	0		1	0	0	0	0	0	0	0	0	0	0	0	0
2	2015-01-30 13:13:40	2015-01-30 15:10:52	2015-01-30	356000000000000	Maureen	Malambo	Vg32	14	2	3	2	54	1	1	1	1		5	1	3	9	3	0	0	0	0	0		1	0	0	0	0	0	0	0	0	0	0	0	0
2	2015-01-30 13:20:32	2015-01-30 16:35:16	2015-01-30	359000000000000	Phonex	Malambo	Vg13	22	5	5	2	15	1	4	2	5		1	4	2	7	3	0	0	0	0	0		1	0	0	0	0	0	0	0	0	0	0	0	0
2	2015-01-30 13:36:38	2015-01-30 15:11:35	2015-01-30	356000000000000	Maureen	Malambo	Vg32	30	1	1	1	19	1	1	2	1		1	2	0	3	3	0	0	0	0	0		1	0	0	0	0	0	0	0	0	0	0	0	0
2	2015-01-30 13:37:27	2015-01-30 16:36:40	2015-01-30	359000000000000	Phonex	Malambo	Vg13	18	5	5	2	19	1	4	2	2		2	5	0	7	3	0	0	0	0	0		1	0	0	0	0	0	0	0	0	0	0	0	0
2	2015-01-30 13:43:24	2015-01-30 15:11:49	2015-01-30	356000000000000	Maureen	Malambo	Vg32	30	2	3	2	18	1	1	2	1		1	2	0	3	3	0	0	0	0	0		1	0	0	0	0	0	0	0	0	0	0	0	0
2	2015-01-30 13:43:27	2015-01-30 16:37:07	2015-01-30	359000000000000	Phonex	Malambo	Vg13	18	4	5	1	15	1	4	3	5		2	5	0	7	3	0	0	0	0	0		1	0	0	0	0	0	0	0	0	0	0	0	0
2	2015-01-30 13:44:59	2015-01-30 16:03:26	2015-01-30	359000000000000	Alex	Malambo	Vg31	7	1	1	1	42	1	1	2	1		3	3	1	7	3	0	0	0	0	0		1	0	0	0	0	0	0	0	0	0	0	0	0
2	2015-01-30 13:48:55	2015-01-30 15:52:14	2015-01-30	356000000000000	Halima	Malambo	Vg32	24	2	3	2	28	1	1	1	1		3	2	0	5	3	0	0	0	0	0		1	0	0	0	0	0	0	0	0	0	0	0	0
2	2015-01-30 13:49:35	2015-01-30 19:40:51	2015-01-30	360000000000000	Kalua	MALAMBO	Vg42	39	1	1	1	25	1	1	2	1		2	2	0	4	3	0	0	0	0	0		1	0	0	0	0	0	0	0	0	0	0	0	0
2	2015-01-30 13:50:42	2015-01-30 19:13:31	2015-01-30	358000000000000	Dalitso	Malambo	Vg43	33	2	3	2	51	1	1	2	1		6	1	2	9	3	0	0	0	0	0		1	0	0	0	0	0	0	0	0	0	0	0	0
2	2015-01-30 13:52:09	2015-01-30 16:08:08	2015-01-30	358000000000000	Francis	Malambo	Vg31	19	2	3	2	27	1	1	2	1		2	2	0	4	3	0	0	0	0	0		1	0	0	0	0	0	0	0	0	0	0	0	0
2	2015-01-30 13:54:14	2015-01-30 16:00:47	2015-01-30	359000000000000	Collins	Malambo	Vg31	25	3	5	1	25	1	4	3	1		1	4	2	7	3	0	0	1	1	0		1	0	0	0	0	0	0	0	0	0	0	0	0
2	2015-01-30 13:55:52	2015-01-30 19:41:09	2015-01-30	360000000000000	Kalua	MALAMBO	Vg42	39	2	3	2	20	1	1	2	1		2	2	0	4	3	0	0	0	0	0		1	0	0	0	0	0	0	0	0	0	0	0	0
2	2015-01-30 13:55:53	2015-01-30 16:30:12	2015-01-30	359000000000000	Valens	Malambo	Vg28	7	1	1	2	80	1	3	2	1		2	0	1	3	3	0	0	0	0	0		1	0	0	0	0	0	0	0	0	0	0	0	0
2	2015-01-30 13:57:22	2015-01-30 19:27:48	2015-01-30	360000000000000	Patrick	Malambo	Vg41	36	1	1	1	34	1	1	1	1		4	2	0	6	3	0	0	0	0	0		1	0	0	0	0	0	0	0	0	0	0	0	0
2	2015-01-30 13:57:37	2015-01-30 16:04:07	2015-01-30	359000000000000	Alex	Malambo	Vg31	7	2	5	1	18	1	4	2	1		3	3	1	7	3	0	0	0	0	0		1	0	0	0	0	0	0	0	0	0	0	0	0
2	2015-01-30 13:58:10	2015-01-30 16:00:36	2015-01-30	359000000000000	Collins	Malambo	Vg31	25	6	5	1	16	1	4	2	1		1	4	2	7	3	0	0	1	1	0		1	0	0	0	0	0	0	0	0	0	0	0	0
2	2015-01-30 13:58:18	2015-01-30 15:52:34	2015-01-30	356000000000000	Halima	Malambo	Vg32	18	1	1	2	44	1	2	2	1		3	1	1	5	3	0	1	1	0	1	Chest pain	1	0	0	0	0	0	0	0	0	0	0	0	0
2	2015-01-30 14:01:19	2015-01-30 16:04:32	2015-01-30	359000000000000	Alex	Malambo	Vg31	7	3	5	1	16	1	4	2	5		3	3	1	7	3	0	0	0	0	0		1	0	0	0	0	0	0	0	0	0	0	0	0
2	2015-01-30 14:01:53	2015-01-30 16:00:16	2015-01-30	359000000000000	Collins	Malambo	Vg31	25	4	5	1	25	1	4	3	1		1	4	2	7	3	0	0	0	0	0		1	0	0	0	0	0	0	0	0	0	0	0	0
2	2015-01-30 14:04:19	2015-01-30 16:05:09	2015-01-30	359000000000000	Alex	Malambo	Vg31	7	7	3	2	34	1	1	2	1		3	3	1	7	3	0	0	0	0	0		1	0	0	0	0	0	0	0	0	0	0	0	0
2	2015-01-30 14:04:38	2015-01-30 16:08:32	2015-01-30	358000000000000	Francis	Malambo	Vg31	16	1	3	2	27	1	1	2	1		3	2	0	5	3	0	0	0	0	0		1	0	0	0	0	0	0	0	0	0	0	0	0
2	2015-01-30 14:05:23	2015-01-30 16:01:38	2015-01-30	359000000000000	Collins	Malambo	Vg31	25	7	5	1	17	1	4	2	1		1	4	2	7	3	0	0	1	0	0		1	0	0	0	0	0	0	0	0	0	0	0	0
2	2015-01-30 14:08:23	2015-01-30 15:58:40	2015-01-30	359000000000000	Collins	Malambo	Vg31	25	1	3	2	56	1	1	2	1		1	4	2	7	3	0	0	0	0	0		1	0	0	0	0	0	0	0	0	0	0	0	0
2	2015-01-30 14:09:37	2015-01-30 19:17:44	2015-01-30	359000000000000	Gausi	Malambo	Vg52	12	3	5	1	18	1	4	2	5		4	1	2	7	3	0	0	0	0	0		1	0	0	0	0	0	0	0	0	0	0	0	0
2	2015-01-30 14:10:04	2015-01-30 16:38:14	2015-01-30	359000000000000	Phonex	Malambo	Vg13	22	1	1	1	57	1	1	3	4		1	4	2	7	3	0	0	0	0	0		1	0	0	0	0	0	0	0	0	0	0	0	0
2	2015-01-30 14:16:36	2015-01-30 16:30:56	2015-01-30	359000000000000	Valens	Malambo	Vg28	5	2	4	2	72	1	2	2	1		1	0	3	4	3	0	0	1	0	0		1	0	0	0	0	0	0	0	0	0	0	0	0
2	2015-01-30 14:20:55	2015-01-30 15:59:18	2015-01-30	359000000000000	Collins	Malambo	Vg31	27	1	3	2	26	1	1	3	1		2	2	0	4	3	0	0	0	0	0		1	0	0	0	0	0	0	0	0	0	0	0	0
2	2015-01-30 14:25:34	2015-01-30 19:48:13	2015-01-30	360000000000000	Saukila	Malambo	Vg40	34	2	3	2	44	1	1	2	1		3	4	2	9	3	0	0	0	0	0		1	0	0	0	0	0	0	0	0	0	0	0	0
2	2015-01-30 14:31:50	2015-01-30 19:48:36	2015-01-30	360000000000000	Saukila	Malambo	Vg40	34	4	5	2	19	1	4	3	5		3	4	2	9	3	0	0	0	0	0		1	0	0	0	0	0	0	0	0	0	0	0	0
2	2015-01-30 14:32:05	2015-01-30 16:31:17	2015-01-30	359000000000000	Valens	Malambo	Vg28	5	4	2	1	78	1	1	2	other	He cant work	1	0	3	4	3	0	0	1	0	0		1	0	0	0	0	0	0	0	0	0	0	0	0
2	2015-01-30 14:37:08	2015-01-30 19:49:01	2015-01-30	360000000000000	Saukila	Malambo	Vg40	34	6	5	2	16	1	4	2	5		3	4	2	9	3	0	0	0	0	0		1	0	0	0	0	0	0	0	0	0	0	0	0
2	2015-01-30 14:43:59	2015-01-30 16:09:23	2015-01-30	358000000000000	Francis	Malambo	Vg31	6	2	3	2	19	1	1	3	1		0	2	0	2	3	0	0	0	0	0		1	0	0	0	0	0	0	0	0	0	0	0	0
2	2015-01-30 14:50:28	2015-01-30 19:18:26	2015-01-30	359000000000000	Gausi	Malambo	Vg52	16	1	1	1	29	1	1	2	1		2	2	0	4	3	0	0	0	0	0		1	0	0	0	0	0	0	0	0	0	0	0	0
2	2015-01-30 14:51:43	2015-01-30 19:49:54	2015-01-30	360000000000000	Saukila	Malambo	Vg40	25	1	1	1	34	1	1	3	1		3	2	0	5	3	0	0	0	0	0		1	0	0	0	0	0	0	0	0	0	0	0	0
2	2015-01-30 14:57:13	2015-01-30 19:18:52	2015-01-30	359000000000000	Gausi	Malambo	Vg52	16	2	3	2	27	1	1	2	1		2	2	0	4	3	0	0	0	0	0		1	0	0	0	0	0	0	0	0	0	0	0	0
2	2015-01-30 15:03:45	2015-01-30 19:50:38	2015-01-30	360000000000000	Saukila	Malambo	Vg40	12	2	3	2	22	1	1	3	1		2	2	0	4	3	0	0	0	0	0		1	0	0	0	0	0	0	0	0	0	0	0	0
2	2015-01-30 15:08:28	2015-01-30 19:50:53	2015-01-30	360000000000000	Saukila	Malambo	Vg40	12	1	1	1	23	1	1	2	1		2	2	0	4	3	0	0	0	0	0		1	0	0	0	0	0	0	0	0	0	0	0	0
2	2015-01-30 15:12:56	2015-01-30 19:14:32	2015-01-30	358000000000000	Dalitso	Malambo	Vg48	46	2	3	2	61	1	1	1	1		2	0	2	4	3	0	0	0	0	0		1	0	0	0	0	0	0	0	0	0	0	0	0
2	2015-01-30 15:18:34	2015-01-30 19:51:24	2015-01-30	360000000000000	Saukila	Malambo	Vg40	11	2	3	2	33	1	1	3	1		3	2	0	5	3	0	0	0	0	0		1	0	0	0	0	1	0	0	0	0	0	1	0		media\1422624138674.jpg
2	2015-01-30 15:30:53	2015-01-30 19:51:57	2015-01-30	360000000000000	Saukila	Malambo	Vg40	36	1	1	2	75	1	3	2	1		2	1	1	4	3	0	0	0	0	0		1	0	0	0	0	0	0	0	0	0	0	0	0
2	2015-01-30 15:35:07	2015-01-30 19:52:14	2015-01-30	360000000000000	Saukila	Malambo	Vg40	36	4	6	2	15	1	4	2	5		2	1	1	4	3	0	0	0	0	0		1	0	0	0	0	0	0	0	0	0	0	0	0
2	2015-01-30 15:48:41	2015-01-30 19:29:49	2015-01-30	360000000000000	Patrick	Malambo	Vg41	5	4	5	2	23	1	2	2	1		2	3	2	7	3	0	0	0	0	0		1	0	0	0	0	0	0	0	0	0	0	0	0
2	2015-01-30 15:55:04	2015-01-30 19:52:35	2015-01-30	360000000000000	Saukila	Malambo	Vg40	37	2	3	2	27	1	1	3	1		2	2	0	4	3	0	0	0	0	0		1	0	0	0	0	0	0	0	0	0	0	0	0
2	2015-01-30 15:58:44	2015-01-30 19:53:11	2015-01-30	360000000000000	Saukila	Malambo	Vg40	37	1	1	1	28	1	1	3	2		2	2	0	4	3	0	0	0	0	0		1	0	0	0	0	0	0	0	0	0	0	0	0
2	2015-01-30 16:49:45	2015-01-30 19:31:16	2015-01-30	360000000000000	Patrick	Malambo	Vg41	44	5	5	1	19	1	4	2	1		3	4	2	9	3	0	0	0	0	0		1	0	0	0	0	0	0	0	0	0	0	0	0
2	2015-01-30 17:05:29	2015-01-30 19:31:44	2015-01-30	360000000000000	Patrick	Malambo	Vg41	44	1	1	1	53	1	1	2	1		3	4	2	9	3	0	0	0	0	0		1	0	0	0	0	0	0	0	0	0	0	0	0
2	2015-02-02 12:37:46	2015-02-02 18:20:57	2015-02-02	359000000000000	Valens	THONJE	Vg10	6	1	1	2	54	1	2	2	1		2	3	1	6	3	0	0	1	0	0		1	0	0	0	0	0	0	0	0	0	0	0	0
2	2015-02-02 12:40:41	2015-02-02 18:19:10	2015-02-02	359000000000000	Gausi	Thonje	Vg16	1	2	3	2	23	1	1	2	1		4	5	1	10	3	0	0	0	0	0		1	0	0	0	0	0	0	0	0	0	0	0	0
2	2015-02-02 12:46:22	2015-02-02 18:14:37	2015-02-02	359000000000000	Collins	Thonje	Vg26	34	2	5	1	22	1	4	1	1		2	2	1	5	3	0	0	0	0	0		1	0	0	0	0	0	0	0	0	0	0	0	0
2	2015-02-02 12:47:34	2015-02-02 19:18:47	2015-02-02	358000000000000	Dalitso	Thonje	Vg3	21	1	1	2	62	1	3	1	3		2	0	1	3	3	0	0	0	0	0		1	0	0	0	0	0	0	0	0	0	0	0	0
2	2015-02-02 12:47:35	2015-02-02 17:55:19	2015-02-02	356000000000000	Maureen	Thonje	Vg24	23	1	1	1	32	1	1	2	1		2	2	0	4	3	0	0	0	0	0		1	0	0	0	0	0	0	0	0	0	0	0	0
2	2015-02-02 12:49:09	2015-02-02 18:15:03	2015-02-02	359000000000000	Collins	Thonje	Vg26	34	3	5	2	20	1	4	1	1		2	2	1	5	3	0	0	0	0	0		1	0	0	0	0	0	0	0	0	0	0	0	0
2	2015-02-02 12:54:08	2015-02-02 19:03:46	2015-02-02	360000000000000	Patrick	Thonje	Vg14	18	1	1	2	45	1	3	1	1		3	1	1	5	3	0	0	0	0	0		1	0	0	0	0	0	0	0	0	0	0	0	0
2	2015-02-02 12:55:16	2015-02-02 17:42:48	2015-02-02	356000000000000	Halima	Thonje	Vg12	10	1	3	2	41	1	1	2	1		1	1	2	4	3	0	0	0	0	0		1	0	0	0	0	0	0	0	0	0	0	0	0
2	2015-02-02 12:56:09	2015-02-02 18:42:16	2015-02-02	360000000000000	Kalua	Thonje	Vg20	16	2	3	2	34	1	1	2	1		3	2	0	5	3	0	0	0	0	0		1	0	0	0	0	0	0	0	0	0	0	0	0
2	2015-02-02 13:00:26	2015-02-02 17:55:35	2015-02-02	356000000000000	Maureen	Thonje	Vg24	23	2	3	2	24	1	1	2	1		2	2	0	4	3	0	0	0	0	0		1	0	0	0	0	0	0	0	0	0	0	0	0
2	2015-02-02 13:00:54	2015-02-02 18:43:12	2015-02-02	360000000000000	Kalua	Thonje	Vg20	10	1	6	1	84	1	3	2	1		3	1	3	7	3	0	0	0	0	0		1	0	0	0	0	0	0	0	0	0	0	0	0
2	2015-02-02 13:02:09	2015-02-02 18:04:06	2015-02-02	359000000000000	Phonex	Thonje	Vg17	13	2	3	2	38	1	1	2	1		3	3	1	7	3	0	0	0	0	0		1	0	0	0	0	0	0	0	0	0	0	0	0
2	2015-02-02 13:10:24	2015-02-02 17:58:47	2015-02-02	356000000000000	Maureen	Thonje	Vg24	25	1	1	1	80	1	1	1	1		0	0	2	2	3	0	0	1	0	0		1	0	0	0	0	0	0	0	0	0	0	0	0
2	2015-02-02 13:11:02	2015-02-02 18:15:58	2015-02-02	359000000000000	Collins	Thonje	Vg26	23	1	1	1	45	1	1	2	1		2	1	1	4	3	0	0	0	0	0		1	0	0	0	0	1	0	0	0	0	0	1	0		media\1422875774145.jpg
2	2015-02-02 13:18:58	2015-02-02 19:05:29	2015-02-02	360000000000000	Patrick	Thonje	Vg14	9	3	5	2	18	1	4	3	1		2	1	2	5	3	0	0	1	1	0		1	0	0	0	0	0	0	0	0	0	0	0	0
2	2015-02-02 13:19:00	2015-02-02 17:59:11	2015-02-02	356000000000000	Maureen	Thonje	Vg24	25	2	3	2	71	1	1	1	1		0	0	2	2	3	0	0	1	0	0		1	0	0	0	0	0	0	0	0	0	0	0	0
2	2015-02-02 13:21:58	2015-02-02 18:16:23	2015-02-02	359000000000000	Collins	Thonje	Vg26	23	2	3	2	33	1	1	1	1		2	1	1	4	3	0	0	0	0	0		1	0	0	0	0	0	0	0	0	0	0	0	0
2	2015-02-02 13:26:34	2015-02-02 18:21:55	2015-02-02	359000000000000	Valens	THONJE	Vg10	11	3	5	1	18	1	4	3	5		2	1	2	5	3	0	0	1	0	0		1	0	0	0	0	0	0	0	0	0	0	0	0
2	2015-02-02 13:28:38	2015-02-02 19:06:02	2015-02-02	360000000000000	Patrick	Thonje	Vg14	9	2	3	2	45	1	1	1	1		2	1	2	5	3	0	0	0	0	0		1	0	0	0	0	0	0	0	0	0	0	0	0
2	2015-02-02 13:32:45	2015-02-02 17:59:45	2015-02-02	356000000000000	Maureen	Thonje	Vg24	21	1	5	2	21	1	2	2	1		3	1	1	5	3	0	0	0	0	0		1	0	0	0	0	0	0	0	0	0	0	0	0
2	2015-02-02 13:34:23	2015-02-02 18:22:15	2015-02-02	359000000000000	Valens	THONJE	Vg10	11	1	3	2	45	1	1	2	1		2	1	2	5	3	0	0	0	0	0		1	0	0	0	0	0	0	0	0	0	0	0	0
2	2015-02-02 13:34:24	2015-02-02 18:45:29	2015-02-02	360000000000000	Kalua	Thonje	Vg20	10	3	3	2	56	1	1	2	1		3	1	3	7	3	0	0	0	0	0		1	0	0	0	0	0	0	0	0	0	0	0	0
2	2015-02-02 13:36:51	2015-02-02 18:29:56	2015-02-02	358000000000000	Francis	Thonje	Vg1	8	1	1	1	71	1	1	3	1		2	1	2	5	3	0	0	1	0	0		1	0	0	0	0	0	0	0	0	0	0	0	0
2	2015-02-02 13:39:59	2015-02-02 18:17:08	2015-02-02	359000000000000	Collins	Thonje	Vg26	18	3	5	1	18	1	4	3	5		0	2	2	4	3	0	0	0	0	0		1	0	0	0	0	0	0	0	0	0	0	0	0
2	2015-02-02 13:40:54	2015-02-02 18:10:14	2015-02-02	359000000000000	Phonex	Thonje	Vg17	16	1	1	1	40	1	2	2	2		0	1	1	2	3	0	0	1	0	0		1	0	0	0	0	0	0	0	0	0	0	1	0		media\1422877692731.jpg
2	2015-02-02 13:41:58	2015-02-02 18:46:07	2015-02-02	360000000000000	Kalua	Thonje	Vg20	10	4	5	2	18	1	4	2	5		3	1	3	7	3	0	0	0	0	0		1	0	0	0	0	0	0	0	0	0	0	0	0
2	2015-02-02 13:44:03	2015-02-02 18:17:22	2015-02-02	359000000000000	Collins	Thonje	Vg26	18	2	3	2	40	1	1	1	1		0	2	2	4	3	0	0	0	0	0		1	0	0	0	0	1	0	0	0	0	0	1	0		media\1422877648312.jpg
2	2015-02-02 13:45:22	2015-02-02 18:30:08	2015-02-02	358000000000000	Francis	Thonje	Vg1	8	2	3	2	64	1	1	2	1		2	1	2	5	3	0	0	0	0	0		1	0	0	0	0	0	0	0	0	0	0	0	0
2	2015-02-02 13:46:21	2015-02-02 17:45:36	2015-02-02	356000000000000	Halima	Thonje	Vg12	21	2	1	1	36	1	1	2	2		4	3	0	7	3	0	0	0	0	0		1	0	0	0	0	0	0	0	0	0	0	0	0
2	2015-02-02 13:48:29	2015-02-02 18:17:44	2015-02-02	359000000000000	Collins	Thonje	Vg26	18	4	5	2	18	1	4	2	1		0	2	2	4	3	0	0	0	0	0		1	0	0	0	0	0	0	0	0	0	0	0	0
2	2015-02-02 13:50:21	2015-02-02 18:30:29	2015-02-02	358000000000000	Francis	Thonje	Vg1	8	5	5	2	28	1	3	3	1		2	1	2	5	3	0	0	0	0	0		1	0	0	0	0	0	0	0	0	0	0	0	0
2	2015-02-02 13:52:23	2015-02-02 18:22:53	2015-02-02	359000000000000	Valens	THONJE	Vg10	13	1	1	1	43	1	1	2	1		0	2	2	4	3	0	0	0	0	0		1	0	0	0	0	0	0	0	0	0	0	0	0
2	2015-02-02 13:52:44	2015-02-02 18:00:16	2015-02-02	356000000000000	Maureen	Thonje	Vg24	15	1	1	2	32	1	3	1	1		3	2	1	6	3	0	0	0	0	0		1	0	0	0	0	0	0	0	0	0	0	0	0
2	2015-02-02 13:58:12	2015-02-02 19:20:37	2015-02-02	358000000000000	Dalitso	Thonje	Vg3	8	1	1	1	37	1	1	3	1		3	3	0	6	3	0	0	0	0	0		1	0	0	0	0	0	0	0	0	0	0	0	0
2	2015-02-02 13:58:27	2015-02-02 18:23:08	2015-02-02	359000000000000	Valens	THONJE	Vg10	13	2	3	2	41	1	1	2	1		0	2	2	4	3	0	0	0	0	0		1	0	0	0	0	0	0	0	0	0	0	0	0
2	2015-02-02 13:59:29	2015-02-02 18:24:26	2015-02-02	359000000000000	Gausi	Thonje	Vg16	18	1	1	2	31	1	2	1	1		3	1	0	4	3	0	0	0	0	0		1	0	0	0	0	0	0	0	0	0	0	0	0
2	2015-02-02 14:01:52	2015-02-02 19:21:16	2015-02-02	358000000000000	Dalitso	Thonje	Vg3	8	2	3	2	31	1	1	2	1		3	3	0	6	3	0	0	0	0	0		1	0	0	0	0	0	0	0	0	0	0	0	0
2	2015-02-02 14:02:57	2015-02-02 18:48:48	2015-02-02	360000000000000	Kalua	Thonje	Vg20	4	3	5	2	20	1	4	3	5		3	3	1	7	3	0	0	0	0	0		1	0	0	0	0	0	0	0	0	0	0	0	0
2	2015-02-02 14:06:21	2015-02-02 18:30:56	2015-02-02	358000000000000	Francis	Thonje	Vg1	9	5	1	2	61	1	3	2	1		2	3	1	6	3	0	0	0	0	0		1	0	0	0	0	0	0	0	0	0	0	0	0
2	2015-02-02 14:07:22	2015-02-02 18:49:28	2015-02-02	360000000000000	Kalua	Thonje	Vg20	4	4	5	2	17	1	4	3	1		3	3	1	7	3	0	0	0	0	0		1	0	0	0	0	0	0	0	0	0	0	0	0
2	2015-02-02 14:09:04	2015-02-02 18:23:19	2015-02-02	359000000000000	Valens	THONJE	Vg10	13	3	5	1	21	1	4	3	1		0	2	2	4	3	0	0	0	0	0		1	0	1	0	0	0	0	0	0	0	1	1	0		media\1422879248045.jpg	media\1422879270091.jpg	media\1422879286694.jpg
2	2015-02-02 14:10:08	2015-02-02 18:00:29	2015-02-02	356000000000000	Maureen	Thonje	Vg24	15	3	5	2	18	1	4	3	5		3	2	1	6	3	0	0	0	0	0		1	0	0	0	0	0	0	0	0	0	0	0	0
2	2015-02-02 14:10:36	2015-02-02 19:08:49	2015-02-02	360000000000000	Patrick	Thonje	Vg14	10	2	3	2	22	1	1	2	1		2	2	0	4	3	0	0	1	0	0		1	0	0	0	0	0	0	0	0	0	0	0	0
2	2015-02-02 14:16:38	2015-02-02 18:23:33	2015-02-02	359000000000000	Valens	THONJE	Vg10	13	4	5	2	18	1	4	3	5		0	2	2	4	3	0	0	0	0	0		1	0	0	0	0	0	0	0	0	0	0	0	0
2	2015-02-02 14:20:50	2015-02-02 18:18:10	2015-02-02	359000000000000	Collins	Thonje	Vg26	14	2	3	2	21	1	1	2	1		2	2	0	4	3	0	1	0	0	0		1	0	0	0	0	0	0	0	0	0	0	0	0
2	2015-02-02 14:22:17	2015-02-02 18:10:57	2015-02-02	359000000000000	Phonex	Thonje	Vg17	32	2	3	2	20	1	1	2	3		1	2	0	3	3	0	0	0	0	0		1	0	0	0	0	0	0	0	0	0	0	0	0
2	2015-02-02 14:26:27	2015-02-02 18:18:22	2015-02-02	359000000000000	Collins	Thonje	Vg26	14	1	1	1	25	1	1	2	2		2	2	0	4	3	0	0	0	0	0		1	0	0	0	0	0	0	0	0	0	0	0	0
2	2015-02-02 14:33:40	2015-02-02 19:09:44	2015-02-02	360000000000000	Patrick	Thonje	Vg14	2	4	5	1	15	1	4	2	3		1	3	1	5	3	0	0	0	0	0		1	0	0	0	0	0	0	0	0	0	0	0	0
2	2015-02-02 14:37:00	2015-02-02 18:25:32	2015-02-02	359000000000000	Gausi	Thonje	Vg16	1	7	6	1	27	1	4	3	1		4	5	1	10	3	0	0	0	0	0		1	0	0	0	0	0	0	0	0	0	0	0	0
2	2015-02-02 14:37:38	2015-02-02 19:10:34	2015-02-02	360000000000000	Patrick	Thonje	Vg14	2	3	5	2	19	1	4	2	3		1	3	1	5	3	0	0	0	0	0		1	0	0	0	0	0	0	0	0	0	0	0	0
2	2015-02-02 14:40:08	2015-02-02 18:18:44	2015-02-02	359000000000000	Collins	Thonje	Vg26	13	1	1	1	58	1	1	2	1		1	0	2	3	3	0	0	0	1	0		1	0	0	0	0	0	0	0	0	0	0	0	0
2	2015-02-02 14:40:50	2015-02-02 19:12:05	2015-02-02	360000000000000	Patrick	Thonje	Vg14	2	2	3	2	39	1	1	2	3		1	3	1	5	3	0	0	1	0	0		1	0	0	0	0	1	0	0	0	0	0	1	0		media\1422881130419.jpg
2	2015-02-02 14:42:59	2015-02-02 18:31:43	2015-02-02	358000000000000	Francis	Thonje	Vg1	24	2	5	2	19	1	2	1	1		1	1	1	3	3	0	0	0	0	0		1	0	0	0	0	0	0	0	0	0	0	0	0
2	2015-02-02 14:43:08	2015-02-02 18:52:36	2015-02-02	360000000000000	Kalua	Thonje	Vg20	25	1	1	2	60	1	3	2	1		1	2	1	4	3	0	0	0	0	0		1	0	0	0	0	0	0	0	0	0	0	0	0
2	2015-02-02 14:43:23	2015-02-02 17:47:01	2015-02-02	356000000000000	Halima	Thonje	Vg12	14	1	1	1	33	1	1	2	2		2	4	0	6	3	0	0	0	0	0		1	0	0	0	0	0	0	0	0	0	0	0	0
2	2015-02-02 14:46:54	2015-02-02 18:31:59	2015-02-02	358000000000000	Francis	Thonje	Vg1	24	1	1	2	56	1	2	2	1		1	1	1	3	3	0	0	0	0	0		1	0	0	0	0	0	0	0	0	0	0	0	0
2	2015-02-02 14:47:37	2015-02-02 18:02:16	2015-02-02	356000000000000	Maureen	Thonje	Vg24	5	1	1	2	24	1	2	2	2		2	1	0	3	3	0	0	0	0	0		1	0	0	0	0	0	0	0	0	0	0	0	0
2	2015-02-02 14:49:15	2015-02-02 19:25:09	2015-02-02	360000000000000	Eddah	Thonje	Vg18	2	1	1	1	34	1	1	3	1		3	2	0	5	3	0	0	0	0	0		1	0	0	0	0	0	0	0	0	0	0	0	0
2	2015-02-02 14:50:59	2015-02-02 19:12:44	2015-02-02	360000000000000	Patrick	Thonje	Vg14	2	1	1	1	40	1	1	2	3		1	3	1	5	3	0	0	0	0	0		1	0	0	0	0	0	0	0	0	0	0	0	0
2	2015-02-02 14:57:24	2015-02-02 19:25:38	2015-02-02	360000000000000	Eddah	Thonje	Vg18	2	2	3	2	29	1	1	2	1		3	2	0	5	3	0	0	0	0	0		1	0	0	0	0	0	0	0	0	0	0	0	0
2	2015-02-02 15:00:56	2015-02-02 18:28:37	2015-02-02	359000000000000	Gausi	Thonje	Vg16	37	1	1	1	79	1	1	3	1		0	1	1	2	3	0	0	0	0	0		1	0	0	0	0	0	0	0	0	0	0	0	0
2	2015-02-02 15:04:24	2015-02-02 18:11:41	2015-02-02	359000000000000	Phonex	Thonje	Vg17	36	1	1	1	29	1	1	2	1		3	2	0	5	3	0	0	1	0	0		1	0	0	0	0	0	0	0	0	0	0	1	0		media\1422882669587.jpg
2	2015-02-02 15:08:07	2015-02-02 18:25:41	2015-02-02	359000000000000	Valens	THONJE	Vg10	19	1	1	1	36	1	1	2	1		5	2	0	7	3	0	0	0	0	0		1	0	0	0	0	0	0	0	0	0	0	0	0
2	2015-02-02 15:13:14	2015-02-02 18:03:44	2015-02-02	356000000000000	Maureen	Thonje	Vg24	9	1	4	2	51	1	3	1	3		2	1	1	4	3	0	0	0	0	0		1	0	0	0	0	0	0	0	0	0	0	0	0
2	2015-02-02 15:18:57	2015-02-02 17:51:44	2015-02-02	356000000000000	Halima	Thonje	Vg12	7	1	1	2	32	1	2	2	1		2	3	0	5	2	0	0	0	0	0		1	0	0	0	0	0	0	0	0	0	0	0	0
2	2015-02-02 15:20:08	2015-02-02 18:12:19	2015-02-02	359000000000000	Phonex	Thonje	Vg17	36	2	3	2	26	1	1	2	1		3	2	0	5	3	0	0	0	0	0		1	0	0	0	0	0	0	0	0	0	0	0	0
2	2015-02-02 15:22:52	2015-02-02 18:26:16	2015-02-02	359000000000000	Valens	THONJE	Vg10	6	2	5	2	17	1	4	3	5		2	3	1	6	3	0	0	0	0	0		1	0	0	0	0	0	0	0	0	0	0	1	0		media\1422883671566.jpg
2	2015-02-02 15:25:56	2015-02-02 17:49:52	2015-02-02	356000000000000	Halima	Thonje	Vg12	7	2	6	2	20	1	1	2	3		2	3	0	5	3	0	0	0	0	0		1	0	0	0	0	0	0	0	0	0	0	0	0
2	2015-02-02 15:34:31	2015-02-02 18:26:30	2015-02-02	359000000000000	Valens	THONJE	Vg10	6	4	5	1	17	1	4	2	5		2	3	1	6	3	0	0	0	0	0		1	0	0	0	0	0	0	0	0	0	0	0	0
2	2015-02-02 15:48:55	2015-02-02 19:26:52	2015-02-02	360000000000000	Eddah	Thonje	Vg18	6	3	4	2	80	1	3	1	1		5	1	2	8	3	0	0	0	0	0		1	0	0	0	0	0	0	0	0	0	0	0	0
2	2015-03-02 10:49:47	2015-03-03 07:03:47	2015-03-02	360000000000000	Kalua	Khuwi	Vg145	2	2	3	2	21	1	1	2	1		4	3	1	8	3	0	0	0	0	0		1	0	0	0	0	0	0	0	0	0	0	0	0
2	2015-03-02 11:05:08	2015-03-03 07:06:19	2015-03-02	360000000000000	Kalua	KHUWI	Vg145	6	1	1	1	27	1	1	2	1		2	2	0	4	3	0	0	0	0	0		1	0	0	0	0	0	0	0	0	0	0	0	0
2	2015-03-02 11:15:20	2015-03-03 07:06:39	2015-03-02	360000000000000	Kalua	Khuwi	Vg145	6	2	3	2	31	1	1	2	1		2	2	0	4	3	0	0	0	0	0		1	0	0	0	0	0	0	0	0	0	0	0	0
2	2015-03-02 11:25:24	2015-03-03 07:07:36	2015-03-02	360000000000000	Kalua	Khuwi	Vg145	8	1	1	1	46	1	1	2	1		5	2	1	8	3	0	0	0	0	0		1	0	0	0	0	0	0	0	0	0	0	0	0
2	2015-03-02 11:35:10	2015-03-03 07:08:17	2015-03-02	360000000000000	Kalua	Khuwi	Vg145	8	2	3	2	30	1	1	2	1		5	2	1	8	3	0	0	0	0	0		1	0	0	0	0	0	0	0	0	0	0	0	0
2	2015-03-02 11:52:49	2015-03-03 07:09:33	2015-03-02	360000000000000	Kalua	Khuwi	Vg145	10	2	3	2	29	1	1	2	1		3	2	0	5	3	0	0	0	0	0		1	0	0	0	0	0	0	0	0	0	0	0	0
2	2015-03-02 11:57:21	2015-03-03 07:10:32	2015-03-02	360000000000000	Kalua	Khuwi	Vg145	13	1	1	1	22	1	1	2	1		2	2	0	4	3	0	0	0	0	0		1	0	0	0	0	0	0	0	0	0	0	0	0
2	2015-03-02 12:06:33	2015-03-03 07:10:51	2015-03-02	360000000000000	Kalua	Khuwi	Vg145	13	2	3	2	18	1	1	2	1		2	2	0	4	3	0	0	0	0	0		1	0	0	0	0	0	0	0	0	0	0	0	0
2	2015-03-02 12:18:56	2015-03-03 07:11:34	2015-03-02	360000000000000	Kalua	Khuwi	Vg145	16	2	3	2	21	1	1	2	1		1	2	0	3	3	0	0	0	0	0		1	0	0	0	0	0	0	0	0	0	0	0	0
2	2015-03-02 12:33:48	2015-03-03 07:12:57	2015-03-02	360000000000000	Kalua	Khuwi	Vg145	18	1	1	1	42	1	1	2	1		4	2	2	8	3	0	0	0	0	0		1	0	0	0	0	0	0	0	0	0	0	0	0
2	2015-03-02 12:37:23	2015-03-03 07:13:11	2015-03-02	360000000000000	Kalua	Khuwi	Vg145	18	2	3	2	40	1	1	2	1		4	2	2	8	3	0	0	0	0	0		1	0	0	0	0	1	0	0	0	0	0	1	0		media\1425293093541.jpg
2	2015-03-02 13:12:10	2015-03-03 07:14:16	2015-03-02	360000000000000	Kalua	Khuwi	Vg145	1	3	6	1	20	1	4	2	5		1	2	2	5	3	0	0	0	0	0		1	0	0	0	0	0	0	0	0	0	0	0	0
2	2015-03-02 13:22:01	2015-03-03 07:14:56	2015-03-02	360000000000000	Kalua	Khuwi	Vg145	1	4	5	2	19	1	2	2	1		1	2	2	5	3	0	0	0	0	0		1	0	0	0	0	0	0	0	0	0	0	0	0
2	2015-03-03 11:17:54	2015-03-03 17:18:28	2015-03-03	360000000000000	Kalua	Khuwi	Vg17	21	1	1	1	42	1	1	2	1		4	4	1	9	3	0	0	0	0	0		1	0	0	0	0	0	0	0	0	0	0	0	0
2	2015-03-03 11:20:51	2015-03-03 17:18:54	2015-03-03	360000000000000	Kalua	Khuwi	Vg17	21	2	3	2	36	1	1	2	1		4	4	1	9	3	0	0	0	0	0		1	0	0	0	0	0	0	0	0	0	0	0	0
2	2015-03-03 11:45:16	2015-03-03 17:21:42	2015-03-03	360000000000000	Kalua	Khuwi	Vg17	14	1	1	1	75	1	1	2	1		2	1	2	5	3	0	0	0	0	0		1	0	0	0	0	0	0	0	0	0	0	0	0
2	2015-03-03 11:50:05	2015-03-03 17:22:19	2015-03-03	360000000000000	Kalua	Khuwi	Vg17	14	2	3	2	68	1	1	2	1		2	1	2	5	3	0	0	0	0	0		1	0	0	0	0	0	0	0	0	0	0	0	0
2	2015-03-03 12:03:51	2015-03-03 17:23:31	2015-03-03	360000000000000	Kalua	Khuwi	Vg17	1	1	1	1	77	1	1	2	1		1	0	2	3	3	0	0	0	0	0		1	0	0	0	0	0	0	0	0	0	0	0	0
2	2015-03-03 12:32:17	2015-03-03 17:24:52	2015-03-03	360000000000000	Kalua	Khuwi	Vg17	7	2	3	2	35	1	1	2	1		4	1	1	6	3	0	0	0	0	0		1	0	0	0	0	0	0	0	0	0	0	0	0
2	2015-03-03 12:50:11	2015-03-03 17:25:58	2015-03-03	360000000000000	Kalua	Khuwi	Vg17	31	2	3	2	46	1	1	2	1		4	2	2	8	3	0	0	0	0	0		1	0	0	0	0	0	0	0	0	0	0	0	0
2	2015-03-03 12:52:24	2015-03-03 17:27:03	2015-03-03	360000000000000	Kalua	Khuwi	Vg17	31	4	5	1	28	1	4	2	2		4	2	2	8	3	0	0	0	0	0		1	0	0	0	0	0	0	0	0	0	0	0	0
2	2015-03-04 09:37:03	2015-03-04 17:09:34	2015-03-04	360000000000000	Kalua	Khuwi	Vg211	28	2	3	2	21	1	1	2	1		2	2	0	4	3	0	0	0	0	0		1	0	0	0	0	0	0	0	0	0	0	0	0
2	2015-03-04 09:50:54	2015-03-04 17:11:44	2015-03-04	360000000000000	Kalua	Khuwi	Vg211	40	2	3	2	21	1	1	2	1		4	3	1	8	3	0	0	0	0	0		1	0	0	0	0	0	0	0	0	0	0	0	0
2	2015-03-04 09:53:59	2015-03-04 17:12:20	2015-03-04	360000000000000	Kalua	Khuwi	Vg211	40	1	1	1	28	1	1	2	1		4	3	1	8	3	0	0	0	0	0		1	0	0	0	0	0	0	0	0	0	0	0	0
2	2015-03-04 09:55:48	2015-03-04 17:12:36	2015-03-04	360000000000000	Kalua	Khuwi	Vg211	40	3	4	2	48	1	3	2	1		4	3	1	8	3	0	0	0	0	0		1	0	0	0	0	0	0	0	0	0	0	0	0
2	2015-03-04 09:58:20	2015-03-04 17:13:06	2015-03-04	360000000000000	Kalua	Khuwi	Vg211	40	4	6	2	15	1	1	2	1		4	3	1	8	3	0	0	0	0	0		1	0	0	0	0	0	0	0	0	0	0	0	0
2	2015-03-04 10:19:01	2015-03-04 17:16:12	2015-03-04	360000000000000	Kalua	Khuwi	Vg211	10	3	5	2	24	1	2	2	1		3	3	2	8	3	0	0	0	0	0		1	0	0	0	0	0	0	0	0	0	0	0	0
2	2015-03-04 10:23:51	2015-03-04 17:16:26	2015-03-04	360000000000000	Kalua	Khuwi	Vg211	10	1	1	1	55	1	1	2	1		3	3	2	8	3	0	0	0	0	0		1	0	0	0	0	0	0	0	0	0	0	0	0
2	2015-03-04 10:25:28	2015-03-04 17:16:56	2015-03-04	360000000000000	Kalua	Khuwi	Vg211	10	2	3	2	49	1	1	2	1		3	3	2	8	3	0	0	0	0	0		1	0	0	0	0	0	0	0	0	0	0	0	0
2	2015-03-04 10:27:12	2015-03-04 17:17:16	2015-03-04	360000000000000	Kalua	Khuwi	Vg211	10	4	5	1	22	1	4	2	1		3	3	2	8	3	0	0	0	0	0		1	0	0	0	0	0	0	0	0	0	0	0	0
2	2015-03-04 10:28:54	2015-03-04 17:18:56	2015-03-04	360000000000000	Kalua	Khuwi	Vg211	10	5	5	2	19	1	4	2	1		3	3	2	8	3	0	0	0	0	0		1	0	0	0	0	0	0	0	0	0	0	0	0
2	2015-03-04 10:42:26	2015-03-04 17:20:13	2015-03-04	360000000000000	Kalua	Khuwi	Vg211	19	1	1	1	50	1	1	2	1		4	3	2	9	3	0	0	0	0	0		1	0	0	0	0	0	0	0	0	0	0	0	0
2	2015-03-04 10:44:22	2015-03-04 17:20:38	2015-03-04	360000000000000	Kalua	Khuwi	Vg211	19	2	3	2	43	1	1	2	1		4	3	2	9	3	0	0	0	0	0		1	0	0	0	0	0	0	0	0	0	0	0	0
2	2015-03-04 10:46:02	2015-03-04 17:21:11	2015-03-04	360000000000000	Kalua	Khuwi	Vg211	19	3	5	1	21	1	1	2	1		4	3	2	9	3	0	0	0	0	0		1	0	0	0	0	0	0	0	0	0	0	0	0
2	2015-03-04 10:47:51	2015-03-04 17:21:36	2015-03-04	360000000000000	Kalua	Khuwi	Vg211	19	4	6	2	20	1	1	2	1		4	3	2	9	3	0	0	0	0	0		1	0	0	0	0	0	0	0	0	0	0	0	0
2	2015-03-04 10:50:54	2015-03-04 17:21:50	2015-03-04	360000000000000	Kalua	Khuwi	Vg211	19	5	5	1	15	1	4	2	1		4	3	2	9	3	0	0	0	0	0		1	0	0	0	0	0	0	0	0	0	0	0	0
2	2015-03-04 11:07:50	2015-03-04 17:22:42	2015-03-04	360000000000000	Kalua	Khuwi	Vg211	22	1	1	1	34	1	1	2	1		4	2	0	6	3	0	0	0	0	0		1	0	0	0	0	0	0	0	0	0	0	0	0
2	2015-03-04 11:10:31	2015-03-04 17:22:56	2015-03-04	360000000000000	Kalua	Khuwi	Vg211	22	2	3	2	30	1	1	2	1		4	2	0	6	3	0	0	0	0	0		1	0	0	0	0	0	0	0	0	0	0	0	0
2	2015-03-04 11:36:28	2015-03-04 17:24:06	2015-03-04	360000000000000	Kalua	Khuwi	Vg211	32	1	1	1	57	1	1	2	1		2	2	1	5	3	0	0	0	0	0		1	0	0	0	0	0	0	0	0	0	0	0	0
2	2015-03-04 11:41:41	2015-03-04 17:24:48	2015-03-04	360000000000000	Kalua	Khuwi	Vg211	32	3	5	2	16	1	4	2	1		2	2	1	5	3	0	0	0	0	0		1	0	0	0	0	0	0	0	0	0	0	0	0
2	2014-10-30 10:12:49	2014-10-30 17:44:06	2014-10-30	358000000000000	Francis	Chakhaza	Vg15	18	1	1	1	40	1	1	2	1		3	2	1	6	3	0	0	0	0	0		1	0	0	0	0	0	0	0	0	0	0	0	0
2	2014-10-30 10:18:30	2014-10-30 17:44:30	2014-10-30	358000000000000	Francis	Chakhaza	Vg15	18	2	3	2	36	1	1	1	1		3	2	1	6	3	0	0	0	0	0		1	0	0	0	0	0	0	0	0	0	0	1	0		media\1414657379792.jpg
2	2014-10-30 10:19:11	2014-11-05 13:35:47	2014-10-30	359000000000000	Collins	Chakhaza	Vg11	15	1	3	2	45	1	1	2	1		0	0	2	2	3	0	0	0	0	0		1	0	0	0	0	0	0	0	0	0	0	0	0
2	2014-10-30 10:20:42	2014-10-30 16:25:43	2014-10-30	360000000000000	Saukila	Chakhaza	Vg26	10	2	3	2	19	1	1	2	1		1	2	0	3	2	0	0	0	1	0		1	0	0	0	0	1	0	0	0	0	0	1	0		media\1414657670591.jpg
2	2014-10-30 10:20:53	2014-10-30 17:09:40	2014-10-30	360000000000000	Patrick	Chakhaza	Vg23	11	2	3	2	21	1	1	3	2		1	2	0	3	3	0	0	0	0	0		1	0	0	0	0	0	0	0	0	0	0	0	0
2	2014-10-30 10:21:36	2014-11-03 09:13:57	2014-10-30	356000000000000	Maureen	Chakhaza	Vg19	3	1	1	2	41	1	2	2	3		0	0	2	2	3	0	0	0	0	0		1	0	0	0	0	0	0	0	0	0	0	0	0
2	2014-10-30 10:23:23	2014-10-30 17:44:50	2014-10-30	358000000000000	Francis	Chakhaza	Vg15	18	3	5	1	16	1	4	2	5		3	2	1	6	3	0	0	0	0	0		1	0	0	0	0	0	0	0	0	0	0	0	0
2	2014-10-30 10:25:49	2014-10-31 16:16:30	2014-10-30	360000000000000	Eddah	Chakhaza	Vg25	14	1	1	1	39	1	1	1	1		4	2	0	6	3	0	0	0	0	0		1	0	0	0	0	0	0	0	0	0	0	0	0
2	2014-10-30 10:26:06	2014-11-05 14:56:33	2014-10-30	359000000000000	Gausi	Chakhaza	Vg21	8	1	1	1	36	1	1	3	2		4	4	0	8	2	0	0	0	0	0		1	0	0	0	0	0	0	0	0	0	0	0	0
2	2014-10-30 10:29:52	2014-10-30 17:57:48	2014-10-30	356000000000000	Maureen	Chakhaza	Vg19	3	2	4	2	71	1	3	2	1		0	0	2	2	3	0	0	0	0	0		1	0	0	0	0	0	0	0	0	0	0	0	0
2	2014-10-30 10:30:33	2014-10-30 15:57:01	2014-10-30	356000000000000	Victoria	Chakhaza	Vg2	15	1	1	1	58	1	1	2	1		2	2	2	6	2	0	0	0	0	0		1	0	0	0	0	0	0	0	0	0	0	0	0
2	2014-10-30 10:34:26	2014-10-30 17:45:29	2014-10-30	358000000000000	Francis	Chakhaza	Vg15	14	3	5	2	20	1	4	3	5		0	2	2	4	3	0	0	0	0	0		1	0	0	0	0	0	0	0	0	0	0	0	0
2	2014-10-30 10:35:07	2014-11-03 18:48:12	2014-10-30	359000000000000	Alex	Chakhaza	Vg17	11	1	1	1	44	1	1	2	2		2	2	2	6	3	0	0	0	0	0		1	0	0	0	0	1	0	0	0	0	0	1	0		media\1414659118767.jpg		media\1414662170930.jpg
2	2014-10-30 10:36:05	2014-11-05 14:11:34	2014-10-30	359000000000000	Gausi	Chakhaza	Vg21	8	2	3	2	25	1	1	2	1		4	4	0	8	3	0	0	0	0	0		1	0	0	0	0	0	0	0	0	0	0	0	0
2	2014-10-30 10:41:45	2014-10-31 16:17:08	2014-10-30	360000000000000	Eddah	Chakhaza	Vg25	14	2	3	2	35	1	1	2	1		4	2	0	6	3	0	0	0	0	0		1	0	0	0	0	0	0	0	0	0	0	0	0
2	2014-10-30 10:45:42	2014-11-05 13:35:57	2014-10-30	359000000000000	Collins	Chakhaza	Vg11	11	7	6	2	76	1	3	2	2		1	3	3	7	3	0	0	0	0	0		1	0	0	0	0	0	0	0	0	0	0	0	0
2	2014-10-30 10:49:38	2014-10-30 16:26:05	2014-10-30	360000000000000	Saukila	Chakhaza	Vg26	18	1	1	2	80	1	3	2	1		3	1	1	5	3	0	0	0	1	0		1	0	0	0	0	1	0	0	0	0	0	1	0		media\1414660029412.jpg
2	2014-10-30 10:51:05	2014-11-05 13:33:18	2014-10-30	359000000000000	Collins	Chakhaza	Vg11	11	1	3	2	40	1	1	2	2		1	3	3	7	3	0	0	0	0	0		1	0	0	0	0	0	0	0	0	0	0	1	0		media\1414659325015.jpg
2	2014-10-30 10:55:51	2014-10-30 17:10:16	2014-10-30	360000000000000	Patrick	Chakhaza	Vg23	5	3	4	2	75	1	3	2	2		4	6	1	11	3	0	0	0	0	0		1	0	0	0	0	0	0	0	0	0	0	0	0
2	2014-10-30 10:56:38	2014-10-31 16:17:52	2014-10-30	360000000000000	Eddah	Chakhaza	Vg25	15	1	1	1	31	1	1	2	1		3	2	0	5	3	0	0	0	0	0		1	0	0	0	0	0	0	0	0	0	0	0	0
2	2014-10-30 10:57:52	2014-11-03 18:47:41	2014-10-30	359000000000000	Alex	Chakhaza	Vg17	11	2	2	2	42	1	1	2	2		2	2	2	6	3	0	0	0	0	0		1	0	0	0	0	0	0	0	0	0	0	1	0		media\1414660755244.jpg	media\1414662375919.jpg
2	2014-10-30 11:03:31	2014-10-30 17:10:29	2014-10-30	360000000000000	Patrick	Chakhaza	Vg23	5	2	3	2	35	1	1	2	2		4	6	1	11	3	0	1	1	0	0		1	0	1	0	0	1	0	1	0	1	0	1	0		media\1414660381438.jpg	media\1414660407962.jpg
2	2014-10-30 11:06:57	2014-10-30 18:02:31	2014-10-30	356000000000000	Maureen	Chakhaza	Vg19	7	2	3	2	56	1	1	1	2		2	0	2	4	3	0	0	0	0	0		1	0	0	0	0	0	0	0	0	0	0	0	0
2	2014-10-30 11:10:01	2014-10-31 16:18:33	2014-10-30	360000000000000	Eddah	Chakhaza	Vg25	15	2	3	2	27	1	1	2	1		3	2	0	5	3	0	0	0	0	0		1	0	0	0	0	0	0	0	0	0	0	0	0
2	2014-10-30 11:11:29	2014-10-30 16:26:19	2014-10-30	360000000000000	Saukila	Chakhaza	Vg26	18	2	6	2	32	1	2	2	2		3	1	1	5	3	0	1	0	1	0		1	0	0	0	0	1	0	0	0	0	0	1	0		media\1414660849967.jpg
2	2014-10-30 11:21:13	2014-10-30 17:47:21	2014-10-30	358000000000000	Francis	Chakhaza	Vg15	4	2	3	2	26	1	1	2	1		3	2	0	5	3	0	0	0	0	0		1	0	0	0	0	0	0	0	0	0	0	0	0
2	2014-10-30 11:23:08	2014-10-30 16:00:02	2014-10-30	356000000000000	Victoria	Chakhaza	Vg2	17	1	1	2	74	1	3	1	1		1	1	1	3	3	0	0	0	0	0		1	0	0	0	0	0	0	0	0	0	0	0	0
2	2014-10-30 11:25:38	2014-11-05 13:31:37	2014-10-30	359000000000000	Collins	Chakhaza	Vg11	11	5	1	1	56	1	1	2	1		1	3	3	7	3	0	1	0	0	0		1	0	0	0	0	0	0	0	0	0	0	0	0
2	2014-10-30 11:31:59	2014-10-31 16:19:22	2014-10-30	360000000000000	Eddah	Chakhaza	Vg25	8	1	1	1	67	1	3	2	1		0	0	1	1	3	0	0	0	0	0		1	0	0	0	0	0	0	0	0	0	0	0	0
2	2014-10-30 11:35:02	2014-10-30 17:48:20	2014-10-30	358000000000000	Francis	Chakhaza	Vg15	6	1	1	2	44	1	2	1	1		0	1	1	2	3	0	0	0	0	0		1	0	0	0	0	0	0	0	0	0	0	0	0
2	2014-10-30 11:38:49	2014-10-30 16:27:04	2014-10-30	360000000000000	Saukila	Chakhaza	Vg26	22	2	3	2	31	1	1	2	1		3	2	0	5	3	0	0	0	0	0		1	0	0	0	0	1	0	0	0	0	0	1	0		media\1414662397356.jpg
2	2014-10-30 11:50:16	2014-11-05 13:30:51	2014-10-30	359000000000000	Collins	Chakhaza	Vg11	7	4	1	1	46	1	1	2	3		2	0	2	4	3	0	0	0	0	0		1	0	0	0	0	0	0	0	0	0	0	0	0
2	2014-10-30 11:55:11	2014-10-30 16:27:38	2014-10-30	360000000000000	Saukila	Chakhaza	Vg26	10	1	1	1	25	1	1	2	1		1	2	0	3	3	0	0	0	1	0		1	0	0	0	0	1	0	0	0	0	0	1	0		media\1414663422490.jpg
2	2014-10-30 12:00:10	2014-11-05 14:57:31	2014-10-30	359000000000000	Gausi	Chakhaza	Vg21	16	1	1	2	54	1	3	2	2		1	2	1	4	3	0	0	0	0	0		1	0	0	0	0	0	0	0	0	0	0	0	0
2	2014-10-30 12:09:10	2014-10-30 17:50:02	2014-10-30	358000000000000	Francis	Chakhaza	Vg15	1	1	1	1	31	1	1	2	1		1	3	0	4	3	0	0	0	0	0		1	0	0	0	0	0	0	0	0	0	0	0	0
2	2014-10-30 12:14:48	2014-11-05 13:30:35	2014-10-30	359000000000000	Collins	Chakhaza	Vg11	1	1	1	2	22	1	2	2	3		3	1	0	4	3	0	0	0	0	0		1	0	0	0	0	0	0	0	0	0	0	1	0		media\1414664484311.jpg
2	2014-10-30 12:33:43	2014-10-30 17:50:59	2014-10-30	358000000000000	Francis	Chakhaza	Vg15	29	1	1	1	76	1	1	2	2		0	0	2	2	3	0	1	0	0	0		1	0	0	0	0	0	0	0	0	0	0	0	0
2	2014-10-30 12:35:07	2014-10-31 16:20:55	2014-10-30	360000000000000	Eddah	Chakhaza	Vg25	19	2	3	2	33	1	1	2	1		4	2	0	6	3	0	0	0	0	0		1	0	0	0	0	0	0	0	0	0	0	0	0
2	2014-10-30 12:40:59	2014-11-05 13:30:05	2014-10-30	359000000000000	Collins	Chakhaza	Vg11	25	1	1	1	30	1	1	3	1		0	1	0	1	3	0	0	0	0	0		1	0	0	0	0	0	0	0	0	0	0	0	0
2	2014-10-30 12:41:41	2014-11-05 14:55:52	2014-10-30	359000000000000	Gausi	Chakhaza	Vg21	15	1	1	1	39	1	1	3	1		3	3	0	6	3	0	0	0	0	0		1	0	0	0	0	0	0	0	0	0	0	0	0
2	2014-10-30 12:44:07	2014-10-30 16:08:59	2014-10-30	356000000000000	Victoria	Chakhaza	Vg2	11	3	1	2	32	1	2	2	2		5	1	2	8	3	0	0	0	0	0		1	0	0	0	0	0	0	0	0	0	0	0	0
2	2014-10-30 12:44:40	2014-10-31 16:21:32	2014-10-30	360000000000000	Eddah	Chakhaza	Vg25	18	1	1	1	29	1	1	2	1		2	2	0	4	3	0	0	0	0	0		1	0	0	0	0	0	0	0	0	0	0	0	0
2	2014-10-30 12:49:20	2014-11-05 14:58:05	2014-10-30	359000000000000	Gausi	Chakhaza	Vg21	15	3	5	2	15	1	4	2	5		3	3	0	6	3	0	0	0	0	0		1	0	0	0	0	0	0	0	0	0	0	0	0
2	2014-10-30 12:55:50	2014-10-30 18:07:08	2014-10-30	356000000000000	Maureen	Chakhaza	Vg19	16	1	1	1	42	1	1	2	1		6	3	1	10	3	0	0	0	0	0		1	0	0	0	0	0	0	0	0	0	0	0	0
2	2014-10-30 12:56:36	2014-10-31 16:22:00	2014-10-30	360000000000000	Eddah	Chakhaza	Vg25	18	2	3	2	25	1	1	1	1		2	2	0	4	3	0	0	0	0	0		1	0	0	0	0	0	0	0	0	0	0	0	0
2	2014-10-30 13:00:05	2014-10-30 17:52:39	2014-10-30	358000000000000	Francis	Chakhaza	Vg15	19	2	3	2	25	1	1	1	1		4	2	0	6	3	0	0	0	0	0		1	0	0	0	0	0	0	0	0	0	0	0	0
2	2014-10-30 13:01:46	2014-10-30 16:03:18	2014-10-30	356000000000000	Victoria	Chakhaza	Vg2	3	1	3	2	19	1	1	2	2		1	2	0	3	3	0	0	0	0	0		1	0	0	0	0	0	0	0	0	0	0	0	0
2	2014-10-30 13:03:13	2014-10-30 17:52:56	2014-10-30	358000000000000	Francis	Chakhaza	Vg15	19	1	1	1	28	1	1	2	1		4	2	0	6	3	0	0	0	0	0		1	0	0	0	0	0	0	0	0	0	0	1	0		media\1414667288960.jpg
2	2014-10-30 13:15:06	2014-10-30 17:53:34	2014-10-30	358000000000000	Francis	Chakhaza	Vg15	14	1	1	1	47	1	1	2	1		0	2	2	4	3	0	0	0	0	0		1	0	0	0	0	0	0	0	0	0	0	0	0
2	2014-10-30 13:24:02	2014-10-30 16:04:37	2014-10-30	356000000000000	Victoria	Chakhaza	Vg2	1	1	1	2	72	1	3	1	1		2	1	1	4	3	0	0	0	0	0		1	0	0	0	0	0	0	0	0	0	0	1	0		media\1414668530117.jpg	media\1414668572257.jpg	media\1414668612239.jpg
2	2014-10-30 13:24:11	2014-11-05 15:41:21	2014-10-30	359000000000000	Gausi	Chakhaza	Vg21	21	1	1	1	43	1	1	2	1		3	2	1	6	3	0	0	0	0	0		1	0	0	0	0	0	0	0	0	0	0	0	0
2	2014-10-30 13:29:16	2014-11-05 14:59:02	2014-10-30	359000000000000	Gausi	Chakhaza	Vg21	21	2	3	2	38	1	1	2	1		3	2	1	6	3	0	0	0	0	0		1	0	0	0	0	0	0	0	0	0	0	0	0
2	2014-10-30 13:32:41	2014-10-30 17:54:14	2014-10-30	358000000000000	Francis	Chakhaza	Vg15	14	4	5	1	17	1	4	2	1		0	2	2	4	3	0	0	0	0	0		1	0	0	0	0	0	0	0	0	0	0	0	0
2	2014-10-30 13:34:18	2014-11-05 14:59:37	2014-10-30	359000000000000	Gausi	Chakhaza	Vg21	21	3	5	2	18	1	4	2	5		3	2	1	6	3	0	0	0	0	0		1	0	0	0	0	0	0	0	0	0	0	0	0
2	2014-10-30 13:37:38	2014-10-30 16:28:27	2014-10-30	360000000000000	Saukila	Chakhaza	Vg26	13	1	1	1	40	1	1	3	1		5	1	1	7	3	0	0	0	0	0		1	0	0	0	0	0	0	0	0	0	0	0	0
2	2014-10-30 13:39:26	2014-10-30 16:05:39	2014-10-30	356000000000000	Victoria	Chakhaza	Vg2	4	1	3	2	22	1	1	1	1		2	2	0	4	3	0	0	0	0	0		1	0	0	0	0	0	0	0	0	0	0	0	0
2	2014-10-30 13:40:17	2014-11-03 18:46:18	2014-10-30	359000000000000	Alex	Chakhaza	Vg17	23	1	1	1	27	1	1	2	4		2	2	0	4	3	0	0	0	0	0		1	0	0	0	0	0	0	0	0	0	0	0	0
2	2014-10-30 13:48:53	2014-10-30 18:11:30	2014-10-30	356000000000000	Maureen	Chakhaza	Vg19	13	1	1	2	31	1	3	3	2		0	1	0	1	3	0	0	0	0	0		1	0	0	0	0	0	0	0	0	0	0	0	0
2	2014-10-30 13:54:02	2014-11-05 13:28:35	2014-10-30	359000000000000	Collins	Chakhaza	Vg11	18	1	3	2	46	1	1	1	3		3	0	2	5	3	0	0	0	0	0		1	0	0	0	0	0	0	0	0	0	0	0	0
2	2014-10-30 14:02:18	2014-10-31 16:24:21	2014-10-30	360000000000000	Eddah	Chakhaza	Vg25	20	2	3	2	62	1	1	2	1		4	0	2	6	3	0	0	0	0	0		1	0	0	0	0	0	0	0	0	0	0	0	0
2	2014-10-30 14:05:18	2014-10-30 16:28:39	2014-10-30	360000000000000	Saukila	Chakhaza	Vg26	30	1	1	1	40	1	1	2	1		4	2	2	8	3	0	0	0	0	0		1	0	0	0	0	0	0	0	0	0	0	0	0
2	2014-10-30 14:07:56	2014-11-05 15:00:33	2014-10-30	359000000000000	Gausi	Chakhaza	Vg21	37	2	3	2	37	1	1	1	1		5	1	1	7	3	0	0	0	0	0		1	0	0	0	0	0	0	0	0	0	0	0	0
2	2014-10-30 14:11:40	2014-11-05 13:28:16	2014-10-30	359000000000000	Collins	Chakhaza	Vg11	15	2	1	1	54	1	1	2	1		0	0	2	2	3	0	0	0	0	0		1	0	0	0	0	0	0	0	0	0	0	0	0
2	2014-10-30 14:13:34	2014-10-30 17:13:30	2014-10-30	360000000000000	Patrick	Chakhaza	Vg23	16	1	3	2	38	1	1	2	1		5	4	2	11	3	0	0	1	0	0		1	0	0	0	0	0	0	0	0	0	0	0	0
2	2014-10-30 14:26:18	2014-10-30 16:29:08	2014-10-30	360000000000000	Saukila	Chakhaza	Vg26	30	7	6	2	35	1	2	2	1		4	2	2	8	3	0	0	0	0	0		1	0	0	0	0	0	0	0	0	0	0	0	0
2	2014-10-30 14:32:39	2014-11-05 15:01:08	2014-10-30	359000000000000	Gausi	Chakhaza	Vg21	40	1	1	1	33	1	1	2	1		2	2	0	4	3	0	0	0	0	0		1	0	0	0	0	0	0	0	0	0	0	0	0
2	2014-10-30 14:41:59	2014-10-30 17:14:08	2014-10-30	360000000000000	Patrick	Chakhaza	Vg23	16	9	5	2	21	1	2	3	1		5	4	2	11	3	0	0	0	0	0		1	0	0	0	0	0	0	0	0	0	0	0	0
2	2014-10-30 14:53:43	2014-10-30 16:06:28	2014-10-30	356000000000000	Victoria	Chakhaza	Vg26	33	1	3	2	40	1	1	2	1		2	0	2	4	3	0	0	0	0	0		1	0	0	0	0	0	0	0	0	0	0	0	0
2	2014-10-30 14:54:29	2014-10-30 16:29:50	2014-10-30	360000000000000	Saukila	Chakhaza	Vg26	31	1	1	1	31	1	1	3	1		4	2	0	6	3	0	0	0	0	0		1	0	0	0	0	0	0	0	0	0	0	0	0
2	2014-10-30 15:01:31	2014-10-30 18:20:35	2014-10-30	356000000000000	Maureen	Chakhaza	Vg19	19	1	1	2	55	1	3	2	1		0	2	1	3	3	0	0	0	0	0		1	0	0	0	0	0	0	0	0	0	0	0	0
2	2014-10-30 15:01:34	2014-10-30 16:30:02	2014-10-30	360000000000000	Saukila	Chakhaza	Vg26	31	2	3	2	29	1	1	2	1		4	2	0	6	3	0	0	0	0	0		1	0	0	0	0	0	0	0	0	0	0	0	0
2	2014-10-30 15:21:16	2014-10-30 18:21:45	2014-10-30	356000000000000	Maureen	Chakhaza	Vg19	19	3	6	2	16	1	4	3	1		0	2	1	3	3	0	0	0	0	0		1	0	0	0	0	0	0	0	0	0	0	1	0		media\1414675792093.jpg
2	2014-10-30 15:59:22	2014-11-05 13:27:42	2014-10-30	359000000000000	Collins	Chakhaza	Vg17	30	2	1	1	30	1	1	2	3		2	2	0	4	3	0	0	0	0	0		1	0	0	0	0	0	0	0	0	0	0	0	0
2	2014-10-30 16:02:28	2014-11-05 13:27:09	2014-10-30	359000000000000	Collins	Chakhaza	Vg30	17	1	3	2	23	1	1	2	3		2	2	0	4	3	0	0	0	0	0		1	0	0	0	0	0	0	0	0	0	0	0	0
2	2014-10-31 09:54:11	2014-10-31 15:37:10	2014-10-31	358000000000000	Francis	Chakhaza	Vg31	1	2	3	2	47	1	1	2	1		1	2	2	5	3	0	0	0	0	0		1	0	0	0	0	0	0	0	0	0	0	0	0
2	2014-10-31 10:25:07	2014-10-31 16:37:00	2014-10-31	360000000000000	Eddah	Chakhaza	Vg38	25	1	1	1	30	1	1	2	1		2	2	0	4	3	0	0	1	0	1	Heart palpitation	1	0	0	0	0	0	0	0	0	0	0	0	0
2	2014-10-31 10:40:54	2014-10-31 15:22:35	2014-10-31	356000000000000	Maureen	Chakhaza	Vg28	20	2	3	2	28	1	1	1	2		3	2	0	5	3	0	0	0	0	0		1	0	0	0	0	0	0	0	0	0	0	0	0
2	2014-10-31 10:42:02	2014-10-31 16:39:07	2014-10-31	360000000000000	Eddah	Chakhaza	Vg38	25	2	3	2	28	1	1	1	1		2	2	0	4	3	0	0	0	0	0		1	0	0	0	0	0	0	0	0	0	0	0	0
2	2014-10-31 11:02:38	2014-10-31 15:41:20	2014-10-31	358000000000000	Francis	Chakhaza	Vg31	24	1	1	1	42	1	1	2	1		2	3	2	7	3	0	0	1	0	0		1	0	0	0	0	0	0	0	0	0	0	0	0
2	2014-10-31 11:03:30	2014-10-31 16:20:59	2014-10-31	356000000000000	Victoria	Chakhaza	Vg4	10	1	3	2	26	1	1	2	1		5	2	0	7	3	0	0	0	0	0		1	0	0	0	0	0	0	0	0	0	0	0	0
2	2014-10-31 11:13:09	2014-10-31 15:41:43	2014-10-31	358000000000000	Francis	Chakhaza	Vg31	24	2	3	2	40	1	1	2	1		2	3	2	7	3	0	0	0	0	1	Chest pains	1	0	0	0	0	0	0	0	0	0	0	0	0
2	2014-10-31 11:29:35	2014-10-31 16:39:58	2014-10-31	360000000000000	Eddah	Chakhaza	Vg38	23	1	1	1	40	1	1	3	1		4	1	1	6	3	0	0	0	0	0		1	0	0	0	0	0	0	0	0	0	0	0	0
2	2014-10-31 11:35:14	2014-10-31 15:42:45	2014-10-31	358000000000000	Francis	Chakhaza	Vg31	16	1	1	2	22	1	2	2	1		1	2	0	3	3	0	0	0	0	0		1	0	0	0	0	0	0	0	0	0	0	0	0
2	2014-10-31 11:35:36	2014-10-31 15:26:50	2014-10-31	356000000000000	Maureen	Chakhaza	Vg28	28	2	3	2	47	1	1	2	2		2	0	2	4	3	0	0	0	0	0		1	0	0	0	0	0	0	0	0	0	0	1	0		media\1414748390511.jpg
2	2014-10-31 11:35:41	2014-11-03 18:41:48	2014-10-31	359000000000000	Alex	Chakhaza	Vg40	2	1	1	2	62	1	3	3	4		0	0	1	1	3	0	0	0	0	0		1	0	0	0	0	0	0	0	0	0	0	0	0
2	2014-10-31 11:50:34	2014-10-31 16:40:22	2014-10-31	360000000000000	Eddah	Chakhaza	Vg38	33	2	3	2	49	1	1	3	1		1	0	2	3	3	0	0	0	0	0		1	0	0	0	0	0	0	0	0	0	0	0	0
2	2014-10-31 11:55:44	2014-10-31 16:23:01	2014-10-31	356000000000000	Victoria	Chakhaza	Vg4	23	1	1	2	37	1	2	3	1		3	1	0	4	3	0	0	0	0	0		1	0	0	0	0	0	0	0	0	0	0	0	0
2	2014-10-31 11:56:50	2014-10-31 15:27:28	2014-10-31	356000000000000	Maureen	Chakhaza	Vg28	26	2	3	2	41	1	1	2	2		3	0	2	5	3	0	0	0	0	0		1	0	0	0	0	0	0	0	0	0	0	1	0		media\1414749776023.jpg
2	2014-10-31 11:58:29	2014-10-31 15:43:45	2014-10-31	358000000000000	Francis	Chakhaza	Vg31	9	2	3	2	24	1	1	2	1		2	3	0	5	3	0	0	0	0	0		1	0	0	0	0	0	0	0	0	0	0	1	0		media\1414749896479.jpg
2	2014-10-31 12:07:40	2014-10-31 16:08:55	2014-10-31	360000000000000	Patrick	Chakhaza	Vg36	34	5	6	2	21	1	1	3	2		1	2	2	5	3	0	0	0	0	0		1	0	0	0	0	0	0	0	0	0	0	0	0
2	2014-10-31 12:18:09	2014-10-31 16:41:06	2014-10-31	360000000000000	Eddah	Chakhaza	Vg38	28	1	1	1	42	1	1	1	1		6	2	1	9	3	0	0	0	0	0		1	0	0	0	0	0	0	0	0	0	0	0	0
2	2014-10-31 12:23:21	2014-10-31 15:45:25	2014-10-31	358000000000000	Francis	Chakhaza	Vg31	11	1	1	2	77	1	2	2	1		4	2	1	7	3	0	0	0	0	0		1	0	0	0	0	0	0	0	0	0	0	0	0
2	2014-10-31 12:33:30	2014-10-31 15:47:51	2014-10-31	358000000000000	Francis	Chakhaza	Vg31	11	3	5	2	18	1	4	3	5		4	2	1	7	3	0	0	0	0	0		1	0	0	0	0	0	0	0	0	0	0	0	0
2	2014-10-31 12:33:53	2014-10-31 15:29:38	2014-10-31	356000000000000	Maureen	Chakhaza	Vg28	29	2	3	2	84	1	1	2	1		0	0	2	2	3	0	0	0	0	0		1	0	0	0	0	0	0	0	0	0	0	1	0		media\1414751917308.jpg
2	2014-10-31 12:36:53	2014-10-31 16:51:10	2014-10-31	360000000000000	Saukila	Chakhaza	Vg33	29	2	3	2	38	1	1	2	3		4	1	1	6	3	0	0	0	0	0		1	0	0	0	0	0	0	0	0	0	0	0	0
2	2014-10-31 12:40:54	2014-10-31 16:09:56	2014-10-31	360000000000000	Patrick	Chakhaza	Vg36	33	2	3	2	37	1	1	2	1		3	2	0	5	3	0	0	1	0	0		1	0	0	0	0	0	0	0	0	0	0	0	0
2	2014-10-31 12:46:36	2014-10-31 15:49:49	2014-10-31	358000000000000	Francis	Chakhaza	Vg31	6	2	3	2	25	1	1	2	1		3	1	1	5	3	0	0	0	0	0		1	0	0	0	0	0	0	0	0	0	0	0	0
2	2014-10-31 13:18:44	2014-10-31 16:12:17	2014-10-31	360000000000000	Patrick	Chakhaza	Vg36	34	2	1	1	52	1	1	2	1		1	2	2	5	3	0	0	1	0	0		1	0	0	0	0	0	0	0	0	0	0	0	0
2	2014-10-31 13:20:36	2014-11-03 18:37:37	2014-10-31	359000000000000	Alex	Chakhaza	Vg40	11	8	5	1	15	1	4	2	5		4	2	2	8	3	0	0	0	0	0		1	0	0	0	0	0	0	0	0	0	0	0	0
2	2014-10-31 13:24:34	2014-10-31 16:25:55	2014-10-31	356000000000000	Victoria	Chakhaza	Vg4	1	2	1	1	40	1	1	1	1		6	2	2	10	3	0	0	0	0	0		1	0	0	0	0	0	0	0	0	0	0	0	0
2	2014-10-31 13:28:58	2014-10-31 16:26:16	2014-10-31	356000000000000	Victoria	Chakhaza	Vg4	1	1	3	2	44	1	1	2	1		6	2	2	10	3	0	0	0	0	0		1	0	0	0	0	0	0	0	0	0	0	0	0
2	2014-10-31 13:35:04	2014-10-31 16:51:56	2014-10-31	360000000000000	Saukila	Chakhaza	Vg33	28	1	1	1	41	1	1	2	2		3	2	2	7	3	0	0	0	1	0		1	0	0	0	0	1	0	0	0	0	0	1	0		media\1414755878008.jpg
2	2014-10-31 13:39:42	2014-11-03 18:36:22	2014-10-31	359000000000000	Alex	Chakhaza	Vg40	16	1	1	2	42	1	3	2	2		3	2	1	6	3	0	0	0	0	0		1	0	0	0	1	0	0	0	0	0	0	1	0		media\1414756252099.jpg
2	2014-10-31 13:43:04	2014-10-31 16:28:19	2014-10-31	356000000000000	Victoria	Chakhaza	Vg4	3	1	3	2	21	1	1	2	1		1	2	0	3	3	0	0	0	0	0		1	0	0	0	0	0	0	0	0	0	0	0	0
2	2014-10-31 13:57:26	2014-11-03 18:35:14	2014-10-31	359000000000000	Alex	Chakhaza	Vg40	16	3	5	2	15	1	4	2	5		3	2	1	6	3	0	0	0	0	0		1	0	0	0	0	0	0	0	0	0	0	0	0
2	2014-10-31 13:59:42	2014-10-31 16:29:32	2014-10-31	356000000000000	Victoria	Chakhaza	Vg4	4	1	3	2	23	1	1	2	1		2	2	0	4	3	0	0	0	0	0		1	0	0	0	0	0	0	0	0	0	0	0	0
2	2014-10-31 14:00:43	2014-10-31 16:52:23	2014-10-31	360000000000000	Saukila	Chakhaza	Vg33	26	2	3	2	22	1	1	2	1		2	2	0	4	3	0	0	0	0	0		1	0	0	0	0	1	0	0	0	0	0	1	0		media\1414757174915.jpg
2	2014-10-31 14:07:06	2014-10-31 16:29:46	2014-10-31	356000000000000	Victoria	Chakhaza	Vg4	4	2	1	1	25	1	1	2	1		2	2	0	4	3	0	0	0	0	0		1	0	0	0	0	0	0	0	0	0	0	0	0
2	2014-10-31 14:09:27	2014-10-31 16:45:34	2014-10-31	360000000000000	Eddah	Chakhaza	Vg38	14	2	3	2	32	1	1	2	1		4	1	1	6	3	0	0	0	0	0		1	0	0	0	0	0	0	0	0	0	0	0	0
2	2014-10-31 14:25:40	2014-11-03 18:25:56	2014-10-31	359000000000000	Alex	Chakhaza	Vg40	6	1	3	2	48	1	1	2	1		1	3	2	6	3	0	0	1	0	0		1	0	0	0	1	0	0	0	0	0	0	1	0		media\1414758768213.jpg
2	2014-10-31 14:29:33	2014-10-31 16:53:04	2014-10-31	360000000000000	Saukila	Chakhaza	Vg33	28	4	5	1	18	1	4	2	5		2	3	2	7	3	0	0	0	0	0		1	0	0	0	0	0	0	0	0	0	0	0	0
2	2014-11-03 09:42:53	2014-11-03 17:16:09	2014-11-03	358000000000000	Charity	Chakhaza	Vg60	27	2	3	2	45	1	1	2	1		1	3	2	6	3	0	0	0	0	0		1	0	0	0	0	0	0	0	0	0	0	0	0
2	2014-11-03 09:53:02	2014-11-03 16:59:13	2014-11-03	358000000000000	Charity	Chakhaza	Vg60	27	1	1	1	51	1	1	2	1		1	3	2	6	3	0	0	0	0	0		1	0	0	0	0	0	0	0	0	0	0	0	0
2	2014-11-03 10:01:43	2014-11-05 15:03:59	2014-11-03	359000000000000	Gausi	Chakhaza	Vg67	10	2	5	1	20	1	4	2	1		2	3	1	6	3	0	0	0	0	0		1	0	0	0	0	0	0	0	0	0	0	0	0
2	2014-11-03 10:23:37	2014-11-05 15:04:32	2014-11-03	359000000000000	Gausi	Chakhaza	Vg67	21	1	1	1	41	1	1	2	1		3	4	1	8	3	0	0	0	0	0		1	0	0	0	0	0	0	0	0	0	0	0	0
2	2014-11-03 10:35:13	2014-11-03 17:01:04	2014-11-03	358000000000000	Charity	Chakhaza	Vg60	26	2	3	2	23	1	1	2	1		1	2	0	3	3	0	0	0	0	0		1	0	0	0	0	0	0	0	0	0	0	0	0
2	2014-11-03 10:42:02	2014-11-05 15:05:18	2014-11-03	359000000000000	Gausi	Chakhaza	Vg67	21	4	5	2	18	1	4	2	5		3	4	1	8	3	0	0	0	0	0		1	0	0	0	0	0	0	0	0	0	0	0	0
2	2014-11-03 10:47:35	2014-11-05 13:23:31	2014-11-03	359000000000000	Collins	Chakhaza	Vg56	9	1	1	2	42	1	1	2	2		2	1	2	5	3	0	0	0	0	0		1	0	0	0	0	0	0	0	0	0	0	0	0
2	2014-11-03 10:48:50	2014-11-05 15:05:44	2014-11-03	359000000000000	Gausi	Chakhaza	Vg67	21	5	5	1	15	1	4	2	1		3	4	1	8	3	0	0	0	0	0		1	0	0	0	0	0	0	0	0	0	0	0	0
2	2014-11-03 10:49:22	2014-11-03 22:56:54	2014-11-03	360000000000000	Eddah	Chakhaza	Vg38	9	1	1	1	49	1	1	2	1		3	3	2	8	3	0	0	0	0	0		1	0	0	0	0	0	0	0	0	0	0	0	0
2	2014-11-03 10:54:31	2014-11-03 23:30:33	2014-11-03	359000000000000	Alex	Chakhaza	Vg7	43	1	2	1	32	1	1	2	1		4	4	0	8	3	0	0	0	0	0		1	0	0	0	1	0	0	0	0	0	0	1	0		media\1415005436795.jpg
2	2014-11-03 10:54:49	2014-11-05 15:06:14	2014-11-03	359000000000000	Gausi	Chakhaza	Vg67	21	3	5	1	20	1	4	3	1		3	4	1	8	3	0	0	0	0	0		1	0	0	0	0	1	0	0	0	0	0	1	0		media\1415005213371.jpg
2	2014-11-03 10:55:57	2014-11-05 13:23:03	2014-11-03	359000000000000	Collins	Chakhaza	Vg56	9	2	5	1	17	1	4	2	5		2	1	2	5	3	0	0	0	0	0		1	0	0	0	0	0	0	0	0	0	0	0	0
2	2014-11-03 11:11:40	2014-11-03 23:33:37	2014-11-03	359000000000000	Alex	Chakhaza	Vg7	43	2	3	2	31	1	1	1	1		4	4	0	8	3	0	0	0	0	0		1	0	0	0	0	0	0	0	0	0	0	0	0
2	2014-11-03 11:22:19	2014-11-03 22:57:54	2014-11-03	360000000000000	Eddah	Chakhaza	Vg38	2	2	3	2	35	1	1	2	1		4	2	0	6	3	0	0	0	0	0		1	0	0	0	0	0	0	0	0	0	0	0	0
2	2014-11-03 11:27:56	2014-11-05 13:22:01	2014-11-03	359000000000000	Collins	Chakhaza	Vg56	8	1	3	2	63	1	1	2	1		0	0	2	2	3	0	0	0	0	0		1	0	0	0	0	0	0	0	0	0	0	0	0
2	2014-11-03 11:28:40	2014-11-03 17:20:17	2014-11-03	356000000000000	Maureen	Chakhaza	Vg6	15	1	1	2	39	1	2	1	1		0	1	0	1	3	0	0	0	0	0		1	0	0	0	0	0	0	0	0	0	0	0	0
2	2014-11-03 11:37:29	2014-11-05 13:21:21	2014-11-03	359000000000000	Collins	Chakhaza	Vg56	8	2	1	1	72	1	1	3	1		0	0	2	2	3	0	0	0	0	0		1	0	0	0	0	0	0	0	0	0	0	0	0
2	2014-11-03 11:41:00	2014-11-03 17:24:50	2014-11-03	356000000000000	Maureen	Chakhaza	Vg6	25	1	1	1	24	1	1	1	4		1	2	0	3	3	0	0	0	0	0		1	0	0	0	0	0	0	0	0	0	0	0	0
2	2014-11-03 11:43:00	2014-11-05 15:07:09	2014-11-03	359000000000000	Gausi	Chakhaza	Vg67	9	2	3	2	50	1	1	1	1		4	3	2	9	3	0	0	0	0	0		1	0	0	0	0	0	0	0	0	0	0	0	0
2	2014-11-03 11:46:19	2014-11-03 17:24:02	2014-11-03	356000000000000	Maureen	Chakhaza	Vg6	25	2	3	2	23	1	1	1	4		1	2	0	3	3	0	0	0	0	0		1	0	0	0	0	0	0	0	0	0	0	0	0
2	2014-11-03 11:47:30	2014-11-05 15:07:31	2014-11-03	359000000000000	Gausi	Chakhaza	Vg67	9	3	5	1	18	1	4	3	5		4	3	2	9	3	0	0	0	0	0		1	0	0	0	0	0	0	0	0	0	0	0	0
2	2014-11-03 11:51:29	2014-11-03 17:20:59	2014-11-03	360000000000000	Patrick	Chakhaza	Vg65	23	1	1	2	49	1	2	1	1		1	2	1	4	3	0	0	0	0	0		1	0	0	0	0	0	0	0	0	0	0	0	0
2	2014-11-03 11:55:59	2014-11-05 13:20:39	2014-11-03	359000000000000	Collins	Chakhaza	Vg56	30	1	3	2	19	1	1	2	1		1	2	0	3	3	0	0	0	0	0		1	0	0	0	0	0	0	0	0	0	0	0	0
2	2014-11-03 12:02:16	2014-11-05 13:19:56	2014-11-03	359000000000000	Collins	Chakhaza	Vg56	30	3	1	1	29	1	1	2	2		1	2	0	3	3	0	0	0	0	0		1	0	0	0	0	0	0	0	0	0	0	0	0
2	2014-11-03 12:02:36	2014-11-03 17:23:19	2014-11-03	360000000000000	Patrick	Chakhaza	Vg65	23	3	6	2	18	1	1	2	1		1	2	1	4	3	0	0	0	0	0		1	0	0	0	0	0	0	0	0	0	0	0	0
2	2014-11-03 12:12:52	2014-11-03 17:25:38	2014-11-03	360000000000000	Patrick	Chakhaza	Vg65	14	2	1	1	48	1	1	1	1		1	0	2	3	3	0	0	0	0	0		1	0	0	0	0	0	0	0	0	0	0	0	0
2	2014-11-03 12:13:38	2014-11-03 17:26:18	2014-11-03	356000000000000	Maureen	Chakhaza	Vg6	16	1	1	1	69	1	1	2	1		0	0	2	2	3	0	0	0	0	0		1	0	0	0	0	0	0	0	0	0	0	1	0		media\1415010015598.jpg
2	2014-11-03 12:21:21	2014-11-05 13:19:15	2014-11-03	359000000000000	Collins	Chakhaza	Vg56	25	1	1	2	63	1	1	1	1		1	2	2	5	3	0	0	0	0	0		1	0	0	0	0	0	0	0	0	0	0	0	0
2	2014-11-03 12:29:30	2014-11-03 17:07:49	2014-11-03	358000000000000	Charity	Chakhaza	Vg60	14	1	1	1	25	1	1	2	2		1	2	0	3	3	0	0	0	0	0		1	0	0	0	0	0	0	0	0	0	0	0	0
2	2014-11-03 12:30:57	2014-11-05 13:18:16	2014-11-03	359000000000000	Collins	Chakhaza	Vg56	25	5	1	1	61	1	1	3	1		1	2	2	5	3	0	0	0	1	0		1	0	0	0	0	0	0	0	0	0	0	0	0
2	2014-11-03 12:36:54	2014-11-03 17:29:20	2014-11-03	356000000000000	Maureen	Chakhaza	Vg6	8	2	5	1	23	1	4	3	1		1	2	1	4	3	0	0	0	0	0		1	0	0	0	0	0	0	0	0	0	0	0	0
2	2014-11-03 13:01:35	2014-11-03 17:32:46	2014-11-03	356000000000000	Maureen	Chakhaza	Vg6	7	2	3	2	25	1	1	2	1		3	2	0	5	3	0	0	0	0	0		1	0	0	0	0	0	0	0	0	0	0	0	0
2	2014-11-03 13:02:22	2014-11-05 13:17:12	2014-11-03	359000000000000	Collins	Chakhaza	Vg56	26	1	1	1	44	1	1	2	1		3	4	2	9	3	0	0	0	0	0		1	0	0	0	0	0	0	0	0	0	0	0	0
2	2014-11-03 13:06:58	2014-11-03 17:33:18	2014-11-03	356000000000000	Maureen	Chakhaza	Vg6	7	1	1	1	35	1	1	3	1		3	2	0	5	3	0	0	0	0	0		1	0	0	0	0	0	0	0	0	0	0	0	0
2	2014-11-03 13:07:51	2014-11-05 13:15:39	2014-11-03	359000000000000	Collins	Chakhaza	Vg56	26	2	3	2	43	1	1	2	1		3	4	2	9	3	0	0	0	0	0		1	0	0	0	0	0	0	0	0	0	0	0	0
2	2014-11-03 13:10:13	2014-11-05 15:10:48	2014-11-03	359000000000000	Gausi	Chakhaza	Vg67	24	1	3	2	30	1	1	2	1		5	2	0	7	3	0	1	0	0	0		1	0	0	0	0	1	0	0	0	0	0	1	0		media\1415013376390.jpg
2	2014-11-03 13:15:23	2014-11-03 23:41:28	2014-11-03	359000000000000	Alex	Chakhaza	Vg7	38	1	3	2	24	1	1	2	1		2	2	0	4	3	0	0	0	1	0		1	0	0	0	0	1	0	0	0	0	0	0	0		media\1415014280005.jpg
2	2014-11-03 13:15:38	2014-11-05 13:14:30	2014-11-03	359000000000000	Collins	Chakhaza	Vg56	26	6	5	2	16	1	4	2	5		3	4	2	9	3	0	0	0	0	0		1	0	0	0	0	0	0	0	0	0	0	0	0
2	2014-11-03 13:21:15	2014-11-05 13:13:46	2014-11-03	359000000000000	Collins	Chakhaza	Vg56	26	4	5	1	21	1	4	3	3		4	3	2	9	3	0	0	0	0	0		1	0	0	0	0	0	0	0	0	0	0	0	0
2	2014-11-03 13:23:53	2014-11-03 17:09:14	2014-11-03	358000000000000	Charity	Chakhaza	Vg60	10	1	1	1	38	1	1	2	2		1	4	0	5	3	0	0	0	0	0		1	0	0	0	0	0	0	0	0	0	0	0	0
2	2014-11-03 13:29:47	2014-11-03 17:10:47	2014-11-03	358000000000000	Charity	Chakhaza	Vg60	10	4	5	1	22	1	4	2	1		1	4	0	5	3	0	0	0	0	0		1	0	0	0	0	0	0	0	0	0	0	0	0
2	2014-11-03 13:32:21	2014-11-03 17:41:39	2014-11-03	360000000000000	Patrick	Chakhaza	Vg65	4	1	1	1	31	1	1	2	1		3	2	0	5	3	0	0	0	0	0		1	0	0	0	0	0	0	0	0	0	0	0	0
2	2014-11-03 13:35:05	2014-11-03 23:42:48	2014-11-03	359000000000000	Alex	Chakhaza	Vg7	38	4	1	1	34	1	1	3	1		2	2	0	4	3	0	0	0	0	0		1	0	0	0	0	0	0	0	0	0	0	0	0
2	2014-11-03 13:38:18	2014-11-03 17:33:55	2014-11-03	356000000000000	Maureen	Chakhaza	Vg6	1	1	1	2	25	1	2	2	3		4	1	0	5	4	0	0	0	0	0		1	0	0	0	0	0	0	0	0	0	0	1	0		media\1415014946931.jpg
2	2014-11-03 13:47:04	2014-11-03 17:43:03	2014-11-03	360000000000000	Patrick	Chakhaza	Vg65	4	2	3	2	28	1	1	3	1		3	2	0	5	3	0	0	0	0	0		1	0	0	0	0	0	0	0	0	0	0	0	0
2	2014-11-03 13:51:03	2014-11-05 15:09:14	2014-11-03	359000000000000	Gausi	Chakhaza	Vg67	15	4	5	1	15	1	4	2	5		0	2	2	4	3	0	0	0	0	0		1	0	0	0	0	0	0	0	0	0	0	0	0
2	2014-11-03 13:54:56	2014-11-05 15:09:31	2014-11-03	359000000000000	Gausi	Chakhaza	Vg67	15	2	3	2	64	1	1	1	1		0	2	2	4	3	0	0	0	0	0		1	0	0	0	0	0	0	0	0	0	0	0	0
2	2014-11-03 13:55:31	2014-11-03 17:46:23	2014-11-03	360000000000000	Patrick	Chakhaza	Vg65	18	2	1	1	40	1	1	2	1		4	2	1	7	3	0	0	0	0	0		1	0	0	0	0	0	0	0	0	0	0	0	0
2	2014-11-03 13:59:16	2014-11-05 15:10:13	2014-11-03	359000000000000	Gausi	Chakhaza	Vg67	15	1	1	1	72	1	1	1	1		0	2	2	4	3	0	0	0	0	0		1	0	0	0	0	0	0	0	0	0	0	0	0
2	2014-11-03 14:16:19	2014-11-03 17:48:11	2014-11-03	360000000000000	Patrick	Chakhaza	Vg65	1	1	1	1	68	1	1	2	1		3	3	2	8	3	0	0	0	0	0		1	0	0	0	0	0	0	0	0	0	0	0	0
2	2014-11-03 14:17:25	2014-11-03 17:13:54	2014-11-03	358000000000000	Charity	Chakhaza	Vg60	11	1	1	1	42	1	1	3	1		2	0	2	4	3	0	0	0	0	0		1	0	0	0	0	0	0	0	0	0	0	0	0
2	2014-11-03 14:26:01	2014-11-03 17:49:56	2014-11-03	360000000000000	Patrick	Chakhaza	Vg65	1	2	3	2	61	1	1	2	1		3	3	2	8	3	0	0	0	0	0		1	0	0	0	0	0	0	0	0	0	0	0	0
2	2014-11-03 14:27:29	2014-11-03 17:14:17	2014-11-03	358000000000000	Charity	Chakhaza	Vg60	11	2	3	2	40	1	1	2	1		2	0	2	4	3	0	0	0	0	0		1	0	0	0	0	0	0	0	0	0	0	0	0
2	2014-11-03 14:38:06	2014-11-03 17:35:58	2014-11-03	356000000000000	Maureen	Chakhaza	Vg6	8	3	5	1	18	1	4	2	1		1	2	1	4	3	0	0	0	0	0		1	0	0	0	0	0	0	0	0	0	0	0	0
2	2014-11-03 14:40:29	2014-11-03 23:48:27	2014-11-03	359000000000000	Alex	Chakhaza	Vg7	23	1	1	2	30	1	3	1	1		3	2	0	5	3	0	0	0	0	0		1	0	0	0	0	0	0	0	0	0	0	0	0
2	2014-11-03 14:58:32	2014-11-03 23:11:14	2014-11-03	360000000000000	Eddah	Chakhaza	Vg9	15	1	1	1	25	1	1	2	1		3	2	0	5	3	0	0	0	0	0		1	0	0	0	0	0	0	0	0	0	0	0	0
2	2014-11-03 15:03:16	2014-11-03 23:11:48	2014-11-03	360000000000000	Eddah	Chakhaza	Vg9	15	2	3	2	24	1	1	1	1		3	2	0	5	3	0	0	0	0	0		1	0	0	0	0	0	0	0	0	0	0	0	0
2	2014-11-03 15:22:04	2014-11-04 00:03:40	2014-11-03	359000000000000	Alex	Chakhaza	Vg7	8	3	1	1	25	1	1	3	1		1	2	0	3	3	0	0	0	0	0		1	0	0	0	0	0	0	0	0	0	0	0	0
2	2014-11-04 09:25:31	2014-11-04 17:26:21	2014-11-04	360000000000000	Patrick	Chakhaza	Vg23	9	2	3	2	39	1	1	1	1		4	3	1	8	3	0	0	0	0	0		1	0	0	0	0	0	0	0	0	0	0	0	0
2	2014-11-04 09:34:20	2014-11-04 18:03:12	2014-11-04	360000000000000	Eddah	Chakhaza	Vg9	25	1	1	2	77	1	3	1	1		0	0	1	1	3	0	0	0	0	0		1	0	0	0	0	0	0	0	0	0	0	0	0
2	2014-11-04 09:40:36	2014-11-05 13:12:46	2014-11-04	359000000000000	Collins	Chakhaza	Vg50	10	1	1	2	80	1	3	1	1		1	0	2	3	3	0	1	1	0	0		1	0	0	0	0	1	0	0	0	0	0	1	0		media\1415087285076.jpg
2	2014-11-04 09:52:04	2014-11-04 16:18:54	2014-11-04	358000000000000	Francis	Chakhaza	Vg54	31	2	3	2	38	1	1	2	2		1	4	1	6	3	0	0	0	0	0		1	0	0	0	0	0	0	0	0	0	0	1	0		media\1415088051406.jpg
2	2014-11-04 09:53:49	2014-11-05 15:11:29	2014-11-04	359000000000000	Gausi	Chakhaza	Vg67	18	1	3	2	54	1	1	2	1		0	0	3	3	3	0	0	0	0	0		1	0	0	0	0	0	0	0	0	0	0	0	0
2	2014-11-04 09:56:43	2014-11-04 15:45:03	2014-11-04	358000000000000	Charity	Chakhaza	Vg52	18	1	1	1	33	1	1	2	1		5	2	0	7	3	0	0	0	0	0		1	0	0	0	0	0	0	0	0	0	0	0	0
2	2014-11-04 10:03:30	2014-11-05 15:12:19	2014-11-04	359000000000000	Gausi	Chakhaza	Vg67	18	2	6	2	84	1	3	1	1		0	0	3	3	3	0	0	0	0	0		1	0	0	0	0	0	0	0	0	0	0	0	0
2	2014-11-04 10:04:31	2014-11-04 18:03:28	2014-11-04	360000000000000	Eddah	Chakhaza	Vg9	5	1	1	1	44	1	3	2	1		3	2	1	6	3	0	0	0	0	0		1	0	0	0	0	0	0	0	0	0	0	0	0
2	2014-11-04 10:05:05	2014-11-04 16:19:21	2014-11-04	358000000000000	Francis	Chakhaza	Vg54	31	3	5	1	15	1	4	2	5		1	4	1	6	3	0	0	0	0	0		1	0	0	0	0	0	0	0	0	0	0	0	0
2	2014-11-04 10:22:26	2014-11-04 17:27:55	2014-11-04	360000000000000	Patrick	Chakhaza	Vg23	3	1	3	2	32	1	1	2	1		2	3	0	5	3	0	0	0	0	0		1	0	0	0	0	0	0	0	0	0	0	0	0
2	2014-11-04 10:24:38	2014-11-05 13:10:56	2014-11-04	359000000000000	Collins	Chakhaza	Vg50	3	1	1	2	69	1	3	1	1		4	1	1	6	3	0	0	0	0	0		1	0	0	0	0	0	0	0	0	0	0	0	0
2	2014-11-04 10:29:01	2014-11-04 16:21:20	2014-11-04	358000000000000	Francis	Chakhaza	Vg54	28	1	1	1	78	1	1	2	1		0	1	2	3	3	0	0	0	0	0		1	0	0	0	0	0	0	0	0	0	0	0	0
2	2014-11-04 10:36:18	2014-11-04 16:21:36	2014-11-04	358000000000000	Francis	Chakhaza	Vg54	28	3	6	2	15	1	4	2	5		0	1	2	3	3	0	0	0	0	0		1	0	0	0	0	0	0	0	0	0	0	0	0
2	2014-11-04 10:38:06	2014-11-04 18:05:26	2014-11-04	360000000000000	Eddah	Chakhaza	Vg9	2	2	3	2	36	1	1	1	3		6	2	0	8	3	0	0	0	0	1	Felt like pneumatic	1	0	1	0	0	0	0	0	0	1	1	1	0		media\1415091193877.jpg	media\1415091299740.jpg	media\1415091249806.jpg
2	2014-11-04 10:39:36	2014-11-04 16:21:57	2014-11-04	358000000000000	Francis	Chakhaza	Vg54	28	2	3	2	59	1	1	2	1		0	1	2	3	3	0	0	0	0	0		1	0	0	0	0	0	0	0	0	0	0	0	0
2	2014-11-04 10:50:19	2014-11-05 13:09:36	2014-11-04	359000000000000	Collins	Chakhaza	Vg50	15	2	1	1	89	1	1	2	1		0	1	2	3	3	0	0	1	0	0		1	0	0	0	0	0	0	0	0	0	0	0	0
2	2014-11-04 10:51:13	2014-11-04 15:47:31	2014-11-04	358000000000000	Charity	Chakhaza	Vg52	12	1	1	1	30	1	1	2	1		3	2	0	5	3	0	0	0	0	0		1	0	0	0	0	0	0	0	0	0	0	0	0
2	2014-11-04 10:51:49	2014-11-04 17:47:06	2014-11-04	359000000000000	Alex	Chakhaza	Vg7	2	60	1	1	60	1	1	2	1		0	2	2	4	3	0	0	0	0	0		1	0	0	0	0	0	0	0	0	0	0	0	0
2	2014-11-04 10:59:15	2014-11-04 16:22:39	2014-11-04	358000000000000	Francis	Chakhaza	Vg54	16	1	3	2	35	1	1	2	2		2	4	0	6	3	0	0	0	0	0		1	0	0	0	0	0	0	0	0	0	0	1	0		media\1415091896939.jpg
2	2014-11-04 11:00:46	2014-11-04 15:49:34	2014-11-04	358000000000000	Charity	Chakhaza	Vg52	12	2	3	2	24	1	1	2	1		3	2	0	5	3	0	0	0	0	0		1	0	0	0	0	0	0	0	0	0	0	0	0
2	2014-11-04 11:01:03	2014-11-05 13:09:06	2014-11-04	359000000000000	Collins	Chakhaza	Vg50	15	1	3	2	82	1	1	2	1		0	1	2	3	3	0	0	0	0	0		1	0	0	0	0	0	0	0	0	0	0	0	0
2	2014-11-04 11:06:56	2014-11-05 15:26:21	2014-11-04	359000000000000	Gausi	Chakhaza	Vg67	23	2	3	2	45	1	1	1	1		2	0	2	4	3	0	0	0	0	0		1	0	0	0	0	0	0	0	0	0	0	0	0
2	2014-11-04 11:09:52	2014-11-05 13:08:05	2014-11-04	359000000000000	Collins	Chakhaza	Vg50	15	3	6	1	18	1	4	2	1		0	1	2	3	3	0	0	0	0	0		1	0	0	0	0	0	0	0	0	0	0	0	0
2	2014-11-04 11:20:40	2014-11-04 15:51:58	2014-11-04	358000000000000	Charity	Chakhaza	Vg52	22	1	1	1	24	1	1	3	3		1	2	0	3	3	0	0	0	0	0		1	0	0	0	0	0	0	0	0	0	0	0	0
2	2014-11-04 11:24:48	2014-11-05 15:14:16	2014-11-04	359000000000000	Gausi	Chakhaza	Vg67	24	2	1	1	36	1	1	2	1		5	2	0	7	3	0	0	0	0	0		1	0	0	0	0	0	0	0	0	0	0	0	0
2	2014-11-04 11:26:05	2014-11-05 13:07:40	2014-11-04	359000000000000	Collins	Chakhaza	Vg50	6	1	3	2	28	1	1	3	1		2	2	0	4	3	0	0	0	0	0		1	0	0	0	0	0	0	0	0	0	0	0	0
2	2014-11-04 11:28:15	2014-11-04 15:51:29	2014-11-04	358000000000000	Charity	Chakhaza	Vg52	22	2	3	2	22	1	1	2	1		1	2	0	3	3	0	0	0	0	0		1	0	0	0	0	0	0	0	0	0	0	0	0
2	2014-11-04 11:29:49	2014-11-04 16:24:27	2014-11-04	358000000000000	Francis	Chakhaza	Vg54	11	5	5	1	23	1	4	2	1		2	1	2	5	3	0	0	0	0	0		1	0	0	0	0	0	0	0	0	0	0	0	0
2	2014-11-04 11:33:57	2014-11-05 13:07:22	2014-11-04	359000000000000	Collins	Chakhaza	Vg50	6	2	1	1	30	1	1	3	4		2	2	0	4	3	0	0	0	0	0		1	0	0	0	0	0	0	0	0	0	0	0	0
2	2014-11-04 11:42:59	2014-11-05 13:06:50	2014-11-04	359000000000000	Collins	Chakhaza	Vg50	4	1	1	1	20	1	1	2	1		0	2	0	2	3	0	0	0	0	0		1	0	0	0	0	0	0	0	0	0	0	0	0
2	2014-11-04 11:46:03	2014-11-05 13:06:30	2014-11-04	359000000000000	Collins	Chakhaza	Vg50	4	2	3	2	19	1	1	3	1		0	2	0	2	3	0	0	0	0	0		1	0	0	0	0	0	0	0	0	0	0	0	0
2	2014-11-04 11:48:01	2014-11-04 15:52:58	2014-11-04	358000000000000	Charity	Chakhaza	Vg52	27	1	1	1	44	1	1	2	1		4	2	1	7	3	0	0	0	0	0		1	0	0	0	0	0	0	0	0	0	0	0	0
2	2014-11-04 11:52:47	2014-11-05 13:06:15	2014-11-04	359000000000000	Collins	Chakhaza	Vg50	3	2	5	2	25	1	2	2	1		4	1	1	6	3	0	0	0	0	0		1	0	0	0	0	0	0	0	0	0	0	0	0
2	2014-11-04 11:54:32	2014-11-04 16:25:28	2014-11-04	358000000000000	Francis	Chakhaza	Vg54	7	2	3	2	27	1	1	3	1		1	2	0	3	3	0	0	0	0	0		1	0	0	0	0	0	0	0	0	0	0	0	0
2	2014-11-04 11:59:16	2014-11-04 15:53:19	2014-11-04	358000000000000	Charity	Chakhaza	Vg52	27	2	3	2	37	1	1	2	1		4	2	1	7	3	0	0	0	0	0		1	0	0	0	0	0	0	0	0	0	0	0	0
2	2014-11-04 12:04:46	2014-11-05 13:05:59	2014-11-04	359000000000000	Collins	Chakhaza	Vg50	8	1	1	2	62	1	2	2	1		2	0	1	3	3	0	0	0	0	0		1	0	0	0	0	0	0	0	0	0	0	0	0
2	2014-11-04 12:10:08	2014-11-04 15:53:52	2014-11-04	358000000000000	Charity	Chakhaza	Vg52	29	2	3	2	32	1	1	2	1		3	3	0	6	3	0	0	0	0	0		1	0	0	0	0	0	0	0	0	0	0	0	0
2	2014-11-04 12:16:36	2014-11-04 17:31:04	2014-11-04	360000000000000	Patrick	Chakhaza	Vg48	2	1	1	1	81	1	3	1	1		0	0	1	1	3	0	0	0	0	0		1	0	0	0	0	0	0	0	0	0	0	0	0
2	2014-11-04 12:19:36	2014-11-04 16:26:14	2014-11-04	358000000000000	Francis	Chakhaza	Vg54	2	1	3	2	43	1	1	2	1		3	2	2	7	3	0	0	0	0	0		1	0	0	0	0	0	0	0	0	0	0	0	0
2	2014-11-04 12:25:04	2014-11-05 13:05:41	2014-11-04	359000000000000	Collins	Chakhaza	Vg50	17	1	1	2	43	1	1	2	1		3	0	1	4	3	0	0	0	0	0		1	0	0	0	0	0	0	0	0	0	0	0	0
2	2014-11-04 12:27:13	2014-11-04 16:26:50	2014-11-04	358000000000000	Francis	Chakhaza	Vg54	2	4	5	2	20	1	4	3	1		3	2	2	7	3	0	0	0	0	0		1	0	0	0	0	0	0	0	0	0	0	0	0
2	2014-11-04 12:33:11	2014-11-04 16:27:13	2014-11-04	358000000000000	Francis	Chakhaza	Vg54	2	2	1	1	45	1	1	2	1		3	2	2	7	3	0	0	0	0	0		1	0	0	0	0	0	0	0	0	0	0	0	0
2	2014-11-04 12:33:53	2014-11-04 15:54:40	2014-11-04	358000000000000	Charity	Chakhaza	Vg52	29	1	1	1	38	1	1	2	1		3	3	0	6	3	0	0	0	0	0		1	0	0	0	0	0	0	0	0	0	0	0	0
2	2014-11-04 12:36:10	2014-11-04 16:27:32	2014-11-04	358000000000000	Francis	Chakhaza	Vg54	2	3	5	1	25	1	4	2	1		3	2	2	7	3	0	0	0	0	0		1	0	0	0	0	0	0	0	0	0	0	0	0
2	2014-11-04 12:45:27	2014-11-05 15:14:39	2014-11-04	359000000000000	Gausi	Chakhaza	Vg21	15	2	3	2	36	1	1	2	2		3	3	0	6	3	0	0	0	0	0		1	0	0	0	0	0	0	0	0	0	0	0	0
2	2014-11-04 12:54:46	2014-11-04 16:27:58	2014-11-04	358000000000000	Francis	Chakhaza	Vg54	15	1	3	2	35	1	1	2	1		2	4	0	6	3	0	0	0	0	0		1	0	0	0	0	0	0	0	0	0	0	0	0
2	2014-11-04 13:01:39	2014-11-04 16:28:14	2014-11-04	358000000000000	Francis	Chakhaza	Vg54	15	2	1	1	39	1	1	2	1		2	4	0	6	3	0	0	0	0	0		1	0	0	0	0	0	0	0	0	0	0	0	0
2	2014-11-04 13:02:55	2014-11-05 13:05:12	2014-11-04	359000000000000	Collins	Chakhaza	Vg50	1	3	6	1	20	1	4	2	1		4	5	0	9	3	0	0	0	0	0		1	0	0	0	0	0	0	0	0	0	0	1	0		media\1415099360288.jpg
2	2014-11-04 13:05:06	2014-11-04 16:28:34	2014-11-04	358000000000000	Francis	Chakhaza	Vg54	15	4	5	1	15	1	4	2	5		2	4	0	6	3	0	1	0	0	0		1	0	0	0	0	0	0	0	0	0	0	1	0		media\1415099442954.jpg
2	2014-11-04 13:06:36	2014-11-04 17:33:12	2014-11-04	360000000000000	Patrick	Chakhaza	Vg48	7	1	1	1	43	1	1	2	1		4	2	3	9	3	0	0	0	0	0		1	0	0	0	0	0	0	0	0	0	0	0	0
2	2014-11-04 13:10:09	2014-11-05 13:04:31	2014-11-04	359000000000000	Collins	Chakhaza	Vg50	1	1	3	2	25	1	1	2	1		4	5	0	9	3	0	0	0	0	0		1	0	0	0	0	0	0	0	0	0	0	0	0
2	2014-11-04 13:10:13	2014-11-04 18:34:43	2014-11-04	360000000000000	Saukila	Chakhaza	Vg33	12	1	1	1	40	1	1	1	3		6	1	1	8	3	0	0	0	0	0		1	0	0	0	0	0	0	0	0	0	0	0	0
2	2014-11-04 13:17:13	2014-11-05 13:04:16	2014-11-04	359000000000000	Collins	Chakhaza	Vg50	1	6	5	1	16	1	4	2	5		4	5	0	9	3	0	0	0	0	0		1	0	0	0	0	0	0	0	0	0	0	0	0
2	2014-11-04 13:19:19	2014-11-04 18:34:59	2014-11-04	360000000000000	Saukila	Chakhaza	Vg33	12	2	3	2	32	1	1	3	1		6	1	1	8	3	0	0	0	0	1	Heart palpitations	1	0	0	0	0	0	0	0	0	0	0	0	0
2	2014-11-04 13:26:30	2014-11-04 17:33:53	2014-11-04	360000000000000	Patrick	Chakhaza	Vg48	7	3	5	2	20	1	4	3	1		4	2	3	9	3	0	0	0	0	0		1	0	0	0	0	0	0	0	0	0	0	0	0
2	2014-11-04 13:26:32	2014-11-04 16:29:22	2014-11-04	358000000000000	Francis	Chakhaza	Vg54	16	2	1	1	36	1	1	2	1		2	4	0	6	3	0	0	0	0	0		1	0	0	0	0	0	0	0	0	0	0	0	0
2	2014-11-04 13:30:05	2014-11-04 17:34:29	2014-11-04	360000000000000	Patrick	Chakhaza	Vg48	7	6	5	2	25	1	4	2	1		4	2	3	9	3	0	0	0	0	0		1	0	0	0	0	0	0	0	0	0	0	0	0
2	2014-11-04 13:40:54	2014-11-05 15:15:16	2014-11-04	359000000000000	Gausi	Chakhaza	Vg42	24	1	1	2	46	1	2	2	3		5	3	1	9	3	0	0	0	0	0		1	0	0	0	0	0	0	0	0	0	0	0	0
2	2014-11-04 13:41:50	2014-11-04 18:36:13	2014-11-04	360000000000000	Saukila	Chakhaza	Vg33	4	2	3	2	50	1	1	1	1		1	0	2	3	3	0	0	0	0	0		1	0	0	0	0	0	0	0	0	0	0	0	0
2	2014-11-04 13:46:58	2014-11-05 15:15:49	2014-11-04	359000000000000	Gausi	Chakhaza	Vg42	24	2	5	1	20	1	4	3	5		5	3	1	9	3	0	0	0	0	0		1	0	0	0	0	0	0	0	0	0	0	0	0
2	2014-11-04 13:54:10	2014-11-04 15:55:12	2014-11-04	358000000000000	Charity	Chakhaza	Vg52	1	2	3	2	65	1	1	2	1		0	0	2	2	3	0	0	0	0	0		1	0	0	0	0	0	0	0	0	0	0	0	0
2	2014-11-04 14:12:03	2014-11-04 18:36:47	2014-11-04	360000000000000	Saukila	Chakhaza	Vg33	29	1	1	1	42	1	1	2	1		4	1	1	6	3	0	0	0	0	0		1	0	0	0	0	1	0	0	0	0	0	1	0		media\1415103487287.jpg		media\1415103522661.jpg
2	2014-11-04 14:12:53	2014-11-04 18:08:41	2014-11-04	360000000000000	Eddah	Chakhaza	Vg44	10	2	3	2	28	1	1	1	1		2	2	0	4	3	0	0	0	0	0		1	0	0	0	0	0	0	0	0	0	0	0	0
2	2014-11-04 14:16:18	2014-11-04 17:20:59	2014-11-04	359000000000000	Alex	Chakhaza	Vg44	4	1	1	1	42	1	1	2	1		3	2	1	6	3	0	0	0	0	0		1	0	0	0	0	0	0	0	0	0	0	0	0
2	2014-11-04 14:19:15	2014-11-05 15:16:43	2014-11-04	359000000000000	Gausi	Chakhaza	Vg42	22	2	5	2	19	1	4	3	1		0	5	2	7	3	0	0	0	0	0		1	0	0	0	0	0	0	0	0	0	0	0	0
2	2014-11-04 14:37:48	2014-11-05 15:17:23	2014-11-04	359000000000000	Gausi	Chakhaza	Vg42	22	3	5	1	15	1	1	2	1		0	5	2	7	3	0	0	0	0	0		1	0	0	0	0	0	0	0	0	0	0	0	0
2	2014-11-04 14:40:06	2014-11-04 17:51:44	2014-11-04	359000000000000	Alex	Chakhaza	Vg44	4	6	3	2	36	1	1	1	1		3	2	1	6	3	0	0	0	0	0		1	0	0	0	0	0	0	0	0	0	0	0	0
2	2014-11-04 14:46:23	2014-11-04 18:37:24	2014-11-04	360000000000000	Saukila	Chakhaza	Vg33	7	1	1	2	37	1	3	1	3		5	2	0	7	3	0	0	0	0	0		1	0	0	0	0	0	0	0	0	0	0	0	0
2	2014-11-04 15:10:48	2014-11-04 18:10:26	2014-11-04	360000000000000	Eddah	Chakhaza	Vg44	26	1	1	1	22	1	4	3	5		0	2	0	2	3	0	0	0	0	0		1	0	0	0	0	0	0	0	0	0	0	0	0
2	2014-11-04 15:28:48	2014-11-04 17:56:48	2014-11-04	359000000000000	Alex	Chakhaza	Vg44	8	3	5	2	16	1	4	2	1		0	2	1	3	3	0	0	0	1	0		1	0	0	0	1	0	0	0	0	0	0	1	0		media\1415108125595.jpg
2	2014-11-04 15:59:01	2014-11-05 15:22:16	2014-11-04	359000000000000	Gausi	Chakhaza	Vg42	9	4	5	1	18	1	4	2	1		2	2	2	6	3	0	0	0	0	0		1	0	0	0	0	0	0	0	0	0	0	0	0
2	2014-11-04 16:03:16	2014-11-04 17:38:35	2014-11-04	360000000000000	Patrick	Chakhaza	Vg48	1	2	3	2	36	1	1	2	1		5	1	1	7	3	0	0	1	0	0		1	0	0	0	0	0	0	0	0	0	0	0	0
2	2014-11-05 09:15:07	2014-11-05 14:25:21	2014-11-05	359000000000000	Collins	Chakhaza	Vg17	24	8	5	1	18	1	4	2	1		4	4	0	8	3	0	0	0	0	0		1	0	0	0	0	0	0	0	0	0	0	1	0		media\1415171975168.jpg
2	2014-11-05 09:20:56	2014-11-05 14:03:47	2014-11-05	358000000000000	Charity	Chakhaza	Vg52	24	1	1	1	39	1	1	2	1		4	2	0	6	3	0	0	0	0	0		1	0	0	0	0	0	0	0	0	0	0	0	0
2	2014-11-05 09:32:36	2014-11-05 14:23:20	2014-11-05	360000000000000	Patrick	Chakhaza	Vg23	12	1	1	1	34	1	1	2	1		3	5	0	8	3	0	0	1	0	0		1	0	0	0	0	0	0	0	0	0	0	0	0
2	2014-11-05 09:32:43	2014-11-05 15:21:49	2014-11-05	359000000000000	Gausi	Chakhaza	Vg42	15	1	1	1	54	1	1	2	1		1	0	2	3	3	0	0	0	0	0		1	0	0	0	0	0	0	0	0	0	0	0	0
2	2014-11-05 09:33:49	2014-11-05 14:04:33	2014-11-05	358000000000000	Charity	Chakhaza	Vg52	24	2	3	2	28	1	1	2	1		4	2	0	6	3	0	0	0	0	0		1	0	0	0	0	0	0	0	0	0	0	0	0
2	2014-11-05 09:42:38	2014-11-05 15:22:52	2014-11-05	359000000000000	Gausi	Chakhaza	Vg42	15	2	3	2	42	1	1	2	1		1	0	2	3	3	0	0	0	0	0		1	0	0	0	0	0	0	0	0	0	0	0	0
2	2014-11-05 09:45:59	2014-11-05 14:14:37	2014-11-05	358000000000000	Francis	Chakhaza	Vg54	25	1	1	1	34	1	1	2	1		2	5	0	7	3	0	0	0	0	0		1	0	0	0	0	0	0	0	0	0	0	0	0
2	2014-11-05 09:48:28	2014-11-05 14:54:40	2014-11-05	360000000000000	Eddah	Chakhaza	Vg42	13	2	3	2	20	1	1	3	1		1	2	0	3	3	0	0	1	0	0		1	0	0	0	0	0	0	0	0	0	0	0	0
2	2014-11-05 09:58:07	2014-11-05 14:26:15	2014-11-05	360000000000000	Patrick	Chakhaza	Vg23	12	4	6	2	39	1	2	1	1		3	5	0	8	3	0	0	0	0	0		1	0	0	0	0	0	0	0	0	0	0	0	0
2	2014-11-05 10:08:19	2014-11-05 13:56:00	2014-11-05	356000000000000	Maureen	Chakhaza	Vg40	8	6	5	1	16	1	4	2	5		1	4	2	7	3	0	0	0	0	0		1	0	0	0	0	0	0	0	0	0	0	0	0
2	2014-11-05 10:12:06	2014-11-05 14:37:17	2014-11-05	359000000000000	Alex	Chakhaza	Vg44	22	2	1	1	45	1	1	2	1		1	3	2	6	3	0	0	0	0	0		1	0	0	0	1	0	0	0	0	0	0	1	0		media\1415175614755.jpg		media\1415175652678.jpg
2	2014-11-05 10:14:46	2014-11-05 15:23:20	2014-11-05	359000000000000	Gausi	Chakhaza	Vg42	25	1	1	1	33	1	1	3	1		2	2	0	4	3	0	0	0	0	0		1	0	0	0	0	1	0	0	0	0	0	1	0		media\1415175623727.jpg
2	2014-11-05 10:20:54	2014-11-05 15:24:35	2014-11-05	359000000000000	Gausi	Chakhaza	Vg42	25	2	3	2	20	1	1	2	1		2	2	0	4	3	0	0	0	0	0		1	0	0	0	0	0	0	0	0	0	0	0	0
2	2014-11-05 10:41:40	2014-11-05 15:25:13	2014-11-05	359000000000000	Gausi	Chakhaza	Vg42	19	1	1	2	46	1	3	2	1		1	3	1	5	3	0	0	0	0	0		1	0	0	0	0	0	0	0	0	0	0	0	0
2	2014-11-05 10:42:51	2014-11-05 14:55:20	2014-11-05	360000000000000	Eddah	Chakhaza	Vg42	2	2	1	2	65	1	3	2	1		0	0	2	2	3	0	0	0	0	0		1	0	0	0	0	0	0	0	0	0	0	0	0
2	2014-11-05 11:04:52	2014-11-05 13:33:27	2014-11-05	360000000000000	Saukila	Chakhaza	Vg33	26	1	1	1	37	1	1	3	1		2	2	0	4	3	0	0	0	0	0		1	0	0	0	0	0	0	0	0	0	0	1	0		media\1415178724357.jpg
2	2014-11-05 11:06:31	2014-11-05 14:56:04	2014-11-05	360000000000000	Eddah	Chakhaza	Vg42	13	1	1	1	25	1	1	3	2		1	2	0	3	3	0	0	1	0	0		1	0	0	0	0	0	0	0	0	0	0	0	0
2	2014-11-05 11:24:18	2014-11-05 13:33:58	2014-11-05	360000000000000	Saukila	Chakhaza	Vg33	13	7	5	2	23	1	4	3	3		3	5	2	10	3	0	0	0	0	0		1	0	0	0	0	0	0	0	0	0	0	0	0
2	2014-11-05 11:31:20	2014-11-05 13:34:18	2014-11-05	360000000000000	Saukila	Chakhaza	Vg33	13	6	1	1	72	1	1	2	1		3	5	2	10	3	0	0	0	0	0		1	0	0	0	0	0	0	0	0	0	0	0	0
2	2014-11-05 12:15:46	2014-11-05 14:16:26	2014-11-05	358000000000000	Francis	Chakhaza	Vg31	24	3	5	1	20	1	4	3	5		2	3	2	7	3	0	0	0	0	0		1	0	0	0	0	0	0	0	0	0	0	0	0
2	2014-11-05 12:21:12	2014-11-05 14:01:46	2014-11-05	356000000000000	Maureen	Chakhaza	Vg28	26	1	1	1	52	1	1	2	1		3	0	2	5	3	0	0	0	0	0		1	0	0	0	0	0	0	0	0	0	0	0	0
2	2014-11-05 12:40:35	2014-11-05 14:29:02	2014-11-05	360000000000000	Patrick	Chakhaza	Vg48	29	1	3	2	30	1	1	1	1		6	4	1	11	3	0	0	0	0	0		1	0	0	0	0	0	0	0	0	0	0	1	0		media\1415184369895.jpg
2	2014-11-05 12:50:24	2014-11-05 14:29:24	2014-11-05	360000000000000	Patrick	Chakhaza	Vg48	29	11	5	2	25	1	2	2	1		6	4	1	11	3	0	0	0	0	0		1	0	0	0	0	0	0	0	0	0	0	0	0
2	2014-11-05 12:51:15	2014-11-05 14:18:43	2014-11-05	358000000000000	Francis	Chakhaza	Vg31	1	1	1	1	53	1	1	2	2		1	2	2	5	3	0	0	0	0	0		1	0	0	0	0	0	0	0	0	0	0	0	0
2	2014-11-05 13:08:23	2014-11-05 14:30:22	2014-11-05	360000000000000	Patrick	Chakhaza	Vg48	26	2	1	1	28	1	1	3	1		2	2	0	4	3	0	0	0	0	0		1	0	0	0	0	0	0	0	0	0	0	0	0
2	2014-11-05 13:22:24	2014-11-05 14:56:54	2014-11-05	360000000000000	Eddah	Chakhaza	Vg9	2	1	1	1	36	1	1	2	1		6	2	0	8	3	0	0	0	0	0		1	0	0	0	0	0	0	0	0	0	0	0	0
2	2014-11-05 13:32:21	2014-11-05 14:38:26	2014-11-05	359000000000000	Alex	Chakhaza	Vg44	15	3	5	2	28	1	1	3	1		1	3	2	6	3	0	0	0	0	0		1	0	0	0	1	0	0	0	0	0	0	1	0		media\1415188053345.jpg
2	2014-11-05 13:49:58	2014-11-05 14:32:11	2014-11-05	360000000000000	Patrick	Chakhaza	Vg48	29	8	5	1	17	1	4	2	1		6	4	1	11	3	0	1	1	1	0		1	0	0	0	0	0	0	0	0	0	0	0	0
2	2015-02-23 12:13:10	2015-03-05 16:13:41	2015-02-23	359000000000000	Collins	Mvera mission	Vg12	2	1	3	2	25	1	1	1	1		3	2	0	5	3	0	0	0	0	0		1	0	0	0	0	0	0	0	0	0	0	0	0
2	2015-02-23 12:23:39	2015-02-23 18:00:32	2015-02-23	359000000000000	Collins	Mvera mission	Vg12	2	2	1	1	35	1	1	2	2		3	2	0	5	3	0	1	0	0	0		1	0	0	0	0	0	0	0	0	0	0	0	0
2	2015-02-23 12:23:56	2015-02-25 16:12:24	2015-02-23	359000000000000	Gausi	Chankhungu	Vg55	22	1	1	2	73	1	2	2	1		0	2	1	3	3	0	0	0	0	0		1	0	0	0	0	0	0	0	0	0	0	0	0
2	2015-02-23 12:25:08	2015-02-23 17:54:16	2015-02-23	359000000000000	Valens	Mvera mission	Vg12	21	4	5	2	20	1	4	3	2		0	1	2	3	3	0	0	0	0	0		1	0	0	0	0	0	0	0	0	0	0	0	0
2	2015-02-23 12:39:55	2015-02-24 08:57:19	2015-02-23	359000000000000	Collins	Mvera mission	Vg12	1	1	3	2	70	1	1	2	1		3	0	2	5	3	0	0	0	0	0		1	0	0	0	0	0	0	0	0	0	0	0	0
2	2015-02-23 12:42:41	2015-02-23 17:48:32	2015-02-23	356000000000000	Halima	Mvera mission	Vg10	2	2	3	2	54	1	1	2	1		1	4	2	7	3	0	0	0	0	0		1	0	0	0	0	0	0	0	0	0	0	0	0
2	2015-02-23 12:48:12	2015-02-23 18:18:45	2015-02-23	360000000000000	Eddah	Chankhungu	Vg59	40	1	1	1	31	1	1	3	4		2	2	0	4	3	0	0	0	0	0		1	0	0	0	0	0	0	0	0	0	0	0	0
2	2015-02-23 12:51:32	2015-02-23 18:33:36	2015-02-23	359000000000000	Gausi	Chankhungu	Vg55	16	2	3	2	28	1	1	1	1		2	2	0	4	3	0	0	0	0	0		1	0	0	0	0	0	0	0	0	0	0	0	0
2	2015-02-23 12:55:10	2015-02-23 18:02:23	2015-02-23	359000000000000	Collins	Mvera mission	Vg12	10	1	3	2	18	1	1	2	2		0	2	0	2	3	0	0	0	0	0		1	0	0	0	0	0	0	0	0	0	0	0	0
2	2015-02-23 13:00:12	2015-02-23 19:17:35	2015-02-23	360000000000000	Patrick	Chankhungu	Vg69	1	2	3	2	30	1	1	2	1		0	2	0	2	3	0	1	1	0	0		1	0	0	0	0	0	0	0	0	0	0	1	0		media\1424689480466.jpg
2	2015-02-23 13:02:27	2015-02-23 18:09:03	2015-02-23	356000000000000	Maureen	Mvera mission	Vg10	18	3	1	2	20	1	2	3	3		1	1	2	4	3	0	0	0	0	0		1	0	0	0	0	0	0	0	0	0	0	0	0
2	2015-02-23 13:04:54	2015-02-23 18:22:17	2015-02-23	359000000000000	Alex	Mvera mission	Vg2	28	1	1	1	55	1	1	2	1		0	1	2	3	3	0	0	0	0	0		1	0	0	0	0	0	0	0	0	0	0	0	0
2	2015-02-23 13:08:07	2015-02-23 18:20:03	2015-02-23	360000000000000	Eddah	Chankhungu	Vg59	21	1	1	2	72	1	3	2	1		1	1	1	3	3	0	0	1	0	1	Chest pains and Pneumonia	1	0	0	0	0	0	0	0	0	0	0	0	0
2	2015-02-23 13:13:24	2015-02-23 18:22:30	2015-02-23	359000000000000	Alex	Mvera mission	Vg2	28	3	5	1	25	1	4	2	1		0	1	2	3	3	0	0	0	0	0		1	0	0	0	0	0	0	0	0	0	0	0	0
2	2015-02-23 13:15:31	2015-02-23 18:22:48	2015-02-23	359000000000000	Alex	Mvera mission	Vg2	28	2	3	2	52	1	1	2	1		0	1	2	3	3	0	0	0	0	0		1	0	0	0	0	0	0	0	0	0	0	0	0
2	2015-02-23 13:25:01	2015-02-23 17:48:56	2015-02-23	356000000000000	Halima	Mvera mission	Vg10	2	1	1	1	58	1	1	3	1		1	4	2	7	3	0	0	0	0	0		1	0	0	0	0	0	0	0	0	0	0	0	0
2	2015-02-23 13:30:22	2015-02-23 18:10:22	2015-02-23	356000000000000	Maureen	Mvera mission	Vg10	36	2	3	2	28	1	1	2	1		2	2	0	4	3	0	0	0	0	0		1	0	0	0	0	0	0	0	0	0	0	0	0
2	2015-02-23 13:38:27	2015-02-23 17:49:30	2015-02-23	356000000000000	Halima	Mvera mission	Vg10	2	5	6	2	18	1	4	3	5		1	4	2	7	3	0	0	0	0	0		1	0	0	0	0	0	0	0	0	0	0	0	0
2	2015-02-23 13:41:06	2015-02-23 18:22:17	2015-02-23	360000000000000	Eddah	Chankhungu	Vg59	23	3	3	2	26	1	1	2	2		3	3	0	6	3	0	0	0	0	0		1	0	0	0	0	0	0	0	0	0	0	0	0
2	2015-02-23 13:42:25	2015-02-23 19:18:48	2015-02-23	360000000000000	Patrick	Chankhungu	Vg69	13	1	1	1	45	1	1	2	1		1	3	2	6	3	0	0	0	0	0		1	0	0	0	0	0	0	0	0	0	0	0	0
2	2015-02-23 13:46:38	2015-02-23 19:19:23	2015-02-23	360000000000000	Patrick	Chankhungu	Vg69	13	2	3	2	42	1	1	1	1		1	3	2	6	3	0	0	0	0	0		1	0	0	0	0	0	0	0	0	0	0	0	0
2	2015-02-23 13:46:39	2015-02-23 18:10:49	2015-02-23	356000000000000	Maureen	Mvera mission	Vg10	26	2	3	2	40	1	1	2	2		4	2	2	8	3	0	0	0	0	0		1	0	0	0	0	0	0	0	0	0	0	0	0
2	2015-02-23 13:47:52	2015-02-23 18:23:21	2015-02-23	360000000000000	Eddah	Chankhungu	Vg59	23	2	3	2	26	1	1	1	1		3	3	0	6	3	0	0	0	0	0		1	0	0	0	0	0	0	0	0	0	0	0	0
2	2015-02-23 13:49:17	2015-02-23 19:19:59	2015-02-23	360000000000000	Patrick	Chankhungu	Vg69	13	3	5	1	21	1	4	3	1		1	3	2	6	3	0	0	0	0	0		1	0	0	0	0	0	0	0	0	0	0	0	0
2	2015-02-23 13:53:18	2015-02-23 19:20:22	2015-02-23	360000000000000	Patrick	Chankhungu	Vg69	13	4	5	2	19	1	4	3	1		1	3	2	6	3	0	0	0	0	0		1	0	0	0	0	0	0	0	0	0	0	0	0
2	2015-02-23 14:01:15	2015-02-23 18:12:28	2015-02-23	356000000000000	Maureen	Mvera mission	Vg10	26	1	1	1	50	1	1	2	2		4	2	2	8	3	0	0	0	0	0		1	0	0	0	0	0	0	0	0	0	0	0	0
2	2015-02-23 14:03:59	2015-02-23 18:12:45	2015-02-23	356000000000000	Maureen	Mvera mission	Vg10	26	4	5	1	17	1	4	2	5		4	2	2	8	3	0	0	0	0	0		1	0	0	0	0	0	0	0	0	0	0	0	0
2	2015-02-23 14:04:29	2015-02-23 18:03:20	2015-02-23	359000000000000	Collins	Mvera mission	Vg12	12	1	5	2	19	1	1	2	1		4	3	1	8	3	0	0	0	0	0		1	0	0	0	0	0	0	0	0	0	0	0	0
2	2015-02-23 14:06:41	2015-02-23 17:57:04	2015-02-23	359000000000000	Valens	Mvera mission	Vg12	25	1	1	1	30	1	1	2	1		1	2	0	3	3	0	0	0	0	0		1	0	0	0	0	0	0	0	0	0	0	0	0
2	2015-02-23 14:11:59	2015-02-23 17:57:20	2015-02-23	359000000000000	Valens	Mvera mission	Vg12	25	2	3	2	23	1	1	2	2		1	2	0	3	3	0	0	0	0	0		1	0	0	0	0	0	0	0	0	0	0	0	0
2	2015-02-23 14:22:42	2015-02-23 17:50:10	2015-02-23	356000000000000	Halima	Mvera mission	Vg10	7	1	3	2	33	1	1	2	2		4	2	1	7	3	0	1	1	0	1	Chest pain and heart palpitation	1	0	0	0	0	0	0	0	0	0	0	0	0
2	2015-02-23 15:11:33	2015-02-23 19:22:39	2015-02-23	360000000000000	Patrick	Chankhungu	Vg69	39	2	3	2	38	1	1	1	1		4	3	1	8	3	0	0	0	0	0		1	0	0	0	0	0	0	0	0	0	0	0	0
2	2015-02-23 15:41:32	2015-02-23 19:24:17	2015-02-23	360000000000000	Patrick	Chankhungu	Vg69	58	2	3	2	58	1	1	1	1		0	0	2	2	3	0	0	0	0	0		1	0	0	0	0	0	0	0	0	0	0	0	0
2	2015-02-24 10:54:18	2015-02-24 19:03:29	2015-02-24	360000000000000	Eddah	Chankhungu	Vg9	18	2	3	2	18	1	1	2	1		0	2	0	2	3	0	0	0	0	0		1	0	0	0	0	0	0	0	0	0	0	0	0
2	2015-02-24 10:54:33	2015-02-24 18:56:58	2015-02-24	359000000000000	Alex	Mvera mission	Vg43	17	2	3	2	33	1	1	3	1		2	2	0	4	3	0	0	0	0	0		1	0	0	0	0	0	0	0	0	0	0	0	0
2	2015-02-24 10:57:06	2015-02-24 19:03:50	2015-02-24	360000000000000	Eddah	Chankhungu	Vg9	18	1	1	1	22	1	1	1	1		0	2	0	2	3	0	0	0	0	0		1	0	0	0	0	0	0	0	0	0	0	0	0
2	2015-02-24 11:02:24	2015-02-24 18:35:05	2015-02-24	360000000000000	Patrick	Chankhungu	Vg9	7	2	3	2	32	1	1	2	3		4	2	1	7	3	0	0	0	0	0		1	0	0	0	0	0	0	0	0	0	0	0	0
2	2015-02-24 11:05:04	2015-02-24 18:35:25	2015-02-24	360000000000000	Patrick	Chankhungu	Vg9	7	3	5	2	15	1	4	2	3		4	2	1	7	3	0	0	0	0	0		1	0	0	0	0	0	0	0	0	0	0	0	0
2	2015-02-24 11:15:42	2015-02-24 18:57:39	2015-02-24	359000000000000	Alex	Mvera mission	Vg43	11	1	5	2	17	1	4	3	5		1	2	1	4	3	0	0	0	0	0		1	0	0	0	0	0	0	0	0	0	0	1	0		media\1424769968116.jpg
2	2015-02-24 11:17:05	2015-02-24 18:22:49	2015-02-24	359000000000000	Gausi	Chankhungu	Vg76	37	1	1	1	24	1	1	1	1		0	2	0	2	3	0	0	0	0	0		1	0	0	0	0	0	0	0	0	0	0	0	0
2	2015-02-24 11:17:15	2015-02-24 17:13:06	2015-02-24	359000000000000	Phonex	Mvera mission	Vg41	16	1	1	1	35	1	1	2	1		3	2	0	5	3	0	0	0	0	0		1	0	0	0	0	0	0	0	0	0	0	0	0
2	2015-02-24 11:20:28	2015-02-24 19:05:17	2015-02-24	360000000000000	Eddah	Chankhungu	Vg9	5	1	1	1	41	1	1	1	1		5	2	1	8	3	0	0	0	0	0		1	0	0	0	0	0	0	0	0	0	0	0	0
2	2015-02-24 11:22:16	2015-02-24 18:36:35	2015-02-24	360000000000000	Patrick	Chankhungu	Vg9	11	3	5	2	15	1	4	2	1		4	2	1	7	3	0	0	0	0	0		1	0	0	0	0	0	0	0	0	0	0	0	0
2	2015-02-24 11:22:55	2015-02-24 18:13:17	2015-02-24	352000000000000	Helecks	Mvera mission	Vg60	4	1	3	2	18	1	1	2	1		0	2	0	2	3	0	0	0	0	0		1	0	0	0	0	0	0	0	0	0	0	0	0
2	2015-02-24 11:25:26	2015-02-24 17:13:19	2015-02-24	359000000000000	Phonex	Mvera mission	Vg41	16	2	3	2	30	1	1	2	1		3	2	0	5	3	0	0	0	0	0		1	0	0	0	0	0	0	0	0	0	0	0	0
2	2015-02-24 11:26:51	2015-02-24 18:13:37	2015-02-24	352000000000000	Helecks	Mvera mission	Vg60	4	2	1	1	20	1	1	2	1		0	2	0	2	3	0	0	0	0	0		1	0	0	0	0	0	0	0	0	0	0	0	0
2	2015-02-24 11:26:55	2015-02-24 18:36:55	2015-02-24	360000000000000	Patrick	Chankhungu	Vg9	11	2	3	2	36	1	1	2	1		4	2	1	7	3	0	0	0	0	0		1	0	0	0	0	0	0	0	0	0	0	0	0
2	2015-02-24 11:29:54	2015-02-24 18:37:20	2015-02-24	360000000000000	Patrick	Chankhungu	Vg9	11	1	1	1	40	1	1	2	1		4	2	1	7	3	0	0	0	0	0		1	0	0	0	0	0	0	0	0	0	0	0	0
2	2015-02-24 11:30:33	2015-02-24 19:06:00	2015-02-24	360000000000000	Eddah	Chankhungu	Vg9	5	2	3	2	39	1	1	2	1		5	2	1	8	3	0	0	0	0	0		1	0	0	0	0	0	0	0	0	0	0	0	0
2	2015-02-24 11:36:56	2015-02-24 18:23:27	2015-02-24	359000000000000	Gausi	Chankhungu	Vg76	37	2	3	2	19	1	1	2	1		0	2	0	2	3	0	0	0	0	0		1	0	0	0	0	0	0	0	0	0	0	0	0
2	2015-02-24 11:58:13	2015-02-24 19:07:12	2015-02-24	360000000000000	Eddah	Chankhungu	Vg9	1	1	1	1	47	1	2	1	1		4	2	1	7	3	0	0	0	0	0		1	0	0	0	0	0	0	0	0	0	0	0	0
2	2015-02-24 11:59:32	2015-02-24 18:38:44	2015-02-24	360000000000000	Patrick	Chankhungu	Vg9	12	2	3	2	35	1	1	2	1		3	3	1	7	3	0	0	0	0	0		1	0	0	0	0	0	0	0	0	0	0	0	0
2	2015-02-24 12:01:58	2015-02-24 18:10:14	2015-02-24	359000000000000	Collins	Mvera mission	Vg59	5	2	1	1	73	1	1	2	1		0	0	2	2	3	0	0	0	0	0		1	0	0	0	0	0	0	0	0	0	0	0	0
2	2015-02-24 12:05:27	2015-02-24 19:07:43	2015-02-24	360000000000000	Eddah	Chankhungu	Vg9	1	2	5	2	26	1	2	2	2		4	2	1	7	3	0	0	0	0	0		1	0	0	0	0	0	0	0	0	0	0	0	0
2	2015-02-24 12:06:56	2015-02-24 18:10:36	2015-02-24	359000000000000	Collins	Mvera mission	Vg59	5	1	3	2	63	1	1	2	1		0	0	2	2	3	0	0	0	0	0		1	0	0	0	0	0	0	0	0	0	0	0	0
2	2015-02-24 12:13:46	2015-02-24 17:43:57	2015-02-24	359000000000000	Valens	Chankhungu	Vg14	14	1	3	2	49	1	1	1	1		2	2	2	6	3	0	0	0	0	0		1	0	0	0	0	0	0	0	0	0	0	0	0
2	2015-02-24 12:14:28	2015-02-24 18:24:44	2015-02-24	359000000000000	Gausi	Chankhungu	Vg76	6	1	1	2	47	1	2	1	1		0	1	1	2	3	0	0	0	0	0		1	0	0	0	0	0	0	0	0	0	0	0	0
2	2015-02-24 12:14:39	2015-02-24 19:08:19	2015-02-24	360000000000000	Eddah	Chankhungu	Vg9	1	3	5	2	17	1	4	2	1		4	2	1	7	3	0	0	0	0	0		1	0	0	0	0	0	0	0	0	0	0	0	0
2	2015-02-24 12:19:47	2015-02-24 19:06:26	2015-02-24	360000000000000	Saukila	Chankhungu	Vg72	33	2	3	2	34	1	1	2	1		4	2	0	6	3	0	0	0	0	0		1	0	0	0	0	0	0	0	0	0	0	0	0
2	2015-02-24 12:23:03	2015-02-24 19:06:51	2015-02-24	360000000000000	Saukila	Chankhungu	Vg72	33	1	1	1	37	1	1	2	1		4	2	0	6	3	0	0	0	0	0		1	0	0	0	0	0	0	0	0	0	0	0	0
2	2015-02-24 12:23:23	2015-02-24 18:14:50	2015-02-24	352000000000000	Helecks	Mvera mission	Vg60	3	1	3	2	24	1	1	2	1		2	2	0	4	3	0	0	0	0	0		1	0	0	0	0	0	0	0	0	0	0	0	0
2	2015-02-24 12:25:16	2015-02-24 17:13:59	2015-02-24	359000000000000	Phonex	Mvera mission	Vg41	10	1	1	1	79	1	1	2	1		2	1	2	5	3	0	0	0	0	0		1	0	0	0	0	0	0	0	0	0	0	0	0
2	2015-02-24 12:28:43	2015-02-24 18:15:08	2015-02-24	352000000000000	Helecks	Mvera mission	Vg60	3	2	1	2	36	1	1	3	1		2	2	0	4	3	0	0	0	0	0		1	0	0	0	0	0	0	0	0	0	0	0	0
2	2015-02-24 12:30:59	2015-02-24 18:26:00	2015-02-24	359000000000000	Gausi	Chankhungu	Vg76	1	1	1	2	70	1	3	1	1		0	0	1	1	3	0	0	0	0	0		1	0	0	0	0	0	0	0	0	0	0	0	0
2	2015-02-24 12:35:39	2015-02-24 19:08:03	2015-02-24	360000000000000	Saukila	Chankhungu	Vg72	28	1	1	1	27	1	1	1	1		1	2	0	3	3	0	0	0	0	0		1	0	0	0	0	0	0	0	0	0	0	0	0
2	2015-02-24 12:39:21	2015-02-24 17:45:43	2015-02-24	359000000000000	Valens	Chankhungu	Vg14	4	2	3	2	25	1	1	2	1		2	2	0	4	3	0	0	0	0	0		1	0	0	0	0	0	0	0	0	0	0	0	0
2	2015-02-24 12:41:12	2015-02-24 19:08:37	2015-02-24	360000000000000	Saukila	Chankhungu	Vg72	28	2	3	2	22	1	1	2	1		1	2	0	3	3	0	0	0	0	0		1	0	0	0	0	0	0	0	0	0	0	0	0
2	2015-02-24 12:43:15	2015-02-24 18:59:42	2015-02-24	359000000000000	Alex	Mvera mission	Vg43	21	1	3	2	31	1	1	3	1		2	1	1	4	3	0	0	0	0	0		1	0	0	0	0	0	0	0	0	0	0	1	0		media\1424774966617.jpg
2	2015-02-24 12:44:26	2015-02-24 19:09:22	2015-02-24	360000000000000	Eddah	Chankhungu	Vg9	12	1	1	1	32	1	1	1	1		2	2	1	5	3	0	0	0	0	0		1	0	0	0	0	0	0	0	0	0	0	0	0
2	2015-02-24 12:49:39	2015-02-24 19:00:01	2015-02-24	359000000000000	Alex	Mvera mission	Vg43	21	4	1	1	45	1	1	2	1		2	1	1	4	3	0	0	0	0	0		1	0	0	0	0	0	0	0	0	0	0	0	0
2	2015-02-24 12:51:14	2015-02-24 19:09:49	2015-02-24	360000000000000	Eddah	Chankhungu	Vg9	12	2	3	2	27	1	1	2	1		2	2	1	5	3	0	0	0	0	0		1	0	0	0	0	0	0	0	0	0	0	0	0
2	2015-02-24 12:54:35	2015-02-24 19:10:20	2015-02-24	360000000000000	Eddah	Chankhungu	Vg9	12	3	6	2	85	1	3	1	1		2	2	1	5	3	0	0	0	0	0		1	0	0	0	0	0	0	0	0	0	0	0	0
2	2015-02-24 12:57:52	2015-02-24 19:09:48	2015-02-24	360000000000000	Saukila	Chankhungu	Vg72	34	2	3	2	38	1	1	2	2		5	2	1	8	3	0	0	0	0	0		1	0	0	0	0	0	0	0	0	0	0	0	0
2	2015-02-24 13:02:41	2015-02-24 19:10:10	2015-02-24	360000000000000	Saukila	Chankhungu	Vg72	34	3	5	2	18	1	4	2	5		5	2	1	8	3	0	0	0	0	0		1	0	0	0	0	0	0	0	0	0	0	0	0
2	2015-02-24 13:04:42	2015-02-24 19:10:50	2015-02-24	360000000000000	Saukila	Chankhungu	Vg72	34	1	1	1	42	1	1	1	1		5	2	1	8	3	0	0	0	0	0		1	0	0	0	0	0	0	0	0	0	0	0	0
2	2015-02-24 13:11:26	2015-02-24 19:00:52	2015-02-24	359000000000000	Alex	Mvera mission	Vg43	19	2	3	2	37	1	1	2	1		4	2	0	6	3	0	0	0	0	0		1	0	0	0	0	0	0	0	0	0	0	0	0
2	2015-02-24 13:13:03	2015-02-24 17:14:55	2015-02-24	359000000000000	Phonex	Mvera mission	Vg41	23	1	1	2	70	1	3	2	1		2	2	2	6	3	0	0	0	0	0		1	0	0	0	0	0	0	0	0	0	0	0	0
2	2015-02-24 13:26:01	2015-02-24 19:11:09	2015-02-24	360000000000000	Eddah	Chankhungu	Vg19	20	2	3	2	23	1	1	2	1		2	2	0	4	3	0	0	0	0	0		1	0	0	0	0	0	0	0	0	0	0	0	0
2	2015-02-24 13:30:05	2015-02-24 19:11:35	2015-02-24	360000000000000	Eddah	Chankhungu	Vg19	20	1	1	1	29	1	1	2	2		2	2	0	4	3	0	0	0	0	0		1	0	0	0	0	0	0	0	0	0	0	0	0
2	2015-02-24 13:34:15	2015-02-24 19:01:25	2015-02-24	359000000000000	Alex	Mvera mission	Vg43	18	1	1	2	26	1	1	2	1		1	1	0	2	3	0	0	0	0	0		1	0	0	0	0	0	0	0	0	0	0	0	0
2	2015-02-24 13:39:54	2015-02-24 17:15:23	2015-02-24	359000000000000	Phonex	Mvera mission	Vg41	17	1	1	1	43	1	1	1	1		3	2	1	6	3	0	0	0	0	0		1	0	0	0	0	0	0	0	0	0	0	0	0
2	2015-02-24 13:52:58	2015-02-24 19:01:46	2015-02-24	359000000000000	Alex	Mvera mission	Vg43	11	4	1	1	49	1	3	3	4		1	2	1	4	3	0	0	0	0	0		1	0	0	0	0	0	0	0	0	0	0	1	0		media\1424779265312.jpg
2	2015-02-24 13:55:20	2015-02-24 17:16:23	2015-02-24	359000000000000	Phonex	Mvera mission	Vg41	10	4	5	2	15	1	4	2	5		1	2	2	5	3	0	0	0	0	0		1	0	0	0	0	0	0	0	0	0	0	0	0
2	2015-02-24 14:07:54	2015-02-24 17:48:30	2015-02-24	359000000000000	Valens	Chankhungu	Vg31	4	1	1	1	51	1	1	2	1		2	0	2	4	3	0	0	0	0	0		1	0	0	0	0	0	0	0	0	0	0	0	0
2	2015-02-24 14:09:55	2015-02-24 19:12:59	2015-02-24	360000000000000	Saukila	Chankhungu	Vg72	25	2	3	2	24	1	1	2	1		1	2	0	3	3	0	0	0	0	0		1	0	0	0	0	0	0	0	0	0	0	0	0
2	2015-02-24 14:10:50	2015-02-24 17:17:03	2015-02-24	359000000000000	Phonex	Mvera mission	Vg41	4	1	1	1	38	1	1	3	1		3	2	0	5	3	0	0	0	0	0		1	0	0	0	0	0	0	0	0	0	0	0	0
2	2015-02-24 14:14:24	2015-02-24 17:17:16	2015-02-24	359000000000000	Phonex	Mvera mission	Vg41	4	2	3	2	33	1	1	3	1		3	2	0	5	3	0	0	0	0	0		1	0	0	0	0	0	0	0	0	0	0	0	0
2	2015-02-24 14:16:05	2015-02-24 17:49:04	2015-02-24	359000000000000	Valens	Chankhungu	Vg31	4	2	3	2	50	1	1	1	1		0	2	2	4	3	0	0	0	0	0		1	0	0	0	0	0	0	0	0	0	0	1	0		media\1424780376534.jpg
2	2015-02-24 14:20:48	2015-02-24 17:49:32	2015-02-24	359000000000000	Valens	Chankhungu	Vg31	4	3	5	1	21	1	4	3	5		0	2	2	4	3	0	0	0	0	0		1	0	0	0	0	0	0	0	0	0	0	0	0
2	2015-02-24 14:21:17	2015-02-24 19:13:31	2015-02-24	360000000000000	Saukila	Chankhungu	Vg72	26	1	1	1	37	1	1	2	1		2	2	0	4	3	0	0	0	0	0		1	0	0	0	0	0	0	0	0	0	0	0	0
2	2015-02-24 14:30:46	2015-02-24 18:29:56	2015-02-24	359000000000000	Gausi	Chankhungu	Vg53	7	2	3	2	36	1	1	1	1		3	1	1	5	3	0	1	0	0	0		1	0	1	0	0	0	0	0	0	1	1	0	0		media\1424781334258.jpg	media\1424781375642.jpg
2	2015-02-24 14:35:47	2015-02-24 18:48:04	2015-02-24	360000000000000	Patrick	Chankhungu	Vg4	12	8	6	2	17	1	4	2	1		4	2	2	8	3	0	0	0	0	0		1	0	0	0	0	0	0	0	0	0	0	0	0
2	2015-02-24 14:41:28	2015-02-24 18:48:38	2015-02-24	360000000000000	Patrick	Chankhungu	Vg4	12	3	5	2	32	1	3	2	1		4	2	2	8	3	0	0	0	0	0		1	0	0	0	0	0	0	0	0	0	0	0	0
2	2015-02-24 14:46:07	2015-02-24 17:17:40	2015-02-24	359000000000000	Phonex	Mvera mission	Vg41	23	4	5	2	43	1	2	3	1		2	2	2	6	3	0	0	0	0	0		1	0	0	0	0	0	0	0	0	0	0	0	0
2	2015-02-24 14:49:36	2015-02-24 17:17:57	2015-02-24	359000000000000	Phonex	Mvera mission	Vg41	23	3	5	2	19	1	1	3	1		2	2	2	6	3	0	0	0	0	0		1	0	0	0	0	0	0	0	0	0	0	0	0
2	2015-02-24 14:53:12	2015-02-24 17:18:09	2015-02-24	359000000000000	Phonex	Mvera mission	Vg41	23	2	5	1	23	1	1	2	1		2	2	2	6	3	0	0	0	0	0		1	0	0	0	0	0	0	0	0	0	0	0	0
2	2015-02-24 14:53:22	2015-02-24 19:14:06	2015-02-24	360000000000000	Saukila	Chankhungu	Vg72	2	1	1	1	40	1	1	1	1		3	1	1	5	3	0	0	0	0	0		1	0	0	0	0	0	0	0	0	0	0	0	0
2	2015-02-24 15:00:11	2015-02-24 19:14:19	2015-02-24	360000000000000	Saukila	Chankhungu	Vg72	2	2	3	2	35	1	1	2	2		3	1	1	5	3	0	0	0	0	0		1	0	0	0	0	0	0	0	0	0	0	0	0
2	2015-02-24 15:06:46	2015-02-24 18:11:00	2015-02-24	359000000000000	Collins	Mvera mission	Vg59	34	1	1	1	34	1	1	2	1		5	2	0	7	3	0	0	0	0	0		1	0	0	0	0	0	0	0	0	0	0	0	0
2	2015-02-24 15:12:49	2015-02-24 18:17:32	2015-02-24	352000000000000	Helecks	Mvera mission	Vg60	23	2	6	1	17	1	4	2	5		0	1	1	2	3	0	0	0	0	0		1	0	0	0	0	0	0	0	0	0	0	0	0
2	2015-02-24 15:13:53	2015-02-24 18:11:17	2015-02-24	359000000000000	Collins	Mvera mission	Vg59	34	2	3	2	31	1	1	2	1		5	2	0	7	3	0	0	0	0	0		1	0	0	0	0	0	0	0	0	0	0	0	0
2	2015-02-24 15:43:36	2015-02-24 17:18:30	2015-02-24	359000000000000	Phonex	Mvera mission	Vg41	21	1	1	2	62	1	2	3	3		1	1	1	3	3	0	0	0	0	0		1	0	0	0	0	0	0	0	0	0	0	0	0
2	2015-02-24 15:47:17	2015-02-24 17:18:41	2015-02-24	359000000000000	Phonex	Mvera mission	Vg41	21	2	5	1	23	1	4	2	3		1	1	1	3	3	0	0	0	0	0		1	0	0	0	0	0	0	0	0	0	0	0	0
2	2015-02-24 15:48:07	2015-02-24 18:18:17	2015-02-24	352000000000000	Helecks	Mvera mission	Vg60	31	2	3	2	31	1	1	3	1		3	2	0	5	3	0	0	0	0	0		1	0	0	0	0	0	0	0	0	0	0	0	0
2	2015-02-24 16:02:47	2015-02-25 16:20:09	2015-02-24	359000000000000	Gausi	Chankhungu	Vg120	12	5	5	1	21	1	4	3	5		2	3	2	7	3	0	0	0	0	0		1	0	0	0	0	0	0	0	0	0	0	0	0
2	2015-02-25 10:40:58	2015-02-25 16:21:53	2015-02-25	360000000000000	Patrick	Mvera Mission	Vg16	4	1	1	1	22	1	1	3	1		1	2	0	3	3	0	0	0	0	0		1	0	0	0	0	0	0	0	0	0	0	0	0
2	2015-02-25 10:48:15	2015-02-25 16:22:09	2015-02-25	360000000000000	Patrick	Mvera Mission	Vg16	4	2	3	2	21	1	1	2	1		1	2	0	3	3	0	0	0	0	0		1	0	0	0	0	0	0	0	0	0	0	0	0
2	2015-02-25 10:48:27	2015-02-25 18:57:10	2015-02-25	359000000000000	Phonex	Mvera mission	Vg46	31	1	1	2	65	1	3	2	1		2	2	2	6	3	0	0	0	0	0		1	0	0	0	0	0	0	0	0	0	0	0	0
2	2015-02-25 10:53:12	2015-02-25 18:42:22	2015-02-25	359000000000000	Alex	Mvera mission	Vg45	8	1	1	1	74	1	2	3	1		1	4	1	6	3	0	0	0	0	0		1	0	0	0	0	0	0	0	0	0	0	0	0
2	2015-02-25 11:00:32	2015-02-25 18:57:41	2015-02-25	359000000000000	Phonex	Mvera mission	Vg46	31	3	5	1	19	1	4	3	5		2	2	2	6	3	0	0	0	0	0		1	0	0	0	0	0	0	0	0	0	0	0	0
2	2015-02-25 11:05:53	2015-02-25 18:42:42	2015-02-25	359000000000000	Alex	Mvera mission	Vg45	8	3	6	1	22	1	4	3	1		1	4	1	6	3	0	0	0	0	0		1	0	0	0	0	0	0	0	0	0	0	0	0
2	2015-02-25 11:10:33	2015-02-25 16:22:35	2015-02-25	360000000000000	Patrick	Mvera Mission	Vg16	12	1	1	1	25	1	1	3	1		0	2	0	2	3	0	0	0	0	0		1	0	0	0	0	0	0	0	0	0	0	0	0
2	2015-02-25 11:10:41	2015-02-25 16:43:28	2015-02-25	360000000000000	Eddah	Mvera Mission	Vg14	26	1	1	1	36	1	1	2	3		3	2	0	5	3	0	0	0	0	0		1	0	0	0	0	0	0	0	0	0	0	0	0
2	2015-02-25 11:11:02	2015-02-25 18:43:07	2015-02-25	359000000000000	Alex	Mvera mission	Vg45	8	5	5	1	18	1	4	2	5		1	4	1	6	3	0	0	0	0	0		1	0	0	0	0	0	0	0	0	0	0	0	0
2	2015-02-25 11:12:11	2015-02-25 15:59:18	2015-02-25	359000000000000	Valens	Mvera mission	Vg24	33	4	5	2	24	1	4	3	1		3	5	2	10	3	0	0	0	0	0		1	0	0	0	0	0	0	0	0	0	0	0	0
2	2015-02-25 11:14:44	2015-02-25 16:23:04	2015-02-25	360000000000000	Patrick	Mvera Mission	Vg16	12	2	3	2	21	1	1	3	1		0	2	0	2	3	0	0	0	0	0		1	0	0	0	0	0	0	0	0	0	0	0	0
2	2015-02-25 11:15:51	2015-02-25 16:43:45	2015-02-25	360000000000000	Eddah	Mvera Mission	Vg14	26	2	3	2	29	1	1	1	3		3	2	0	5	3	0	0	0	0	0		1	0	0	0	0	0	0	0	0	0	0	0	0
2	2015-02-25 11:19:32	2015-02-25 18:43:24	2015-02-25	359000000000000	Alex	Mvera mission	Vg45	8	2	5	2	37	1	2	3	1		1	4	1	6	3	0	0	0	0	0		1	0	0	0	0	0	0	0	0	0	0	0	0
2	2015-02-25 11:21:06	2015-02-25 18:58:09	2015-02-25	359000000000000	Phonex	Mvera mission	Vg46	21	1	1	1	45	1	3	3	1		2	1	1	4	3	0	0	0	0	0		1	0	0	0	0	0	0	0	0	0	0	0	0
2	2015-02-25 11:22:47	2015-02-25 15:59:38	2015-02-25	359000000000000	Valens	Mvera mission	Vg24	33	7	5	1	15	1	4	2	5		3	5	2	10	3	0	0	0	0	0		1	0	0	0	0	0	0	0	0	0	0	0	0
2	2015-02-25 11:27:19	2015-02-25 16:00:03	2015-02-25	359000000000000	Valens	Mvera mission	Vg24	33	5	5	2	18	1	4	3	5		3	5	2	10	3	0	0	0	0	0		1	0	0	0	0	0	0	0	0	0	0	0	0
2	2015-02-25 11:29:45	2015-02-25 16:23:24	2015-02-25	360000000000000	Patrick	Mvera Mission	Vg16	3	1	1	1	51	1	1	2	1		3	3	2	8	3	0	0	0	0	0		1	0	0	0	0	0	0	0	0	0	0	0	0
2	2015-02-25 11:35:48	2015-02-25 16:23:40	2015-02-25	360000000000000	Patrick	Mvera Mission	Vg16	3	2	3	2	40	1	1	2	1		3	3	2	8	3	0	0	0	0	0		1	0	0	0	0	0	0	0	0	0	0	0	0
2	2015-02-25 11:45:52	2015-02-25 16:24:16	2015-02-25	360000000000000	Patrick	Mvera Mission	Vg16	3	5	5	2	18	1	4	2	1		3	3	2	8	3	0	0	1	1	0		1	0	0	0	0	0	0	0	0	0	0	0	0
2	2015-02-25 11:46:22	2015-02-25 16:19:43	2015-02-25	359000000000000	Gausi	Mvera mission	Vg25	69	1	1	1	35	1	1	2	1		2	2	0	4	3	0	0	0	0	0		1	0	0	0	0	0	0	0	0	0	0	0	0
2	2015-02-25 11:46:49	2015-02-25 19:10:08	2015-02-25	356000000000000	Maureen	Mvera mission	Vg48	53	5	6	1	21	1	4	3	5		2	4	3	9	3	0	0	0	0	0		1	0	0	0	0	0	0	0	0	0	0	0	0
2	2015-02-25 11:49:10	2015-02-25 16:00:47	2015-02-25	359000000000000	Valens	Mvera mission	Vg24	30	2	3	2	37	1	1	3	4		2	3	0	5	3	0	0	0	0	0		1	0	0	0	0	0	0	0	0	0	0	0	0
2	2015-02-25 11:49:23	2015-02-25 18:58:49	2015-02-25	359000000000000	Phonex	Mvera mission	Vg46	26	1	1	1	40	1	1	3	2		2	2	1	5	3	0	0	0	0	0		1	0	0	0	0	0	0	0	0	0	0	0	0
2	2015-02-25 11:51:08	2015-02-25 19:10:22	2015-02-25	356000000000000	Maureen	Mvera mission	Vg48	53	6	6	1	19	1	4	3	5		2	4	3	9	3	0	0	0	0	0		1	0	0	0	0	0	0	0	0	0	0	0	0
2	2015-02-25 11:51:26	2015-02-25 16:19:24	2015-02-25	359000000000000	Gausi	Mvera mission	Vg25	69	2	3	2	30	1	1	2	1		2	2	0	4	3	0	0	0	0	0		1	0	0	0	0	0	0	0	0	0	0	0	0
2	2015-02-25 11:56:48	2015-02-25 18:44:19	2015-02-25	359000000000000	Alex	Mvera mission	Vg45	16	1	1	1	42	2	1	2	1		2	2	1	5	3	0	0	0	0	0		1	0	0	0	0	0	0	0	0	0	0	0	0
2	2015-02-25 11:57:50	2015-02-25 17:14:42	2015-02-25	360000000000000	Saukila	Mvera mission	Vg21	33	1	1	2	45	1	3	2	2		0	2	1	3	3	0	0	0	0	0		1	0	0	0	0	0	0	0	0	0	0	0	0
2	2015-02-25 12:02:57	2015-02-25 18:39:53	2015-02-25	359000000000000	Collins	Mvera mission	Vg59	24	1	1	1	41	1	1	2	1		2	2	1	5	3	0	0	0	0	0		1	0	0	0	0	0	0	0	0	0	0	0	0
2	2015-02-25 12:03:38	2015-02-25 19:10:52	2015-02-25	356000000000000	Maureen	Mvera mission	Vg48	53	3	4	1	74	1	3	2	1		2	4	3	9	3	0	0	1	0	0		1	0	0	0	0	0	0	0	0	0	0	0	0
2	2015-02-25 12:04:48	2015-02-25 17:15:05	2015-02-25	360000000000000	Saukila	Mvera mission	Vg21	33	3	5	2	15	1	4	3	5		0	2	1	3	3	0	0	0	0	0		1	0	0	0	0	0	0	0	0	0	0	0	0
2	2015-02-25 12:07:31	2015-02-25 18:40:04	2015-02-25	359000000000000	Collins	Mvera mission	Vg59	24	2	3	2	36	1	1	2	1		2	2	1	5	3	0	0	0	0	0		1	0	0	0	0	0	0	0	0	0	0	0	0
2	2015-02-25 12:09:09	2015-02-25 18:52:30	2015-02-25	356000000000000	Halima	Mvera mission	Vg30	3	1	3	2	32	1	1	3	4		4	3	0	7	2	0	0	0	0	0		1	0	0	0	0	0	0	0	0	0	0	0	0
2	2015-02-25 12:09:38	2015-02-25 16:02:12	2015-02-25	359000000000000	Valens	Mvera mission	Vg24	26	2	3	2	37	1	1	3	1		2	4	1	7	3	0	0	0	0	0		1	0	0	0	0	0	0	0	0	0	0	0	0
2	2015-02-25 12:09:51	2015-02-25 18:59:13	2015-02-25	359000000000000	Phonex	Mvera mission	Vg46	25	2	3	2	30	1	1	3	4		3	2	0	5	3	0	0	0	0	0		1	0	0	0	0	0	0	0	0	0	0	0	0
2	2015-02-25 12:14:20	2015-02-25 18:59:47	2015-02-25	359000000000000	Phonex	Mvera mission	Vg46	25	1	1	1	32	2	1	3	4		3	2	0	5	3	0	0	0	0	0		1	0	0	0	0	0	0	0	0	0	0	0	0
2	2015-02-25 12:18:36	2015-02-25 16:02:24	2015-02-25	359000000000000	Valens	Mvera mission	Vg24	26	5	5	1	15	1	4	2	5		2	4	1	7	3	0	0	0	0	0		1	0	0	0	0	0	0	0	0	0	0	0	0
2	2015-02-25 12:23:40	2015-02-25 16:02:37	2015-02-25	359000000000000	Valens	Mvera mission	Vg24	26	3	5	1	21	1	4	3	1		2	4	1	7	3	0	0	0	0	0		1	0	0	0	0	0	0	0	0	0	0	0	0
2	2015-02-25 12:25:06	2015-02-25 17:16:05	2015-02-25	360000000000000	Saukila	Mvera mission	Vg21	41	2	3	2	18	1	1	2	3		1	2	0	3	3	0	0	0	0	0		1	0	0	0	0	0	0	0	0	0	0	0	0
2	2015-02-25 12:26:24	2015-02-25 18:45:13	2015-02-25	359000000000000	Alex	Mvera mission	Vg45	19	1	1	1	69	2	1	4	1		1	2	1	4	3	0	0	0	0	0		1	0	0	0	0	0	0	0	0	0	0	0	0
2	2015-02-25 12:28:31	2015-02-25 18:54:56	2015-02-25	356000000000000	Halima	Mvera mission	Vg30	3	3	6	2	17	1	4	3	5		4	3	0	7	2	0	0	0	0	0		1	0	0	0	0	0	0	0	0	0	0	0	0
2	2015-02-25 12:33:41	2015-02-25 16:18:50	2015-02-25	359000000000000	Gausi	Mvera mission	Vg25	40	1	1	1	72	1	1	4	1		1	1	3	5	3	0	0	0	0	0		1	0	0	0	0	0	0	0	0	0	0	0	0
2	2015-02-25 12:38:40	2015-02-25 18:45:52	2015-02-25	359000000000000	Alex	Mvera mission	Vg45	19	3	6	2	35	1	3	2	1		1	2	1	4	3	0	0	0	0	0		1	0	0	0	0	0	0	0	0	0	0	1	0		media\1424861199102.jpg
2	2015-02-25 12:41:04	2015-02-25 17:24:26	2015-02-25	360000000000000	Saukila	Mvera mission	Vg21	42	2	3	2	24	1	1	2	2		2	2	0	4	2	0	0	0	0	0		1	0	0	0	0	0	0	0	0	0	0	0	0
2	2015-02-25 12:44:23	2015-02-25 17:25:00	2015-02-25	360000000000000	Saukila	Mvera mission	Vg21	42	1	1	1	28	1	1	3	3		2	2	0	4	2	0	0	0	0	0		1	0	0	0	0	0	0	0	0	0	0	0	0
2	2015-02-25 12:44:33	2015-02-25 16:18:16	2015-02-25	359000000000000	Gausi	Mvera mission	Vg25	40	2	3	2	70	1	1	4	1		1	1	3	5	3	0	0	0	0	0		1	0	0	0	0	0	0	0	0	0	0	0	0
2	2015-02-25 12:46:40	2015-02-25 16:44:48	2015-02-25	360000000000000	Eddah	Mvera Mission	Vg14	25	4	5	1	17	1	4	2	1		1	3	2	6	3	0	0	0	0	0		1	0	0	0	0	0	0	0	0	0	0	0	0
2	2015-02-25 12:47:26	2015-02-25 18:41:05	2015-02-25	359000000000000	Collins	Mvera mission	Vg59	36	1	5	2	18	1	4	2	1		0	2	0	2	3	0	0	0	0	0		1	0	0	0	0	0	0	0	0	0	0	0	0
2	2015-02-25 12:47:48	2015-02-25 16:03:41	2015-02-25	359000000000000	Valens	Mvera mission	Vg24	25	2	3	2	46	1	1	3	4		0	0	2	2	3	0	0	0	0	0		1	0	0	0	0	0	0	0	0	0	0	0	0
2	2015-02-25 12:52:24	2015-02-25 18:53:40	2015-02-25	356000000000000	Halima	Mvera mission	Vg30	7	3	6	2	29	1	2	3	1		2	3	0	5	2	0	0	0	0	0		1	0	0	0	0	0	0	0	0	0	0	0	0
2	2015-02-25 12:56:37	2015-02-25 16:17:27	2015-02-25	359000000000000	Gausi	Mvera mission	Vg25	40	4	5	1	17	1	4	3	5		1	1	3	5	3	0	1	0	0	0		1	0	1	0	0	0	0	0	0	1	0	0	0		media\1424862408458.jpg
2	2015-02-25 12:58:36	2015-02-25 18:46:15	2015-02-25	359000000000000	Alex	Mvera mission	Vg45	30	1	1	1	88	1	1	2	1		0	0	2	2	3	0	0	0	0	0		1	0	0	0	0	0	0	0	0	0	0	0	0
2	2015-02-25 12:59:34	2015-02-25 19:12:28	2015-02-25	356000000000000	Maureen	Mvera mission	Vg48	17	1	3	2	23	1	1	2	1		2	2	0	4	3	0	0	0	0	0		1	0	0	0	0	0	0	0	0	0	0	0	0
2	2015-02-25 13:06:25	2015-02-25 16:45:32	2015-02-25	360000000000000	Eddah	Mvera Mission	Vg14	24	1	1	1	23	1	1	3	3		0	2	0	2	3	0	0	0	0	0		1	0	0	0	0	0	0	0	0	0	0	0	0
2	2015-02-25 13:08:58	2015-02-25 18:46:29	2015-02-25	359000000000000	Alex	Mvera mission	Vg45	30	2	3	2	80	1	1	1	1		0	0	2	2	3	0	0	0	0	0		1	0	0	0	0	0	0	0	0	0	0	0	0
2	2015-02-25 13:11:07	2015-02-25 19:12:51	2015-02-25	356000000000000	Maureen	Mvera mission	Vg48	13	2	3	2	36	1	1	2	4		2	2	0	4	3	0	0	0	0	0		1	0	0	0	0	0	0	0	0	0	0	0	0
2	2015-02-25 13:12:52	2015-02-25 16:45:46	2015-02-25	360000000000000	Eddah	Mvera Mission	Vg14	24	2	3	2	18	1	1	2	3		0	2	0	2	3	0	0	0	0	0		1	0	0	0	0	0	0	0	0	0	0	0	0
2	2015-02-25 13:15:49	2015-02-25 18:54:07	2015-02-25	356000000000000	Halima	Mvera mission	Vg30	5	3	5	2	21	1	4	3	5		0	2	2	4	3	0	0	0	0	0		1	0	0	0	0	0	0	0	0	0	0	0	0
2	2015-02-25 13:16:36	2015-02-25 19:13:06	2015-02-25	356000000000000	Maureen	Mvera mission	Vg48	13	1	1	1	39	1	1	3	4		2	2	0	4	3	0	0	0	0	0		1	0	0	0	0	0	0	0	0	0	0	0	0
2	2015-02-25 13:24:59	2015-02-25 18:41:18	2015-02-25	359000000000000	Collins	Mvera mission	Vg59	21	1	1	1	22	1	1	3	1		0	2	0	2	3	0	0	0	0	0		1	0	0	0	0	0	0	0	0	0	0	0	0
2	2015-02-25 13:26:28	2015-02-26 09:17:21	2015-02-25	360000000000000	Saukila	Mvera mission	Vg21	8	2	3	2	19	1	1	2	2		1	2	0	3	3	0	0	0	0	0		1	0	0	0	0	0	0	0	0	0	0	0	0
2	2015-02-25 13:27:10	2015-02-25 16:26:59	2015-02-25	360000000000000	Patrick	Mvera Mission	Vg16	1	2	3	2	45	1	1	1	2		1	0	2	3	3	0	0	0	0	0		1	0	0	0	0	0	0	0	0	0	0	0	0
2	2015-03-05 11:37:17	2015-03-05 16:11:44	2015-03-05	360000000000000	Eddah	Khuwi	Vg47	5	2	3	2	46	1	1	2	1		5	2	2	9	3	0	0	0	0	0		1	0	0	0	0	0	0	0	0	0	0	0	0
2	2015-02-25 13:27:56	2015-02-25 18:46:46	2015-02-25	359000000000000	Alex	Mvera mission	Vg45	23	6	3	2	38	1	1	2	1		3	4	0	7	3	0	0	0	0	0		1	0	0	0	0	0	0	0	0	0	0	0	0
2	2015-02-25 13:28:14	2015-02-25 18:41:29	2015-02-25	359000000000000	Collins	Mvera mission	Vg59	21	2	3	2	20	1	1	2	1		0	2	0	2	3	0	0	0	0	0		1	0	0	0	0	0	0	0	0	0	0	0	0
2	2015-02-25 13:28:40	2015-02-25 16:04:26	2015-02-25	359000000000000	Valens	Mvera mission	Vg24	24	2	3	2	21	1	1	2	1		1	2	0	3	3	0	0	0	0	0		1	0	0	0	0	0	0	0	0	0	0	0	0
2	2015-02-25 13:29:25	2015-02-25 19:13:38	2015-02-25	356000000000000	Maureen	Mvera mission	Vg48	21	1	1	1	67	1	2	3	other	Retired police	0	0	1	1	3	0	0	0	0	0		1	0	0	0	0	0	0	0	0	0	0	0	0
2	2015-02-25 13:30:27	2015-02-25 19:00:27	2015-02-25	359000000000000	Phonex	Mvera mission	Vg46	10	1	1	2	42	1	2	3	4		0	2	1	3	2	0	0	0	0	0		1	0	0	0	0	0	0	0	0	0	0	0	0
2	2015-02-25 13:35:35	2015-02-25 16:14:31	2015-02-25	359000000000000	Gausi	Mvera mission	Vg25	65	2	5	2	37	1	3	3	4		4	4	1	9	3	0	0	0	0	0		1	0	0	0	0	0	0	0	0	0	0	0	0
2	2015-02-25 13:36:41	2015-02-25 19:00:44	2015-02-25	359000000000000	Phonex	Mvera mission	Vg46	10	2	5	2	18	1	4	3	5		0	2	1	3	2	0	0	0	0	0		1	0	0	0	0	0	0	0	0	0	0	0	0
2	2015-02-25 13:39:26	2015-02-25 19:00:57	2015-02-25	359000000000000	Phonex	Mvera mission	Vg46	10	3	5	1	16	1	4	3	5		0	2	1	3	2	0	0	0	0	0		1	0	0	0	0	0	0	0	0	0	0	0	0
2	2015-02-25 13:50:00	2015-02-25 16:27:32	2015-02-25	360000000000000	Patrick	Mvera Mission	Vg16	2	1	1	1	40	1	1	3	1		3	1	1	5	3	0	0	0	0	0		1	0	0	0	0	0	0	0	0	0	0	0	0
2	2015-02-25 13:52:53	2015-02-25 19:13:54	2015-02-25	356000000000000	Maureen	Mvera mission	Vg48	36	1	3	2	25	1	1	3	1		1	2	0	3	3	0	0	1	0	0		1	0	0	0	0	0	0	0	0	0	0	0	0
2	2015-02-25 13:56:55	2015-02-25 16:15:40	2015-02-25	359000000000000	Gausi	Mvera mission	Vg25	65	3	5	2	20	1	4	2	5		4	4	1	9	3	0	0	0	0	0		1	0	0	0	0	0	0	0	0	0	0	0	0
2	2015-02-25 13:57:58	2015-02-25 19:14:24	2015-02-25	356000000000000	Maureen	Mvera mission	Vg48	36	2	1	1	30	1	1	3	4		1	2	0	3	3	0	0	0	0	0		1	0	0	0	0	0	0	0	0	0	0	0	0
2	2015-02-25 14:01:27	2015-02-25 19:02:29	2015-02-25	359000000000000	Phonex	Mvera mission	Vg46	1	2	3	2	27	1	1	3	other	Pastor	1	2	0	3	2	0	0	0	0	0		1	0	0	0	0	0	0	0	0	0	0	0	0
2	2015-02-25 14:05:08	2015-02-25 18:47:35	2015-02-25	359000000000000	Alex	Mvera mission	Vg45	26	1	3	2	21	1	1	3	4		1	2	0	3	3	0	0	0	0	0		1	0	0	0	0	0	0	0	0	0	0	0	0
2	2015-02-25 14:12:54	2015-02-25 19:02:48	2015-02-25	359000000000000	Phonex	Mvera mission	Vg46	2	1	1	1	52	1	1	2	1		2	0	2	4	3	0	0	0	0	0		1	0	0	0	0	0	0	0	0	0	0	0	0
2	2015-02-25 14:13:57	2015-02-25 16:12:54	2015-02-25	359000000000000	Gausi	Mvera mission	Vg25	65	4	5	1	23	1	4	3	3		4	4	1	9	3	0	0	0	0	0		1	0	0	0	0	0	0	0	0	0	0	0	0
2	2015-02-25 14:14:21	2015-02-25 19:03:09	2015-02-25	359000000000000	Phonex	Mvera mission	Vg46	2	2	3	2	46	1	1	1	1		2	0	2	4	3	0	0	0	0	0		1	0	0	0	0	0	0	0	0	0	0	0	0
2	2015-02-25 14:14:25	2015-02-25 16:05:41	2015-02-25	359000000000000	Valens	Mvera mission	Vg24	33	1	1	1	47	1	1	3	4		3	5	2	10	3	0	0	0	0	0		1	0	0	0	0	0	0	0	0	0	0	0	0
2	2015-02-25 14:14:44	2015-02-25 16:28:36	2015-02-25	360000000000000	Patrick	Mvera Mission	Vg16	22	1	1	2	48	1	3	2	1		0	0	1	1	3	0	0	1	0	0		1	0	0	0	0	0	0	0	0	0	0	1	0		media\1424866789396.jpg
2	2015-02-25 14:17:30	2015-02-25 16:13:56	2015-02-25	359000000000000	Gausi	Mvera mission	Vg25	65	5	5	2	19	1	4	3	1		4	4	1	9	3	0	0	0	0	0		1	0	0	0	0	0	0	0	0	0	0	0	0
2	2015-02-25 14:21:08	2015-02-25 16:05:52	2015-02-25	359000000000000	Valens	Mvera mission	Vg24	33	2	3	2	45	1	1	3	4		3	5	2	10	3	0	0	0	0	0		1	0	0	0	0	0	0	0	0	0	0	0	0
2	2015-02-25 14:22:08	2015-02-25 18:48:33	2015-02-25	359000000000000	Alex	Mvera mission	Vg45	27	1	3	2	32	1	1	2	1		5	2	1	8	3	0	0	0	0	0		1	0	0	0	0	0	0	0	0	0	0	1	0		media\1424867450879.jpg
2	2015-02-25 14:31:52	2015-02-25 18:48:51	2015-02-25	359000000000000	Alex	Mvera mission	Vg45	27	2	1	1	41	1	1	2	1		5	2	1	8	3	0	0	0	0	0		1	0	0	0	0	0	0	0	0	0	0	0	0
2	2015-02-25 14:35:44	2015-02-25 18:50:07	2015-02-25	359000000000000	Alex	Mvera mission	Vg45	27	3	5	1	16	1	4	2	5		5	2	1	8	3	0	0	0	0	0		1	0	0	0	0	0	0	0	0	0	0	0	0
2	2015-02-25 14:44:29	2015-02-25 18:55:49	2015-02-25	356000000000000	Halima	Mvera mission	Vg30	21	1	1	1	30	1	1	4	5		2	2	1	5	3	0	0	0	0	0		1	0	0	0	0	0	0	0	0	0	0	0	0
2	2015-02-25 14:53:07	2015-02-25 18:56:01	2015-02-25	356000000000000	Halima	Mvera mission	Vg30	21	2	3	2	27	1	1	3	1		2	2	1	5	3	0	0	0	0	0		1	0	0	0	0	0	0	0	0	0	0	0	0
2	2015-02-25 14:59:05	2015-02-25 18:56:12	2015-02-25	356000000000000	Halima	Mvera mission	Vg30	21	3	6	2	93	1	3	2	other	House keeper	2	2	1	5	3	0	0	0	0	0		1	0	0	0	0	0	0	0	0	0	0	0	0
2	2015-02-25 15:32:48	2015-02-25 18:41:45	2015-02-25	359000000000000	Collins	Mvera mission	Vg30	27	1	1	2	79	1	3	2	1		0	2	1	3	3	0	0	0	0	0		1	0	0	0	0	0	0	0	0	0	0	0	0
2	2015-02-25 15:43:37	2015-02-25 18:56:45	2015-02-25	356000000000000	Halima	Mvera mission	Vg30	29	2	3	2	30	1	1	2	2		3	3	1	7	3	0	0	0	0	0		1	0	0	0	0	0	0	0	0	0	0	0	0
2	2015-02-25 16:16:47	2015-02-25 19:16:34	2015-02-25	356000000000000	Maureen	Mvera mission	Vg48	41	1	1	1	63	1	1	2	1		0	0	2	2	3	0	0	0	0	0		1	0	0	0	0	0	0	0	0	0	0	0	0
2	2015-02-26 10:48:53	2015-02-26 16:38:44	2015-02-26	360000000000000	Patrick	Mvera Mission	Vg52	29	2	4	2	77	1	3	2	1		1	2	3	6	3	0	0	0	0	0		1	0	0	0	0	1	0	0	0	0	0	1	0		media\1424941010917.jpg
2	2015-02-26 10:50:00	2015-02-26 17:12:04	2015-02-26	360000000000000	Eddah	Mvera Mission	Vg14	8	1	1	1	50	1	1	2	1		0	2	2	4	3	0	0	0	0	0		1	0	0	0	0	0	0	0	0	0	0	0	0
2	2015-02-26 10:58:49	2015-02-26 17:12:32	2015-02-26	360000000000000	Eddah	Mvera Mission	Vg14	8	2	3	2	45	1	1	2	1		0	2	2	4	3	0	0	0	0	0		1	0	0	0	0	0	0	0	0	0	0	0	0
2	2015-02-26 11:04:33	2015-02-26 17:13:05	2015-02-26	360000000000000	Eddah	Mvera Mission	Vg14	8	4	5	1	15	1	4	2	5		0	2	2	4	3	0	0	0	0	0		1	0	0	0	0	0	0	0	0	0	0	0	0
2	2015-02-26 11:06:38	2015-02-26 17:16:34	2015-02-26	359000000000000	Gausi	Mvera mission	Vg14	5	2	3	2	23	1	1	2	1		2	2	0	4	3	0	0	0	0	0		1	0	0	0	0	0	0	0	0	0	0	0	0
2	2015-02-26 11:07:23	2015-02-26 16:39:07	2015-02-26	360000000000000	Patrick	Mvera Mission	Vg52	29	3	3	2	52	1	1	2	1		1	2	3	6	3	0	0	0	0	0		1	0	0	0	0	0	0	0	0	0	0	0	0
2	2015-02-26 11:13:01	2015-02-26 18:42:54	2015-02-26	360000000000000	Saukila	Mvera mission	Vg49	14	2	3	2	52	1	1	2	2		0	1	2	3	3	0	0	0	0	0		1	0	0	0	0	0	0	0	0	0	0	0	0
2	2015-02-26 11:14:42	2015-02-26 16:40:05	2015-02-26	360000000000000	Patrick	Mvera Mission	Vg52	29	5	5	1	18	1	4	3	1		1	2	3	6	3	0	1	1	0	0		1	0	0	0	0	0	0	0	0	0	0	0	0
2	2015-02-26 11:20:11	2015-02-26 18:43:24	2015-02-26	360000000000000	Saukila	Mvera mission	Vg49	14	3	5	2	21	1	4	3	2		0	1	2	3	3	0	0	0	0	0		1	0	0	0	0	0	0	0	0	0	0	0	0
2	2015-02-26 11:23:40	2015-02-26 18:03:23	2015-02-26	359000000000000	Phonex	Mvera mission	Vg27	11	1	1	2	36	1	2	2	3		3	3	0	6	3	0	0	0	0	0		1	0	0	0	0	0	0	0	0	0	0	0	0
2	2015-02-26 11:31:21	2015-02-26 16:42:58	2015-02-26	360000000000000	Patrick	Mvera Mission	Vg52	27	2	3	2	34	1	1	3	2		2	2	0	4	3	0	0	0	0	0		1	0	0	0	0	0	0	0	0	0	0	0	0
2	2015-02-26 11:36:36	2015-02-26 18:44:27	2015-02-26	360000000000000	Saukila	Mvera mission	Vg49	23	2	3	2	54	1	1	2	2		1	2	2	5	2	0	0	0	0	0		1	0	0	0	0	0	0	0	0	0	0	0	0
2	2015-02-26 11:44:49	2015-02-26 18:44:50	2015-02-26	360000000000000	Saukila	Mvera mission	Vg49	23	3	5	2	22	1	4	3	1		1	2	2	5	2	0	0	0	0	0		1	0	0	0	0	0	0	0	0	0	0	0	0
2	2015-02-26 11:47:15	2015-02-26 17:18:12	2015-02-26	359000000000000	Collins	Mvera mission	Vg29	14	3	3	2	26	1	1	4	4		2	3	0	5	5	0	0	0	0	0		1	0	0	0	0	0	0	0	0	0	0	0	0
2	2015-02-26 11:56:41	2015-02-26 18:45:19	2015-02-26	360000000000000	Saukila	Mvera mission	Vg49	24	2	3	2	25	1	1	2	other	Housewife	1	2	0	3	3	0	0	0	0	0		1	0	0	0	0	0	0	0	0	0	0	0	0
2	2015-02-26 11:59:41	2015-02-26 18:14:02	2015-02-26	359000000000000	Valens	Mvera mission	Vg34	10	3	3	2	45	1	1	1	1		3	3	3	9	3	0	0	0	0	0		1	0	0	0	0	0	0	0	0	0	0	0	0
2	2015-02-26 12:02:01	2015-02-26 16:45:10	2015-02-26	360000000000000	Patrick	Mvera Mission	Vg52	16	2	3	2	32	1	1	2	3		1	1	1	3	3	0	0	0	0	0		1	0	0	0	0	0	0	0	0	0	0	0	0
2	2015-02-26 12:05:45	2015-02-26 17:14:06	2015-02-26	360000000000000	Eddah	Mvera Mission	Vg14	12	3	5	1	19	1	4	2	5		3	3	1	7	3	0	0	0	0	0		1	0	0	0	0	0	0	0	0	0	0	0	0
2	2015-02-26 12:08:31	2015-02-26 17:14:54	2015-02-26	360000000000000	Eddah	Mvera Mission	Vg14	12	4	5	1	17	1	4	2	5		3	3	1	7	3	0	0	0	0	0		1	0	0	0	0	0	0	0	0	0	0	0	0
2	2015-02-26 12:09:15	2015-02-26 18:14:47	2015-02-26	359000000000000	Valens	Mvera mission	Vg34	10	4	5	1	23	1	4	2	3		3	3	3	9	3	0	0	0	0	0		1	0	0	0	0	0	0	0	0	0	0	0	0
2	2015-02-26 12:12:15	2015-02-26 12:15:54	2015-02-26	359000000000000	Valens	Mvera mission	Vg34	10	6	5	2	17	1	4	2	2		3	3	3	9	3	0	0	0	0	0		1	0	0	0	0	0	0	0	0	0	0	0	0
2	2015-02-26 12:16:53	2015-02-26 17:19:14	2015-02-26	359000000000000	Collins	Mvera mission	Vg29	5	1	7	1	18	1	4	2	3		1	3	0	4	5	0	0	0	0	0		1	0	0	0	0	0	0	0	0	0	0	0	0
2	2015-02-26 12:19:29	2015-02-26 18:04:31	2015-02-26	359000000000000	Phonex	Mvera mission	Vg27	19	1	1	1	85	1	1	1	other	Depends on children	2	0	2	4	3	0	0	0	0	0		1	0	0	0	0	0	0	0	0	0	0	0	0
2	2015-02-26 12:21:16	2015-02-26 18:27:07	2015-02-26	359000000000000	Alex	Mvera mission	Vg2	26	1	3	2	23	1	1	3	1		4	2	0	6	3	0	0	0	0	0		1	0	0	0	0	0	0	0	0	0	0	1	0		media\1424946333351.jpg
2	2015-02-26 12:25:47	2015-02-26 18:04:47	2015-02-26	359000000000000	Phonex	Mvera mission	Vg27	19	2	3	2	82	1	1	2	other	From children	2	0	2	4	3	0	1	0	0	0		1	0	1	0	0	1	0	0	0	0	1	1	0		media\1424946986257.jpg	media\1424947167112.jpg
2	2015-02-26 12:32:31	2015-02-26 18:15:30	2015-02-26	359000000000000	Valens	Mvera mission	Vg34	17	4	5	1	20	1	4	2	1		0	3	2	5	3	0	0	0	0	0		1	0	0	0	0	0	0	0	0	0	0	0	0
2	2015-02-26 12:33:50	2015-02-26 16:47:47	2015-02-26	360000000000000	Patrick	Mvera Mission	Vg52	9	2	3	2	22	1	1	3	1		1	2	0	3	3	0	0	0	0	0		1	0	0	0	0	0	0	0	0	0	0	0	0
2	2015-02-26 12:36:49	2015-02-26 17:20:03	2015-02-26	359000000000000	Collins	Mvera mission	Vg29	38	1	6	2	20	1	4	3	3		0	1	1	2	3	0	0	0	0	0		1	0	0	0	0	0	0	0	0	0	0	0	0
2	2015-02-26 12:39:27	2015-02-26 17:20:21	2015-02-26	359000000000000	Collins	Mvera mission	Vg29	38	2	1	2	67	1	3	1	1		0	1	1	2	3	0	0	0	0	0		1	0	0	0	0	0	0	0	0	0	0	0	0
2	2015-02-26 12:50:07	2015-02-26 17:12:21	2015-02-26	356000000000000	Halima	Mvera mission	Vg36	2	3	5	1	19	1	4	2	1		0	1	2	3	3	0	0	0	0	0		1	0	0	0	0	0	0	0	0	0	0	0	0
2	2015-02-26 12:52:55	2015-02-26 18:15:57	2015-02-26	359000000000000	Valens	Mvera mission	Vg34	24	2	3	2	44	1	1	2	1		2	2	2	6	3	0	0	0	0	0		1	0	0	0	0	0	0	0	0	0	0	0	0
2	2015-02-26 12:55:38	2015-02-26 17:12:38	2015-02-26	356000000000000	Halima	Mvera mission	Vg36	2	1	1	1	66	1	1	2	1		0	1	2	3	3	0	0	0	0	0		1	0	0	0	0	0	0	0	0	0	0	0	0
2	2015-02-26 13:02:27	2015-02-26 17:06:22	2015-02-26	356000000000000	Maureen	Mvera mission	Vg4	6	2	5	2	17	1	4	2	1		5	3	2	10	3	0	0	0	0	0		1	0	0	0	0	0	0	0	0	0	0	0	0
2	2015-02-26 13:04:39	2015-02-26 17:06:34	2015-02-26	356000000000000	Maureen	Mvera mission	Vg4	6	9	1	2	42	1	1	2	2		5	3	2	10	3	0	0	0	0	0		1	0	0	0	0	0	0	0	0	0	0	0	0
2	2015-02-26 13:06:24	2015-02-26 18:16:18	2015-02-26	359000000000000	Valens	Mvera mission	Vg34	24	1	1	1	48	1	1	2	1		2	2	2	6	3	0	0	0	0	0		1	0	0	0	0	0	0	0	0	0	0	0	0
2	2015-02-26 13:07:56	2015-02-26 17:06:50	2015-02-26	356000000000000	Maureen	Mvera mission	Vg4	6	3	5	2	15	1	4	3	5		5	3	2	10	3	0	0	0	0	0		1	0	0	0	0	0	0	0	0	0	0	0	0
2	2015-02-26 13:21:00	2015-02-26 16:49:47	2015-02-26	360000000000000	Patrick	Mvera Mission	Vg52	20	2	4	1	85	1	3	1	1		4	1	2	7	3	0	0	0	0	0		1	0	0	0	0	0	0	0	0	0	0	0	0
2	2015-02-26 13:25:41	2015-02-26 17:20:54	2015-02-26	359000000000000	Collins	Mvera mission	Vg29	1	2	1	1	39	1	1	3	1		4	2	1	7	3	0	0	0	0	0		1	0	0	0	0	0	0	0	0	0	0	0	0
2	2015-02-26 13:28:51	2015-02-26 17:21:07	2015-02-26	359000000000000	Collins	Mvera mission	Vg29	1	3	3	2	33	1	1	1	1		4	2	1	7	3	0	0	0	0	0		1	0	0	0	0	0	0	0	0	0	0	0	0
2	2015-02-26 13:31:54	2015-02-26 18:17:01	2015-02-26	359000000000000	Valens	Mvera mission	Vg34	17	2	3	2	57	1	1	1	1		0	3	2	5	3	0	0	0	0	0		1	0	0	0	0	0	0	0	0	0	0	0	0
2	2015-02-26 13:40:00	2015-02-26 17:13:04	2015-02-26	356000000000000	Halima	Mvera mission	Vg36	13	3	5	2	18	1	4	2	1		3	4	0	7	3	0	0	0	0	0		1	0	0	0	0	0	0	0	0	0	0	0	0
2	2015-02-26 13:42:44	2015-02-26 17:15:20	2015-02-26	360000000000000	Eddah	Mvera Mission	Vg25	21	1	1	1	24	1	1	3	2		1	2	0	3	3	0	0	0	0	0		1	0	0	0	0	0	0	0	0	0	0	0	0
2	2015-02-26 13:44:12	2015-02-26 16:50:15	2015-02-26	360000000000000	Patrick	Mvera Mission	Vg52	23	1	1	1	57	1	1	2	1		3	2	3	8	3	0	0	0	0	0		1	0	0	0	0	0	0	0	0	0	0	0	0
2	2015-02-26 13:47:46	2015-02-26 17:15:42	2015-02-26	360000000000000	Eddah	Mvera Mission	Vg25	21	2	3	2	22	1	1	3	4		1	2	0	3	3	0	0	0	0	0		1	0	0	0	0	0	0	0	0	0	0	0	0
2	2015-02-26 13:48:56	2015-02-26 18:17:39	2015-02-26	359000000000000	Valens	Mvera mission	Vg34	22	1	1	1	26	1	1	2	1		2	2	0	4	3	0	0	0	0	0		1	0	0	0	0	0	0	0	0	0	0	0	0
2	2015-02-26 13:49:03	2015-02-26 16:50:31	2015-02-26	360000000000000	Patrick	Mvera Mission	Vg52	23	2	6	2	72	1	3	2	1		3	2	3	8	3	0	0	0	0	0		1	0	0	0	0	0	0	0	0	0	0	0	0
2	2015-02-26 13:50:35	2015-02-26 17:17:28	2015-02-26	359000000000000	Gausi	Mvera mission	Vg25	34	2	3	2	30	1	1	3	1		2	2	0	4	3	0	1	0	0	0		1	0	1	0	0	0	0	0	0	1	0	0	0		media\1424951710941.jpg
2	2015-02-26 13:59:39	2015-02-26 18:45:57	2015-02-26	360000000000000	Saukila	Mvera mission	Vg49	2	1	1	1	38	1	1	3	4		2	2	0	4	3	0	0	0	0	0		1	0	0	0	0	0	0	0	0	0	0	0	0
2	2015-02-26 14:00:34	2015-02-26 17:21:56	2015-02-26	359000000000000	Collins	Mvera mission	Vg29	2	1	3	1	42	1	1	2	1		0	0	1	1	3	0	0	0	0	0		1	0	0	0	0	0	0	0	0	0	0	0	0
2	2015-02-26 14:10:43	2015-02-26 18:06:22	2015-02-26	359000000000000	Phonex	Mvera mission	Vg27	4	1	1	1	58	1	1	2	1		3	2	2	7	3	0	0	0	0	0		1	0	0	0	0	0	0	0	0	0	0	0	0
2	2015-02-26 14:12:14	2015-02-26 18:17:50	2015-02-26	359000000000000	Valens	Mvera mission	Vg34	22	2	3	2	22	1	1	2	1		2	2	0	4	3	0	0	0	0	0		1	0	0	0	0	0	0	0	0	0	0	0	0
2	2015-02-26 14:14:58	2015-02-26 18:18:37	2015-02-26	359000000000000	Valens	Mvera mission	Vg34	24	3	5	1	18	1	4	2	5		2	2	2	6	3	0	0	0	0	0		1	0	0	0	0	0	0	0	0	0	0	0	0
2	2015-02-26 14:18:46	2015-02-26 16:51:37	2015-02-26	360000000000000	Patrick	Mvera Mission	Vg52	40	2	3	2	86	1	1	2	1		0	1	2	3	3	0	0	0	0	0		1	0	0	0	0	0	0	0	0	0	0	0	0
2	2015-02-26 14:20:19	2015-02-26 17:22:30	2015-02-26	359000000000000	Collins	Mvera mission	Vg29	45	1	3	2	28	1	1	1	2		3	2	0	5	3	0	1	1	0	0		1	0	0	0	0	0	0	0	0	0	0	0	0
2	2015-02-26 14:23:28	2015-02-26 18:06:35	2015-02-26	359000000000000	Phonex	Mvera mission	Vg27	4	2	3	2	48	1	1	2	1		3	2	2	7	3	0	0	0	0	0		1	0	0	0	0	0	0	0	0	0	0	0	0
2	2015-02-26 14:23:36	2015-02-26 17:18:01	2015-02-26	359000000000000	Gausi	Mvera mission	Vg25	35	2	3	1	45	1	1	3	1		2	0	2	4	3	0	0	0	0	0		1	0	0	0	0	0	0	0	0	0	0	0	0
2	2015-02-26 14:23:51	2015-02-26 17:08:21	2015-02-26	356000000000000	Maureen	Mvera mission	Vg4	14	2	3	2	80	1	1	1	1		0	0	2	2	3	0	0	1	0	0		1	0	0	0	0	0	0	0	0	0	0	0	0
2	2015-02-26 14:26:41	2015-02-26 17:22:42	2015-02-26	359000000000000	Collins	Mvera mission	Vg29	45	2	1	1	32	1	1	3	1		3	2	0	5	3	0	0	0	0	0		1	0	0	0	0	0	0	0	0	0	0	0	0
2	2015-02-26 14:26:49	2015-02-26 18:07:16	2015-02-26	359000000000000	Phonex	Mvera mission	Vg27	4	3	5	1	21	1	4	2	1		3	2	2	7	3	0	0	0	0	0		1	0	0	0	0	0	0	0	0	0	0	0	0
2	2015-02-26 14:29:18	2015-02-26 18:07:32	2015-02-26	359000000000000	Phonex	Mvera mission	Vg27	4	4	5	1	17	1	4	2	1		3	2	2	7	3	0	0	0	0	0		1	0	0	0	0	0	0	0	0	0	0	0	0
2	2015-02-26 14:30:15	2015-02-26 17:08:33	2015-02-26	356000000000000	Maureen	Mvera mission	Vg4	14	1	1	1	82	1	1	2	1		0	0	2	2	3	0	0	1	0	0		1	0	0	0	0	0	0	0	0	0	0	0	0
2	2015-02-26 14:41:48	2015-02-26 17:23:03	2015-02-26	359000000000000	Collins	Mvera mission	Vg29	28	2	1	1	70	1	1	2	1		1	3	2	6	3	0	0	1	0	0		1	0	0	0	0	0	0	0	0	0	0	0	0
2	2015-02-26 14:52:05	2015-02-26 17:08:56	2015-02-26	356000000000000	Maureen	Mvera mission	Vg4	16	2	5	1	18	1	4	3	5		3	1	1	5	3	0	0	0	0	0		1	0	0	0	0	0	0	0	0	0	0	0	0
2	2015-02-26 14:57:15	2015-02-26 17:23:21	2015-02-26	359000000000000	Collins	Mvera mission	Vg29	28	6	6	1	20	1	4	3	3		1	3	2	6	3	0	0	0	0	0		1	0	0	0	0	0	0	0	0	0	0	0	0
2	2015-02-26 14:58:57	2015-02-26 18:30:51	2015-02-26	359000000000000	Alex	Mvera mission	Vg43	15	1	1	2	60	1	2	3	1		2	2	1	5	3	0	0	0	0	0		1	0	0	0	0	0	0	0	0	0	0	0	0
2	2015-02-26 14:59:18	2015-02-26 17:14:38	2015-02-26	356000000000000	Halima	Mvera mission	Vg30	1	3	6	2	22	1	1	3	1		1	3	2	6	2	0	0	0	0	0		1	0	0	0	0	0	0	0	0	0	0	0	0
2	2015-02-26 15:30:27	2015-02-26 18:08:41	2015-02-26	359000000000000	Phonex	Mvera mission	Vg27	2	1	1	2	57	1	3	2	3		2	0	1	3	3	0	0	0	0	0		1	0	0	0	0	0	0	0	0	0	0	0	0
2	2015-02-26 15:39:32	2015-02-26 17:14:50	2015-02-26	356000000000000	Halima	Mvera mission	Vg30	1	2	1	1	50	1	1	3	4		1	3	2	6	2	0	0	0	0	0		1	0	0	0	0	0	0	0	0	0	0	0	0
2	2015-02-26 15:52:39	2015-02-26 18:38:34	2015-02-26	356000000000000	Maureen	Mvera mission	Vg4	29	1	1	2	35	1	3	2	1		3	1	0	4	3	0	0	0	0	0		1	0	0	0	0	0	0	0	0	0	0	0	0
2	2015-02-26 16:01:36	2015-02-26 17:23:35	2015-02-26	359000000000000	Collins	Mvera mission	Vg29	28	5	6	2	20	1	4	3	5		1	3	2	6	3	0	0	0	0	0		1	0	0	0	0	0	0	0	0	0	0	0	0
2	2015-02-26 16:11:30	2015-02-26 17:15:49	2015-02-26	356000000000000	Halima	Mvera mission	Vg30	29	4	5	1	16	1	4	2	5		3	3	1	7	3	0	0	1	0	1	Chest pain	1	0	0	0	0	0	0	0	0	0	0	0	0
2	2015-02-26 16:23:05	2015-02-26 17:10:41	2015-02-26	356000000000000	Maureen	Mvera mission	Vg4	13	1	2	1	39	1	1	2	1		2	4	0	6	3	0	0	0	0	0		1	0	0	0	0	0	0	0	0	0	0	0	0
2	2015-02-27 11:02:46	2015-02-27 19:24:35	2015-02-27	356000000000000	Halima	Mvera mission	Vg36	16	1	1	2	77	1	2	2	1		0	0	1	1	3	0	0	0	0	0		1	0	0	0	0	0	0	0	0	0	0	0	0
2	2015-02-27 11:34:06	2015-02-27 19:24:56	2015-02-27	356000000000000	Halima	Mvera mission	Vg36	20	1	3	2	34	1	1	2	1		4	2	0	6	3	0	0	0	0	0		1	0	0	0	0	0	0	0	0	0	0	0	0
2	2015-02-27 11:47:46	2015-02-27 18:03:29	2015-02-27	359000000000000	Gausi	Mvera mission	Vg49	46	2	3	2	32	1	1	3	1		3	2	0	5	3	0	0	0	0	0		1	0	0	0	0	0	0	0	0	0	0	0	0
2	2015-02-27 11:56:08	2015-02-27 17:35:25	2015-02-27	359000000000000	Valens	Mvera mission	Vg24	19	3	5	2	35	1	2	3	1		6	5	2	13	3	0	0	0	0	0		1	0	0	0	0	0	0	0	0	0	0	0	0
2	2015-02-27 11:59:44	2015-02-27 19:20:29	2015-02-27	359000000000000	Phonex	Mvera mission	Vg41	24	1	1	1	37	1	1	3	4		2	2	0	4	3	0	0	0	0	0		1	0	0	0	0	0	0	0	0	0	0	0	0
2	2015-02-27 12:11:09	2015-02-27 17:36:55	2015-02-27	359000000000000	Valens	Mvera mission	Vg24	19	1	1	1	70	1	1	2	1		6	5	2	13	3	0	0	0	0	0		1	0	0	0	0	0	0	0	0	0	0	0	0
2	2015-02-27 12:22:56	2015-02-27 17:37:35	2015-02-27	359000000000000	Valens	Mvera mission	Vg24	19	2	3	2	65	1	1	2	1		6	5	2	13	3	0	0	0	0	0		1	0	0	0	0	0	0	0	0	0	0	0	0
2	2015-02-27 12:25:30	2015-02-27 19:00:00	2015-02-27	360000000000000	Eddah	Mvera Mission	Vg21	43	1	1	1	59	1	1	2	4		2	1	2	5	3	0	0	0	0	0		1	0	0	0	0	0	0	0	0	0	0	0	0
2	2015-02-27 12:27:11	2015-02-27 19:12:49	2015-02-27	356000000000000	Maureen	Mvera mission	Vg60	21	1	1	1	44	1	1	2	1		4	1	1	6	3	0	0	0	0	0		1	0	0	0	0	0	0	0	0	0	0	0	0
2	2015-02-27 12:33:15	2015-02-27 19:13:04	2015-02-27	356000000000000	Maureen	Mvera mission	Vg60	21	2	3	2	28	1	1	2	1		4	1	1	6	3	0	0	0	0	0		1	0	0	0	0	0	0	0	0	0	0	0	0
2	2015-02-27 12:33:39	2015-02-27 19:00:28	2015-02-27	360000000000000	Eddah	Mvera Mission	Vg21	43	2	3	2	57	1	1	1	2		2	1	2	5	3	0	0	0	0	0		1	0	0	0	0	0	0	0	0	0	0	0	0
2	2015-02-27 12:39:34	2015-02-27 18:04:47	2015-02-27	359000000000000	Gausi	Mvera mission	Vg49	6	1	1	1	47	1	1	2	4		2	2	1	5	3	0	0	0	0	0		1	0	0	0	0	0	0	0	0	0	0	0	0
2	2015-02-27 12:42:06	2015-02-27 19:20:39	2015-02-27	359000000000000	Phonex	Mvera mission	Vg41	24	2	3	2	29	1	1	2	4		2	2	0	4	3	0	0	0	0	0		1	0	0	0	0	0	0	0	0	0	0	0	0
2	2015-02-27 12:44:38	2015-02-27 18:05:15	2015-02-27	359000000000000	Gausi	Mvera mission	Vg49	6	2	3	2	36	1	1	2	1		2	2	1	5	3	0	0	0	0	0		1	0	0	0	0	0	0	0	0	0	0	0	0
2	2015-02-27 12:49:46	2015-02-27 18:06:00	2015-02-27	359000000000000	Gausi	Mvera mission	Vg49	6	3	5	1	15	1	4	2	5		2	2	1	5	3	0	0	0	0	0		1	0	0	0	0	0	0	0	0	0	0	0	0
2	2015-02-27 12:55:33	2015-02-27 18:20:33	2015-02-27	360000000000000	Patrick	Mvera Mission	Vg57	21	1	1	2	61	1	3	3	1		0	1	1	2	3	0	0	0	0	0		1	0	0	0	0	0	0	0	0	0	0	0	0
2	2015-02-27 13:08:13	2015-02-27 19:02:30	2015-02-27	360000000000000	Eddah	Mvera Mission	Vg21	6	1	1	1	34	1	1	2	4		1	2	0	3	3	0	0	0	0	0		1	0	0	0	0	0	0	0	0	0	0	0	0
2	2015-02-27 13:13:18	2015-02-27 19:02:51	2015-02-27	360000000000000	Eddah	Mvera Mission	Vg21	6	2	3	2	32	1	1	3	2		1	2	0	3	3	0	0	0	0	0		1	0	0	0	0	0	0	0	0	0	0	0	0
2	2015-02-27 13:14:23	2015-02-27 17:39:53	2015-02-27	359000000000000	Valens	Mvera mission	Vg24	9	2	3	2	57	1	1	2	3		0	4	2	6	3	0	0	0	0	0		1	0	0	0	0	0	0	0	0	0	0	0	0
2	2015-02-27 13:18:34	2015-02-27 19:25:48	2015-02-27	356000000000000	Halima	Mvera mission	Vg36	8	1	1	1	24	1	1	2	1		3	2	0	5	3	0	0	0	0	0		1	0	0	0	0	0	0	0	0	0	0	0	0
2	2015-02-27 13:23:17	2015-02-27 19:26:00	2015-02-27	356000000000000	Halima	Mvera mission	Vg36	8	2	3	2	25	1	1	2	1		3	2	0	5	3	0	0	0	0	0		1	0	0	0	0	0	0	0	0	0	0	0	0
2	2015-02-27 13:24:42	2015-02-27 17:40:27	2015-02-27	359000000000000	Valens	Mvera mission	Vg24	9	1	1	1	67	1	1	2	3		0	4	2	6	3	0	1	0	1	0		1	0	0	0	0	0	0	0	0	0	0	0	0
2	2015-02-27 13:33:57	2015-02-27 19:04:51	2015-02-27	360000000000000	Eddah	Mvera Mission	Vg21	12	1	1	2	50	1	1	3	2		1	1	1	3	3	0	0	0	0	0		1	0	0	0	0	0	0	0	0	0	0	0	0
2	2015-02-27 13:35:54	2015-02-27 19:20:56	2015-02-27	359000000000000	Phonex	Mvera mission	Vg41	28	2	1	2	27	1	1	2	4		4	2	0	6	3	0	0	0	0	0		1	0	0	0	0	0	0	0	0	0	0	0	0
2	2015-02-27 13:39:20	2015-02-27 17:40:52	2015-02-27	359000000000000	Valens	Mvera mission	Vg24	9	4	5	2	19	1	4	3	5		0	4	2	6	3	0	0	0	0	0		1	0	0	0	0	0	0	0	0	0	0	0	0
2	2015-02-27 13:46:01	2015-02-27 17:41:15	2015-02-27	359000000000000	Valens	Mvera mission	Vg24	9	6	5	2	15	1	4	2	5		0	4	2	6	3	0	0	0	0	0		1	0	0	0	0	0	0	0	0	0	0	0	0
2	2015-02-27 14:32:17	2015-02-27 17:43:39	2015-02-27	359000000000000	Valens	Mvera mission	Vg24	30	1	1	1	38	1	1	3	4		2	3	0	5	3	0	0	0	0	0		1	0	0	0	0	0	0	0	0	0	0	0	0
2	2015-02-27 14:47:08	2015-02-27 14:55:58	2015-02-27	359000000000000	Valens	Mvera mission	Vg24	26	1	1	1	43	1	1	2	4		2	4	1	7	3	0	0	0	0	0		1	0	0	0	0	0	0	0	0	0	0	0	0
2	2015-02-27 14:53:22	2015-02-27 19:05:44	2015-02-27	360000000000000	Eddah	Mvera Mission	Vg57	14	1	1	1	51	1	1	1	1		3	2	2	7	3	0	0	0	0	0		1	0	0	0	0	0	0	0	0	0	0	0	0
2	2015-02-27 14:56:07	2015-02-27 17:44:55	2015-02-27	359000000000000	Valens	Mvera mission	Vg24	26	4	5	1	18	1	4	3	5		2	4	1	7	3	0	0	0	0	0		1	0	0	0	0	0	0	0	0	0	0	0	0
2	2015-02-27 14:56:44	2015-02-27 19:27:18	2015-02-27	356000000000000	Halima	Mvera mission	Vg30	7	1	1	1	26	1	1	4	4		2	3	0	5	2	0	0	0	0	0		1	0	0	0	0	0	0	0	0	0	0	0	0
2	2015-02-27 14:59:33	2015-02-27 19:06:06	2015-02-27	360000000000000	Eddah	Mvera Mission	Vg57	14	2	3	2	47	1	1	1	1		3	2	2	7	3	0	0	0	0	0		1	0	0	0	0	0	0	0	0	0	0	0	0
2	2015-02-27 15:04:06	2015-02-27 19:06:40	2015-02-27	360000000000000	Eddah	Mvera Mission	Vg57	14	4	5	1	19	1	4	1	1		3	2	2	7	3	0	0	0	0	0		1	0	0	0	0	0	0	0	0	0	0	0	0
2	2015-02-27 15:08:07	2015-02-27 19:30:39	2015-02-27	359000000000000	Alex	Mvera mission	Vg2	12	1	3	2	32	1	2	2	1		1	2	0	3	3	0	0	0	0	0		1	0	0	0	0	0	0	0	0	0	0	1	0		media\1425043269771.jpg
2	2015-02-27 15:09:07	2015-02-27 19:18:30	2015-02-27	359000000000000	Collins	Mvera mission	Vg12	10	2	1	1	32	1	1	2	2		0	2	0	2	3	0	0	0	0	0		1	0	0	0	0	0	0	0	0	0	0	0	0
2	2015-02-27 15:10:14	2015-02-27 19:07:00	2015-02-27	360000000000000	Eddah	Mvera Mission	Vg57	14	3	5	2	16	1	4	2	5		3	2	2	7	3	0	0	0	0	0		1	0	0	0	0	0	0	0	0	0	0	0	0
2	2015-02-27 15:11:08	2015-02-27 19:14:29	2015-02-27	356000000000000	Maureen	Mvera mission	Vg46	23	1	1	1	54	1	1	2	2		1	0	2	3	3	0	0	0	0	0		1	0	0	0	0	0	0	0	0	0	0	0	0
2	2015-02-27 15:14:38	2015-02-27 19:27:48	2015-02-27	356000000000000	Halima	Mvera mission	Vg30	5	2	3	2	49	1	1	3	4		0	2	2	4	3	0	0	0	0	0		1	0	0	0	0	0	0	0	0	0	0	0	0
2	2015-02-27 15:21:26	2015-02-27 19:30:50	2015-02-27	359000000000000	Alex	Mvera mission	Vg2	12	2	5	1	15	1	4	2	5		1	2	0	3	3	0	0	0	0	0		1	0	0	0	0	0	0	0	0	0	0	1	0		media\1425043495563.jpg
2	2015-02-27 15:22:55	2015-02-27 19:18:48	2015-02-27	359000000000000	Collins	Mvera mission	Vg12	1	2	1	1	74	1	1	2	1		3	0	2	5	3	0	0	0	0	0		1	0	0	0	0	0	0	0	0	0	0	0	0
2	2015-02-27 15:26:45	2015-02-27 19:14:48	2015-02-27	356000000000000	Maureen	Mvera mission	Vg45	23	7	1	1	35	1	1	2	1		3	4	0	7	3	0	0	0	0	0		1	0	0	0	0	0	0	0	0	0	0	0	0
2	2015-02-27 15:52:03	2015-02-27 19:21:43	2015-02-27	359000000000000	Phonex	Mvera mission	Vg27	20	1	1	1	25	1	1	2	2		2	2	0	4	3	0	1	1	1	0		1	0	0	0	0	0	0	0	0	0	0	0	0
2	2015-02-27 15:54:29	2015-02-27 19:28:34	2015-02-27	356000000000000	Halima	Mvera mission	Vg36	13	1	3	2	36	1	1	1	1		3	4	0	7	3	0	0	0	0	0		1	0	0	0	0	0	0	0	0	0	0	0	0
2	2015-02-27 15:59:29	2015-02-27 19:29:11	2015-02-27	356000000000000	Halima	Mvera mission	Vg36	10	1	1	1	72	1	1	2	1		4	2	2	8	3	0	0	0	0	0		1	0	0	0	0	0	0	0	0	0	0	0	0
2	2015-02-27 16:08:26	2015-02-27 19:21:55	2015-02-27	359000000000000	Phonex	Mvera mission	Vg27	20	2	3	2	20	1	1	2	2		2	2	0	4	3	0	0	0	0	0		1	0	0	0	0	0	0	0	0	0	0	0	0
2	2015-02-27 16:11:02	2015-02-27 19:29:23	2015-02-27	356000000000000	Halima	Mvera mission	Vg36	10	2	3	2	62	1	1	1	1		4	2	2	8	3	0	0	0	0	0		1	0	0	0	0	0	0	0	0	0	0	0	0
2	2015-02-27 16:23:00	2015-02-27 19:30:02	2015-02-27	356000000000000	Halima	Mvera mission	Vg36	7	1	1	1	30	1	1	2	1		2	2	0	4	3	0	0	0	0	0		1	0	0	0	0	0	0	0	0	0	0	0	0
2	2015-02-27 16:27:22	2015-02-27 19:30:11	2015-02-27	356000000000000	Halima	Mvera mission	Vg36	7	2	3	2	25	1	1	3	1		2	2	0	4	3	0	0	0	0	0		1	0	0	0	0	0	0	0	0	0	0	0	0
2	2015-02-27 16:31:26	2015-02-27 18:12:37	2015-02-27	359000000000000	Gausi	Mvera mission	Vg34	20	1	1	2	67	1	2	1	1		0	0	1	1	3	0	0	0	0	0		1	0	0	0	0	0	0	0	0	0	0	0	0
2	2015-03-02 10:19:36	2015-03-03 06:41:23	2015-03-02	359000000000000	Phonex	Khuwi	Vg161	5	2	3	2	62	1	1	2	1		2	0	2	4	3	0	0	0	0	0		1	0	0	0	0	0	0	0	0	0	0	0	0
2	2015-03-02 10:29:58	2015-03-03 06:41:50	2015-03-02	359000000000000	Phonex	Khuwi	Vg161	5	1	1	1	70	1	1	2	1		2	0	2	4	3	0	0	0	0	0		1	0	0	0	0	0	0	0	0	0	0	0	0
2	2015-03-02 10:31:57	2015-03-03 05:47:10	2015-03-02	360000000000000	Eddah	Khuwi	Vg11	30	1	1	1	64	1	1	3	1		0	3	2	5	3	0	0	0	0	0		1	0	0	0	0	0	0	0	0	0	0	0	0
2	2015-03-02 10:36:36	2015-03-03 07:20:36	2015-03-02	359000000000000	Gausi	Khuwi	Vg106	7	2	3	2	17	1	1	2	1		0	2	0	2	3	0	0	0	0	0		1	0	0	0	0	0	0	0	0	0	0	0	0
2	2015-03-02 10:41:19	2015-03-03 06:43:13	2015-03-02	359000000000000	Phonex	Khuwi	Vg161	3	2	3	2	30	1	1	2	1		0	2	0	2	3	0	0	0	0	0		1	0	0	0	0	0	0	0	0	0	0	0	0
2	2015-03-02 10:52:27	2015-03-03 06:03:09	2015-03-02	360000000000000	Patrick	Khuwi	Vg121	16	1	1	1	51	1	1	2	1		4	1	2	7	3	0	1	1	0	0		1	0	0	0	0	0	0	0	0	0	0	0	0
2	2015-03-02 10:57:50	2015-03-03 07:24:11	2015-03-02	359000000000000	Gausi	Khuwi	Vg106	15	2	3	2	44	1	1	1	1		3	1	2	6	3	0	0	0	0	0		1	0	0	0	0	0	0	0	0	0	0	0	0
2	2015-03-02 10:59:09	2015-03-03 06:03:26	2015-03-02	360000000000000	Patrick	Khuwi	Vg121	16	2	3	2	45	1	1	2	1		4	1	2	7	3	0	0	0	0	0		1	0	0	0	0	0	0	0	0	0	0	0	0
2	2015-03-02 11:00:31	2015-03-03 06:44:31	2015-03-02	359000000000000	Phonex	Khuwi	Vg161	1	2	3	2	35	1	1	2	1		3	2	1	6	3	0	0	1	1	0		1	0	0	0	1	0	0	0	0	0	0	1	0		media\1425287446572.jpg
2	2015-03-02 11:01:30	2015-03-03 06:04:01	2015-03-02	360000000000000	Patrick	Khuwi	Vg121	16	3	5	2	17	1	4	2	1		4	1	2	7	3	0	0	0	0	0		1	0	0	0	0	0	0	0	0	0	0	0	0
2	2015-03-02 11:08:44	2015-03-03 05:48:06	2015-03-02	360000000000000	Eddah	Khuwi	Vg11	30	3	5	2	19	1	4	3	5		0	3	2	5	3	0	0	0	0	0		1	0	0	0	0	0	0	0	0	0	0	0	0
2	2015-03-02 11:10:30	2015-03-02 17:58:31	2015-03-02	359000000000000	Collins	Mvera mission	Vg29	11	1	1	1	27	1	4	3	4		0	1	0	1	5	0	0	0	0	0		1	0	0	0	0	0	0	0	0	0	0	0	0
2	2015-03-02 11:12:18	2015-03-03 05:48:34	2015-03-02	360000000000000	Eddah	Khuwi	Vg11	30	5	6	1	15	1	4	2	5		0	3	2	5	3	0	0	0	0	0		1	0	0	0	0	0	0	0	0	0	0	0	0
2	2015-03-02 11:15:15	2015-03-03 06:44:47	2015-03-02	359000000000000	Phonex	Khuwi	Vg161	1	1	1	1	43	1	1	2	1		3	2	1	6	3	0	0	0	0	0		1	0	0	0	0	0	0	0	0	0	0	0	0
2	2015-03-02 11:18:25	2015-03-03 07:26:32	2015-03-02	359000000000000	Gausi	Khuwi	Vg106	13	1	1	1	29	1	1	2	1		2	2	0	4	3	0	0	0	0	0		1	0	0	0	0	1	0	0	0	0	0	1	0		media\1425288112915.jpg
2	2015-03-02 11:19:33	2015-03-02 18:02:48	2015-03-02	359000000000000	Valens	Mvera mission	Vg34	15	3	3	2	38	1	1	2	1		3	2	2	7	3	0	0	0	0	0		1	0	0	0	0	0	0	0	0	0	0	0	0
2	2015-03-02 11:19:51	2015-03-02 17:56:22	2015-03-02	356000000000000	Halima	Mvera mission	Vg36	11	1	3	2	20	1	1	1	1		1	2	0	3	3	0	0	0	0	0		1	0	0	0	0	0	0	0	0	0	0	0	0
2	2015-03-02 11:23:16	2015-03-03 06:04:47	2015-03-02	360000000000000	Patrick	Khuwi	Vg121	5	2	3	2	24	1	1	2	1		2	3	0	5	3	0	0	0	0	0		1	0	0	0	0	0	0	0	0	0	0	0	0
2	2015-03-02 11:23:37	2015-03-03 07:27:24	2015-03-02	359000000000000	Gausi	Khuwi	Vg106	13	2	3	2	26	1	1	1	1		2	2	0	4	3	0	0	0	0	0		1	0	0	0	0	1	0	0	0	0	0	1	0		media\1425288489360.jpg
2	2015-03-02 11:26:16	2015-03-02 17:56:47	2015-03-02	356000000000000	Halima	Mvera mission	Vg36	11	2	1	1	23	1	1	2	1		1	2	0	3	3	0	0	0	0	0		1	0	0	0	0	0	0	0	0	0	0	0	0
2	2015-03-02 11:36:18	2015-03-03 06:46:11	2015-03-02	359000000000000	Phonex	Khuwi	Vg161	19	1	1	1	65	1	1	2	1		0	0	2	2	3	0	0	0	0	0		1	0	0	0	0	0	0	0	0	0	0	0	0
2	2015-03-02 11:37:48	2015-03-05 16:13:03	2015-03-02	359000000000000	Collins	Mvera mission	Vg29	5	2	1	1	30	1	1	4	4		1	3	0	4	5	0	0	0	0	0		1	0	0	0	0	0	0	0	0	0	0	0	0
2	2015-03-02 11:46:54	2015-03-03 06:05:52	2015-03-02	360000000000000	Patrick	Khuwi	Vg121	3	1	1	1	30	1	1	2	1		2	2	0	4	3	0	0	0	0	0		1	0	0	0	0	0	0	0	0	0	0	0	0
2	2015-03-02 11:48:36	2015-03-03 07:31:31	2015-03-02	359000000000000	Gausi	Khuwi	Vg106	8	2	3	2	26	1	1	1	1		3	2	0	5	3	0	0	0	0	0		1	0	0	0	0	0	0	0	0	0	0	0	0
2	2015-03-02 11:51:21	2015-03-03 06:06:20	2015-03-02	360000000000000	Patrick	Khuwi	Vg121	3	2	3	2	25	1	1	2	1		2	2	0	4	3	0	0	0	0	0		1	0	0	0	0	0	0	0	0	0	0	0	0
2	2015-03-02 11:54:52	2015-03-02 18:03:46	2015-03-02	359000000000000	Valens	Mvera mission	Vg34	10	2	6	2	78	1	2	2	1		3	3	3	9	3	0	0	0	0	0		1	0	0	0	0	0	0	0	0	0	0	0	0
2	2015-03-02 12:07:32	2015-03-03 07:31:51	2015-03-02	359000000000000	Gausi	Khuwi	Vg106	2	1	1	1	46	1	1	2	1		4	1	1	6	3	0	0	0	0	0		1	0	0	0	0	1	0	0	0	0	0	1	0		media\1425291107244.jpg
2	2015-03-02 12:07:54	2015-03-03 06:47:15	2015-03-02	359000000000000	Phonex	Khuwi	Vg161	14	2	3	2	24	1	1	2	3		1	2	0	3	3	0	0	0	0	0		1	0	0	0	0	0	0	0	0	0	0	0	0
2	2015-03-02 12:12:40	2015-03-03 06:06:51	2015-03-02	360000000000000	Patrick	Khuwi	Vg121	1	2	4	2	52	1	2	2	1		3	2	1	6	3	0	0	0	0	0		1	0	0	0	0	0	0	0	0	0	0	0	0
2	2015-03-02 12:13:00	2015-03-03 07:32:14	2015-03-02	359000000000000	Gausi	Khuwi	Vg106	2	2	3	2	39	1	1	1	1		4	1	1	6	3	0	0	0	0	0		1	0	0	0	0	0	0	0	0	0	0	0	0
2	2015-03-02 12:15:01	2015-03-03 05:50:32	2015-03-02	360000000000000	Eddah	Khuwi	Vg11	25	2	3	2	54	1	1	1	1		0	1	2	3	3	0	0	0	0	0		1	0	0	0	0	0	0	0	0	0	0	0	0
2	2015-03-02 12:21:45	2015-03-03 06:07:30	2015-03-02	360000000000000	Patrick	Khuwi	Vg121	1	1	1	1	38	1	1	3	1		3	2	1	6	3	0	0	0	0	0		1	0	0	0	0	0	0	0	0	0	0	0	0
2	2015-03-02 12:27:56	2015-03-03 06:47:46	2015-03-02	359000000000000	Phonex	Khuwi	Vg162	6	2	3	2	26	1	1	2	1		2	2	0	4	3	0	0	0	0	0		1	0	0	0	0	0	0	0	0	0	0	0	0
2	2015-03-02 12:33:06	2015-03-03 07:32:43	2015-03-02	359000000000000	Gausi	Khuwi	Vg106	6	1	1	1	70	1	1	1	1		1	1	2	4	3	0	0	0	0	0		1	0	0	0	0	0	0	0	0	0	0	0	0
2	2015-03-02 12:36:11	2015-03-03 05:51:51	2015-03-02	360000000000000	Eddah	Khuwi	Vg11	22	1	1	2	76	1	3	1	1		0	0	1	1	3	0	0	0	0	0		1	0	0	0	0	0	0	0	0	0	0	0	0
2	2015-03-02 12:54:15	2015-03-03 06:07:57	2015-03-02	360000000000000	Patrick	Khuwi	Vg121	31	1	1	1	27	1	1	2	1		2	2	2	6	3	0	0	0	0	0		1	0	0	0	0	0	0	0	0	0	0	0	0
2	2015-03-02 12:59:06	2015-03-03 06:08:10	2015-03-02	360000000000000	Patrick	Khuwi	Vg121	31	2	4	1	96	1	1	2	1		2	2	2	6	3	0	0	0	0	0		1	0	0	0	0	0	0	0	0	0	0	0	0
2	2015-03-02 13:09:49	2015-03-03 06:08:41	2015-03-02	360000000000000	Patrick	Khuwi	Vg121	31	4	3	2	24	1	1	3	1		2	2	2	6	3	0	0	0	0	0		1	0	0	0	0	0	0	0	0	0	0	0	0
2	2015-03-02 13:26:41	2015-03-03 06:48:56	2015-03-02	359000000000000	Phonex	Khuwi	Vg162	7	2	3	2	16	1	1	2	1		0	2	0	2	3	0	0	0	0	0		1	0	0	0	0	0	0	0	0	0	0	0	0
2	2015-03-02 13:28:04	2015-03-03 06:31:21	2015-03-02	360000000000000	Saukila	Khuwi	Vg152	8	2	3	2	66	1	1	1	1		2	0	2	4	3	0	0	0	0	0		1	0	0	0	0	0	0	0	0	0	0	0	0
2	2015-03-02 13:33:36	2015-03-03 06:09:13	2015-03-02	360000000000000	Patrick	Khuwi	Vg121	9	1	1	1	57	1	1	2	1		3	5	2	10	3	0	0	0	0	0		1	0	0	0	0	0	0	0	0	0	0	0	0
2	2015-03-02 13:35:36	2015-03-02 18:04:16	2015-03-02	359000000000000	Valens	Mvera mission	Vg24	19	5	5	1	26	1	4	3	5		6	5	2	13	3	0	0	0	0	0		1	0	0	0	0	0	0	0	0	0	0	0	0
2	2015-03-02 13:39:06	2015-03-03 07:34:43	2015-03-02	359000000000000	Gausi	Khuwi	Vg106	5	2	3	2	42	1	1	1	1		4	2	2	8	3	0	0	0	0	0		1	0	0	0	0	0	0	0	0	0	0	0	0
2	2015-03-02 13:41:29	2015-03-03 06:49:11	2015-03-02	359000000000000	Phonex	Khuwi	Vg161	23	1	1	1	30	1	1	3	3		2	2	0	4	3	0	0	0	0	0		1	0	0	0	0	0	0	0	0	0	0	0	0
2	2015-03-02 13:41:56	2015-03-03 05:53:21	2015-03-02	360000000000000	Eddah	Khuwi	Vg11	44	1	1	1	58	1	1	1	1		2	2	2	6	3	0	0	0	0	0		1	0	0	0	0	0	0	0	0	0	0	0	0
2	2015-03-02 13:45:32	2015-03-03 06:31:55	2015-03-02	360000000000000	Saukila	Khuwi	Vg152	2	2	3	2	36	1	1	3	1		4	2	1	7	3	0	0	0	0	0		1	0	0	0	0	0	0	0	0	0	0	0	0
2	2015-03-02 13:51:50	2015-03-03 05:53:35	2015-03-02	360000000000000	Eddah	Khuwi	Vg11	44	2	3	2	55	1	1	1	1		2	2	2	6	3	0	0	0	0	0		1	0	0	0	0	0	0	0	0	0	0	0	0
2	2015-03-02 13:55:19	2015-03-03 05:53:47	2015-03-02	360000000000000	Eddah	Khuwi	Vg11	44	3	5	2	20	1	4	1	5		2	2	2	6	3	0	0	0	0	0		1	0	0	0	0	0	0	0	0	0	0	0	0
2	2015-03-02 13:57:40	2015-03-03 06:09:54	2015-03-02	360000000000000	Patrick	Khuwi	Vg121	9	4	5	1	25	1	4	3	1		3	5	2	10	3	0	0	0	0	0		1	0	0	0	0	0	0	0	0	0	0	0	0
2	2015-03-02 13:59:21	2015-03-03 05:54:00	2015-03-02	360000000000000	Eddah	Khuwi	Vg11	44	4	6	2	15	1	4	1	5		2	2	2	6	3	0	0	0	0	0		1	0	0	0	0	0	0	0	0	0	0	0	0
2	2015-03-02 14:04:13	2015-03-03 06:34:11	2015-03-02	360000000000000	Saukila	Khuwi	Vg152	33	2	3	2	24	1	1	2	1		2	2	0	4	3	0	0	0	0	0		1	0	0	0	0	0	0	0	0	0	0	0	0
2	2015-03-02 14:21:56	2015-03-03 06:35:14	2015-03-02	360000000000000	Saukila	Khuwi	Vg152	22	2	3	2	44	1	1	2	1		2	2	2	6	3	0	0	0	0	0		1	0	0	0	0	0	0	0	0	0	0	0	0
2	2015-03-02 14:22:51	2015-03-03 05:54:57	2015-03-02	360000000000000	Eddah	Khuwi	Vg11	3	1	1	1	37	1	1	2	1		4	2	0	6	3	0	0	0	0	0		1	0	0	0	0	0	0	0	0	0	0	0	0
2	2015-03-02 14:26:23	2015-03-03 06:35:31	2015-03-02	360000000000000	Saukila	Khuwi	Vg152	22	1	1	1	51	1	1	2	1		2	2	2	6	3	0	0	0	0	0		1	0	0	0	0	0	0	0	0	0	0	0	0
2	2015-03-02 14:27:55	2015-03-03 05:55:15	2015-03-02	360000000000000	Eddah	Khuwi	Vg11	3	2	3	2	32	1	1	1	1		4	2	0	6	3	0	0	0	0	0		1	0	0	0	0	0	0	0	0	0	0	0	0
2	2015-03-02 14:28:48	2015-03-03 06:35:48	2015-03-02	360000000000000	Saukila	Khuwi	Vg152	22	3	5	1	19	1	4	1	1		2	2	2	6	3	0	0	0	0	0		1	0	0	0	0	0	0	0	0	0	0	0	0
2	2015-03-02 14:31:16	2015-03-03 06:36:05	2015-03-02	360000000000000	Saukila	Khuwi	Vg152	22	6	5	2	18	1	4	2	5		2	2	2	6	3	0	0	0	0	0		1	0	0	0	0	0	0	0	0	0	0	0	0
2	2015-03-02 14:34:18	2015-03-03 06:12:44	2015-03-02	360000000000000	Patrick	Khuwi	Vg121	30	2	3	2	23	1	1	2	2		3	2	0	5	3	0	0	0	0	0		1	0	0	0	0	0	0	0	0	0	0	0	0
2	2015-03-02 14:38:28	2015-03-03 06:12:59	2015-03-02	360000000000000	Patrick	Khuwi	Vg121	30	1	1	1	38	1	1	2	2		3	2	0	5	3	0	0	0	0	0		1	0	0	0	0	0	0	0	0	0	0	0	0
2	2015-03-02 14:46:45	2015-03-03 05:55:39	2015-03-02	360000000000000	Eddah	Khuwi	Vg11	8	2	3	2	60	1	1	2	1		1	0	2	3	3	0	0	0	0	0		1	0	0	0	0	0	0	0	0	0	0	0	0
2	2015-03-02 14:48:33	2015-03-03 06:13:25	2015-03-02	360000000000000	Patrick	Khuwi	Vg121	27	2	3	2	22	1	1	2	1		0	2	0	2	3	0	0	0	0	0		1	0	0	0	0	0	0	0	0	0	0	0	0
2	2015-03-02 14:49:35	2015-03-02 18:00:17	2015-03-02	359000000000000	Collins	Mvera mission	Vg12	12	7	3	2	37	1	1	2	1		4	3	1	8	3	0	0	0	0	0		1	0	0	0	0	0	0	0	0	0	0	0	0
2	2015-03-02 14:55:11	2015-03-02 17:57:09	2015-03-02	356000000000000	Halima	Mvera mission	Vg10	14	1	3	2	50	1	1	2	1		1	2	2	5	3	0	0	0	0	0		1	0	0	0	0	0	0	0	0	0	0	0	0
2	2015-03-02 15:03:54	2015-03-02 17:57:41	2015-03-02	356000000000000	Halima	Mvera mission	Vg10	14	2	1	1	58	1	1	2	1		1	2	2	5	3	0	0	0	0	0		1	0	0	0	0	0	0	0	0	0	0	0	0
2	2015-03-03 10:08:28	2015-03-03 17:02:48	2015-03-03	359000000000000	Valens	Chinkhwiri	Vg47	7	2	3	2	36	1	1	2	1		3	3	1	7	3	0	0	0	0	0		1	0	0	0	0	0	0	0	0	0	0	0	0
2	2015-03-03 10:16:06	2015-03-03 17:03:02	2015-03-03	359000000000000	Valens	Chinkhwiri	Vg47	7	4	5	1	16	1	4	2	5		3	3	1	7	3	0	0	0	0	0		1	0	0	0	0	0	0	0	0	0	0	0	0
2	2015-03-03 10:25:50	2015-03-03 16:34:57	2015-03-03	359000000000000	Gausi	Khuwi	Vg81	21	2	3	2	27	1	1	1	1		3	2	0	5	3	0	0	0	0	0		1	0	0	0	0	0	0	0	0	0	0	0	0
2	2015-03-03 10:31:21	2015-03-03 16:36:53	2015-03-03	356000000000000	Halima	Chinkhwiri	Vg9	18	1	3	2	30	1	1	2	1		4	2	0	6	3	0	0	0	0	0		1	0	0	0	0	0	0	0	0	0	0	0	0
2	2015-03-03 10:32:14	2015-03-03 15:57:23	2015-03-03	360000000000000	Patrick	Khuwi	Vg176	14	2	3	2	40	1	1	1	1		2	1	2	5	3	0	0	0	0	0		1	0	0	0	0	0	0	0	0	0	0	0	0
2	2015-03-03 10:35:44	2015-03-03 17:00:13	2015-03-03	360000000000000	Eddah	Khuwi	Vg168	12	2	3	2	22	1	1	2	1		1	2	0	3	3	0	0	0	0	0		1	0	0	0	0	0	0	0	0	0	0	0	0
2	2015-03-03 10:38:22	2015-03-03 16:16:43	2015-03-03	359000000000000	Collins	Chinkhwiri	Vg1	9	1	1	1	29	1	1	3	1		1	2	0	3	3	0	0	0	0	0		1	0	0	0	0	0	0	0	0	0	0	0	0
2	2015-03-03 10:50:27	2015-03-03 16:35:33	2015-03-03	359000000000000	Gausi	Khuwi	Vg81	40	1	1	1	38	1	1	3	1		5	2	0	7	3	0	0	0	0	0		1	0	0	0	0	0	0	0	0	0	0	0	0
2	2015-03-03 10:53:00	2015-03-03 16:37:18	2015-03-03	356000000000000	Halima	Chinkhwiri	Vg9	13	1	1	2	49	1	2	2	1		0	4	1	5	3	0	1	0	0	1	Chest pain	1	0	0	0	0	0	0	0	0	0	0	0	0
2	2015-03-03 10:55:12	2015-03-03 16:02:45	2015-03-03	359000000000000	Alex	Chinkhwiri	Vg7	8	2	3	2	34	1	1	2	1		4	2	0	6	3	0	0	0	0	0		1	0	0	0	0	0	0	0	0	0	0	0	0
2	2015-03-03 10:57:24	2015-03-03 16:35:48	2015-03-03	359000000000000	Gausi	Khuwi	Vg81	40	2	3	2	35	1	1	2	1		5	2	0	7	3	0	0	0	0	0		1	0	0	0	0	0	0	0	0	0	0	0	0
2	2015-03-03 10:58:18	2015-03-03 16:17:18	2015-03-03	359000000000000	Collins	Chinkhwiri	Vg1	17	2	5	1	21	1	4	2	1		2	2	1	5	3	0	0	0	0	0		1	0	0	0	0	0	0	0	0	0	0	0	0
2	2015-03-03 11:01:44	2015-03-03 17:03:59	2015-03-03	359000000000000	Valens	Chinkhwiri	Vg47	5	3	3	2	48	1	1	2	1		3	2	3	8	3	0	1	1	1	0		1	0	1	0	0	0	0	1	0	1	0	1	0		media\1425373952676.jpg	media\1425374013907.jpg	media\1425374052982.jpg
2	2015-03-03 11:06:32	2015-03-03 16:17:33	2015-03-03	359000000000000	Collins	Chinkhwiri	Vg1	9	2	3	2	24	1	1	3	1		1	2	0	3	3	0	0	0	0	0		1	0	0	0	0	0	0	0	0	0	0	0	0
2	2015-03-03 11:08:34	2015-03-03 16:37:34	2015-03-03	356000000000000	Halima	Chinkhwiri	Vg9	13	2	5	1	23	1	4	2	1		0	4	1	5	3	0	0	0	0	0		1	0	0	0	0	0	0	0	0	0	0	0	0
2	2015-03-03 11:10:55	2015-03-03 16:03:22	2015-03-03	359000000000000	Alex	Chinkhwiri	Vg7	12	1	3	2	20	1	1	2	1		1	2	0	3	3	0	0	0	0	0		1	0	0	0	0	0	0	0	0	0	0	1	0		media\1425374039872.jpg
2	2015-03-03 11:13:44	2015-03-03 16:03:55	2015-03-03	360000000000000	Patrick	Khuwi	Vg176	41	2	3	2	59	1	1	1	1		0	1	2	3	3	0	0	0	0	0		1	0	0	0	0	0	0	0	0	0	0	0	0
2	2015-03-03 11:17:10	2015-03-03 16:04:31	2015-03-03	360000000000000	Patrick	Khuwi	Vg176	41	3	5	1	26	1	4	3	1		0	1	2	3	3	0	0	0	0	0		1	0	0	0	0	0	0	0	0	0	0	0	0
2	2015-03-03 11:18:27	2015-03-03 16:38:07	2015-03-03	356000000000000	Halima	Chinkhwiri	Vg9	13	5	5	1	27	1	2	2	1		0	4	1	5	3	0	0	0	0	0		1	0	0	0	0	0	0	0	0	0	0	0	0
2	2015-03-03 11:18:55	2015-03-03 17:04:13	2015-03-03	359000000000000	Valens	Chinkhwiri	Vg47	5	2	4	2	68	1	1	2	1		3	2	3	8	3	0	0	0	0	0		1	0	0	0	0	0	0	0	0	0	0	0	0
2	2015-03-03 11:21:57	2015-03-03 17:03:02	2015-03-03	360000000000000	Eddah	Khuwi	Vg168	32	2	3	2	42	1	1	1	1		1	2	2	5	3	0	0	0	0	0		1	0	0	0	0	0	0	0	0	0	0	0	0
2	2015-03-03 11:22:23	2015-03-03 16:36:13	2015-03-03	359000000000000	Gausi	Khuwi	Vg81	27	1	1	1	74	1	1	2	1		0	0	2	2	3	0	0	0	0	0		1	0	0	0	0	0	0	0	0	0	0	0	0
2	2015-03-03 11:26:22	2015-03-03 16:17:56	2015-03-03	359000000000000	Collins	Chinkhwiri	Vg1	33	2	1	1	57	1	1	2	1		4	6	2	12	3	0	0	0	0	0		1	0	0	0	0	0	0	0	0	0	0	0	0
2	2015-03-03 11:26:41	2015-03-03 17:04:36	2015-03-03	359000000000000	Valens	Chinkhwiri	Vg47	5	1	4	1	73	1	1	1	1		3	2	3	8	3	0	0	0	0	0		1	0	0	0	0	0	0	0	0	0	0	0	0
2	2015-03-03 11:27:39	2015-03-03 17:03:37	2015-03-03	360000000000000	Eddah	Khuwi	Vg168	32	3	5	1	21	1	4	3	5		1	2	2	5	3	0	0	0	0	0		1	0	0	0	0	0	0	0	0	0	0	0	0
2	2015-03-03 11:27:45	2015-03-03 16:36:29	2015-03-03	359000000000000	Gausi	Khuwi	Vg81	27	2	3	2	69	1	1	1	1		0	0	2	2	3	0	0	0	0	0		1	0	0	0	0	0	0	0	0	0	0	0	0
2	2015-03-03 11:32:18	2015-03-03 16:38:52	2015-03-03	356000000000000	Halima	Chinkhwiri	Vg9	19	1	1	2	42	1	2	1	1		3	0	1	4	3	0	0	0	0	0		1	0	0	0	0	0	0	0	0	0	0	0	0
2	2015-03-03 11:32:22	2015-03-03 17:04:23	2015-03-03	360000000000000	Eddah	Khuwi	Vg168	32	4	5	2	17	1	4	3	5		1	2	2	5	3	0	0	0	0	0		1	0	0	0	0	0	0	0	0	0	0	0	0
2	2015-03-03 11:41:42	2015-03-03 16:18:22	2015-03-03	359000000000000	Collins	Chinkhwiri	Vg1	26	1	3	2	34	1	1	2	1		4	1	1	6	3	0	0	0	0	0		1	0	0	0	0	0	0	0	0	0	0	0	0
2	2015-03-03 11:43:08	2015-03-03 16:36:42	2015-03-03	359000000000000	Gausi	Khuwi	Vg81	39	1	1	1	65	1	1	2	1		1	1	2	4	3	0	0	0	0	0		1	0	0	0	0	0	0	0	0	0	0	1	0		media\1425376256316.jpg
2	2015-03-03 11:43:57	2015-03-03 16:58:08	2015-03-03	356000000000000	Maureen	Chinkhwiri	Vg54	1	2	3	2	29	1	1	2	1		3	2	0	5	3	0	0	0	0	0		1	0	0	0	0	0	0	0	0	0	0	0	0
2	2015-03-03 11:44:10	2015-03-03 17:05:54	2015-03-03	359000000000000	Valens	Chinkhwiri	Vg47	1	2	3	2	32	1	1	2	1		4	2	0	6	3	0	0	0	1	0		1	0	0	0	0	0	0	0	0	0	0	0	0
2	2015-03-03 11:46:40	2015-03-03 16:39:19	2015-03-03	356000000000000	Halima	Chinkhwiri	Vg9	6	2	1	1	36	1	1	1	1		3	3	1	7	3	0	0	0	0	0		1	0	0	0	0	0	0	0	0	0	0	0	0
2	2015-03-03 11:51:00	2015-03-03 16:18:38	2015-03-03	359000000000000	Collins	Chinkhwiri	Vg1	26	2	1	1	58	1	1	2	1		4	1	1	6	3	0	0	0	0	0		1	0	0	0	0	0	0	0	0	0	0	0	0
2	2015-03-03 11:51:33	2015-03-03 16:36:55	2015-03-03	359000000000000	Gausi	Khuwi	Vg81	39	2	3	2	59	1	1	1	1		1	1	2	4	3	0	0	0	0	0		1	0	0	0	0	0	0	0	0	0	0	0	0
2	2015-03-03 11:55:11	2015-03-03 16:37:10	2015-03-03	359000000000000	Gausi	Khuwi	Vg81	39	3	5	2	18	1	4	3	5		1	1	2	4	3	0	0	0	0	0		1	0	0	0	0	0	0	0	0	0	0	0	0
2	2015-03-03 11:55:18	2015-03-03 16:05:38	2015-03-03	359000000000000	Alex	Chinkhwiri	Vg7	17	1	1	2	79	1	3	2	1		1	1	1	3	3	0	0	0	0	0		1	0	0	0	0	0	0	0	0	0	0	0	0
2	2015-03-03 11:56:03	2015-03-03 16:58:19	2015-03-03	356000000000000	Maureen	Chinkhwiri	Vg54	1	1	1	1	30	1	1	2	2		3	2	0	5	3	0	0	0	0	0		1	0	0	0	0	0	0	0	0	0	0	0	0
2	2015-03-03 12:00:51	2015-03-03 16:05:56	2015-03-03	359000000000000	Alex	Chinkhwiri	Vg7	17	2	5	1	21	1	4	2	1		1	1	1	3	3	0	0	0	0	0		1	0	0	0	0	0	0	0	0	0	0	0	0
2	2015-03-03 12:04:34	2015-03-03 16:05:52	2015-03-03	360000000000000	Patrick	Khuwi	Vg176	6	2	6	2	17	1	4	2	1		0	1	1	2	3	0	0	0	0	0		1	0	0	0	0	0	0	0	0	0	0	0	0
2	2015-03-03 12:07:37	2015-03-03 16:39:45	2015-03-03	356000000000000	Halima	Chinkhwiri	Vg9	6	3	3	2	34	1	1	2	1		3	3	1	7	3	0	0	0	0	0		1	0	0	0	0	0	0	0	0	0	0	0	0
2	2015-03-03 12:10:58	2015-03-03 16:39:56	2015-03-03	356000000000000	Halima	Chinkhwiri	Vg9	6	4	5	2	15	1	4	2	5		3	3	1	7	3	0	0	0	0	0		1	0	0	0	0	0	0	0	0	0	0	0	0
2	2015-03-03 12:11:44	2015-03-03 16:19:26	2015-03-03	359000000000000	Collins	Chinkhwiri	Vg1	23	2	3	2	32	1	1	2	1		4	4	0	8	3	0	0	0	0	0		1	0	0	0	0	0	0	0	0	0	0	0	0
2	2015-03-03 12:15:21	2015-03-03 17:07:09	2015-03-03	359000000000000	Valens	Chinkhwiri	Vg47	22	2	3	2	28	1	1	2	1		3	2	1	6	3	0	0	0	0	0		1	0	0	0	0	0	0	0	0	0	0	0	0
2	2015-03-03 12:15:32	2015-03-03 17:05:30	2015-03-03	360000000000000	Eddah	Khuwi	Vg168	25	2	3	2	46	1	1	2	3		3	3	2	8	3	0	0	0	0	0		1	0	0	0	0	0	0	0	0	0	0	0	0
2	2015-03-03 12:16:55	2015-03-03 16:40:22	2015-03-03	356000000000000	Halima	Chinkhwiri	Vg9	5	1	3	2	20	1	1	2	1		1	2	0	3	3	0	0	0	0	1	Chest pain	1	0	0	0	0	0	0	0	0	0	0	0	0
2	2015-03-03 12:19:45	2015-03-03 16:12:05	2015-03-03	359000000000000	Alex	Chinkhwiri	Vg7	18	1	3	2	22	1	1	2	1		2	2	0	4	3	0	0	1	1	0		1	0	0	0	0	0	0	0	0	0	0	1	0		media\1425378316610.jpg
2	2015-03-03 12:20:44	2015-03-03 16:06:23	2015-03-03	360000000000000	Patrick	Khuwi	Vg176	9	1	1	2	34	1	2	2	1		4	1	0	5	3	0	0	0	0	0		1	0	0	0	0	0	0	0	0	0	0	0	0
2	2015-03-03 12:21:33	2015-03-03 16:19:54	2015-03-03	359000000000000	Collins	Chinkhwiri	Vg1	23	4	7	1	21	1	4	2	3		4	4	0	8	3	0	0	0	0	0		1	0	0	0	0	0	0	0	0	0	0	0	0
2	2015-03-03 12:25:04	2015-03-03 17:07:27	2015-03-03	359000000000000	Valens	Chinkhwiri	Vg47	22	6	4	2	71	1	2	2	1		3	2	1	6	3	0	0	0	0	0		1	0	0	0	0	0	0	0	0	0	0	0	0
2	2015-03-03 12:27:43	2015-03-03 16:38:06	2015-03-03	359000000000000	Gausi	Khuwi	Vg81	23	2	1	1	33	1	1	2	1		1	2	0	3	3	0	0	0	0	0		1	0	0	0	0	0	0	0	0	0	0	0	0
2	2015-03-03 12:31:42	2015-03-03 16:38:26	2015-03-03	359000000000000	Gausi	Khuwi	Vg81	23	1	3	2	20	1	1	2	1		1	2	0	3	3	0	0	0	0	0		1	0	0	0	0	0	0	0	0	0	0	0	0
2	2015-03-03 12:36:19	2015-03-03 16:20:40	2015-03-03	359000000000000	Collins	Chinkhwiri	Vg1	4	3	5	2	16	1	4	2	5		2	3	1	6	3	0	1	1	0	0		1	0	0	0	0	0	0	0	0	0	0	0	0
2	2015-03-03 12:39:08	2015-03-03 16:43:28	2015-03-03	356000000000000	Halima	Chinkhwiri	Vg9	28	1	1	1	40	1	1	3	1		6	4	2	12	3	0	0	0	0	0		1	0	0	0	0	0	0	0	0	0	0	0	0
2	2015-03-03 12:44:46	2015-03-03 16:21:37	2015-03-03	359000000000000	Collins	Chinkhwiri	Vg1	4	2	3	2	30	1	1	2	1		3	3	1	7	3	0	0	0	0	0		1	0	0	0	0	0	0	0	0	0	0	0	0
2	2015-03-03 12:48:17	2015-03-03 16:21:53	2015-03-03	359000000000000	Collins	Chinkhwiri	Vg1	4	6	5	1	17	1	4	2	1		3	3	1	7	3	0	0	0	0	0		1	0	0	0	0	0	0	0	0	0	0	0	0
2	2015-03-03 12:53:28	2015-03-03 16:43:45	2015-03-03	356000000000000	Halima	Chinkhwiri	Vg9	28	2	3	2	40	1	1	2	1		6	4	2	12	3	0	0	0	0	0		1	0	0	0	0	0	0	0	0	0	0	0	0
2	2015-03-03 12:55:24	2015-03-03 16:41:19	2015-03-03	359000000000000	Gausi	Khuwi	Vg81	15	1	1	1	67	1	1	2	1		3	2	2	7	3	0	0	0	0	0		1	0	0	0	0	0	0	0	0	0	0	0	0
2	2015-03-03 12:58:44	2015-03-03 16:44:26	2015-03-03	356000000000000	Halima	Chinkhwiri	Vg9	28	5	5	1	17	1	4	2	5		6	4	2	12	3	0	0	0	0	0		1	0	0	0	0	0	0	0	0	0	0	0	0
2	2015-03-03 12:59:45	2015-03-03 16:41:55	2015-03-03	359000000000000	Gausi	Khuwi	Vg81	15	2	3	2	65	1	1	2	1		3	2	2	7	3	0	0	0	0	0		1	0	0	0	0	0	0	0	0	0	0	0	0
2	2015-03-03 13:00:40	2015-03-03 16:06:37	2015-03-03	360000000000000	Patrick	Khuwi	Vg176	34	1	1	1	65	1	1	2	1		1	1	3	5	3	0	0	0	0	0		1	0	0	0	0	0	0	0	0	0	0	0	0
2	2015-03-03 13:03:54	2015-03-03 16:42:09	2015-03-03	359000000000000	Gausi	Khuwi	Vg81	15	3	5	2	20	1	2	2	1		3	2	2	7	3	0	0	0	0	0		1	0	0	0	0	0	0	0	0	0	0	0	0
2	2015-03-03 13:06:36	2015-03-03 17:37:09	2015-03-03	360000000000000	Saukila	Khuwi	Vg152	7	1	1	1	53	1	1	2	1		2	0	2	4	3	0	0	0	0	0		1	0	0	0	0	0	0	0	0	0	0	0	0
2	2015-03-03 13:06:41	2015-03-03 16:45:40	2015-03-03	356000000000000	Halima	Chinkhwiri	Vg9	28	3	5	2	24	1	2	2	1		6	4	2	12	3	0	0	0	0	0		1	0	0	0	0	0	0	0	0	0	0	0	0
2	2015-03-03 13:07:48	2015-03-03 16:42:26	2015-03-03	359000000000000	Gausi	Khuwi	Vg81	15	4	5	1	16	1	4	2	5		3	2	2	7	3	0	0	0	0	0		1	0	0	0	0	0	0	0	0	0	0	0	0
2	2015-03-03 13:10:11	2015-03-03 17:37:35	2015-03-03	360000000000000	Saukila	Khuwi	Vg152	7	2	3	2	43	1	1	1	1		2	0	2	4	3	0	0	0	0	0		1	0	0	0	0	0	0	0	0	0	0	0	0
2	2015-03-03 13:10:13	2015-03-03 16:46:03	2015-03-03	356000000000000	Halima	Chinkhwiri	Vg9	28	4	5	1	20	1	4	2	5		6	4	2	12	3	0	0	0	0	0		1	0	0	0	0	0	0	0	0	0	0	0	0
2	2015-03-03 13:11:33	2015-03-03 16:22:20	2015-03-03	359000000000000	Collins	Chinkhwiri	Vg1	13	1	1	1	48	1	1	2	1		4	3	3	10	3	0	0	0	0	0		1	0	0	0	0	0	0	0	0	0	0	0	0
2	2015-03-03 13:14:17	2015-03-03 16:22:36	2015-03-03	359000000000000	Collins	Chinkhwiri	Vg1	13	2	3	2	45	1	1	1	1		4	3	3	10	3	0	0	0	0	0		1	0	0	0	0	0	0	0	0	0	0	0	0
2	2015-03-03 13:16:27	2015-03-03 16:46:59	2015-03-03	356000000000000	Halima	Chinkhwiri	Vg9	26	1	1	1	43	1	1	1	1		3	4	1	8	3	0	0	0	0	0		1	0	0	0	0	0	0	0	0	0	0	0	0
2	2015-03-03 13:21:35	2015-03-03 17:38:46	2015-03-03	360000000000000	Saukila	Khuwi	Vg152	1	2	3	2	25	1	1	2	1		2	2	0	4	3	0	0	0	0	0		1	0	0	0	0	0	0	0	0	0	0	0	0
2	2015-03-03 13:25:01	2015-03-03 17:39:04	2015-03-03	360000000000000	Saukila	Khuwi	Vg152	1	1	1	1	29	1	1	2	1		2	2	0	4	3	0	0	0	0	0		1	0	0	0	0	0	0	0	0	0	0	0	0
2	2015-03-03 13:25:32	2015-03-03 17:01:53	2015-03-03	356000000000000	Maureen	Chinkhwiri	Vg54	18	2	3	2	37	1	1	2	2		3	3	1	7	3	0	0	0	0	0		1	0	0	0	0	0	0	0	0	0	0	0	0
2	2015-03-03 13:25:52	2015-03-03 16:47:38	2015-03-03	356000000000000	Halima	Chinkhwiri	Vg9	26	4	5	1	19	1	4	2	1		3	4	1	8	3	0	0	0	0	0		1	0	0	0	0	0	0	0	0	0	0	0	0
2	2015-03-03 13:28:18	2015-03-03 16:15:41	2015-03-03	359000000000000	Alex	Chinkhwiri	Vg7	11	1	3	2	21	1	1	2	1		1	2	0	3	3	0	0	0	0	0		1	0	0	0	0	0	0	0	0	0	0	0	0
2	2015-03-03 13:29:23	2015-03-03 16:50:03	2015-03-03	356000000000000	Halima	Chinkhwiri	Vg9	26	2	3	2	39	1	1	2	1		3	4	1	8	3	0	0	0	0	0		1	0	0	0	0	0	0	0	0	0	0	0	0
2	2015-03-03 13:33:38	2015-03-03 16:50:18	2015-03-03	356000000000000	Halima	Chinkhwiri	Vg9	26	3	5	1	21	1	4	2	1		3	4	1	8	3	0	0	0	0	0		1	0	0	0	0	0	0	0	0	0	0	0	0
2	2015-03-03 13:36:47	2015-03-03 16:50:39	2015-03-03	356000000000000	Halima	Chinkhwiri	Vg9	26	5	5	1	17	1	4	2	5		3	4	1	8	3	0	0	0	0	0		1	0	0	0	0	0	0	0	0	0	0	0	0
2	2015-03-03 13:37:14	2015-03-03 17:02:06	2015-03-03	356000000000000	Maureen	Chinkhwiri	Vg54	18	1	1	1	41	1	1	2	2		3	3	1	7	3	0	0	1	0	0		1	0	0	0	0	1	0	0	0	0	0	1	0		media\1425382891345.jpg
2	2015-03-03 13:39:50	2015-03-03 16:24:14	2015-03-03	359000000000000	Collins	Chinkhwiri	Vg1	17	3	1	2	40	1	2	2	2		2	2	1	5	3	0	0	0	0	0		1	0	0	0	0	1	0	0	0	0	0	1	0		media\1425382990809.jpg
2	2015-03-03 13:46:32	2015-03-03 17:16:06	2015-03-03	359000000000000	Valens	Chinkhwiri	Vg47	25	1	1	1	41	1	1	2	1		4	5	2	11	3	0	0	0	0	0		1	0	0	0	0	0	0	0	0	0	0	0	0
2	2015-03-03 13:50:19	2015-03-03 16:07:50	2015-03-03	360000000000000	Patrick	Khuwi	Vg176	36	3	5	2	17	1	4	2	1		3	3	1	7	3	0	0	0	0	0		1	0	0	0	0	0	0	0	0	0	0	0	0
2	2015-03-03 13:50:27	2015-03-03 16:51:03	2015-03-03	356000000000000	Halima	Chinkhwiri	Vg9	2	1	3	2	25	1	1	1	1		3	2	0	5	3	0	0	0	0	0		1	0	0	0	0	0	0	0	0	0	0	0	0
2	2015-03-03 13:53:55	2015-03-03 17:02:59	2015-03-03	356000000000000	Maureen	Chinkhwiri	Vg54	18	4	5	1	15	1	4	3	5		3	3	1	7	3	0	0	0	0	0		1	0	0	0	0	0	0	0	0	0	0	0	0
2	2015-03-03 13:56:23	2015-03-03 16:51:15	2015-03-03	356000000000000	Halima	Chinkhwiri	Vg9	2	2	1	1	35	1	1	2	1		3	2	0	5	3	0	0	0	0	0		1	0	0	0	0	0	0	0	0	0	0	0	0
2	2015-03-03 13:58:47	2015-03-03 16:44:51	2015-03-03	359000000000000	Gausi	Khuwi	Vg81	35	2	3	2	38	1	1	1	1		5	1	1	7	3	0	0	0	0	0		1	0	0	0	0	0	0	0	0	0	0	1	0		media\1425384060756.jpg
2	2015-03-03 14:01:11	2015-03-03 17:16:25	2015-03-03	359000000000000	Valens	Chinkhwiri	Vg47	25	2	3	2	39	1	1	2	1		4	5	2	11	3	0	0	0	0	0		1	0	0	0	0	0	0	0	0	0	0	0	0
2	2015-03-03 14:04:55	2015-03-03 17:16:48	2015-03-03	359000000000000	Valens	Chinkhwiri	Vg47	25	3	5	1	17	1	4	2	5		4	5	2	11	3	0	0	0	0	0		1	0	0	0	0	0	0	0	0	0	0	0	0
2	2015-03-03 14:13:17	2015-03-03 17:11:14	2015-03-03	360000000000000	Eddah	Khuwi	Vg168	33	2	3	2	42	1	1	1	1		2	2	2	6	3	0	0	0	0	0		1	0	0	0	0	0	0	0	0	0	0	0	0
2	2015-03-03 14:15:31	2015-03-03 17:03:44	2015-03-03	356000000000000	Maureen	Chinkhwiri	Vg54	20	1	1	1	48	1	1	2	2		4	1	1	6	3	0	0	0	0	0		1	0	0	0	0	1	0	0	0	0	0	1	0		media\1425385600071.jpg
2	2015-03-03 14:18:28	2015-03-03 17:11:36	2015-03-03	360000000000000	Eddah	Khuwi	Vg168	33	3	5	1	20	1	4	2	1		2	2	2	6	3	0	0	0	0	0		1	0	0	0	0	0	0	0	0	0	0	0	0
2	2015-03-03 14:20:19	2015-03-03 17:17:27	2015-03-03	359000000000000	Valens	Chinkhwiri	Vg25	25	10	7	1	23	1	2	1	3		4	5	2	11	3	0	0	0	0	0		1	0	0	0	0	0	0	0	0	0	0	0	0
2	2015-03-03 14:22:47	2015-03-03 16:08:18	2015-03-03	360000000000000	Patrick	Khuwi	Vg176	22	1	1	1	33	1	1	3	1		2	2	0	4	3	0	0	0	0	0		1	0	0	0	0	0	0	0	0	0	0	0	0
2	2015-03-03 14:25:30	2015-03-03 17:12:06	2015-03-03	360000000000000	Eddah	Khuwi	Vg168	33	4	5	2	16	1	4	2	5		2	2	2	6	3	0	0	0	0	0		1	0	0	0	0	0	0	0	0	0	0	0	0
2	2015-03-03 14:27:08	2015-03-03 17:03:59	2015-03-03	356000000000000	Maureen	Chinkhwiri	Vg54	20	2	3	2	35	1	1	2	2		4	1	1	6	3	0	0	0	0	0		1	0	0	0	0	0	0	0	0	1	0	0	0		media\1425385855073.jpg
2	2015-03-03 14:49:46	2015-03-03 17:04:45	2015-03-03	356000000000000	Maureen	Chinkhwiri	Vg54	9	2	3	2	22	1	1	1	1		3	4	0	7	3	0	0	0	0	0		1	0	0	0	0	0	0	0	0	0	0	0	0
2	2015-03-03 14:57:29	2015-03-03 17:05:08	2015-03-03	356000000000000	Maureen	Chinkhwiri	Vg54	9	3	3	2	23	1	1	2	2		3	4	0	7	3	0	0	0	0	0		1	0	0	0	0	0	0	0	0	0	0	0	0
2	2015-03-03 15:03:38	2015-03-03 17:05:23	2015-03-03	356000000000000	Maureen	Chinkhwiri	Vg54	9	4	5	2	15	1	4	2	5		3	4	0	7	3	0	0	0	0	0		1	0	0	0	0	0	0	0	0	0	0	0	0
2	2015-03-03 15:11:37	2015-03-03 17:13:34	2015-03-03	360000000000000	Eddah	Khuwi	Vg168	17	1	1	1	41	1	1	3	4		2	3	1	6	3	0	0	0	0	0		1	0	0	0	0	0	0	0	0	0	0	0	0
2	2015-03-03 15:21:14	2015-03-03 17:14:17	2015-03-03	360000000000000	Eddah	Khuwi	Vg168	17	2	3	2	38	1	1	1	1		2	3	1	6	3	0	0	0	0	0		1	0	0	0	0	0	0	0	0	0	0	0	0
2	2015-03-03 15:24:33	2015-03-03 17:14:42	2015-03-03	360000000000000	Eddah	Khuwi	Vg168	17	3	5	2	18	1	4	3	5		2	3	1	6	3	0	0	0	0	0		1	0	0	0	0	0	0	0	0	0	0	0	0
2	2015-03-03 15:26:31	2015-03-03 17:15:07	2015-03-03	360000000000000	Eddah	Khuwi	Vg168	17	4	5	1	15	1	4	2	5		2	3	1	6	3	0	0	0	0	0		1	0	0	0	0	0	0	0	0	0	0	0	0
2	2015-03-04 10:03:20	2015-03-04 16:50:20	2015-03-04	356000000000000	Halima	Chinkhwiri	Vg66	1	1	1	1	52	1	1	2	1		0	1	2	3	3	0	0	0	0	0		1	0	0	0	0	0	0	0	0	0	0	0	0
2	2015-03-04 10:12:39	2015-03-04 16:46:36	2015-03-04	360000000000000	Patrick	Khuwi	Vg217	45	2	3	2	32	1	1	3	1		2	1	1	4	3	0	0	0	0	0		1	0	0	0	0	0	0	0	0	0	0	0	0
2	2015-03-04 10:15:10	2015-03-04 16:50:54	2015-03-04	356000000000000	Halima	Chinkhwiri	Vg66	1	2	3	2	43	1	1	2	1		0	1	2	3	3	0	1	0	0	1	Chest pain	1	0	0	0	0	1	0	0	0	0	0	1	0		media\1425457453590.jpg
2	2015-03-04 10:17:48	2015-03-04 17:28:53	2015-03-04	359000000000000	Phonex	Chinkhwiri	Vg64	27	2	3	2	21	1	1	2	1		1	2	0	3	3	0	0	0	0	0		1	0	0	0	0	0	0	0	0	0	0	0	0
2	2015-03-04 10:25:13	2015-03-04 16:16:58	2015-03-04	359000000000000	Gausi	Khuwi	Vg204	60	1	1	2	60	1	3	1	1		1	3	1	5	3	0	0	0	0	0		1	0	0	0	0	0	0	0	0	0	0	0	0
2	2015-03-04 10:31:51	2015-03-04 16:17:11	2015-03-04	359000000000000	Gausi	Khuwi	Vg204	60	2	5	1	16	1	4	2	1		1	3	1	5	3	0	0	0	0	0		1	0	0	0	0	0	0	0	0	0	0	0	0
2	2015-03-04 10:33:35	2015-03-04 16:47:37	2015-03-04	360000000000000	Patrick	Khuwi	Vg217	36	2	3	2	47	1	1	2	1		0	0	2	2	3	0	0	0	0	0		1	0	0	0	0	0	0	0	0	0	0	0	0
2	2015-03-04 10:36:03	2015-03-04 17:04:39	2015-03-04	359000000000000	Alex	Chinkhwiri	Vg56	1	1	3	2	23	1	1	3	1		2	2	0	4	3	0	0	0	0	0		1	0	0	0	0	0	0	0	0	0	0	1	0		media\1425458418723.jpg
2	2015-03-04 10:36:35	2015-03-04 17:29:18	2015-03-04	359000000000000	Phonex	Chinkhwiri	Vg64	31	2	3	2	30	1	1	2	1		3	2	0	5	3	0	0	0	0	0		1	0	0	0	0	0	0	0	0	0	0	0	0
2	2015-03-04 10:37:53	2015-03-04 16:17:23	2015-03-04	359000000000000	Gausi	Khuwi	Vg204	60	4	5	2	19	1	4	3	1		1	3	1	5	3	0	0	0	0	0		1	0	0	0	0	0	0	0	0	0	0	0	0
2	2015-03-04 10:42:00	2015-03-04 16:17:35	2015-03-04	359000000000000	Gausi	Khuwi	Vg204	60	5	5	1	36	1	4	1	1		1	3	1	5	3	0	0	0	0	0		1	0	0	0	0	0	0	0	0	0	0	0	0
2	2015-03-04 10:43:51	2015-03-04 17:20:30	2015-03-04	356000000000000	Maureen	Chinkhwiri	Vg40	8	1	1	1	39	1	1	2	2		1	3	0	4	3	0	0	1	0	1	Chest tightness when walking on upland	1	0	0	0	0	0	0	0	0	0	0	0	0
2	2015-03-04 10:44:47	2015-03-04 16:48:10	2015-03-04	360000000000000	Patrick	Khuwi	Vg217	42	1	1	1	40	1	1	2	1		0	2	1	3	3	0	0	0	0	0		1	0	0	0	0	0	0	0	0	0	0	0	0
2	2015-03-04 10:53:37	2015-03-04 16:48:55	2015-03-04	360000000000000	Patrick	Khuwi	Vg217	42	2	3	2	38	1	1	3	1		0	2	1	3	3	0	0	0	0	0		1	0	0	0	0	0	0	0	0	0	0	0	0
2	2015-03-04 10:54:04	2015-03-04 17:20:58	2015-03-04	356000000000000	Maureen	Chinkhwiri	Vg40	8	2	3	2	35	1	1	2	1		1	3	0	4	3	0	0	1	1	0		1	0	0	0	0	1	0	0	0	0	0	1	0		media\1425459605244.jpg	media\1425459642809.jpg	media\1425459666379.jpg
2	2015-03-04 10:56:43	2015-03-04 16:17:55	2015-03-04	359000000000000	Gausi	Khuwi	Vg204	62	1	1	1	44	1	1	3	4		5	1	1	7	3	0	0	0	0	0		1	0	0	0	0	0	0	0	0	0	0	0	0
2	2015-03-04 11:01:43	2015-03-04 16:18:05	2015-03-04	359000000000000	Gausi	Khuwi	Vg204	62	2	3	2	38	1	1	2	2		5	1	1	7	3	0	0	0	0	0		1	0	0	0	0	0	0	0	0	0	0	0	0
2	2015-03-04 11:04:00	2015-03-04 17:29:57	2015-03-04	359000000000000	Phonex	Chinkhwiri	Vg64	7	2	3	2	29	1	1	2	1		3	2	0	5	3	0	0	0	0	0		1	0	0	0	0	0	0	0	0	0	0	0	0
2	2015-03-04 11:08:35	2015-03-04 16:45:51	2015-03-04	359000000000000	Collins	Chinkhwiri	Vg60	29	1	3	2	45	1	1	1	1		3	2	2	7	3	0	0	0	0	0		1	0	0	0	0	0	0	0	0	0	0	0	0
2	2015-03-04 11:14:52	2015-03-04 16:42:30	2015-03-04	359000000000000	Valens	Chinkhwiri	Vg60	15	2	3	2	37	1	1	2	1		4	2	1	7	3	0	0	0	0	0		1	0	0	0	0	0	0	0	0	0	0	0	0
2	2015-03-04 11:18:00	2015-03-04 17:06:01	2015-03-04	359000000000000	Alex	Chinkhwiri	Vg56	13	3	5	1	21	1	4	3	5		1	2	2	5	3	0	0	0	0	0		1	0	0	0	0	0	0	0	0	0	0	0	0
2	2015-03-04 11:20:21	2015-03-04 16:53:10	2015-03-04	356000000000000	Halima	Chinkhwiri	Vg66	18	2	2	1	39	1	1	2	4		1	2	1	4	3	0	0	0	0	0		1	0	0	0	0	0	0	0	0	0	0	0	0
2	2015-03-04 11:21:56	2015-03-04 16:53:35	2015-03-04	360000000000000	Patrick	Khuwi	Vg217	7	4	5	2	15	1	4	2	1		5	3	1	9	3	0	0	0	0	0		1	0	0	0	0	0	0	0	0	0	0	0	0
2	2015-03-04 11:24:24	2015-03-04 17:06:14	2015-03-04	359000000000000	Alex	Chinkhwiri	Vg56	13	5	6	2	16	1	4	2	5		1	2	2	5	3	0	0	0	0	0		1	0	0	0	0	0	0	0	0	0	0	0	0
2	2015-03-04 11:25:17	2015-03-04 16:53:46	2015-03-04	360000000000000	Patrick	Khuwi	Vg217	7	3	5	1	17	1	4	2	1		5	3	1	9	3	0	0	0	0	0		1	0	0	0	0	0	0	0	0	0	0	0	0
2	2015-03-04 11:26:14	2015-03-04 16:18:47	2015-03-04	359000000000000	Gausi	Khuwi	Vg204	51	1	1	1	43	1	1	2	1		5	1	1	7	3	0	0	0	0	0		1	0	0	0	0	0	0	0	0	0	0	1	0		media\1425461925480.jpg
2	2015-03-04 11:26:49	2015-03-04 17:30:50	2015-03-04	359000000000000	Phonex	Chinkhwiri	Vg64	3	1	1	1	50	1	1	2	1		3	1	2	6	3	0	0	0	0	0		1	0	0	0	0	0	0	0	0	0	0	0	0
2	2015-03-04 11:29:01	2015-03-04 16:54:00	2015-03-04	360000000000000	Patrick	Khuwi	Vg217	7	2	3	2	35	1	1	2	1		5	3	1	9	3	0	0	0	0	0		1	0	0	0	0	0	0	0	0	0	0	0	0
2	2015-03-04 11:29:13	2015-03-04 16:53:33	2015-03-04	356000000000000	Halima	Chinkhwiri	Vg66	18	3	3	2	37	1	1	2	1		1	2	1	4	3	0	0	0	0	0		1	0	0	0	0	0	0	0	0	0	0	0	0
2	2015-03-04 11:32:01	2015-03-04 16:54:12	2015-03-04	360000000000000	Patrick	Khuwi	Vg217	7	1	1	1	49	1	1	2	1		5	3	1	9	3	0	0	0	0	0		1	0	0	0	0	0	0	0	0	0	0	0	0
2	2015-03-04 11:33:03	2015-03-04 17:31:14	2015-03-04	359000000000000	Phonex	Chinkhwiri	Vg64	3	2	3	2	46	1	1	2	1		3	1	2	6	3	0	0	0	0	0		1	0	0	0	0	0	0	0	0	0	0	0	0
2	2015-03-04 11:33:46	2015-03-04 16:19:03	2015-03-04	359000000000000	Gausi	Khuwi	Vg204	51	2	3	2	32	1	1	2	1		5	1	1	7	3	0	0	0	0	0		1	0	0	0	0	0	0	0	0	0	0	0	0
2	2015-03-04 11:33:54	2015-03-04 17:22:31	2015-03-04	356000000000000	Maureen	Chinkhwiri	Vg40	11	1	1	1	28	1	1	2	1		2	3	0	5	3	0	0	0	0	0		1	0	0	0	0	0	0	0	0	0	0	0	0
2	2015-03-04 11:37:41	2015-03-04 17:22:51	2015-03-04	356000000000000	Maureen	Chinkhwiri	Vg40	11	2	3	2	23	1	1	2	1		2	3	0	5	3	0	0	0	0	0		1	0	0	0	0	0	0	0	0	0	0	0	0
2	2015-03-04 11:44:29	2015-03-04 16:46:38	2015-03-04	359000000000000	Collins	Chinkhwiri	Vg60	1	2	3	2	76	1	1	2	1		0	0	2	2	3	0	0	0	0	0		1	0	0	0	0	0	0	0	0	0	0	0	0
2	2015-03-04 11:45:29	2015-03-04 16:54:35	2015-03-04	360000000000000	Patrick	Khuwi	Vg217	9	1	1	2	62	1	3	2	1		1	1	1	3	3	0	0	0	0	0		1	0	0	0	0	0	0	0	0	0	0	0	0
2	2015-03-04 11:46:41	2015-03-04 17:23:46	2015-03-04	356000000000000	Maureen	Chinkhwiri	Vg40	17	2	1	2	39	1	1	1	2		4	2	1	7	3	0	0	1	0	0		1	0	0	0	0	0	0	0	0	0	0	1	0		media\1425463133985.jpg	media\1425463209582.jpg
2	2015-03-04 11:50:31	2015-03-04 16:43:10	2015-03-04	359000000000000	Valens	Chinkhwiri	Vg60	28	1	1	1	43	1	1	2	1		3	0	2	5	3	0	1	1	1	0		1	0	0	0	0	0	0	0	0	0	0	0	0
2	2015-03-04 11:53:06	2015-03-04 16:54:52	2015-03-04	360000000000000	Patrick	Khuwi	Vg217	9	2	5	1	18	1	4	3	1		1	1	1	3	3	0	0	0	0	0		1	0	0	0	0	0	0	0	0	0	0	0	0
2	2015-03-04 11:58:24	2015-03-04 16:43:22	2015-03-04	359000000000000	Valens	Chinkhwiri	Vg60	28	2	3	2	41	1	1	2	1		3	0	2	5	3	0	0	0	0	0		1	0	0	0	0	0	0	0	0	0	0	0	0
2	2015-03-04 12:00:31	2015-03-04 16:19:30	2015-03-04	359000000000000	Gausi	Khuwi	Vg204	35	1	1	1	26	1	1	2	1		2	2	0	4	3	0	0	0	0	0		1	0	0	0	0	0	0	0	0	0	0	0	0
2	2015-03-04 12:01:12	2015-03-04 17:23:38	2015-03-04	356000000000000	Maureen	Chinkhwiri	Vg40	17	1	2	1	46	1	1	2	1		4	2	1	7	3	0	0	0	0	0		1	0	0	0	0	0	0	0	0	0	0	0	0
2	2015-03-04 12:02:40	2015-03-04 16:57:44	2015-03-04	356000000000000	Halima	Chinkhwiri	Vg66	25	1	3	2	36	1	1	1	1		3	2	1	6	3	0	0	0	0	0		1	0	0	0	0	0	0	0	0	0	0	0	0
2	2015-03-04 12:04:56	2015-03-04 16:19:50	2015-03-04	359000000000000	Gausi	Khuwi	Vg204	35	2	3	2	25	1	1	2	1		2	2	0	4	3	0	0	0	0	0		1	0	0	0	0	0	0	0	0	0	0	0	0
2	2015-03-04 12:07:34	2015-03-04 16:47:04	2015-03-04	359000000000000	Collins	Chinkhwiri	Vg60	12	1	3	2	24	1	1	1	1		2	2	0	4	3	0	0	0	0	0		1	0	0	0	0	0	0	0	0	0	0	0	0
2	2015-03-04 12:16:55	2015-03-04 16:58:02	2015-03-04	356000000000000	Halima	Chinkhwiri	Vg66	25	3	5	2	17	1	4	2	1		3	2	1	6	3	0	0	0	0	0		1	0	0	0	0	0	0	0	0	0	0	0	0
2	2015-03-04 12:18:38	2015-03-04 17:24:35	2015-03-04	356000000000000	Maureen	Chinkhwiri	Vg40	15	2	3	2	24	1	1	2	1		1	4	1	6	3	0	0	0	0	0		1	0	0	0	0	0	0	0	0	0	0	0	0
2	2015-03-04 12:21:33	2015-03-04 17:24:58	2015-03-04	356000000000000	Maureen	Chinkhwiri	Vg40	15	1	1	1	28	1	1	2	2		1	4	1	6	3	0	0	0	0	0		1	0	0	0	0	0	0	0	0	0	0	0	0
2	2015-03-04 12:23:31	2015-03-04 16:48:33	2015-03-04	359000000000000	Collins	Chinkhwiri	Vg60	29	5	5	2	20	1	2	2	1		2	3	2	7	3	0	0	0	0	0		1	0	0	0	0	0	0	0	0	0	0	0	0
2	2015-03-04 12:23:55	2015-03-04 17:25:28	2015-03-04	356000000000000	Maureen	Chinkhwiri	Vg40	15	4	6	1	16	1	4	2	5		1	4	1	6	3	0	0	0	0	0		1	0	0	0	0	0	0	0	0	0	0	0	0
2	2015-03-04 12:26:07	2015-03-04 17:25:50	2015-03-04	356000000000000	Maureen	Chinkhwiri	Vg40	15	3	6	1	19	1	4	2	1		1	4	1	6	3	0	0	0	0	0		1	0	0	0	0	0	0	0	0	0	0	0	0
2	2015-03-04 12:27:33	2015-03-04 16:38:27	2015-03-04	360000000000000	Eddah	Khuwi	Vg168	12	2	3	2	53	1	1	1	1		0	2	2	4	3	0	0	0	0	0		1	0	0	0	0	0	0	0	0	0	0	0	0
2	2015-03-04 12:37:17	2015-03-04 16:38:44	2015-03-04	360000000000000	Eddah	Khuwi	Vg168	12	4	5	2	20	1	4	2	5		0	2	2	4	3	0	0	0	0	0		1	0	0	0	0	0	0	0	0	0	0	0	0
2	2015-03-04 12:41:02	2015-03-04 16:38:54	2015-03-04	360000000000000	Eddah	Khuwi	Vg168	12	3	5	1	31	1	4	1	3		0	2	2	4	3	0	0	0	0	0		1	0	0	0	0	0	0	0	0	0	0	0	0
2	2015-03-04 12:46:07	2015-03-04 16:20:13	2015-03-04	359000000000000	Gausi	Khuwi	Vg204	31	1	1	1	40	1	1	3	1		3	2	1	6	3	0	0	0	0	0		1	0	0	0	0	0	0	0	0	0	0	0	0
2	2015-03-04 12:49:47	2015-03-04 17:26:38	2015-03-04	356000000000000	Maureen	Chinkhwiri	Vg40	22	2	3	2	37	1	1	2	1		7	1	1	9	3	0	0	0	0	0		1	0	0	0	0	1	0	0	0	0	0	1	0		media\1425466388784.jpg	media\1425466423576.jpg
2	2015-03-04 12:55:44	2015-03-04 16:20:38	2015-03-04	359000000000000	Gausi	Khuwi	Vg204	31	3	5	1	16	1	4	2	5		3	2	1	6	3	0	0	0	0	0		1	0	0	0	0	0	0	0	0	0	0	0	0
2	2015-03-04 13:00:18	2015-03-04 17:10:12	2015-03-04	359000000000000	Alex	Chinkhwiri	Vg56	7	7	6	2	21	1	1	3	1		5	3	2	10	3	0	0	0	0	0		1	0	0	0	0	0	0	0	0	0	0	1	0		media\1425467031256.jpg
2	2015-03-04 13:05:38	2015-03-04 16:39:19	2015-03-04	360000000000000	Eddah	Khuwi	Vg168	19	1	1	1	44	1	1	2	1		1	3	2	6	3	0	0	0	0	0		1	0	0	0	0	0	0	0	0	0	0	0	0
2	2015-03-04 13:07:00	2015-03-04 17:10:49	2015-03-04	359000000000000	Alex	Chinkhwiri	Vg56	7	3	5	2	19	1	4	3	5		5	3	2	10	3	0	0	0	0	0		1	0	0	0	0	0	0	0	0	0	0	1	0		media\1425467407552.jpg
2	2015-03-04 13:08:59	2015-03-04 16:56:02	2015-03-04	360000000000000	Patrick	Khuwi	Vg217	15	1	1	1	65	1	1	2	1		0	0	2	2	3	0	1	1	0	0		1	0	0	0	0	0	0	0	0	0	0	0	0
2	2015-03-04 13:13:18	2015-03-04 16:59:55	2015-03-04	356000000000000	Halima	Chinkhwiri	Vg66	43	2	3	2	50	1	1	2	1		6	1	2	9	3	0	0	0	0	0		1	0	0	0	0	0	0	0	0	0	0	0	0
2	2015-03-04 13:23:53	2015-03-04 16:57:18	2015-03-04	360000000000000	Patrick	Khuwi	Vg217	15	2	3	2	62	1	1	2	1		0	0	2	2	3	0	1	1	0	0		1	0	0	0	0	0	0	0	0	0	0	0	0
2	2015-03-04 13:31:34	2015-03-04 17:01:06	2015-03-04	356000000000000	Halima	Chinkhwiri	Vg66	7	1	3	2	36	1	1	2	1		5	2	0	7	3	0	0	0	0	0		1	0	0	0	0	0	0	0	0	0	0	0	0
2	2015-03-04 13:33:31	2015-03-04 16:48:48	2015-03-04	359000000000000	Collins	Chinkhwiri	Vg60	12	2	1	1	29	1	1	3	1		2	2	0	4	3	0	0	0	0	0		1	0	0	0	0	0	0	0	0	0	0	0	0
2	2015-03-04 13:36:27	2015-03-04 17:31:30	2015-03-04	359000000000000	Phonex	Chinkhwiri	Vg64	18	1	1	1	28	1	1	2	1		1	2	0	3	3	0	0	0	0	0		1	0	0	0	0	0	0	0	0	0	0	0	0
[truncated: 13,797 more rows]

## Sheet: Data Dictionary
Variable	Description	Coding
Data	Data from two versions of Questionnaires	1=old questionnaire , 2=final questionnaire
start	Start time of interviewing a respondent
end	End time of interviewing a respondent
date	Actual date of interview
deviceid	ID for the device used
authuser	Name of authorised user of the device
facility	Name of Health Facility
cluster	Name of the Cluster (Village)
hhid	ID for the household
respid	ID for the respondent
relation	Relationship of the respondent to the Heah of household	1=Head of household, 2=Husband, 3=Wife, 4=Mother/father, 5=Son/daughter, 6=Relative, 7=Non relative
sex	Sex of the respondent	1=Male, 2=Female
age	Age of the respondent
dwelling	dwelling area of the respondent	1=Rural, 2=Urban (Boma or Trading Centre)
mstatus	Marital status of the respondent	1=Married, 2=Divorced/separated, 3=Widowed, 4=Never married
education	Highest level of education for the respondent	1=None, 2=Primary, 3=Secondary, 4=Diploma/Degree, 5=Postgraduate
incomeearn	Main source of income for the household	1=Farming, 2=Business, 3=Casual work, 4=Civil Servant, 5=Private Sector, 6=Craftsman, 7=Remittances, 8=Social Cash Transfer
incomeother	Specify other source of income
occupation	Occupation of the respondent	1=Farming, 2=Business, 3=Casual work, 4=Employed, 5=Student
occupationother	Specify other occupation
youth	Number of household members aged <15years
middle	Number of household members aged 15-39years
elders	Number of household members aged >40years
totalpeople	Total number of people in the household
energy	Main source of energy for cooking in the household	1=Paraffin/Kerosine, 2=Charcoal, 3=Firewood, 4=Crop residues, 5=Electricity, 6=Dung, 7=Liquid Petroleum Gas
glasses	Does the respondent have difficulty or problem in seeing even if wearing glasses	1=No - no difficulty, 2= Yes - some difficulty , 3=Yes - a lot of difficulty, 4=Cannot see at all
glasscause	Likely causes of seeing problems	1=Born with, 2=Illness, 3=Accident, 4=Do not know
glassduration	Duration (in months) of the seeing problem
glassstatus	Status of the seeing problem	1=Getting better, 2=No change, 3=Getting worse
hearing	Does the respondent have difficulty or problem in hearing even when using hearing aid	1=No - no difficulty, 2= Yes - some difficulty , 3=Yes - a lot of difficulty, 4=Cannot see at all
hearcause	Likely causes of hearing problems	1=Born with, 2=Illness, 3=Accident, 4=Do not know
hearduration	Duration (in months) of thehearing problem
hearstatus	Status of the hearing problem	1=Getting better, 2=No change, 3=Getting worse
Walking	Does the respondent have difficulty or problem in walking or climbing uphill	1=No - no difficulty, 2= Yes - some difficulty , 3=Yes - a lot of difficulty, 4=Cannot see at all
walkcause	Likely causes of walking problems	1=Born with, 2=Illness, 3=Accident, 4=Do not know
walkduration	Duration (in months) of the walking problem
walkstatus	Status of thewalking problem	1=Getting better, 2=No change, 3=Getting worse
remembering	Does the respondent have difficulty or problem in remembering or concentrating	1=No - no difficulty, 2= Yes - some difficulty , 3=Yes - a lot of difficulty, 4=Cannot see at all
remembercause	Likely causes of remembering problems	1=Born with, 2=Illness, 3=Accident, 4=Do not know
rememberduration	Duration (in months) of the remembering problem
rememberstatus	Status of the remembering problem	1=Getting better, 2=No change, 3=Getting worse
washing	Does the respondent have difficulty or problem in washing all over or dressing	1=No - no difficulty, 2= Yes - some difficulty , 3=Yes - a lot of difficulty, 4=Cannot see at all
washcause	Likely causes of washing problems	1=Born with, 2=Illness, 3=Accident, 4=Do not know
washduration	Duration (in months) of the washing problem
washstatus	Status of thewashing problem	1=Getting better, 2=No change, 3=Getting worse
speaking	Using the usual (customary) language, do you have difficulty communicating/speaking (for example understanding or being understood by others)	1=No - no difficulty, 2= Yes - some difficulty , 3=Yes - a lot of difficulty, 4=Cannot see at all
speakcause	Likely causes ofspeaking problems	1=Born with, 2=Illness, 3=Accident, 4=Do not know
speakduration	Duration (in months) of the speaking problem
speakstatus	Status of the speaking problem	1=Getting better, 2=No change, 3=Getting worse
ccough	Did the respondent have the symptom of Chronic/persistent cough other than when you have had a cough
coughb	Did the respondent have symptom of Coughing Blood	1=Yes, 0=No
wheeze	Did the respondent have symptom of Wheezing or whistling in the chest	1=Yes, 0=No
breath	Did the respondent have symptom of Shortness of breath when hurrying on the level or walking up a slight hill.	1=Yes, 0=No
sputum	Did the respondent have symptom of Bringing sputum up from your your chest other than when you have had a cold.	1=Yes, 0=No
othersymp	Other symptoms
specifysymp	Specify symptoms
centralhospital	Did respondent seek treatment for the symptoms from central hospital	1=Yes, 0=No
district	Did respondent seek treatment for the symptoms from district hospital	1=Yes, 0=No
mission	Did respondent seek treatment for the symptoms from mission hospital	1=Yes, 0=No
healthcentre	Did respondent seek treatment for the symptoms from health centre	1=Yes, 0=No
dispensary	Did respondent seek treatment for the symptoms from dispensary	1=Yes, 0=No
pharmacy	Did respondent seek treatment for the symptoms from pharmacy	1=Yes, 0=No
herbalist	Did respondent seek treatment for the symptoms from herbalist	1=Yes, 0=No
private	Did respondent seek treatment for the symptoms from private hospital	1=Yes, 0=No
selftreat	Did respondent seek treatment for the symptoms from self treatment	1=Yes, 0=No
prayers	Did respondent seek treatment for the symptoms through prayers	1=Yes, 0=No
tbtreat	Has the respondent ever been treated of TB	1=Yes, 0=No
asthmatreat	Has the respondent ever been treated of Asthma	1=Yes, 0=No
copdtreat	Has the respondent ever been treated of COPD	1=Yes, 0=No
bronchtreat	Has the respondent ever been treated of Bronchiectasis	1=Yes, 0=No
resptractitreat	Has the respondent ever been treated of Respiratory Tract Infection	1=Yes, 0=No
healthpassport	Seeking consent to have a look at the respondent's health passport	1=Yes, 2=No, I don’t have, 3=No, I don’t want, 4=No, I lost it, 5=No, I cant retrieve it
diagtb	In the health passport, is there a diagnosis of TB	1=Yes, 0=No
diagasthma	In the health passport, is there a diagnosis of Asthma	1=Yes, 0=No
diagcopd	In the health passport, is there a diagnosis of COPD	1=Yes, 0=No
diagbronch	In the health passport, is there a diagnosis of Bronchiectasis	1=Yes, 0=No
diagresptract	In the health passport, is there a diagnosis of Respiratory Tract Infection	1=Yes, 0=No
tbdrug	In the health passport, is there a diagnosis of prescription of TB Drugs	1=Yes, 0=No
inhaler	In the health passport, is there a diagnosis of prescription of b. Salbutamol Inhalers	1=Yes, 0=No
inhaledcort	In the health passport, is there a diagnosis of prescription of Inhaled Corticosteroid	1=Yes, 0=No
salbutamol	In the health passport, is there a diagnosis of prescription of Salbutamol tablets	1=Yes, 0=No
aminophylline	In the health passport, is there a diagnosis of prescription of Aminophylline tablets	1=Yes, 0=No
antibiotic	In the health passport, is there a diagnosis of prescription of Antibiotics	1=Yes, 0=No
otherdrug	In the health passport, is there a diagnosis of prescription of Other Drugs	1=Yes, 0=No
specifydrug	Specify Other Drugs
healthpic	Take picture of diagnoses & prescriptions from Health Passport
healthpic1	Take picture of diagnoses & prescriptions from Health Passport if there is a 2nd page
healthpic2	Take picture of diagnoses & prescriptions from Health Passport if there is a 3rd page
recentdiag	If more than one diagnosis was made, which was the most recent one?
costsquestions	Patients' costs
costsprediagnostic	Prediagnostic Costs
costsbeforediag	Costs before Diagnosis on
costsadmin	Costs before Diagnosis on administration fees
coststests	Costs before Diagnosis on tests
costsxray	Costs before Diagnosis on Xray
costsdrugcosts	Costs before Diagnosis on drugs
coststravel	Costs before Diagnosis on travel
costsfood	Costs before Diagnosis on food
costsaccommodation	Costs before Diagnosis on accommodation
costscoping	Coping Costs
borrowmuch	Did the respondent borrowed any money to cover costs due to for your most recent illness?	1=Yes, 0=No
howmuch	If the respondent borrowed any money to cover costs due to for your most recent illness, how much did he/she borrow?
fromfamily	Did he/she borrow from a family member?	1=Yes, 0=No
fromneighbour	Did he/she borrow from a neighbour?	1=Yes, 0=No
frombank	Did he/she borrow from a bank?	1=Yes, 0=No
fromcooperatives	Did he/she borrow from a cooperative?	1=Yes, 0=No
fromother	Did he/she borrow from Other sources?	1=Yes, 0=No
fromotherspecify	If he/she borrowed from other sources, specify the source
loanduration	Duration of repayment of the loan (in months)	1=Less than a month, 2=1Month, 3=2-3Months, 4=4-5Months 5=More than 5Months
loaninterval	Intervals at which loan repayments are to be made	1=Weekly, 2=Monthly, 3=Annually, 4=Am not expected to pay back the money, 5=Open/Indefinate
loanintervalother	Loan interval other than specified above
interestrate	What is the interest rate on the loan?	1=Less than 10%, 2=10 to 15%, 3=More than 15%, 4=I don’t pay interest
sellproperty	Did the respondent sell any of his/her property to finance the cost of the most recent illness	1=Yes, 0=No
sellland	If he/she sold any property, was it land?	1=Yes, 0=No
selllivestock	If he/she sold any property, was it livestock?	1=Yes, 0=No
selltransport	If he/she sold any property, was it a vehicle?	1=Yes, 0=No
sellhousehold	If he/she sold any property, was it a household item?	1=Yes, 0=No
sellfarm	If he/she sold any property, was it farm produce?	1=Yes, 0=No
sellother	If he/she sold any property, was it property other than mentioned above?	1=Yes, 0=No
sellotherspecify	It was other property, specify.
saleearn	How much did the respondent earn from the sale of the property?
marketvalue	Estimated market value of the property the respondent sold
coststreatcosts	Treatment Costs
drugtaken	Does the respondent go to get drugs for his/her most recent illness?	1=Yes, 0=No
medisource	Where does the respondent currently get drugs for his/her most recent illness	1=Central Hospital, 2=District Hospital, 3=Mission Hospital, 4=Health Centre, 5=Dispensary, 6=Pharmacy, drug and grocery store, 7=Private Hospital/Clinic
drugfreq	How many times a month does the respondent go there to take his/her drugs	1=Once, 2=Twice, 3=Three Times, 4=Four Times, 5=Five Times, 6=Six Times, 7=Seven Times
whosupport	Who supports him/her when getting the drugs?	1=Family member, 2=HAS, 3=IHP, 4=Self/No-one
whosupportother	Who supports him/her when getting the drugs if not mentioned above?
transmode	Mode of transport the respondent uses when going to get the drugs.	1=Walking, 2=Bicyle, 3=Bicyle Taxi (Kabaza), 4=Ox-cart, 5=Motorcycle, 6=Bus, 7=Car
transmodeother	Mode of transport the respondent uses when going to get the drugs, if not mentioned above
travelperiod	How long does it take to get there (in minutes)?
traveltime	How long does one of these visits take on average, including time on the road and waiting time?
travelcost	From the respondent's home to the health facility, how much (in Malawi Kwacha) does it cost if he/she takes the transport (both ways)?
foodcost	If the respondent needs to buy food (e.g. lunch), how much, in Malawi Kwacha, does he/she spend on food while travelling or waiting?
adminfees	Does the respondent have to pay administration fees when he/she goes to receive treatment for the most recent illness?	1=Yes, 0=No
adminfeescost	How much?
accommodationfees	Does the respondent have any accommodation costs when picking up his/herdrugs for the most recent illness?	1=Yes, 0=No
accommodationfeescost	How much?
followupcost	Since the beginning of treatment, has the respondent ever had to go to the health facility in addition to his/her scheduled visits for follow up tests?	1=Yes, 0=No
followuptime	How long does one of these assessment visits take on average, including time on the road, waiting time and tests (total turnaround time)?
guardiancosts	Costs incurred by guardians
familyescort	Does any family/friend accompany the respondent on any visits or go in his/her place to collect drugs for the most recent illness?	1=Yes, 0=No
guardvisitnumber
guardschedulevisit	Number of scheduled visits for assessment for the most recent illness/follow up a respondent was accompanied or somebody going on his/her behalf
guardunschedulevisit	Number of unscheduled visits to any healthcare facility for the most recent illness/follow up a respondent was accompanied or somebody going on his/her behalf
scheduledtrans	How much does the respondent's supporter spend on scheduled visits for assessment on transport
scheduledfood	How much does the respondent's supporter spend on scheduled visits for assessment on food
scheduledaccommodation	How much does the respondent's supporter spend on scheduled visits for assessment on accommodation
scheduledtotal	How much does the respondent's supporter spend on scheduled visits for assessment in total
unscheduledtrans	How much does the respondent's supporter spend on unscheduled visits to any health care facility on transport
unscheduledfood	How much does the respondent's supporter spend on unscheduled visits to any health care facility on food
unscheduledaccommodation	How much does the respondent's supporter spend on unscheduled visits to any health care facility on accommodation
unscheduledtotal	How much does the respondent's supporter spend on unscheduled visits to any health care facility in total
guardincome	Does the respondent'sfriend/family have an income?	1=Yes, 0=No
guardincomeday	If Yes, how much per day?
whyescort	What was the main reason other than listed above why someone accompanied the respondent?	1=Administrative barriers, 2=Distance, 3=Security, 4=Too ill to travel, 5=Was required for treatment, 6=Disability
whyescortother	What was the main reason why someone accompanied the respondent?
costshospitalization	Hospitalization Costs
everhospitalized	Have the respondent been hospitalised for his/her most recent illness?	1=Yes, 0=No
admitduration	How many days in total did the respondent stay at the hospital over the last 6 months?:
adminpay	How much did the respondent pay in the hospital during his/her entire stay on hospital administration fees costs
sheetspay	How much did the respondent pay in the hospital during his/her entire stay on bed costs
foodpay	How much did the respondent pay in the hospital during his/her entire stay on food costs
transpay	How much did the respondent pay in the hospital during his/her entire stay on transport costs
drugpay	How much did the respondent pay in the hospital during his/her entire stay on drugs costs
payspecify	How much did the respondent pay in the hospital during his/her entire stay on other costs
totalpay	How much did the respondent pay in the hospital during his/her entire stay on total costs
familystay	Did any family/friend stay with the respondent while in hospital?	1=Yes, 0=No
familydays	How many days in total did family/friend stay with the respondent (sleep there)?
familyfood	How much did the respondent's relative/friend pay for staying in the hospital on food?
familytrans	How much did the respondent's relative/friend pay for staying in the hospital on transport?
familyaccommodation	How much did the respondent's relative/friend pay for staying in the hospital on accommodation?
familyother	How much did the respondent's relative/friend pay for staying in the hospital on other costs?
familytotal	How much did the respondent's relative/friend pay for staying in the hospital in total?
familyothercosts	If there were other costs, then specify
familyincome	Does the respondent's friend/family/PAL supporter have an income?	1=Yes, 0=No
incomeperday	If Yes, how much per day?
familyvisit	Did any other family/friend visit the respondent while he/she was in hospital?	1=Yes, 0=No
peoplevisited	If Yes, how many people visited the respondent?
timesvisited	How many times did they visit the respondent?
visitfood	What were the costs for the respondent's relative/friend who visited him/her in the hospital on food?
visittrans	What were the costs for the respondent's relative/friend who visited him/her in the hospital on transport?
visitaccommodation	What were the costs for the respondent's relative/friend who visited him/her in the hospital on accommodation?
visitother	What were the costs for the respondent's relative/friend who visited him/her in the hospital on other costs?
visittotal	What were the costs for the respondent's relative/friend who visited him/her in the hospital in total?
visitothercosts	If there were other costs, then specify
visitduration	How long (in minutes) were the visits including travelling time?
productivityloss	Productivity Loss
stopwork	Has the respondent ever stopped working/going to school/doing housework due to his/her lung symptoms?	1=Yes, 0=No
stophowlong	If Yes, for how long?
stayhome	Does someone stay home specifically to take care of the respondent?	1=Yes, 0=No
stayhowlong	If Yes, for how long (in weeks)?	1=Less than a month, 2=1Month, 3=2-3Months, 4=4-5Months 5=More than 5Months
quitearning	Did they quit their income-earning job to stay home and care for the respondent?	1=Yes, 0=No
beforeill	How regularly did the respondent work before he/she developed his/her lung symptoms?	1=Throughout the year, 2=Seasonal/Part of the year, 3=Day labour
beforeillother	Specify if there is other from the above list
changejobs	Did the respondent have to change jobs when he/she developed the lung symptoms?	1=Yes, 0=No
mainoccupation	What was the respondent's main occupation?:	1=Sales/Service, 2=Agriculture, 3=Household duties, 4=Production/Construction
mainoccupationother	Specify if it is a different occuoation from the above list
hoursperweek	How many hours did the respondent work/study on average per week BEFORE he/she developed the lung symptoms?
hoursnow	How many hours does the respondent work/study on average NOW per week?
illrelated	If answers to the two preceding questions differ, is the change related to the illness?	1=Yes, 0=No
workonbehalf	If answers to the two questions differ, s someone doing the work that you used to do?	1=Yes, 0=No
whoworks	If Yes, who works on behalf of the respondent?	1=Daughter, 2=Son, 3=Spouse, 4=Friend, 5=Nobody, 6=Other Family Member
latitude	Latitude of the household location
longitude	Longitude of the household location
altitude	Altitude of the household location
accuracy	Range of accuracy from the actual spot of the coordinates
commyn	Any comment or not?	1=Yes, 0=No
comment	If Yes above then write comment here
instanceid	Row ID
key	Row Key
Data
start
end
date
deviceid
authuser
facility
cluster
hhid
respid
relation
sex
age
dwelling
mstatus
education
incomeearn
incomeother
occupation
occupationother
youth
middle
elders
totalpeople
energy
glasses
glasscause
glassduration
glassstatus
hearing
hearcause
hearduration
hearstatus
Walking
walkcause
walkduration
walkstatus
remembering
remembercause
rememberduration
rememberstatus
washing
washcause
washduration
washstatus
speaking
speakcause
speakduration
speakstatus
ccough
coughb
wheeze
breath
sputum
othersymp
specifysymp
centralhospital
district
mission
healthcentre
dispensary
pharmacy
herbalist
private
selftreat
prayers
tbtreat
asthmatreat
copdtreat
bronchtreat
resptractitreat
healthpassport
diagtb
diagasthma
diagcopd
diagbronch
diagresptract
tbdrug
inhaler
inhaledcort
salbutamol
aminophylline
antibiotic
otherdrug
specifydrug
healthpic
healthpic1
healthpic2
recentdiag
costsquestions
costsprediagnostic
costsbeforediag
costsadmin
coststests
costsxray
costsdrugcosts
coststravel
costsfood
costsaccommodation
costscoping
borrowmuch
howmuch
fromfamily
fromneighbour
frombank
fromcooperatives
fromother
fromotherspecify
loanduration
loaninterval
loanintervalother
interestrate
sellproperty
sellland
selllivestock
selltransport
sellhousehold
sellfarm
sellother
sellotherspecify
saleearn
marketvalue
coststreatcosts
drugtaken
medisource
drugfreq
whosupport
whosupportother
transmode
transmodeother
travelperiod
traveltime
travelcost
foodcost
adminfees
adminfeescost
accommodationfees
accommodationfeescost
followupcost
followuptime
guardiancosts
familyescort
guardvisitnumber
guardschedulevisit
guardunschedulevisit
scheduledtrans
scheduledfood
scheduledaccommodation
scheduledtotal
unscheduledtrans
unscheduledfood
unscheduledaccommodation
unscheduledtotal
guardincome
guardincomeday
whyescort
whyescortother
costshospitalization
everhospitalized
admitduration
adminpay
sheetspay
foodpay
transpay
drugpay
payspecify
totalpay
familystay
familydays
familyfood
familytrans
familyaccommodation
familyother
familytotal
familyothercosts
familyincome
incomeperday
familyvisit
peoplevisited
timesvisited
visitfood
visittrans
visitaccommodation
visitother
visittotal
visitothercosts
visitduration
productivityloss
stopwork
stophowlong
stayhome
stayhowlong
quitearning
beforeill
beforeillother
changejobs
mainoccupation
mainoccupationother
hoursperweek
hoursnow
illrelated
workonbehalf
whoworks
latitude
longitude
altitude
accuracy
commyn
comment
instanceid
key
Data
start
end
date
deviceid
authuser
facility
cluster
hhid
respid
relation
sex
age
dwelling
mstatus
education
incomeearn
incomeother
occupation
occupationother
youth
middle
elders
totalpeople
energy
glasses
glasscause
glassduration
glassstatus
hearing
hearcause
hearduration
hearstatus
Walking
walkcause
walkduration
walkstatus
remembering
remembercause
rememberduration
rememberstatus
washing
washcause
washduration
washstatus
speaking
speakcause
speakduration
speakstatus
ccough
coughb
wheeze
breath
sputum
othersymp
specifysymp
centralhospital
district
mission
healthcentre
dispensary
pharmacy
herbalist
private
selftreat
prayers
tbtreat
asthmatreat
copdtreat
bronchtreat
resptractitreat
healthpassport
diagtb
diagasthma
diagcopd
diagbronch
diagresptract
tbdrug
inhaler
inhaledcort
salbutamol
aminophylline
antibiotic
otherdrug
specifydrug
healthpic
healthpic1
healthpic2
recentdiag
costsquestions
costsprediagnostic
costsbeforediag
costsadmin
coststests
costsxray
costsdrugcosts
coststravel
costsfood
costsaccommodation
costscoping
borrowmuch
howmuch
fromfamily
fromneighbour
frombank
fromcooperatives
fromother
fromotherspecify
loanduration
loaninterval
loanintervalother
interestrate
sellproperty
sellland
selllivestock
selltransport
sellhousehold
sellfarm
sellother
sellotherspecify
saleearn
marketvalue
coststreatcosts
drugtaken
medisource
drugfreq
whosupport
whosupportother
transmode
transmodeother
travelperiod
traveltime
travelcost
foodcost
adminfees
adminfeescost
accommodationfees
accommodationfeescost
followupcost
followuptime
guardiancosts
familyescort
guardvisitnumber
guardschedulevisit
guardunschedulevisit
scheduledtrans
scheduledfood
scheduledaccommodation
scheduledtotal
unscheduledtrans
unscheduledfood
unscheduledaccommodation
unscheduledtotal
guardincome
guardincomeday
whyescort
whyescortother
costshospitalization
everhospitalized
admitduration
adminpay
sheetspay
foodpay
transpay
drugpay
payspecify
totalpay
familystay
familydays
familyfood
familytrans
familyaccommodation
familyother
familytotal
familyothercosts
familyincome
incomeperday
familyvisit
peoplevisited
timesvisited
visitfood
visittrans
visitaccommodation
visitother
visittotal
visitothercosts
visitduration
productivityloss
stopwork
stophowlong
stayhome
stayhowlong
quitearning
beforeill
beforeillother
changejobs
mainoccupation
mainoccupationother
hoursperweek
hoursnow
illrelated
workonbehalf
whoworks
latitude
longitude
altitude
accuracy
commyn
comment
instanceid
key
Data
start
end
date
deviceid
authuser
facility
cluster
hhid
respid
relation
sex
age
dwelling
mstatus
education
incomeearn
incomeother
occupation
occupationother
youth
middle
elders
totalpeople
energy
glasses
glasscause
glassduration
glassstatus
hearing
hearcause
hearduration
hearstatus
Walking
walkcause
walkduration
walkstatus
remembering
remembercause
rememberduration
rememberstatus
washing
washcause
washduration
washstatus
speaking
speakcause
speakduration
speakstatus
ccough
coughb
wheeze
breath
sputum
othersymp
specifysymp
centralhospital
district
mission
healthcentre
dispensary
pharmacy
herbalist
private
selftreat
prayers
tbtreat
asthmatreat
copdtreat
bronchtreat
resptractitreat
healthpassport
diagtb
diagasthma
diagcopd
diagbronch
diagresptract
tbdrug
inhaler
inhaledcort
salbutamol
aminophylline
antibiotic
otherdrug
specifydrug
healthpic
healthpic1
healthpic2
recentdiag
costsquestions
costsprediagnostic
costsbeforediag
costsadmin
coststests
costsxray
costsdrugcosts
coststravel
costsfood
costsaccommodation
costscoping
borrowmuch
howmuch
fromfamily
fromneighbour
frombank
fromcooperatives
fromother
fromotherspecify
loanduration
loaninterval
loanintervalother
interestrate
sellproperty
sellland
selllivestock
selltransport
sellhousehold
sellfarm
sellother
sellotherspecify
saleearn
marketvalue
coststreatcosts
drugtaken
medisource
drugfreq
whosupport
whosupportother
transmode
transmodeother
travelperiod
traveltime
travelcost
foodcost
adminfees
adminfeescost
accommodationfees
accommodationfeescost
followupcost
followuptime
guardiancosts
familyescort
guardvisitnumber
guardschedulevisit
guardunschedulevisit
scheduledtrans
scheduledfood
scheduledaccommodation
scheduledtotal
unscheduledtrans
unscheduledfood
unscheduledaccommodation
unscheduledtotal
guardincome
guardincomeday
whyescort
whyescortother
costshospitalization
everhospitalized
admitduration
adminpay
sheetspay
foodpay
transpay
drugpay
payspecify
totalpay
familystay
familydays
familyfood
familytrans
familyaccommodation
familyother
familytotal
familyothercosts
familyincome
incomeperday
familyvisit
peoplevisited
timesvisited
visitfood
visittrans
visitaccommodation
visitother
visittotal
visitothercosts
visitduration
productivityloss
stopwork
stophowlong
stayhome
stayhowlong
quitearning
beforeill
beforeillother
changejobs
mainoccupation
mainoccupationother
hoursperweek
hoursnow
illrelated
workonbehalf
whoworks
latitude
longitude
altitude
accuracy
commyn
comment
instanceid
key
Data
start
end
date
deviceid
authuser
facility
cluster
hhid
respid
relation
sex
age
dwelling
mstatus
education
incomeearn
incomeother
occupation
occupationother
youth
middle
elders
totalpeople
energy
glasses
glasscause
glassduration
glassstatus
hearing
hearcause
hearduration
hearstatus
Walking
walkcause
walkduration
walkstatus
remembering
remembercause
rememberduration
rememberstatus
washing
washcause
washduration
washstatus
speaking
speakcause
speakduration
speakstatus
ccough
coughb
wheeze
breath
sputum
othersymp
specifysymp
centralhospital
district
mission
healthcentre
dispensary
pharmacy
herbalist
private
selftreat
prayers
tbtreat
asthmatreat
copdtreat
bronchtreat
resptractitreat
healthpassport
diagtb
diagasthma
diagcopd
diagbronch
diagresptract
tbdrug
inhaler
inhaledcort
salbutamol
aminophylline
antibiotic
otherdrug
specifydrug
healthpic
healthpic1
healthpic2
recentdiag
costsquestions
costsprediagnostic
costsbeforediag
costsadmin
coststests
costsxray
costsdrugcosts
coststravel
costsfood
costsaccommodation
costscoping
borrowmuch
howmuch
fromfamily
fromneighbour
frombank
fromcooperatives
fromother
fromotherspecify
loanduration
loaninterval
loanintervalother
interestrate
sellproperty
sellland
selllivestock
selltransport
sellhousehold
sellfarm
sellother
sellotherspecify
saleearn
marketvalue
coststreatcosts
drugtaken
medisource
drugfreq
whosupport
whosupportother
transmode
transmodeother
travelperiod
traveltime
travelcost
foodcost
adminfees
adminfeescost
accommodationfees
accommodationfeescost
followupcost
followuptime
guardiancosts
familyescort
guardvisitnumber
guardschedulevisit
guardunschedulevisit
scheduledtrans
scheduledfood
scheduledaccommodation
scheduledtotal
unscheduledtrans
unscheduledfood
unscheduledaccommodation
unscheduledtotal
guardincome
guardincomeday
whyescort
whyescortother
costshospitalization
everhospitalized
admitduration
adminpay
sheetspay
foodpay
transpay
drugpay
payspecify
totalpay
familystay
familydays
familyfood
familytrans
familyaccommodation
familyother
familytotal
familyothercosts
familyincome
incomeperday
familyvisit
peoplevisited
timesvisited
visitfood
visittrans
visitaccommodation
visitother
visittotal
visitothercosts
visitduration
productivityloss
stopwork
stophowlong
stayhome
stayhowlong
quitearning
beforeill
beforeillother
changejobs
mainoccupation
mainoccupationother
hoursperweek
hoursnow
illrelated
workonbehalf
whoworks
latitude
longitude
altitude
accuracy
commyn
comment
instanceid
key
Data
start
end
date
deviceid
authuser
facility
cluster
hhid
respid
relation
sex
age
dwelling
mstatus
education
incomeearn
incomeother
occupation
occupationother
youth
middle
elders
totalpeople
energy
glasses
glasscause
glassduration
glassstatus
hearing
hearcause
hearduration
hearstatus
Walking
walkcause
walkduration
walkstatus
remembering
remembercause
rememberduration
rememberstatus
washing
washcause
washduration
washstatus
speaking
speakcause
speakduration
speakstatus
ccough
coughb
wheeze
breath
sputum
othersymp
specifysymp
centralhospital
district
mission
healthcentre
dispensary
pharmacy
herbalist
private
selftreat
prayers
tbtreat
asthmatreat
copdtreat
bronchtreat
resptractitreat
healthpassport
diagtb
diagasthma
diagcopd
diagbronch
diagresptract
tbdrug
inhaler
inhaledcort
salbutamol
aminophylline
antibiotic
otherdrug
specifydrug
healthpic
healthpic1
healthpic2
recentdiag
costsquestions
costsprediagnostic
costsbeforediag
costsadmin
coststests
costsxray
costsdrugcosts
coststravel
costsfood
costsaccommodation
costscoping
borrowmuch
howmuch
fromfamily
fromneighbour
frombank
fromcooperatives
fromother
fromotherspecify
loanduration
loaninterval
loanintervalother
interestrate
sellproperty
sellland
selllivestock
selltransport
sellhousehold
sellfarm
sellother
sellotherspecify
saleearn
marketvalue
coststreatcosts
drugtaken
medisource
drugfreq
whosupport
whosupportother
transmode
transmodeother
travelperiod
traveltime
travelcost
foodcost
adminfees
adminfeescost
accommodationfees
accommodationfeescost
followupcost
followuptime
guardiancosts
familyescort
guardvisitnumber
guardschedulevisit
guardunschedulevisit
scheduledtrans
scheduledfood
scheduledaccommodation
scheduledtotal
unscheduledtrans
unscheduledfood
unscheduledaccommodation
unscheduledtotal
guardincome
guardincomeday
whyescort
whyescortother
costshospitalization
everhospitalized
admitduration
adminpay
sheetspay
foodpay
transpay
drugpay
payspecify
totalpay
familystay
familydays
familyfood
familytrans
familyaccommodation
familyother
familytotal
familyothercosts
familyincome
incomeperday
familyvisit
peoplevisited
timesvisited
visitfood
visittrans
visitaccommodation
visitother
visittotal
visitothercosts
visitduration
productivityloss
stopwork
stophowlong
stayhome
stayhowlong
quitearning
beforeill
beforeillother
changejobs
mainoccupation
mainoccupationother
hoursperweek
hoursnow
illrelated
workonbehalf
whoworks
latitude
longitude
altitude
accuracy
commyn
comment
instanceid
key
Data
start
end
date
deviceid
authuser
facility
cluster
hhid
respid
relation
sex
age
dwelling
mstatus
education
incomeearn
incomeother
occupation
occupationother
youth
middle
elders
totalpeople
energy
glasses
glasscause
glassduration
glassstatus
hearing
hearcause
hearduration
hearstatus
Walking
walkcause
walkduration
walkstatus
remembering
remembercause
rememberduration
rememberstatus
washing
washcause
washduration
washstatus
speaking
speakcause
speakduration
speakstatus
ccough
coughb
wheeze
breath
sputum
othersymp
specifysymp
centralhospital
district
mission
healthcentre
dispensary
pharmacy
herbalist
private
selftreat
prayers
tbtreat
asthmatreat
copdtreat
bronchtreat
resptractitreat
healthpassport
diagtb
diagasthma
diagcopd
diagbronch
diagresptract
tbdrug
inhaler
inhaledcort
salbutamol
aminophylline
antibiotic
otherdrug
specifydrug
healthpic
healthpic1
healthpic2
recentdiag
costsquestions
costsprediagnostic
costsbeforediag
costsadmin
coststests
costsxray
costsdrugcosts
coststravel
costsfood
costsaccommodation
costscoping
borrowmuch
howmuch
fromfamily
fromneighbour
frombank
fromcooperatives
fromother
fromotherspecify
loanduration
loaninterval
loanintervalother
interestrate
sellproperty
sellland
selllivestock
selltransport
sellhousehold
sellfarm
sellother
sellotherspecify
saleearn
marketvalue
coststreatcosts
drugtaken
medisource
drugfreq
whosupport
whosupportother
transmode
transmodeother
travelperiod
traveltime
travelcost
foodcost
adminfees
adminfeescost
accommodationfees
accommodationfeescost
followupcost
followuptime
guardiancosts
familyescort
guardvisitnumber
guardschedulevisit
guardunschedulevisit
scheduledtrans
scheduledfood
scheduledaccommodation
scheduledtotal
unscheduledtrans
unscheduledfood
unscheduledaccommodation
unscheduledtotal
guardincome
guardincomeday
whyescort
whyescortother
costshospitalization
everhospitalized
admitduration
adminpay
sheetspay
foodpay
transpay
drugpay
payspecify
totalpay
familystay
familydays
familyfood
familytrans
familyaccommodation
familyother
familytotal
familyothercosts
familyincome
incomeperday
familyvisit
peoplevisited
timesvisited
visitfood
visittrans
visitaccommodation
visitother
visittotal
visitothercosts
visitduration
productivityloss
stopwork
stophowlong
stayhome
stayhowlong
quitearning
beforeill
beforeillother
changejobs
mainoccupation
mainoccupationother
hoursperweek
hoursnow
illrelated
workonbehalf
whoworks
latitude
longitude
altitude
accuracy
commyn
comment
instanceid
key
Data
start
end
date
deviceid
authuser
facility
cluster
hhid
respid
relation
sex
age
dwelling
mstatus
education
incomeearn
incomeother
occupation
occupationother
youth
middle
elders
totalpeople
energy
glasses
glasscause
glassduration
glassstatus
hearing
hearcause
hearduration
hearstatus
Walking
walkcause
walkduration
walkstatus
remembering
remembercause
rememberduration
rememberstatus
washing
washcause
washduration
washstatus
speaking
speakcause
speakduration
speakstatus
ccough
coughb
wheeze
breath
sputum
othersymp
specifysymp
centralhospital
district
mission
healthcentre
dispensary
pharmacy
herbalist
private
selftreat
prayers
tbtreat
asthmatreat
copdtreat
bronchtreat
resptractitreat
healthpassport
diagtb
diagasthma
diagcopd
diagbronch
diagresptract
tbdrug
inhaler
inhaledcort
salbutamol
aminophylline
antibiotic
otherdrug
specifydrug
healthpic
healthpic1
healthpic2
recentdiag
costsquestions
costsprediagnostic
costsbeforediag
costsadmin
coststests
costsxray
costsdrugcosts
coststravel
costsfood
costsaccommodation
costscoping
borrowmuch
howmuch
fromfamily
fromneighbour
frombank
fromcooperatives
fromother
fromotherspecify
loanduration
loaninterval
loanintervalother
interestrate
sellproperty
sellland
selllivestock
selltransport
sellhousehold
sellfarm
sellother
sellotherspecify
saleearn
marketvalue
coststreatcosts
drugtaken
medisource
drugfreq
whosupport
whosupportother
transmode
transmodeother
travelperiod
traveltime
travelcost
foodcost
adminfees
adminfeescost
accommodationfees
accommodationfeescost
followupcost
followuptime
guardiancosts
familyescort
guardvisitnumber
guardschedulevisit
guardunschedulevisit
scheduledtrans
scheduledfood
scheduledaccommodation
scheduledtotal
unscheduledtrans
unscheduledfood
unscheduledaccommodation
unscheduledtotal
guardincome
guardincomeday
whyescort
whyescortother
costshospitalization
everhospitalized
admitduration
adminpay
sheetspay
foodpay
transpay
drugpay
payspecify
totalpay
familystay
familydays
familyfood
familytrans
familyaccommodation
familyother
familytotal
familyothercosts
familyincome
incomeperday
familyvisit
peoplevisited
timesvisited
visitfood
visittrans
visitaccommodation
visitother
visittotal
visitothercosts
visitduration
productivityloss
stopwork
stophowlong
stayhome
stayhowlong
quitearning
beforeill
beforeillother
changejobs
mainoccupation
mainoccupationother
hoursperweek
hoursnow
illrelated
workonbehalf
whoworks
latitude
longitude
altitude
accuracy
commyn
comment
instanceid
key
Data
start
end
date
deviceid
authuser
facility
cluster
hhid
respid
relation
sex
age
dwelling
mstatus
education
incomeearn
incomeother
occupation
occupationother
youth
middle
elders
totalpeople
energy
glasses
glasscause
glassduration
glassstatus
hearing
hearcause
hearduration
hearstatus
Walking
walkcause
walkduration
walkstatus
remembering
remembercause
rememberduration
rememberstatus
washing
washcause
washduration
washstatus
speaking
speakcause
speakduration
speakstatus
ccough
coughb
wheeze
breath
sputum
othersymp
specifysymp
centralhospital
district
mission
healthcentre
dispensary
pharmacy
herbalist
private
selftreat
prayers
tbtreat
asthmatreat
copdtreat
bronchtreat
resptractitreat
healthpassport
diagtb
diagasthma
diagcopd
diagbronch
diagresptract
tbdrug
inhaler
inhaledcort
salbutamol
aminophylline
antibiotic
otherdrug
specifydrug
healthpic
healthpic1
healthpic2
recentdiag
costsquestions
costsprediagnostic
costsbeforediag
costsadmin
coststests
costsxray
costsdrugcosts
coststravel
costsfood
costsaccommodation
costscoping
borrowmuch
howmuch
fromfamily
fromneighbour
frombank
fromcooperatives
fromother
fromotherspecify
loanduration
loaninterval
loanintervalother
interestrate
sellproperty
sellland
selllivestock
selltransport
sellhousehold
sellfarm
sellother
sellotherspecify
saleearn
marketvalue
coststreatcosts
drugtaken
medisource
drugfreq
whosupport
whosupportother
transmode
transmodeother
travelperiod
traveltime
travelcost
foodcost
adminfees
adminfeescost
accommodationfees
accommodationfeescost
followupcost
followuptime
guardiancosts
familyescort
guardvisitnumber
guardschedulevisit
guardunschedulevisit
scheduledtrans
scheduledfood
scheduledaccommodation
scheduledtotal
unscheduledtrans
unscheduledfood
unscheduledaccommodation
unscheduledtotal
guardincome
guardincomeday
whyescort
whyescortother
costshospitalization
everhospitalized
admitduration
adminpay
sheetspay
foodpay
transpay
drugpay
payspecify
totalpay
familystay
familydays
familyfood
familytrans
familyaccommodation
familyother
familytotal
familyothercosts
familyincome
incomeperday
familyvisit
peoplevisited
timesvisited
visitfood
visittrans
visitaccommodation
visitother
visittotal
visitothercosts
visitduration
productivityloss
stopwork
stophowlong
stayhome
stayhowlong
quitearning
beforeill
beforeillother
changejobs
mainoccupation
mainoccupationother
hoursperweek
hoursnow
illrelated
workonbehalf
whoworks
latitude
longitude
altitude
accuracy
commyn
comment
instanceid
key
Data
start
end
date
deviceid
authuser
facility
cluster
hhid
respid
relation
sex
age
dwelling
mstatus
education
incomeearn
incomeother
occupation
occupationother
youth
middle
elders
totalpeople
energy
glasses
glasscause
glassduration
glassstatus
hearing
hearcause
hearduration
hearstatus
Walking
walkcause
walkduration
walkstatus
remembering
remembercause
rememberduration
rememberstatus
washing
washcause
washduration
washstatus
speaking
speakcause
speakduration
speakstatus
ccough
coughb
wheeze
breath
sputum
othersymp
specifysymp
centralhospital
district
mission
healthcentre
dispensary
pharmacy
herbalist
private
selftreat
prayers
tbtreat
asthmatreat
copdtreat
bronchtreat
resptractitreat
healthpassport
diagtb
diagasthma
diagcopd
diagbronch
diagresptract
tbdrug
inhaler
inhaledcort
salbutamol
aminophylline
antibiotic
otherdrug
specifydrug
healthpic
healthpic1
healthpic2
recentdiag
costsquestions
costsprediagnostic
costsbeforediag
costsadmin
coststests
costsxray
costsdrugcosts
coststravel
costsfood
costsaccommodation
costscoping
[truncated: 11,505 more rows]
