# Supplementary material for: Community prevalence of chronic respiratory symptoms in rural Malawi: Implications for policy
Source: PLoS One. 2017 Dec 7;12(12):e0188437. doi: 10.1371/journal.pone.0188437 (PMC5720679; doi:10.1371/journal.pone.0188437)
Supplement: S2 Data — This is the Excel spreadsheet that contains the diagnostic data that were extracted from the health passports. (XLS) [file pone.0188437.s003.xls]

## Sheet: Health Passport Cleaned Data
sn	Health_Pic	Diagnosispic	Presentationpic	Health_Pic1	Diagnosis1	Presentation1	Health_Pic2	Diagnosis2	Presentation	Drugs
1	media\1411632962672.jpg	Other	Other							Antibiotic
2	media\1411635166119.jpg	RTI	Other							Antibiotic/others
3	media\1411637512171.jpg	RTI	Other							Antibiotic/others
4	media\1411637728237.jpg	URTI	Cough	media\1411637802219.jpg	URTI	Cough				Antibiotic/others
5	media\1411637966685.jpg	Bronchitis	Other	media\1411638015127.jpg	RTI	Other				Antibiotic/others
6	media\1411638626526.jpg	Asthma	Cough/Breathlessness	media\1411638653732.jpg	Asthma	Cough				Antibiotic/Aminophyline
7	media\1411638787914.jpg	RTI	Other							Antibiotic/others
8	media\1411641003029.jpg	Other	Other							Antibiotic
9	media\1411723967396.jpg	RTI	Other							Antibiotic/others
10	media\1411725026006.jpg	RTI	Other							Antibiotic/others
11	media\1411725131437.jpg	URTI	Cough/other							Antibiotic/others
12	media\1411725679819.jpg	URTI	Cough							Antibiotic/others
13	media\1411726695739.jpg	URTI	Other							Antibiotic/others
14	media\1411727405734.jpg	Other	Cough/other							Antibiotic/others
15	media\1411728690794.jpg	RTI	Other							Antibiotic/others
16	media\1411729234133.jpg	RTI	Other							Antibiotic/others
17	media\1411729349792.jpg	Other	Chest pain							Antibiotic/others
18	media\1411744075258.jpg	RTI	Other							Antibiotic
19	media\1411980102089.jpg	RTI	Other							Antibiotic/others
20	media\1411980813264.jpg	RTI	Cough/other							Antibiotic/others
21	media\1411982090042.jpg	RTI	Other							Antibiotic
22	media\1411983603296.jpg	RTI	Cough							Antibiotic/others
23	media\1411985083406.jpg	URTI	Other							Antibiotic/others
24	media\1411986458317.jpg	URTI	Cough/other	media\1411986487028.jpg	RTI	Cough/other				Antibiotic/others
25	media\1411994003561.jpg	URTI	Cough							Antibiotic/others
26	media\1412067121290.jpg	URTI	Cough							Antibiotic/others
27	media\1412068880535.jpg	Pneumonia	Couigh	media\1412068908770.jpg	Pneumonia	Cough				Antibiotic/others
28	media\1412071421265.jpg	Bronchitis	Other	media\1412071448562.jpg	RTI	Other				Antibiotic/others
29	media\1412071896398.jpg	RTI	Other	media\1412071932980.jpg	RTI	Other				Antibiotic/others
30	media\1412072291300.jpg	Asthma	Other	media\1412072345001.jpg	Asthma	Other				Others
31	media\1412072452975.jpg	RTI	Other							Antibiotic
32	media\1412073063062.jpg	RTI	Other							Antibiotic/others
33	media\1412073874294.jpg	RTI	Other							Antibiotic
34	media\1412074086420.jpg	URTI	Cough/other							Antibiotic/others
35	media\1412076346549.jpg	URTI	Cough	media\1412076451463.jpg	RTI	Other				Antibiotic/others
36	media\1412082091603.jpg	RTI	Cough/other							Antibiotic/others
37	media\1412083406325.jpg	RTI	Cough/other	media\1412083451189.jpg	Other	Other				Antibiotic/others
38	media\1412150917644.jpg	RTI	Other							Antibiotic/others
39	media\1412152060713.jpg	RTI	Other							Antibiotic/others
40	media\1412152458021.jpg	Other	Other							Antibiotic/others
41	media\1412152587563.jpg	URTI	Cough/other							Antibiotic/others
42	media\1412152775413.jpg	URTI	Cough/other	media\1412152814078.jpg	RTI	Other				Antibiotic/others
43	media\1412155134968.jpg	URTI	Cough/other							Antibiotic/others
44	media\1412155559233.jpg	URTI	Cough/other							Antibiotic/others
45	media\1412155862692.jpg	RTI	Other							Antibiotic/others
46	media\1412156352470.jpg	RTI	Other							Antibiotic/others
47	media\1412156926885.jpg	RTI	Other							Antibiotic/others
48	media\1412157124717.jpg	RTI	Other							Antibiotic/others
49	media\1412157577875.jpg	RTI	Cough							Antibiotic/others
50	media\1412157596482.jpg	RTI	Cough/other	media\1412157671372.jpg	RTI	Cough				Antibiotic/others
51	media\1412158252778.jpg	RTI	Cough/other							Antibiotic/others
52	media\1412158617944.jpg	RTI	Cough	media\1412158644998.jpg	RTI	Other				Antibiotic/others
53	media\1412158832381.jpg	RTI	Other							Antibiotic/others
54	media\1412159662709.jpg	RTI	Other							Antibiotic/others
55	media\1412160143202.jpg	Other	Other	media\1412160163478.jpg	RTI	Other				Antibiotic/others
56	media\1412161074678.jpg	Asthma	Other							Antibiotic/Salbutamol tab
57	media\1412161434598.jpg	RTI	Other							Antibiotic/others
58	media\1412161881010.jpg	RTI	Other							Antibiotic/others
59	media\1412165205377.jpg	URTI	Cough/Breathlessness							Antibiotic/others
60	media\1412167026457.jpg	Other	Cough	media\1412167046007.jpg	Other	Other				Antibiotic/others
61	media\1412169669184.jpg	URTI	Cough/other							Antibiotic/others
62	media\1412237993623.jpg	RTI	Other	media\1412238024224.jpg	RTI	Other				Antibiotic/others
63	media\1412238837413.jpg	RTI	Other	media\1412238892498.jpg	Pneumonia	Cough	media\1412238918762.jpg	LRTI		Antibiotic/others
64	media\1412239270541.jpg	Pneumonia	Cough/other							Antibiotic/others
65	media\1412239488145.jpg	RTI	Other							Antibiotic/others
66	media\1412240115524.jpg	RTI	Other	media\1412240136370.jpg	RTI	Other				Antibiotic
67	media\1412241465022.jpg	Asthma	Other	media\1412241520255.jpg	Asthma	Other				Antibiotic/Salbutamol tab/Steroid
68	media\1412241595928.jpg	RTI	Cough							Antibiotic/others
69	media\1412242577180.jpg	URTI	Cough/other							Antibiotic/others
70	media\1412243939681.jpg	RTI	Cough	media\1412243971342.jpg	RTI	Cough/other				Antibiotic/others
71	media\1412244005177.jpg	URTI	Other							Antibiotic/others
72	media\1412245285176.jpg	RTI	Other							Antibiotic/others
73	media\1412245423916.jpg	RTI	Other							Antibiotic/others
74	media\1412247120181.jpg	RTI	Cough	media\1412247201494.jpg	RTI//Other	Other				Antibiotic/others
75	media\1412249069518.jpg	URTI	Other							Antibiotic/others
76	media\1412251312791.jpg	URTI	Other							Antibiotic/others
77	media\1412254753518.jpg	LRTI	Other	media\1412254787464.jpg	RTI	Cough/other				Antibiotic/others
78	media\1412255574062.jpg	RTI	Other							Antibiotic/others
79	media\1412324529905.jpg	RTI	Other							Antibiotic/others
80	media\1412327506583.jpg	RTI	Other							Antibiotic/others
81	media\1412329050403.jpg	LRTI	Other	media\1412329109584.jpg	RTI	Other				Antibiotic/others
82	media\1412331823411.jpg	RTI	Other	media\1412331850685.jpg	RTI//Other	Other				Antibiotic/others
83	media\1412585008311.jpg	URTI	Other							Antibiotic/others
84	media\1412586775470.jpg	Other	Other							Antibiotic/others
85	media\1412588592800.jpg	RTI	Other							Antibiotic/others
86	media\1412588973665.jpg	Other	Other							Antibiotic/others
87	media\1412589240519.jpg	RTI	Other							Antibiotic/others
88	media\1412589373269.jpg	RTI	Other							Antibiotic/others
89	media\1412590071216.jpg	Asthma	Other	media\1412590094920.jpg	Asthma	Other				Antibiotic/Salbutamol tab
90	media\1412590275971.jpg	RTI	Cough/other	media\1412590301089.jpg	URTI	Cough				Antibiotic/others
91	media\1412590477263.jpg	URTI	Other							Antibiotic/others
92	media\1412591372263.jpg	Tonsillitis	Other							Antibiotic/others
93	media\1412591480077.jpg	RTI	Other							Antibiotic/others
94	media\1412591702521.jpg	URTI	Cough							Antibiotic/others
95	media\1412592114555.jpg	RTI	Other							Antibiotic/others
96	media\1412594535158.jpg	RTI	Other							Antibiotic/others
97	media\1412595398622.jpg	RTI	Cough/other							Antibiotic/others
98	media\1412596238310.jpg	Asthma	Other							Salbutamol tab/Aminophylline/Steroid
99	media\1412596289757.jpg	RTI	Other							Antibiotic/others
100	media\1412596815255.jpg	RTI	Cough/other	media\1412596841537.jpg	Other	Other				Antibiotic/others
101	media\1412597382759.jpg	Bronchitis	Cough	media\1412597437323.jpg	RTI	Cough				Antibiotic/others
102	media\1412597849199.jpg	Other	Cough/other							Antibiotic/others
103	media\1412598067664.jpg	Other	Other							Antibiotic/others
104	media\1412598198183.jpg	URTI	Cough							Antibiotic/Salbutamol tab
105	media\1412599334426.jpg	Other	Cough/other							Antibiotic/others
106	media\1412602815661.jpg	RTI	Other							Antibiotic/others
107	media\1412605394372.jpg	URTI	Cough							Antibiotic/others
108	media\1412667917893.jpg	RTI	Cough/other							Antibiotic/others
109	media\1412669373221.jpg	LRTI	Other							Antibiotic/others
110	media\1412670624352.jpg	LRTI	Other							Antibiotic/others
111	media\1412670741579.jpg	Tonsillitis	Sore throat							Antibiotic/others
112	media\1412672024437.jpg	Asthma	Other	media\1412672066523.jpg	Asthma					Antibiotic/Salbutamol tab
113	media\1412672939684.jpg	RTI	Cough							Antibiotic/others
114	media\1412673458059.jpg	RTI	Other							Antibiotic/others
115	media\1412674834089.jpg	RTI	Other	media\1412674853903.jpg	RTI	Other	media\1412674943999.jpg	LRTI	Other	Antibiotic/others
116	media\1412674838954.jpg	Other	Other							Antibiotic/others
117	media\1412675471662.jpg	URTI	Other	media\1412675532753.jpg	URTI	Other				Antibiotic/others
118	media\1412676041288.jpg	RTI	Other							Antibiotic/others
119	media\1412676390162.jpg	RTI	Other							Antibiotic/others
120	media\1412676666130.jpg	URTI	Other							Others
121	media\1412677104653.jpg	RTI	Other							Antibiotic/others
122	media\1412678146127.jpg	RTI	Other				media\1412678195353.jpg	LRTI	Other	Antibiotic/others
123	media\1412678415306.jpg	RTI	Other							Antibiotic/others
124	media\1412678724208.jpg	Other	Other	media\1412678750069.jpg	RTI	Other				Antibiotic/others
125	media\1412678837042.jpg	RTI	Other							Antibiotic/others
126	media\1412678874833.jpg	RTI	Other							Antibiotic/others
127	media\1412679130642.jpg	RTI	Cough/other							Antibiotic/others
128	media\1412679206827.jpg	Pneumonia	Other							Antibiotic/others
129	media\1412680119981.jpg	Other	Other	media\1412680154667.jpg	RTI	Other	media\1412680178582.jpg	LRTI	Other	Antibiotic/others
130	media\1412680645967.jpg	RTI	Other							Antibiotic/others
131	media\1412680844564.jpg	URTI	Cough/other							Antibiotic/others
132	media\1412680971531.jpg	URTI	Other							Antibiotic/others
133	media\1412681489655.jpg	URTI	Other							Antibiotic/others
134	media\1412682032136.jpg	RTI	Other							Antibiotic/others
135	media\1412682245556.jpg	RTI	Other							Antibiotic/others
136	media\1412682943715.jpg	URTI	Other							Antibiotic/others
137	media\1412683266277.jpg	RTI	Other							Antibiotic/others
138	media\1412683829383.jpg	Pneumonia	Cough							Antibiotic/others
139	media\1412684162910.jpg	Other	Cough							Antibiotic/others
140	media\1412684444538.jpg	RTI	Cough/other							Antibiotic/others
141	media\1412686263673.jpg	RTI	Other							Antibiotic/others
142	media\1412686955901.jpg	RTI	Other							Antibiotic/others
143	media\1412687244538.jpg	RTI	Cough/other							Antibiotic/others
144	media\1412690090852.jpg	URTI	Other							Antibiotic/others
145	media\1412690718784.jpg	URTI	Cough/other							Antibiotic/others
146	media\1412758457581.jpg	RTI	Other							Antibiotic/others
147	media\1412758617232.jpg	Pneumonia	Cough/other	media\1412758710761.jpg	Pneumonia	Cough				Antibiotic/others
148	media\1412758824906.jpg	URTI	Other							Antibiotic/others
149	media\1412759159399.jpg	URTI	Other	media\1412759398938.jpg	URTI	Other	media\1412759496958.jpg	LRTI	Chest pain	Antibiotic/others
150	media\1412759233958.jpg	Pneumonia	Cough/other							Antibiotic/others
151	media\1412759857618.jpg	URTI	Other	media\1412759921251.jpg	URTI	Cough				Antibiotic/others
152	media\1412760905126.jpg	Other	Other							Antibiotic/others
153	media\1412761171624.jpg	URTI	Other							Antibiotic/others
154	media\1412762630704.jpg	RTI	Cough/other							Antibiotic/others
155	media\1412763655186.jpg	Asthma	Other	media\1412763681843.jpg	Asthma	Other	media\1412763704682.jpg	Asthma	Other	Antibiotic/Aminophyline/Steroids/others
156	media\1412766313703.jpg	RTI	Other							Antibiotic/others
157	media\1412767076445.jpg	RTI	Other							Antibiotic/others
158	media\1412841839310.jpg	LRTI	Cough							Antibiotic/others
159	media\1412844112495.jpg	URTI	Other							Antibiotic/others
160	media\1412845364608.jpg	Other	Other							Antibiotic/others
161	media\1412845481172.jpg	URTI	Other							Antibiotic/others
162	media\1412848381178.jpg	RTI	Other	media\1412848417850.jpg	RTI//Other					Antibiotic/others
163	media\1412849405019.jpg	RTI	Other							Antibiotic/others
164	media\1412850157721.jpg	RTI	Other							Antibiotic/others
165	media\1412850883370.jpg	Asthma	Other	media\1412850910467.jpg	Asthma	Other	media\1412850986290.jpg	Asthma	Other	Salbutamol tabs/others
166	media\1412852542159.jpg	URTI	Other							Antibiotic/others
167	media\1412853450304.jpg	Other	Other							Antibiotic/others
168	media\1412854776974.jpg	Asthma	Other	media\1412854799946.jpg	Asthma	Other				Antibiotic/Salbutamol tab
169	media\1412855938649.jpg	Other	Cough							Antibiotic/others
170	media\1412857448614.jpg	URTI	Other							Antibiotic/others
171	media\1412857862760.jpg	URTI	Other							Antibiotic/others
172	media\1412859075923.jpg	RTI	Other							Antibiotic/others
173	media\1412860547399.jpg	TB	Other	media\1412860574554.jpg	TB	Other				TB Drugs
174	media\1412863538552.jpg	RTI	Other	media\1412863646153.jpg	LRTI	Other				Antibiotic/others
175	media\1412930230897.jpg	URTI	Other							Antibiotic/others
176	media\1412938226040.jpg	Other	Other							Others
177	media\1412940162067.jpg	LRTI	Other							Others
178	media\1412940267386.jpg	RTI	Other							Antibiotic/others
179	media\1412941866138.jpg	RTI	Other							Antibiotic/others
180	media\1412942547185.jpg	URTI	Other							Antibiotic/others
181	media\1412944640115.jpg	RTI	Cough							Antiotic/others
182	media\1413189579428.jpg	URTI	Other							Antibiotic/others
183	media\1413191285952.jpg	RTI	Other							Antibiotic/others
184	media\1413192858245.jpg	URTI	Other							Antibiotic/others
185	media\1413193214186.jpg	RTI	Other	media\1413193258683.jpg	Other	Cough				Antibiotic/others
186	media\1413193225132.jpg	RTI	Other							Antibiotic/others
187	media\1413193363449.jpg	RTI	Other	media\1413193426523.jpg	URTI	Other				Antibiotic/others
188	media\1413193831560.jpg	Other	Other							Antibiotic/others
189	media\1413194031257.jpg	URTI	Other							Antibiotic/others
190	media\1413194211445.jpg	RTI	Other							Antibiotic/others
191	media\1413194562317.jpg	URTI	Other							Antibiotic/others
192	media\1413194929221.jpg	URTI	Other							Antibiotic/others
193	media\1413195819750.jpg	Other	Chest pain							Antibiotic/others
194	media\1413195974844.jpg	URTI	Other							Antibiotic/others
195	media\1413196893534.jpg	URTI	Other	media\1413196922574.jpg	URTI	Other				Antibiotic/others
196	media\1413197355041.jpg	URTI	Other							Antibiotic/others
197	media\1413198426188.jpg	RTI	Other							Antibiotic/others
198	media\1413198712612.jpg	Other	Cough							Antibiotic/others
199	media\1413198882319.jpg	Bronchitis	Cough							Antibiotic/others
200	media\1413200057880.jpg	RTI	Other							Antibiotic/others
201	media\1413200493169.jpg	RTI	Other							Antibiotic/others
202	media\1413202887745.jpg	URTI	Other							Antibiotic/others
203	media\1413202953318.jpg	RTI	Other							Antibiotic/others
204	media\1413204274533.jpg	URTI	Other							Antibiotic/others
205	media\1413206109297.jpg	Other	Other							Others
206	media\1413207991092.jpg	Asthma	Other	media\1413208030942.jpg	Asthma					IV Aminophylline/Salbutamol Inhaler/others
207	media\1413212117403.jpg	RTI	Other							Antibiotic/others
208	media\1413212524484.jpg	RTI	Other							Antibiotic/others
209	media\1413274391506.jpg	RTI	Other							Antibiotic/others
210	media\1413274625959.jpg	RTI	Cough/other							Antibiotic/others
211	media\1413274646432.jpg	RTI	Other							Antibiotic/others
212	media\1413275113107.jpg	RTI	Other							Antibiotic/others
213	media\1413276077261.jpg	RTI	Other							Antibiotic/others
214	media\1413276277654.jpg	URTI	Other							Antibiotic/others
215	media\1413276559374.jpg	Pneumonia	Chest pain	media\1413276579546.jpg	Pneumonia					Antibiotic/others
216	media\1413277079147.jpg	RTI	Other							Antibiotic/others
217	media\1413278179652.jpg	RTI	Chest pain				media\1413278306689.jpg	LRTI	Other	Antibiotic/others
218	media\1413278432126.jpg	Other	Other							Antibiotic/others
219	media\1413279132229.jpg	Other	Other							Antibiotic/others
220	media\1413279670275.jpg	RTI	Other							Antibiotic/others
221	media\1413280146902.jpg	Other	Cough							Antibiotic/others
222	media\1413280200498.jpg	URTI	Other							Antibiotic
223	media\1413280787305.jpg	URTI	Other	media\1413280814330.jpg	URTI	Other				Antibiotic/others
224	media\1413280816141.jpg	URTI	Other							Antibiotic/others
225	media\1413281187394.jpg	URTI	Other							Antibiotic/others
226	media\1413282293250.jpg	RTI	Other							Antibiotic/others
227	media\1413282295694.jpg	URTI	Other							Antibiotic/others
228	media\1413282770622.jpg	Other	Chest pain							Antibiotic/others
229	media\1413283282145.jpg	RTI	Other							Antibiotic/others
230	media\1413283853562.jpg	URTI	Other							Antibiotic/others
231	media\1413284018927.jpg	RTI	Other							Antibiotic/others
232	media\1413284570967.jpg	RTI	Other							Antibiotic/others
233	media\1413286114011.jpg	Other	Other							Antibiotic/others
234	media\1413287805347.jpg	Other	Cough							Antibiotic/others
235	media\1413288114995.jpg	URTI	Other							Antibiotic/others
236	media\1413289881228.jpg	Other	Chest pain							Antibiotic/others
237	media\1413291534873.jpg	URTI	Other							Antibiotic/others
238	media\1413292935577.jpg	RTI	Other							Antibiotic/others
239	media\1413360796249.jpg	Asthma	Other	media\1413360820323.jpg	RTI//Other	Other				Antibiotic/Salbutamol tabs/others
240	media\1413361938408.jpg	Other	Other							Antibiotic/others
241	media\1413362389588.jpg	URTI	Other							Antibiotic/others
242	media\1413362712305.jpg	Other	Cough							Antibiotic/others
243	media\1413362832771.jpg	URTI	Other							Antibiotic/others
244	media\1413362878149.jpg	RTI	Other							Antibiotic/others
245	media\1413363103634.jpg	Other	Other							Antibiotic/others
246	media\1413363480690.jpg	Other	Other							Others
247	media\1413363561290.jpg	URTI	Other							Antibiotic/others
248	media\1413363754674.jpg	RTI	Other							Antibiotic/others
249	media\1413364773252.jpg	Other	Other							Antibiotic/others
250	media\1413365273009.jpg	URTI	Other							Antibiotic/others
251	media\1413365705702.jpg	RTI	Other							Antibiotic/others
252	media\1413366234248.jpg	RTI	Other							Antibiotic/others
253	media\1413366588394.jpg	Other	Other							Antibiotic/others
254	media\1413367027465.jpg	Other	Cough							Antibiotic/others
255	media\1413367149667.jpg	Asthma	Other		URTI	Other				Salbutamol/Aminiphylline/others
256	media\1413367458036.jpg	RTI	Other							Antibiotic/others
257	media\1413367709405.jpg	Asthma	Other	media\1413367729700.jpg	Asthma	Other	media\1413367755466.jpg	Asthma	Other	Antibiotic/Salbutamol/Aminiphylline
258	media\1413368562888.jpg	RTI	Other							Antibiotis/others
259	media\1413369740976.jpg	RTI	Other	media\1413369753490.jpg	URTI	Other				Antibiotic/others
260	media\1413369958983.jpg	Bronchitis	Other	media\1413370078391.jpg	Pneumonia	Cough				Antibiotic/Salbutamol/others
261	media\1413370261242.jpg	Other	Cough							Antibiotic/others
262	media\1413370397142.jpg	URTI	Other							Antibiotic/others
263	media\1413371079368.jpg	Bronchitis	Cough/other							Antibiotic/others
264	media\1413371176461.jpg	URTI	Other							Antibiotic/others
265	media\1413371204573.jpg	Pneumonia	Cough/other							Antibiotic/others
266	media\1413371470374.jpg	URTI	Other							Antibiotic/others
267	media\1413371565269.jpg	RTI	Other							Antibiotic/others
268	media\1413371667027.jpg	RTI	Other							Antibiotic/others
269	media\1413372678930.jpg	RTI	Other							Antibiotic/others
270	media\1413372689403.jpg	Tonsillitis	Other							Others
271	media\1413373017881.jpg	MSP	Other							Antibiotic/others
272	media\1413373388925.jpg	Other	Other							Antibiotic/others
273	media\1413373563219.jpg	URTI	Other							Antibiotic/others
274	media\1413373634387.jpg	URTI	Other							Antibiotic/others
275	media\1413373725589.jpg	Pneumonia	Cough/other							Antibiotic/others
276	media\1413374966360.jpg	URTI	Other							Antibiotic/others
277	media\1413375144837.jpg	URTI	Other							Antibiotic/others
278	media\1413375568403.jpg	Other	Other							Antibiotic/others
279	media\1413375660135.jpg	RTI	Other							Antibiotic/others
280	media\1413375893148.jpg	RTI	Other	media\1413375922169.jpg	Tonsillitis	Other				Antibiotic/others
281	media\1413375993989.jpg	RTI	Other							Antibiotic/others
282	media\1413376211745.jpg	Other	Chest pain							Antibiotic/others
283	media\1413377569004.jpg	Bronchitis	Other							Antibiotic/others
284	media\1413378010547.jpg	RTI	Other							Antibiotic/others
285	media\1413379605859.jpg	RTI	Other							Antibiotic/others
286	media\1413381025828.jpg	RTI	Other							Antibiotic/others
287	media\1413381789994.jpg	URTI	Cough/other							Antibiotic/others
288	media\1413448167299.jpg	Pneumonia	Other							Antibiotic/others
289	media\1413448583095.jpg	RTI	Other							Antibiotic/others
290	media\1413448626738.jpg	Other	Other							Antibiotic/others
291	media\1413449068084.jpg	URTI	Other							Antibiotic/others
292	media\1413449298474.jpg	Pneumonia	Cough/other	media\1413449319370.jpg	URTI	Other	media\1413449343015.jpg	LRTI	Other	Antibiotic/others
293	media\1413449531278.jpg	Other	Other							Antibiotic/others
294	media\1413451185766.jpg	URTI	Other							Antibiotic/others
295	media\1413451217244.jpg	URTI	Other	media\1413451244146.jpg	RTI	Other				Antibiotic/others
296	media\1413451899403.jpg	URTI	Cough							Antibiotic/others
297	media\1413452729724.jpg	RTI	Other							Antibiotic/others
298	media\1413454087044.jpg	URTI	Other							Antibiotic/others
299	media\1413791132359.jpg	RTI	Other							Antibiotic/others
300	media\1413793159225.jpg	LRTI	Cough/other							Antibiotic/others
301	media\1413793342830.jpg	Pneumonia	Cough/other							Antibiotic/others
302	media\1413793362893.jpg	Other	Other							Others
303	media\1413793559814.jpg	Other	Other							Others
304	media\1413793681605.jpg	URTI	Other							Antibiotic/others
305	media\1413794031386.jpg	RTI	Cough/other							Antibiotic/others
306	media\1413794120474.jpg	URTI	Other							Others
307	media\1413794614847.jpg	Other	Other							Others
308	media\1413794963829.jpg	Other	Other							Others
309	media\1413795800398.jpg	Asthma	Other	media\1413795876309.jpg	Asthma	Other				Antibiotic/others
310	media\1413795805858.jpg	URTI	Cough							Antibiotic/others
311	media\1413796397022.jpg	RTI	Other							Antibiotic/others
312	media\1413796862495.jpg	Other	Other							Others
313	media\1413797231812.jpg	Other	Other							Others
314	media\1413797291052.jpg	Asthma	Other	media\1413797312547.jpg	Asthma					Others
315	media\1413797659277.jpg	URTI	Other							Antibiotic/others
316	media\1413797845653.jpg	RTI	Other							Antibiotic/others
317	media\1413797975053.jpg	Asthma	Other							Antibiotic/others
318	media\1413798191913.jpg	Other	Other							Antibiotic/others
319	media\1413798418941.jpg	URTI	Other	media\1413798464338.jpg	URTI	Cough				Antibiotic/others
320	media\1413798874488.jpg	URTI	Other							Antibiotic/others
321	media\1413799682598.jpg	RTI	Other							Antibiotic/others
322	media\1413799967947.jpg	LRTI	Cough							Antibiotic/others
323	media\1413801448461.jpg	RTI	Cough/other							Antibiotic/others
324	media\1413801785144.jpg	RTI	Cough/other							Antibiotic/others
325	media\1413808195698.jpg	LRTI	Other							Antibiotic/others
326	media\1413876843710.jpg	URTI	Other							Antibiotic/others
327	media\1413877321959.jpg	RTI	Other							Antibiotic/others
328	media\1413879089406.jpg	LRTI	Other							Antibiotic/others
329	media\1413879190137.jpg	Other	Other							Others
330	media\1413879344307.jpg	URTI	Cough							Antibiotic/others
331	media\1413879409279.jpg	Other	Other							Antibiotic/others
332	media\1413879609140.jpg	Other	Other							Others
333	media\1413879777842.jpg	Pneumonia	Cough/other							Antibiotic/others
334	media\1413879988352.jpg	RTI	Cough							Antibiotic/others
335	media\1413881296036.jpg	Other	Other	media\1413881321076.jpg	URTI	Cough	media\1413881361040.jpg	LRTI		Antibiotic/others
336	media\1413881453637.jpg	Other	Other							Others
337	media\1413881705049.jpg	Other	Other	media\1413881742791.jpg	Other					Antibiotic/others
338	media\1413881754465.jpg	RTI	Other							Antibiotic/others
339	media\1413882296375.jpg	LRTI	Other							Antibiotic/others
340	media\1413882669069.jpg	LRTI	Other							Antibiotic/others
341	media\1413883392943.jpg	Other	Other							Others
342	media\1413883664303.jpg	Other	Other							Others
343	media\1413883980246.jpg	URTI	Other							Others
344	media\1413885640757.jpg	RTI	Other							Others
345	media\1413885891897.jpg	Other	Other							Others
346	media\1413885932116.jpg	Asthma	Breathlessness	media\1413885959312.jpg	Asthma	Other	media\1413885988655.jpg	Asthma	Other	Antibiotic/Salbutamol/others
347	media\1413886116254.jpg	Asthma	Other							Antibiotic/Salbutamol/others
348	media\1413886799253.jpg	URTI	Other							Antibiotic/others
349	media\1413887583237.jpg	URTI	Other							Antibiotic/others
350	media\1413888206416.jpg	Other	Cough							Antibiotic/others
351	media\1413888889518.jpg	Asthma	Other	media\1413888926495.jpg	LRTI	Other				Antibiotic/Salbutamol/others
352	media\1413889127763.jpg	URTI	Other							Antibiotic/others
353	media\1413889816701.jpg	Pneumonia	Cough/Breathlessness							Antibiotic/others
354	media\1413964344865.jpg	Other	Other	media\1413964426018.jpg	Other	Other	media\1413964444859.jpg	Other	Other	Others
355	media\1413964596442.jpg	URTI	Other							Others
356	media\1413965319782.jpg	RTI	Cough/other							Antibiotic/others
357	media\1413965394129.jpg	Other	Cough	media\1413965439408.jpg	Pneumonia	Other				Antibiotic/others
358	media\1413965869765.jpg	Pneumonia	Cough/other							Antibiotic/others
359	media\1413967276281.jpg	URTI								Antibiotic/others
360	media\1413967476457.jpg	Other								Others
361	media\1413967511324.jpg	URTI								Antibiotic/others
362	media\1413967539142.jpg	Other	Chest pain							Others
363	media\1413967770135.jpg	URTI	Other							Antibiotic
364	media\1413968197529.jpg	URTI	Other							Antibiotic/others
365	media\1413970741107.jpg	Pneumonia	Other							Antibiotic/others
366	media\1413970778549.jpg	URTI	Other							Antibiotic/others
367	media\1413970966203.jpg	Other	Cough							Antibiotic/others
368	media\1413971284248.jpg	LRTI	Cough/other							Antibiotic/others
369	media\1413971813573.jpg	Other	Other							Antibiotic/others
370	media\1413972126242.jpg	Other	Other							Others
371	media\1413972416593.jpg	Other	Other							Antibiotic/others
372	media\1413973673751.jpg	URTI	Cough							Antibiotic/others
373	media\1413973878287.jpg	URTI	Other							Antibiotic
374	media\1413975786279.jpg	URTI	Other							Antibiotic/others
375	media\1413976120916.jpg	Asthma	Cough/Wheezing	media\1413976219406.jpg	Asthma	Other				Antibiotic/Salbutamol/others
376	media\1414052128936.jpg	Other	Cough							Antibiotic/others
377	media\1414060656974.jpg	Asthma	Other							Salbutamol/others
378	media\1414062531997.jpg	RTI	Cough							Antibiotic/others
379	media\1414067956136.jpg	Asthma	Other							Aminophylline/Steroids/others
380	media\1414069798196.jpg	LRTI	Cough							Antibiotic/others
381	media\1414657379792.jpg	RTI	Cough							Antibiotic/others
382	media\1414657670591.jpg	URTI	Other							Antibiotic/others
383	media\1414659118767.jpg	Other	Other				media\1414662170930.jpg	Other	Cough	Antibiotic/others
384	media\1414659325015.jpg	RTI	Cough							Antibiotic/others
385	media\1414659798960.jpg	Pneumonia	Cough/Breathlessness	media\1414659843329.jpg	Other	Chest pain/Fever				Antibiotic/others
386	media\1414660029412.jpg	URTI	Other							Antibiotic/others
387	media\1414660381438.jpg	Asthma	Cough/Breathlessness	media\1414660407962.jpg	Asthma	Other				Antibiotic/Salbutamol/others
388	media\1414660630434.jpg	URTI	Cough/Wheezing							Antibiotic/others
389	media\1414660755244.jpg	Other	Other	media\1414662375919.jpg	Other	Other				Antibiotic/others
390	media\1414660849967.jpg	URTI	Other							Antibiotic/others
391	media\1414662397356.jpg	RTI	Other							Antibiotic/others
392	media\1414662479077.jpg	RTI	Other							Antibiotic/others
393	media\1414663040490.jpg	Other	Cough/other							Antibiotic
394	media\1414663422490.jpg	URTI	Other							Antibiotic/others
395	media\1414663544747.jpg	URTI	Other							Antibiotic/others
396	media\1414663673150.jpg	URTI	Other							Antibiotic/others
397	media\1414664484311.jpg	RTI	Other							Antibiotic/others
398	media\1414666056680.jpg	RTI	Other							Antibiotic/others
399	media\1414666476152.jpg	URTI	Other							Antibiotic/others
400	media\1414667288960.jpg	RTI	Other							Antibiotic/others
401	media\1414668015019.jpg	RTI	Cough/other							Antibiotic/others
402	media\1414668125171.jpg	TB	Other	media\1414668166551.jpg	Other	Other	media\1414668179856.jpg	TB	Other	Antibiotic/TB Drugs
403	media\1414668500692.jpg	Other	Cough/other							Antibiotic/others
404	media\1414668530117.jpg	URTI	Cough/other	media\1414668572257.jpg	Other	Cough/other	media\1414668612239.jpg	Other	Other	Antibiotic/others
405	media\1414669601489.jpg	URTI	Other							Others
406	media\1414672299784.jpg	URTI	Cough/other							Antibiotic/others
407	media\1414675792093.jpg	RTI	Other							Antibiotic/others
408	media\1414742994342.jpg	URTI	Other							Antibiotic/others
409	media\1414745308105.jpg	Other	Other							Antibiotic/others
410	media\1414746318989.jpg	Other	Other							Antibiotic/others
411	media\1414748390511.jpg	RTI	Other							Antibiotic/others
412	media\1414749776023.jpg	URTI	Other							Antibiotic/others
413	media\1414749896479.jpg	RTI	Cough/other							Antibiotic/others
414	media\1414751145471.jpg	Chronic Bronchitis	Cough							Antibiotic/others
415	media\1414751427947.jpg	Other	Cough/other							Antibiotic/others
416	media\1414751475863.jpg	RTI	Other							Antibiotic/others
417	media\1414751857115.jpg	RTI	Other							Antibiotic/others
418	media\1414751917308.jpg	URTI	Other							Antibiotic/others
419	media\1414752119790.jpg	RTI	Other							Antibiotic/others
420	media\1414753293224.jpg	URTI	Other							Antibiotic/others
421	media\1414755878008.jpg	RTI	Other							Antibiotic/others
422	media\1414756252099.jpg	Other	Other							Antibiotic/others
423	media\1414757174915.jpg	RTI	Chest pain							Others
424	media\1414758768213.jpg	RTI	Cough/other							Antibiotic/others
425	media\1414760743673.jpg	RTI	Other							Antibiotic/others
426	media\1415003199807.jpg	URTI	Cough/other							Antibiotic/others
427	media\1415003833211.jpg	Asthma	Other	media\1415003850419.jpg	Pneumonia	Cough	media\1415003896010.jpg	Asthma	Other	Antibiotic/Salbutamol/others
428	media\1415005213371.jpg	RTI	Other							Antibiotic/others
429	media\1415005436795.jpg	URTI	Cough/other							Antibiotic/others
430	media\1415005709015.jpg	Other	Other							Others
431	media\1415006067207.jpg	URTI	Other							Antibiotic/others
432	media\1415009363626.jpg	URTI	Other							Antibiotic/others
433	media\1415010015598.jpg	RTI	Cough/other							Antibiotic/others
434	media\1415013266394.jpg	URTI	Other							Antibiotic/others
435	media\1415013376390.jpg	RTI	Cough							Antibiotic/others
436	media\1415014280005.jpg	Other	Other							Others
437	media\1415014946931.jpg	URTI	Other							Antibiotic/others
438	media\1415015646788.jpg	Asthma	Wheezing	media\1415015672547.jpg	Asthma	Other				Antibiotic/Salbutamol/others
439	media\1415016949794.jpg	Other	Other							Antibiotic/others
440	media\1415017019935.jpg	URTI	Cough/other	media\1415017071629.jpg	Pneumonia/Asthma	Cough	media\1415017155496.jpg	Asthma	Other	Antibiotic/Salbutamol/others
441	media\1415017244737.jpg	RTI	Cough	media\1415017262873.jpg	URTI	Cough				Antibiotic/others
442	media\1415018625472.jpg	RTI	Cough/other							Antibiotic/others
443	media\1415019334431.jpg	RTI	Other							Antbiotic/others
444	media\1415020794607.jpg	Other	Other							Antibiotic/others
445	media\1415022425114.jpg	Other	Other							Antibiotic/others
446	media\1415087285076.jpg	Pneumonia	Other							Antibiotic/others
447	media\1415087379236.jpg	RTI	Other							Antibiotic/others
448	media\1415088051406.jpg	Pneumonia	Other							Antibiotic/others
449	media\1415089437335.jpg	RTI	Other	media\1415089341068.jpg	URTI	Other				Antibiotic/others
450	media\1415089882028.jpg	URTI	Other							Antibiotic/others
451	media\1415091193877.jpg	Asthma	Other	media\1415091299740.jpg	Asthma	Other	media\1415091249806.jpg	Asthma	Other	Antibiotic/SalbutamolAminophyline
452	media\1415091896939.jpg	RTI	Other							Antibiotic/others
453	media\1415099360288.jpg	Other	Other							Antibiotic/others
454	media\1415099442954.jpg	RTI	Other							Antibiotic/others
455	media\1415101301575.jpg	Other	Other	media\1415101325138.jpg	Other	Other	media\1415101345725.jpg	LRTI	Other	Antibiotic/others
456	media\1415102304884.jpg	Asthma	Other							Antibiotic/Salbutamol/others
457	media\1415103487287.jpg	RTI	Other				media\1415103522661.jpg	LRTI	Other	Antibiotic/others
458	media\1415108125595.jpg	RTI	Other							Antibiotic/others
459	media\1415171672947.jpg	URTI	Other							Antibiotic/others
460	media\1415171975168.jpg	Other	Other							Antibiotic/others
461	media\1415173338927.jpg	URTI	Cough/other							Antibiotic/others
462	media\1415175451541.jpg	RTI	Cough/other							Antibiotic/others
463	media\1415175614755.jpg	Other	Other				media\1415175652678.jpg	Other	Other	Antibiotic/others
464	media\1415175623727.jpg	RTI	Other							Antibiotic/others
465	media\1415178724357.jpg	URTI	Other							Antibiotic/others
466	media\1415184369895.jpg	RTI	Other							Antbiotic/others
467	media\1415188053345.jpg	Other	Other							Antibiotic
468	media\1415273423102.jpg	URTI	Other				media\1415273467413.jpg	LRTI	Other	Antibiotic/others
469	media\1415273524959.jpg	URTI	Other							Antibiotic/others
470	media\1415274579488.jpg	URTI	Other							Antibiotic/others
471	media\1415276508646.jpg	URTI	Other							Antibiotic/others
472	media\1415279662699.jpg	LRTI	Chest pain							Antibiotic/others
473	media\1415281626328.jpg	URTI	Other							Antibiotic/others
474	media\1415354763751.jpg	URTI	Other							Antibiotic/others
475	media\1415355430153.jpg	URTI	Other							Antibiotic/others
476	media\1415355979302.jpg	URTI	Other							Antibiotic/others
477	media\1415356229431.jpg	URTI	Other							Antibiotic/others
478	media\1415356259904.jpg	URTI	Other							Antibiotic/others
479	media\1415357941930.jpg	Pneumonia	Cough/other							Antibiotic/others
480	media\1415358494603.jpg	URTI	Other							Antibiotic/others
481	media\1415358961712.jpg	URTI	Cough/other							Antibiotic/others
482	media\1415359458643.jpg	URTI	Other							Antibiotic/others
483	media\1415359489078.jpg	URTI	Other							Antibiotic/others
484	media\1415359616445.jpg	URTI	Other							Antibiotic/others
485	media\1415360248321.jpg	URTI	Other	media\1415360271802.jpg	URTI	Other				Antibiotic/others
486	media\1415360821488.jpg	URTI	Other							Antibiotic/others
487	media\1415362594426.jpg	Pneumonia	Cough/other							Antibiotic/others
488	media\1415368561932.jpg	URTI	Cough/other							Antibiotic/others
489	media\1415610691189.jpg	URTI	Other							Antibiotic/others
490	media\1415619065017.jpg	Asthma	Cough/other	media\1415619144113.jpg	Other	Other	media\1415619164625.jpg	LRTI	Other	Antibiotic/Salbutamol
491	media\1415619143778.jpg	URTI	Other							Antibiotic/others
492	media\1415622226787.jpg	URTI	Other							Antibiotic/others
493	media\1415622362983.jpg	URTI	Other							Antibiotic/others
494	media\1415622518523.jpg	URTI	Other							Antibiotic/others
495	media\1415623910503.jpg	URTI	Other							Antibiotic/others
496	media\1415624319677.jpg	Asthma	Other	media\1415624336707.jpg	Asthma	Other				Antibiotic/Salbutamol/others
497	media\1415626413614.jpg	Pneumonia	Other							Antibiotic/others
498	media\1415694871868.jpg	URTI	Other							Antibiotic/others
499	media\1415695951516.jpg	URTI	Other							Antibiotic/others
500	media\1415696498900.jpg	URTI	Other	media\1415696520101.jpg	URTI	Other				Antibiotic/others
501	media\1415696541302.jpg	URTI	Other							Antibiotic/others
502	media\1415697008444.jpg	URTI	Other							Antibiotic/others
503	media\1415698548482.jpg	URTI	Other							Antibiotic/others
504	media\1415699617990.jpg	URTI	Other							Antibiotic/others
505	media\1415700125357.jpg	URTI	Other							Antibiotic/others
506	media\1415701303051.jpg	URTI	Other							Antibiotic/others
507	media\1415703081546.jpg	URTI	Other							Antibiotic/others
508	media\1415703723578.jpg	URTI	Other							Antibiotic/others
509	media\1415703746605.jpg	URTI	Other							Antibiotic/others
510	media\1415703990402.jpg	URTI	Other							Antibiotic/others
511	media\1415705869971.jpg	URTI	Other							Antibiotic/others
512	media\1415706692396.jpg	URTI	Other							Antibiotic/others
513	media\1415706984925.jpg	Asthma	Other	media\1415707044940.jpg	Asthma	Other				Salbutamol/Aminophylline/others
514	media\1415707687691.jpg	URTI	Other							Antibiotic/others
515	media\1415709984185.jpg	RTI	Other							Antibiotic/others
516	media\1415710786874.jpg	Pneumonia	Other							Antibiotic/others
517	media\1415711029944.jpg	URTI	Other							Antibiotic/others
518	media\1415712134275.jpg	URTI	Other							Antibiotic/others
519	media\1415712867815.jpg	URTI	Other							Antibiotic/others
520	media\1415713503615.jpg	URTI	Other							Antibiotic/others
521	media\1415713560269.jpg	URTI	Other							Antibiotic/others
522	media\1415781187443.jpg	URTI	Other							Antibiotic/others
523	media\1415781650895.jpg	URTI	Other							Antibiotic/others
524	media\1415782212867.jpg	Pneumonia	Other							Antibiotic/others
525	media\1415783999196.jpg	URTI	Other							Antibiotic/others
526	media\1415784801635.jpg	URTI	Other							Antibiotic/others
527	media\1415785031374.jpg	URTI	Other							Antibiotic/others
528	media\1415785572377.jpg	URTI	Other							Antibiotic/others
529	media\1415785904349.jpg	URTI	Other							Antibiotic/others
530	media\1415787223722.jpg	URTI	Other							Antibiotic/others
531	media\1415787946663.jpg	URTI	Other							Antibiotic/others
532	media\1415788324960.jpg	URTI	Other							Antibiotic/others
533	media\1415789685210.jpg	URTI	Cough/other	media\1415789711367.jpg	URTI	Other				Antibiotic/others
534	media\1415790023973.jpg	RTI	Cough/other							Antibiotic/others
535	media\1415791397769.jpg	LRTI	Other							Antibiotic/others
536	media\1415791887052.jpg	URTI	Other							Antibiotic/others
537	media\1415792565872.jpg	Pneumonia	Other	media\1415792689638.jpg	URTI/Other					Antibiotic/others
538	media\1415793145673.jpg	URTI	Other							Antibiotic/others
539	media\1415793489190.jpg	URTI	Other							Antibiotic/others
540	media\1415793748882.jpg	URTI	Other							Antibiotic/others
541	media\1415794891688.jpg	Pneumonia	Chest pain							Antibiotic/others
542	media\1415795397109.jpg	URTI	Other							Antibiotic/others
543	media\1415796863357.jpg	URTI	Other							Antibiotic/others
544	media\1415798872226.jpg	URTI	Other							Antibiotic/others
545	media\1415799381760.jpg	RTI	Other	media\1415799397455.jpg	RTI	Other				Antibiotic/others
546	media\1415800418389.jpg	URTI	Other							Antibiotic/others
547	media\1415801478874.jpg	URTI	Other							Antibiotic/others
548	media\1415802113353.jpg	URTI	Other							Antibiotic/others
549	media\1415829066018.jpg	Other	Other	media\1415789540231.jpg	URTI	Other				Antibiotic/others
550	media\1415864549784.jpg	URTI	Other							Antibiotic/others
551	media\1415865105088.jpg	TB	Other	media\1415865154682.jpg	Other	Other				TB Drugs/others
552	media\1415866879032.jpg	URTI	Other							Antibiotic/others
553	media\1415867165446.jpg	URTI	Other							Antibiotic/others
554	media\1415867282216.jpg	URTI	Other							Antibiotic/others
555	media\1415867551121.jpg	URTI	Cough							Antibiotic/others
556	media\1415867601943.jpg	URTI	Other							Antibiotic/others
557	media\1415871085272.jpg	URTI	Other							Antibiotic/others
558	media\1415871261594.jpg	URTI	Cough							Antibiotic/others
559	media\1415871922549.jpg	URTI	Other							Antibiotic/others
560	media\1415872692956.jpg	URTI	Other							Antibiotic/others
561	media\1415872881001.jpg	URTI	Cough/Chest pain	media\1415872916212.jpg	URTI/Other	Other				Antibiotic/others
562	media\1415873537890.jpg	URTI	Other							Antibiotic/others
563	media\1415875222747.jpg	URTI	Other	media\1415875237812.jpg	Asthma	Other	media\1415875266850.jpg	Asthma	Other	Antibiotic/Salbutamol/others
564	media\1415875639900.jpg	URTI	Cough							Antibiotic/others
565	media\1415876416464.jpg	URTI	Other							Antibiotic/others
566	media\1415876767685.jpg	URTI	Other							Antibiotic/others
567	media\1415877494940.jpg	URTI	Other							Antibiotic/others
568	media\1415878398670.jpg	URTI	Other							Antibiotic/others
569	media\1415878976004.jpg	Other	Other							Others
570	media\1415880709273.jpg	RTI	Other	media\1415880756943.jpg	RTI	Other	media\1415880779400.jpg	LRTI	Other	Antibiotic/others
571	media\1415881643571.jpg	URTI	Other							Antibiotic/others
572	media\1415882230817.jpg	URTI	Other							Antibiotic/others
573	media\1415883756877.jpg	URTI	Other							Antibiotic/others
574	media\1415889774821.jpg	URTI	Other							Antibiotic/others
575	media\1415891166132.jpg	URTI	Other	media\1415891186612.jpg	RTI	Other	media\1415891216567.jpg	LRTI	Other	Antibiotic/others
576	media\1415952071040.jpg	URTI	Other							Antibiotic/others
577	media\1415953185646.jpg	URTI	Other	media\1415953203683.jpg	URTI	Other				Antibiotic/others
578	media\1415956205787.jpg	URTI	Other							Antibiotic/others
579	media\1415956828846.jpg	URTI	Other							Antibiotic/others
580	media\1415957458057.jpg	LRTI	Cough/other							Antibiotic/others
581	media\1415957970040.jpg	RTI	Other							Antibiotic/others
582	media\1415959619427.jpg	URTI	Other							Antibiotic/others
583	media\1415962153946.jpg	RTI	Other							Antibiotic/others
584	media\1415962744339.jpg	RTI	Other							Antibiotic/others
585	media\1415962752039.jpg	Other	Other							Antibiotic/others
586	media\1415963225555.jpg	URTI	Other							Antibiotic/others
587	media\1415964367434.jpg	URTI	Other	media\1415964389163.jpg	RTI	Other				Antibiotic/others
588	media\1415967622584.jpg	URTI	Other							Antibiotic/others
589	media\1415967646108.jpg	URTI	Other							Antibiotic/others
590	media\1415968399896.jpg	RTI	Other							Antibiotic/others
591	media\1415973805942.jpg	URTI	Other	media\1415973884952.jpg	URTI	Other				Antibiotic/others
592	media\1416215320195.jpg	URTI	Other							Antibiotic/others
593	media\1416215980035.jpg	URTI	Other							Antibiotic/others
594	media\1416217179770.jpg	URTI	Other							Antibiotic/others
595	media\1416217537839.jpg	URTI	Other							Antibiotic/others
596	media\1416217634747.jpg	Other	Other	media\1416217660457.jpg	Pneumonia	Other				Antibiotic/others
597	media\1416220074587.jpg	URTI	Other							Antibiotic/others
598	media\1416220093646.jpg	URTI	Other							Antibiotic/others
599	media\1416220799165.jpg	URTI	Other							Antibiotic/others
600	media\1416221035556.jpg	URTI	Other							Antibiotic/others
601	media\1416221418863.jpg	URTI	Other	media\1416221454415.jpg	RTI	Other				Antibiotic/others
602	media\1416222421907.jpg	URTI	Other							Antibiotic/others
603	media\1416223808679.jpg	URTI	Other							Antibiotic/others
604	media\1416224039437.jpg	URTI	Other	media\1416224106624.jpg	RTI/Others	Other				Antibiotic/others
605	media\1416225871781.jpg	URTI	Other							Antibiotic/others
606	media\1416226070290.jpg	URTI	Other							Antibiotic/others
607	media\1416228807241.jpg	URTI	Other							Antibiotic/others
608	media\1416229045712.jpg	URTI	Cough							Antibiotic/others
609	media\1416300423973.jpg	URTI	Other							Antibiotic/others
610	media\1416300634434.jpg	URTI	Other							Antibiotic/others
611	media\1416301228179.jpg	URTI	Other							Antibiotic/others
612	media\1416303187914.jpg	URTI	Other							Antibiotic/others
613	media\1416303571381.jpg	Asthma	Breathlessness							Antibiotic/SalbutamolAminophyline/other
614	media\1416304208281.jpg	URTI	Other							Antibiotic/others
615	media\1416304282804.jpg	URTI	Other							Antibiotic/others
616	media\1416305533036.jpg	URTI	Other							Antibiotic/others
617	media\1416306680999.jpg	URTI	Other							Antibiotic/others
618	media\1416306680999-2.jpg	URTI	Other							Antibiotic/others
619	media\1416306793487.jpg	URTI	Other	media\1416306846174.jpg	Pneumonia	Other				Antibiotic/others
620	media\1416308292574.jpg	Bronchitis	Other							Antibiotic/others
621	media\1416309535877.jpg	Asthma	Other							Antibiotic/Salbutamol/others
622	media\1416309640038.jpg	URTI	Other							Antibiotic/others
623	media\1416309705272.jpg	URTI	Other							Antibiotic/others
624	media\1416310661377.jpg	URTI	Other							Antibiotic/others
625	media\1416310925199.jpg	URTI	Other							Antibiotic/others
626	media\1416311155373.jpg	URTI	Other							Antibiotic/others
627	media\1416313693397.jpg	URTI	Other							Antibiotic/others
628	media\1416386721960.jpg	URTI	Other							Antibiotic/others
629	media\1416388359476.jpg	URTI	Other							Antibiotic/others
630	media\1416389694485.jpg	Other	Other							Others
631	media\1416391199645.jpg	Other	Chest pain							Others
632	media\1416392094721.jpg	URTI	Other	media\1416392113759.jpg	URTI	Other				Antibiotic/others
633	media\1416393828771.jpg	URTI	Cough							Antibiotic/others
634	media\1416393978970.jpg	Other	Other							Antibiotic/others
635	media\1416394006191.jpg	URTI	Other	media\1416394079479.jpg	URTI	Other				Antibiotic/others
636	media\1416394749322.jpg	URTI	Other							Antibiotic/others
637	media\1416394909786.jpg	URTI	Other							Antibiotic/others
638	media\1416396044564.jpg	URTI	Cough							Antibiotic/others
639	media\1416397181101.jpg	URTI	Other							Antibiotic/others
640	media\1416397877964.jpg	URTI	Other							Antibiotic/others
641	media\1416402053794.jpg	URTI	Cough/other	media\1416402078146.jpg	URTI	Cough/other				Antibiotic/others
642	media\1416403172271.jpg	URTI	Cough/other							Antibiotic/others
643	media\1416406777377.jpg	URTI	Other							Antibiotic/others
644	media\1416472761358.jpg	URTI	Other							Antibiotic/others
645	media\1416472953018.jpg	Pneumonia	Other	media\1416472976978.jpg	URTI	Cough/other				Antibiotic/others
646	media\1416473537104.jpg	URTI	Cough/other							Antibiotic/others
647	media\1416474040658.jpg	URTI	Cough/other							Antibiotic/others
648	media\1416474206243.jpg	URTI	Cough							Antibiotic/others
649	media\1416474613781.jpg	URTI	Other							Antibiotic/others
650	media\1416475025685.jpg	URTI	Other							Antibiotic/others
651	media\1416476273880.jpg	RTI	Cough/other							Antibiotic/others
652	media\1416476969003.jpg	URTI	Other							Antibiotic/others
653	media\1416477561631.jpg	URTI	Cough/other							Antibiotic/others
654	media\1416478193403.jpg	URTI	Other							Antibiotic/others
655	media\1416478921985.jpg	URTI	Other							Antibiotic/others
656	media\1416479894924.jpg	URTI	Other							Antibiotic/others
657	media\1416482651773.jpg	URTI	Cough							Antibiotic/others
658	media\1416485680717.jpg	URTI	Cough							Antibiotic/others
659	media\1416486622138.jpg	URTI	Cough							Antibiotic/others
660	media\1416486630518.jpg	Asthma	Other	media\1416486699535.jpg	Asthma	Other				Antibiotic/Salbutamol/others
661	media\1416488386497.jpg	URTI	Other							Antibiotic/others
662	media\1416488871720.jpg	URTI	Cough							Antibiotic/others
663	media\1416489973239.jpg	URTI	Other							Antibiotic/others
664	media\1416490590690.jpg	URTI	Other	media\1416490612062.jpg	Pneumonia	Cough				Antibiotic/others
665	media\1416491406540.jpg	Pneumonia	Chest pain							Antibiotic/others
666	media\1416494837147.jpg	RTI	Other							Antibiotic/others
667	media\1416562670090.jpg	URTI	Cough	media\1416562682604.jpg	URTI	Other				Antibiotic/others
668	media\1416563170357.jpg	Asthma	Cough/Breathlessness	media\1416563188279.jpg	Asthma	Other	media\1416563227204.jpg	Asthma	Other	Antibiotic/Salbutamol/others
669	media\1416563210981.jpg	URTI	Cough/other							Antibiotic/others
670	media\1416564468745.jpg	URTI	Cough/other							Antibiotic/others
671	media\1416564849851.jpg	URTI	Other	media\1416564920572.jpg	URTI/Other	Cough/other				Antibiotic/others
672	media\1416566172555.jpg	Other	Other							Antibiotic/others
673	media\1416567259365.jpg	URTI	Other							Antibiotic/others
674	media\1416567542564.jpg	URTI	Cough/other							Antibiotic/others
675	media\1416567985761.jpg	Asthma	Other	media\1416568039894.jpg	Asthma	Other	media\1416568062515.jpg	Asthma	Other	Antibiotic/Salbutamol/others
676	media\1416569305027.jpg	RTI	Other							Antibiotic/others
677	media\1416569434680.jpg	URTI	Other							Antibiotic/others
678	media\1416571505710.jpg	URTI	Cough/other							Antibiotic/others
679	media\1416571653051.jpg	URTI	Other							Antibiotic/others
680	media\1416572365002.jpg	RTI	Other							Antibiotic/others
681	media\1416573774437.jpg	URTI	Cough/other							Antibiotic/others
682	media\1416574359417.jpg	URTI	Other	media\1416574437544.jpg	URTI	Other	media\1416574458491.jpg	LRTI	Other	Antibiotic/others
683	media\1416821207081.jpg	URTI	Other							Antibiotic/others
684	media\1416821265673.jpg	Other	Other							Antibiotic/others
685	media\1416821386126.jpg	URTI	Cough							Antibiotic/others
686	media\1416822675314.jpg	URTI	Other							Antibiotic/others
687	media\1416823066889.jpg	URTI	Other							Antibiotic/others
688	media\1416830396260.jpg	Other	Other							Antibiotic/others
689	media\1416833815898.jpg	URTI	Chest pain	media\1416833851800.jpg	Pneumonia	Other				Antibiotic/others
690	media\1416834170856.jpg	URTI	Cough/other							Antibiotic/others
691	media\1416836851770.jpg	URTI	Cough							Antibiotic/others
692	media\1416902417339.jpg	URTI	Other							Antibiotic/others
693	media\1416904643936.jpg	URTI	Cough/other							Antibiotic/others
694	media\1416904987163.jpg	Other	Other							Antibiotic/others
695	media\1416905094976.jpg	URTI	Cough/other							Antibiotic/others
696	media\1416906608852.jpg	Other	Other							Antibiotic/others
697	media\1416906906185.jpg	Other	Other	media\1416906955210.jpg	Pneumonia	Other				Antibiotic/others
698	media\1416907326900.jpg	Other	Other							Antibiotic/others
699	media\1416907326900-2.jpg	Other	Other							Antibiotic/others
700	media\1416908560856.jpg	URTI	Other							Antibiotic/others
701	media\1416909444590.jpg	URTI	Cough/other	media\1416909533006.jpg	Other	Other	media\1416909612844.jpg	LRTI	Chestpain/others	Antibiotic/others
702	media\1416909672612.jpg	LRTI	Other							Antibiotic/others
703	media\1416910589124.jpg	LRTI	Other							Antibiotic/others
704	media\1416912196777.jpg	URTI	Other							Antibiotic/others
705	media\1416913673044.jpg	LRTI	Other							Antibiotic/others
706	media\1416913972579.jpg	URTI	Other	media\1416913987503.jpg	URTI	Other				Antibiotic/others
707	media\1416915177162.jpg	Pneumonia	Cough/other							Antibiotic/others
708	media\1416915177162-2.jpg	Pneumonia	Cough/other							Antibiotic/others
709	media\1416915446124.jpg	URTI	Other							Antibiotic/others
710	media\1416915557314.jpg	URTI	Other							Antibiotic/others
711	media\1416918642089.jpg	URTI	Cough	media\1416918684005.jpg	URTI	Other	media\1416918719685.jpg	LRTI	Other	Antibiotic/others
712	media\1416918952017.jpg	URTI	Cough	media\1416918970361.jpg	URTI	Cough				Antibiotic/others
713	media\1416919592852.jpg	URTI	Other							Antibiotic/others
714	media\1416919869922.jpg	URTI	Cough/other							Antibiotic/others
715	media\1416920126637.jpg	URTI	Other							Antibiotic/others
716	media\1416920194946.jpg	RTI	Other							Antibiotic/others
717	media\1416989555635.jpg	URTI	Other							Antibiotic/others
718	media\1416990602803.jpg	URTI	Other							Antibiotic/others
719	media\1416990740569.jpg	Pneumonia	Other							Antibiotic/others
720	media\1416991471183.jpg	Pneumonia	Other							Antibiotic/others
721	media\1416993226677.jpg	URTI	Other							Antibiotic/others
722	media\1416993226677-2.jpg	URTI	Other							Antibiotic/others
723	media\1416993877920.jpg	URTI	Other							Antibiotic/others
724	media\1416993968017.jpg	Pneumonia	Chest pain							Antibiotic/others
725	media\1416994074876.jpg	Asthma	Other							Salbutamol/others
726	media\1416995060862.jpg	URTI	Other							Antibiotic/others
727	media\1416995333106.jpg	URTI	Cough/other							Antibiotic/others
728	media\1416995823251.jpg	URTI	Other							Antibiotic/others
729	media\1416996417662.jpg	URTI	Other							Antibiotic/others
730	media\1416996813245.jpg	URTI	Other							Antibiotic/others
731	media\1416997540287.jpg	URTI	Other							Antibiotic/others
732	media\1416997886925.jpg	Other	Other							Antibiotic/others
733	media\1416998222935.jpg	Other	Cough	media\1416998255028.jpg	RTI	Cough				Antibiotic/others
734	media\1416998222935-2.jpg	Other	Cough	media\1416998255028-2.jpg	RTI	Cough				Antibiotic/others
735	media\1416998238295.jpg	Pneumonia	Other							Antibiotic/others
736	media\1417000931811.jpg	URTI	Other	media\1417000943971.jpg	Other	Cough/other				Antibiotic/others
737	media\1417001204783.jpg	Other	Cough							Antibiotic/others
738	media\1417002857254.jpg	URTI	Other							Antibiotic/others
739	media\1417005018431.jpg	URTI	Other							Antibiotic/others
740	media\1417005547520.jpg	Pneumonia	Other							Antibiotic/others
741	media\1417006550099.jpg	Asthma	Other	media\1417006571130.jpg	Asthma	Other				Antibiotic/Salbutamol/Aminophylline/others
742	media\1417078076844.jpg	URTI	Other							Antibiotic/others
743	media\1417080112940.jpg	URTI	Other							Antibiotic/others
744	media\1417080368704.jpg	Other	Other							Antibiotic/others
745	media\1417080490202.jpg	URTI	Other	media\1417080506094.jpg	URTI	Other				Antibiotic/others
746	media\1417080911093.jpg	Pneumonia	Chest pain							Antibiotic/others
747	media\1417081245281.jpg	URTI	Cough							Antibiotic/others
748	media\1417082346959.jpg	Other	Other							Antibiotic/others
749	media\1417082458586.jpg	Pneumonia	Other							Antibiotic/others
750	media\1417084408660.jpg	URTI	Other							Antibiotic/others
751	media\1417086173472.jpg	URTI	Other							Antibiotic/others
752	media\1417086825295.jpg	LRTI	Other							Antibiotic/others
753	media\1417087268948.jpg	LRTI	Other							Antibiotic/others
754	media\1417087268948-2.jpg	LRTI	Other							Antibiotic/others
755	media\1417088032238.jpg	URTI	Other							Antibiotic/others
756	media\1417088623748.jpg	URTI	Other							Antibiotic/others
757	media\1417089184487.jpg	RTI	Other							Antibiotic/others
758	media\1417089395055.jpg	URTI	Cough/other							Antibiotic/others
759	media\1417091782098.jpg	URTI	Other							Antibiotic/others
760	media\1417094177826.jpg	URTI	Other							Antibiotic/others
761	media\1417095193309.jpg	URTI	Other							Antibiotic/others
762	media\1417095262692.jpg	URTI	Cough/other							Antibiotic/others
763	media\1417165447765.jpg	RTI	Cough/other							Antibiotic/others
764	media\1417165479603.jpg	URTI	Other							Antibiotic/others
765	media\1417165822774.jpg	URTI	Other							Antibiotic/others
766	media\1417165888588.jpg	RTI	Other							Antibiotic/others
767	media\1417166496506.jpg	URTI	Other							Antibiotic/others
768	media\1417166831212.jpg	URTI	Other							Antibiotic/others
769	media\1417167270692.jpg	Pneumonia	Other							Antibiotic/others
770	media\1417167591178.jpg	RTI	Other							Antibiotic/others
771	media\1417167896007.jpg	RTI	Breathlessness	media\1417167932953.jpg	Asthma	Other				Salbutamol/Aminophylline/others
772	media\1417168091932.jpg	URTI	Other							Antibiotic/others
773	media\1417168263692.jpg	Pneumonia	Other							Antibiotic/others
774	media\1417168945618.jpg	URTI	Cough							Antibiotic/others
775	media\1417169015380.jpg	URTI	Other							Antibiotic/others
776	media\1417169112123.jpg	URTI	Other							Antibiotic/others
777	media\1417169840311.jpg	URTI	Other							Antibiotic/others
778	media\1417171411343.jpg	Asthma	Other				media\1417171464756.jpg	Asthma	Other	Antibiotic/Salbutamol/others
779	media\1417171731792.jpg	URTI	Other							Antibiotic/others
780	media\1417172522210.jpg	URTI	Other							Antibiotic/others
781	media\1417172948806.jpg	URTI	Other							Antibiotic/others
782	media\1417174094321.jpg	RTI	Other							Antibiotic/others
783	media\1417174679753.jpg	RTI	Other							Antibiotic/others
784	media\1417175507835.jpg	RTI	Other							Antibiotic/others
785	media\1417176059242.jpg	Pneumonia	Other	media\1417176072457.jpg	URTI	Cough				Antibiotic/others
786	media\1417424674375.jpg	URTI	Other							Antibiotic/others
787	media\1417425571330.jpg	URTI	Other							Antibiotic/others
788	media\1417426097518.jpg	Pneumonia	Other							Antibiotic/others
789	media\1417426119267.jpg	Pneumonia	Other	media\1417426165794.jpg	Pneumonia	Other				Antibiotic/others
790	media\1417428580719.jpg	URTI	Other							Antibiotic/others
791	media\1417430047659.jpg	URTI	Other	media\1417430060214.jpg	URTI	Other				Antibiotic/others
792	media\1417430139747.jpg	Pneumonia	Other							Antibiotic/others
793	media\1417430856140.jpg	URTI	Other							Antibiotic/others
794	media\1417431844506.jpg	URTI	Other	media\1417431860892.jpg	URTI	Other				Antibiotic/others
795	media\1417434015918.jpg	URTI	Other							Antibiotic/others
796	media\1417436428494.jpg	Pneumonia	Other							Antibiotic/others
797	media\1417436624030.jpg	URTI	Other							Antibiotic/others
798	media\1417437930407.jpg	URTI	Other							Antibiotic/others
799	media\1417438225180.jpg	RTI	Cough/other	media\1417438252857.jpg	Other	Other				Antibiotic/others
800	media\1417439277476.jpg	Pneumonia	Other							Antibiotic/others
801	media\1417439501301.jpg	URTI	Other							Antibiotic/others
802	media\1417441119923.jpg	Pneumonia	Other							Antibiotic/others
803	media\1417508781414.jpg	RTI	Other	media\1417508809872.jpg	RTI	Other				Antibiotic/others
804	media\1417511352938.jpg	URTI	Other							Antibiotic/others
805	media\1417514590346.jpg	URTI	Other							Antibiotic/others
806	media\1417514838004.jpg	Pneumonia	Other							Antibiotic/others
807	media\1417515075196.jpg	URTI	Cough/other							Antibiotic/others
808	media\1417516277122.jpg	RTI	Cough							Antibiotic/others
809	media\1417518520277.jpg	URTI	Cough							Antibiotic/others
810	media\1417518844125.jpg	URTI	Other							Antibiotic/others
811	media\1417523266830.jpg	URTI	Cough							Antibiotic/others
812	media\1417525956859.jpg	URTI	Cough							Antibiotic/others
813	media\1417527174539.jpg	URTI	Other							Antibiotic/others
814	media\1417528015408.jpg	URTI	Other							Antibiotic/others
815	media\1417528529671.jpg	RTI	Cough	media\1417528558182.jpg	Other	Cough				Antibiotic/others
816	media\1417605125940.jpg	URTI	Cough							Antibiotic/others
817	media\1417605487036.jpg	Pneumonia	Other							Antibiotic/others
818	media\1417607751280.jpg	URTI	Cough/other							Antibiotic/others
819	media\1417608001572.jpg	RTI	Other							Antibiotic/others
820	media\1417609189435.jpg	RTI	Other							Antibiotic/others
821	media\1417609207165.jpg	URTI	Cough/other							Antibiotic/others
822	media\1417609227260.jpg	URTI	Cough/other							Antibiotic/others
823	media\1417610114434.jpg	Other	Other							Antibiotic/others
824	media\1417610290006.jpg	URTI	Other							Antibiotic/others
825	media\1417611330277.jpg	RTI	Other							Antibiotic/others
826	media\1417612725027.jpg	URTI	Other							Antibiotic/others
827	media\1417681517368.jpg	URTI	Other							Antibiotic/others
828	media\1417684467870.jpg	URTI	Other							Antibiotic/others
829	media\1417684503466.jpg	Other	Cough/other	media\1417684540298.jpg	URTI	Other				Antibiotic/others
830	media\1417687767505.jpg	RTI	Cough/other							Antibiotic/others
831	media\1417687857114.jpg	RTI	Other							Antibiotic/others
832	media\1417688148172.jpg	Other	Other							Antibiotic/others
833	media\1417688926964.jpg	URTI	Other	media\1417688971795.jpg	URTI	Cough				Antibiotic/others
834	media\1417689060734.jpg	URTI	Other							Antibiotic/others
835	media\1417690142454.jpg	URTI	Cough/other							Antibiotic/others
836	media\1417690833395.jpg	RTI	Other							Antibiotic/others
837	media\1417691460515.jpg	URTI	Other							Antibiotic/others
838	media\1417691600029.jpg	RTI	Other							Antibiotic/others
839	media\1417692190359.jpg	RTI	Other							Antibiotic/others
840	media\1417692224962.jpg	Other	Other							Antibiotic/others
841	media\1417692669557.jpg	Pneumonia	Cough/other							Antibiotic/others
842	media\1417693018067.jpg	RTI	Other							Antibiotic/others
843	media\1417693441378.jpg	RTI	Other							Antibiotic/others
844	media\1417694437782.jpg	Other	Other							Antibiotic/others
845	media\1417694497586.jpg	URTI	Other							Antibiotic/others
846	media\1417694926482.jpg	RTI	Other							Antibiotic/others
847	media\1417698300939.jpg	RTI	Other							Antibiotic/others
848	media\1417707049238.jpg	URTI	Other							Antibiotic/others
849	media\1417767547346.jpg	URTI	Other							Antibiotic/others
850	media\1417771653809.jpg	RTI	Other	media\1417771668763.jpg	RTI	Cough/other				Antibiotic/others
851	media\1417774398914.jpg	URTI	Chest pain	media\1417774416335.jpg	URTI	Other				Antibiotic/others
852	media\1417775438807.jpg	URTI	Other							Antibiotic/others
853	media\1417775514279.jpg	RTI	Other							Antibiotic/others
854	media\1417775779494.jpg	RTI	Cough	media\1417775846090.jpg	URTI	Cough				Antibiotic/others
855	media\1417776188859.jpg	URTI	Cough/other							Antibiotic/others
856	media\1417779845025.jpg	RTI	Other							Antibiotic/others
857	media\1417780208614.jpg	URTI	Other							Antibiotic/others
858	media\1417780690687.jpg	Asthma	Other	media\1417780726016.jpg	Asthma	Cough/Breathlessness	media\1417780789881.jpg	Other	Other	Antibiotic/Salbutamol/Steroids/others
859	media\1417781001730.jpg	RTI	Other							Antibiotic/others
860	media\1417781660633.jpg	RTI	Other	media\1417781719461.jpg	Pneumonia	Cough				Antibiotic/others
861	media\1417781706687.jpg	Other	Other							Antibiotic/others
862	media\1417782903279.jpg	URTI	Other							Antibiotic/others
863	media\1417782970857.jpg	URTI	Cough/other							Antibiotic/others
864	media\1417784197243.jpg	Other	Other							Antibiotic/others
865	media\1417784507851.jpg	Other	Other							Antibiotic/others
866	media\1417786180633.jpg	URTI	Other							Antibiotic/others
867	media\1417786499120.jpg	Pneumonia	Cough/other							Antibiotic/others
868	media\1418029413670.jpg	URTI	Other							Antibiotic/others
869	media\1418031305185.jpg	Other	Other							Antibiotic/others
870	media\1418031779357.jpg	Other	Cough/other	media\1418031810487.jpg	Other	Cough				Antibiotic/others
871	media\1418031979761.jpg	URTI	Other							Antibiotic/others
872	media\1418035595522.jpg	URTI	Other							Antibiotic/others
873	media\1418037527830.jpg	URTI	Other							Antibiotic/others
874	media\1418037844099.jpg	Pneumonia	Chest pain							Antibiotic/others
875	media\1418038092494.jpg	URTI	Other							Antibiotic/others
876	media\1418038639398.jpg	URTI	Other							Antibiotic/others
877	media\1418041904132.jpg	URTI	Cough/other	media\1418041940494.jpg	URTI/other	Cough/other				Antibiotic/others
878	media\1418042335370.jpg	URTI	Other							Antibiotic/others
879	media\1418113457323.jpg	Pneumonia	Other	media\1418113474691.jpg	Pneumonia/Other	Other				Antibiotic/others
880	media\1418114996643.jpg	URTI	Other	media\1418115020356.jpg	URTI	Other	media\1418115050501.jpg	LRTI	Other	Antibiotic/others
881	media\1418116180185.jpg	Pneumonia	Cough/other							Antibiotic/others
882	media\1418116627011.jpg	URTI	Cough/other							Antibiotic/others
883	media\1418116889902.jpg	Pneumonia	Other	media\1418116926573.jpg	Pneumonia/Other	other	media\1418116974499.jpg	Other	Cough	Antibiotic/others
884	media\1418116956626.jpg	Other	Cough/other							Antibiotic/others
885	media\1418118626214.jpg	URTI	Other							Antibiotic/others
886	media\1418119674406.jpg	RTI	Other							Antibiotic/others
887	media\1418119822153.jpg	Other	Chest pain							Antibiotic/others
888	media\1418120588360.jpg	URTI	Cough/other							Antibiotic/others
889	media\1418120657593.jpg	Asthma	Cough/Breathlessness							Antibiotic/others
890	media\1418121080153.jpg	Pneumonia	Cough/other							Antibiotic/others
891	media\1418121275799.jpg	URTI	Other							Antibiotic/others
892	media\1418121333102.jpg	Pneumonia	Chest pain	media\1418121360848.jpg	URTI	Other				Antibiotic/others
893	media\1418121584514.jpg	URTI	Cough	media\1418121626454.jpg	URTI/other	Cough/other	media\1418121667875.jpg	Other	URTI	Antibiotic/others
894	media\1418124316514.jpg	RTI	Other							Antibiotic/others
895	media\1418197785399.jpg	Pneumonia	Chest pain							Antibiotic/others
896	media\1418201268763.jpg	Other	Cough							Antibiotic/others
897	media\1418202444143.jpg	Pneumonia	Other							Antibiotic/others
898	media\1418202524553.jpg	URTI	Cough/other							Antibiotic/others
899	media\1418202682502.jpg	URTI	Other							Antibiotic/others
900	media\1418202910438.jpg	RTI	Cough							Antibiotic/others
901	media\1418203120598.jpg	Pneumonia	Cough							Antibiotic/others
902	media\1418203267337.jpg	Pneumonia	Cough	media\1418203289270.jpg	URTI	Other	media\1418203308424.jpg	LRTI	Other	Antibiotic/others
903	media\1418204046731.jpg	LRTI	Other	media\1418204105207.jpg	URTI/other	Other	media\1418204114850.jpg	LRTI	Chestpain	Antibiotic/others
904	media\1418204117554.jpg	URTI	Other							Antibiotic/others
905	media\1418204686478.jpg	Pneumonia	Other							Antibiotic/others
906	media\1418205177162.jpg	RTI	Cough/other							Antibiotic/others
907	media\1418205666609.jpg	Pneumonia	Cough	media\1418205694391.jpg	Asthma	Other				Antibiotic/others
908	media\1418207467883.jpg	URTI	Other							Antibiotic/others
909	media\1418208212458.jpg	URTI	Other							Antibiotic/others
910	media\1418208440148.jpg	URTI	Other	media\1418208498462.jpg	URTI	Cough	media\1418208514376.jpg	LRTI	Other	Antibiotic/others
911	media\1418209585984.jpg	URTI	Other							Antibiotic/others
912	media\1418209639133.jpg	URTI	Other							Antibiotic/others
913	media\1418209840831.jpg	URTI	Cough/other							Antibiotic/others
914	media\1418210406982.jpg	URTI	Cough	media\1418210429790.jpg	URTI	Other				Antibiotic/others
915	media\1418210691895.jpg	URTI	Cough							Antibiotic/others
916	media\1418211517585.jpg	Asthma	Other							Antibiotic/Salbutamol/others
917	media\1418211774586.jpg	URTI	Cough/other							Antibiotic/others
918	media\1418213706734.jpg	Pneumonia	Other							Antibiotic/others
919	media\1418214507988.jpg	Other	Other	media\1418214522256.jpg	Other	Other				Antibiotic/others
920	media\1418284186484.jpg	URTI	Other							Antibiotic/others
921	media\1418284671834.jpg	RTI	Cough/other	media\1418284691845.jpg	URTI	Cough/other	media\1418284716954.jpg	LRTI	Cough/Other	Antibiotic/others
922	media\1418285003292.jpg	URTI	Cough/other							Antibiotic/others
923	media\1418286086107.jpg	URTI	Other							Antibiotic/others
924	media\1418286439697.jpg	URTI	Other							Antibiotic/others
925	media\1418286526081.jpg	Other	Other							Antibiotic/others
926	media\1418286896923.jpg	RTI	Cough/other	media\1418286940446.jpg	URTI	Other				Antibiotic/others
927	media\1418288272302.jpg	Asthma	Other							Antibiotic/Salbutamol/others
928	media\1418288295142.jpg	URTI	Other							Antibiotic/others
929	media\1418288518666.jpg	Pneumonia	Other							Antibiotic/others
930	media\1418289065967.jpg	URTI	Other							Antibiotic/others
931	media\1418289189043.jpg	Asthma	Other	media\1418289229733.jpg	URTI/other	other				Antibiotic/others
932	media\1418289912648.jpg	Pneumonia	Other							Antibiotic/others
933	media\1418289932217.jpg	Asthma	Other	media\1418289950962.jpg	Asthma	Cough	media\1418290059549.jpg	LRTI	Cough	Antibiotic/others
934	media\1418290615283.jpg	URTI	Cough							Antibiotic/others
935	media\1418290959426.jpg	URTI	Cough	media\1418290987322.jpg	URTI	Other				Antibiotic/others
936	media\1418292932921.jpg	URTI	Cough							Antibiotic/others
937	media\1418293111094.jpg	URTI	Cough/Chest							Antibiotic/others
938	media\1418293264502.jpg	RTI	Cough/other							Antibiotic/others
939	media\1418293963969.jpg	URTI	Other							Antibiotic/others
940	media\1418297440585.jpg	URTI	Other							Antibiotic/others
941	media\1418297546880.jpg	URTI	Cough/other							Antibiotic/others
942	media\1418298098266.jpg	Other	Cough	media\1418298113610.jpg	URTI	Other	media\1418298146959.jpg	LRTI	Chest pain	Antibiotic/others
943	media\1418298226332.jpg	Other	Other							Antibiotic/others
944	media\1418299430898.jpg	URTI	Other							Antibiotic/others
945	media\1418301134017.jpg	LRTI	Other							Antibiotic/others
946	media\1418372959009.jpg	Other	Breathlessness/Cough	media\1418372970208.jpg	URTI/other	Other	media\1418372994125.jpg	TB	Other	Antibiotic/others
947	media\1418373089559.jpg	Other	Other							Antibiotic/others
948	media\1418374821635.jpg	Other	Other							Antibiotic/others
949	media\1418377875656.jpg	URTI	Cough							Antibiotic/others
950	media\1418379157123.jpg	URTI	Chest pain							Antibiotic/others
951	media\1418379861271.jpg	Other	Other							Antibiotic/others
952	media\1418379882174.jpg	Pneumonia	Chest pain							Antibiotic/others
953	media\1418382639214.jpg	Other	Cough							Antibiotic/others
954	media\1418384407961.jpg	Other	Cough/other							Antibiotic/others
955	media\1418387046028.jpg	URTI	Cough/other	media\1418387059006.jpg	URTI	Cough/other				Antibiotic/others
956	media\1418387240936.jpg	RTI	Other							Antibiotic/others
957	media\1418387684460.jpg	Pneumonia	Chest pain	media\1418387718526.jpg	URTI	Other				Antibiotic/others
958	media\1418388175473.jpg	Pneumonia	Other							Antibiotic/others
959	media\1418388797754.jpg	URTI	Cough/other							Antibiotic/others
960	media\1418389356071.jpg	Pneumonia	Chest pain							Antibiotic/others
961	media\1418390243018.jpg	URTI	Other							Antibiotic/others
962	media\1418630559271.jpg	Pneumonia	Cough/other							Antibiotic/others
963	media\1418630616583.jpg	URTI	Other							Antibiotic/others
964	media\1418631400802.jpg	URTI	Cough							Antibiotic/others
965	media\1418632147003.jpg	URTI	Cough							Antibiotic/others
966	media\1418633025375.jpg	URTI	Cough							Antibiotic/others
967	media\1418634491605.jpg	Pneumonia	Cough/other							Antibiotic/others
968	media\1418635565072.jpg	Pneumonia	Other	media\1418635585080.jpg	URTI	Other				Antibiotic/others
969	media\1418635877768.jpg	URTI	Other							Antibiotic/others
970	media\1418636466641.jpg	Other	Other							Antibiotic/others
971	media\1418637165707.jpg	Other	Chest pain	media\1418637193136.jpg	URTI	Cough	media\1418637209886.jpg	Other	Cough	Antibiotic/others
972	media\1418637570317.jpg	Other	Cough	media\1418637603780.jpg	URTI	Cough/other				Antibiotic/others
973	media\1418637850641.jpg	URTI	Other	media\1418637867198.jpg	URTI	Other	media\1418637899643.jpg	LRTI	Other	Antibiotic/others
974	media\1418638343342.jpg	URTI	Other							Antibiotic/others
975	media\1418639853069.jpg	Other	Other							Antibiotic/others
976	media\1418640180343.jpg	Pneumonia	Other	media\1418640373381.jpg	Other	Other				Antibiotic/others
977	media\1418640545375.jpg	URTI	Other							Antibiotic/others
978	media\1418641723171.jpg	URTI	Other							Antibiotic/others
979	media\1418642828918.jpg	Pneumonia	Other	media\1418642852409.jpg	Pneumonia	other				Antibiotic/others
980	media\1418644589446.jpg	URTI	Other							Antibiotic/others
981	media\1418645833980.jpg	URTI	Other							Antibiotic/others
982	media\1418647510324.jpg	Asthma	Other	media\1418647568509.jpg	Asthma	Other	media\1418647597157.jpg	Asthma	Other	Antibiotic/Salbutamol/others
983	media\1418648831381.jpg	Pneumonia	Cough/other							Antibiotic/others
984	media\1418718199196.jpg	Pneumonia	Other							Antibiotic/others
985	media\1418719615572.jpg	Other	Other							Antibiotic/others
986	media\1418720013545.jpg	Pneumonia	Cough/other							Antibiotic/others
987	media\1418720228623.jpg	URTI	Other							Antibiotic/others
988	media\1418720393229.jpg	URTI	Cough							Antibiotic/others
989	media\1418722336055.jpg	URTI	Other							Antibiotic/others
990	media\1418723488841.jpg	Asthma	Other	media\1418723525255.jpg	Asthma	Other				Salbutamol/Aminophylline
991	media\1418724003396.jpg	RTI	Cough/other							Antibiotic/others
992	media\1418724303702.jpg	Pneumonia	Chest pain							Antibiotic/others
993	media\1418727198452.jpg	Other	Other							Antibiotic/others
994	media\1418729373058.jpg	URTI	Other							Antibiotic/others
995	media\1418730357681.jpg	Pneumonia	Other	media\1418730383206.jpg	RTI	Other				Antibiotic/others
996	media\1418731405536.jpg	URTI	Cough							Antibiotic/others
997	media\1418733308094.jpg	URTI	Other							Antibiotic/others
998	media\1418803093808.jpg	URTI	Other							Antibiotic/others
999	media\1418806895080.jpg	URTI	Cough/other	media\1418806917761.jpg	Pneumonia	Other				Antibiotic/others
1000	media\1418807763659.jpg	Pneumonia	Cough/other	media\1418807799506.jpg	Other	Other	media\1418807860463.jpg	LRTI	Other	Antibiotic/Salbutamol/others
1001	media\1418809775587.jpg	Pneumonia	Chest pain							Antibiotic/others
1002	media\1418810315682.jpg	Asthma	Other	media\1418810335026.jpg	Asthma	Other	media\1418810355905.jpg	Asthma	Other	Antibiotic/Salbutamol/others
1003	media\1418810839847.jpg	Other	Other							Antiretroviral drugs
1004	media\1418816662944.jpg	URTI	Other	media\1418816676361.jpg	URTI	Cough/other				Antibiotic/others
1005	media\1418820888829.jpg	URTI	Other							Antibiotic/others
1006	media\1418823015049.jpg	Other	Other							Antibiotic/others
1007	media\1418824232151.jpg	URTI	Other	media\1418824265635.jpg	RTI	Cough/other				Antibiotic/others
1008	media\1418824993590.jpg	Pneumonia	Cough/other	media\1418825014247.jpg						Antibiotic/others
1009	media\1418825707076.jpg	Other	Other							Antibiotic/others
1010	media\1418889980282.jpg	Other	Cough/other							Antibiotic/others
1011	media\1418890748475.jpg	URTI	Other	media\1418890781648.jpg	URTI	Other	media\1418890803882.jpg	LRTI	Cough/Other	Antibiotic/others
1012	media\1418891210845.jpg	URTI	Other	media\1418891283792.jpg	URTI	Cough	media\1418891308376.jpg	LRTI	Cough/Other	Antibiotic/others
1013	media\1418893801455.jpg	URTI	Other	media\1418893823827.jpg	URTI	Other	media\1418893848825.jpg	LRTI	Other	Antibiotic/others
1014	media\1418894196840.jpg	URTI	Cough							Antibiotic/others
1015	media\1418896585652.jpg	URTI	Other							Antibiotic/others
1016	media\1418903582421.jpg	Other	Other							Aminophylline/others
1017	media\1418904395572.jpg	Asthma	Cough/breathlessness/others							Antibiotic/others
1018	media\1418906002512.jpg	URTI	Other							Antibiotic/others
1019	media\1418907819510.jpg	Pneumonia	Other							Antibiotic/others
1020	media\1418908887638.jpg	URTI	Cough/other							Antibiotic/others
1021	media\1418911122517.jpg	URTI	Cough/other	media\1418911144803.jpg	URTI/other	Other				Antibiotic/others
1022	media\1418911197581.jpg	Other	Other	media\1418911230843.jpg	Other	Other				Antiretroviral drugs
1023	media\1418981651121.jpg	Other	Other	media\1418981677683.jpg	Other	Other				Others
1024	media\1418988269615.jpg	RTI	Other							Antibiotic/others
1025	media\1418989668033.jpg	URTI	Other							Antibiotic/others
1026	media\1419064776921.jpg	Other	Other							Antibiotic/others
1027	media\1419066841238.jpg	RTI	Other							Antibiotic/others
1028	media\1419067774310.jpg	Pneumonia	Other							Antibiotic/others
1029	media\1419068556622.jpg	RTI	Other							Antibiotic/others
1030	media\1419068952561.jpg	URTI	Chest pain							Antibiotic/others
1031	media\1419070221894.jpg	URTI	Other							Antibiotic/others
1032	media\1419072285909.jpg	Other	Other							Antibiotic/others
1033	media\1419072577888.jpg	Other	Other	media\1419072593360.jpg	Other	Other				Antiretroviral drugs
1034	media\1419073194866.jpg	RTI	Other							Antibiotic/others
1035	media\1419074337367.jpg	Other	Other	media\1419074352622.jpg	Other	Other				Antibiotic/others
1036	media\1419239683400.jpg	Pneumonia	Other							Antibiotic/others
1037	media\1419241375693.jpg	Other	Chest pain							Antibiotic/others
1038	media\1419241977661.jpg	Pneumonia	Other	media\1419241999939.jpg	Pneumonia	Other				Antibiotic/others
1039	media\1419242447304.jpg	RTI	Other							Antibiotic/others
1040	media\1419243720159.jpg	URTI	Other							Antibiotic/others
1041	media\1419243720641.jpg	Pneumonia	Cough/other							Antibiotic/others
1042	media\1419248392757.jpg	Pneumonia	Other	media\1419248430578.jpg	URTI/other	Other	media\1419248461676.jpg	Other	Other	Antibiotic/others
1043	media\1419248989926.jpg	Other	Other							Antibiotic/others
1044	media\1419250454936.jpg	URTI	Cough							Antibiotic/others
1045	media\1419250480531.jpg	URTI	Other							Antibiotic/others
1046	media\1419324930494.jpg	Pneumonia	Cough/other	media\1419324941614.jpg	Other	Cough	media\1419324984126.jpg	LRTI	Other	Antibiotic/others
1047	media\1419329789899.jpg	Pneumonia	Cough/other	media\1419329821710.jpg	RTI	Other	media\1419329839748.jpg	Other	Other	Antibiotic/others
1048	media\1419331335414.jpg	URTI	Other							Antibiotic/others
1049	media\1419331996028.jpg	URTI	Cough							Antibiotic/others
1050	media\1419332599583.jpg	RTI	Cough/other							Antibiotic/others
1051	media\1419333088451.jpg	URTI	Other							Antibiotic
1052	media\1419333942251.jpg	RTI	Other							Antibiotic/others
1053	media\1419335183552.jpg	Asthma	Other							Antibiotic/Salbutamol/others
1054	media\1419336202591.jpg	URTI	Other							Antibiotic/others
1055	media\1419336273650.jpg	URTI	Other							Antibiotic/others
1056	media\1419337751232.jpg	URTI	Cough/other	media\1419337781551.jpg	URTI/other	Other				Antibiotic/others
1057	media\1419841862824.jpg	Pneumonia	Cough/other							Antibiotic/others
1058	media\1419842598688.jpg	Asthma	Cough							Antibiotic/Salbutamol/others
1059	media\1419842966126.jpg	Other	Other							Antibiotic/others
1060	media\1419843369930.jpg	Other	Other							Antibiotic/others
1061	media\1419847816112.jpg	Other	Cough							Antibiotic/others
1062	media\1419848612879.jpg	Asthma	Other	media\1419848642760.jpg	Asthma	Other				Salbutamol/Aminophylline/others
1063	media\1419849692059.jpg	URTI	Other	media\1419849720840.jpg	URTI/other	Cough/other	media\1419849777408.jpg	LRTI	Cough/Other	Antibiotic/others
1064	media\1419849698138.jpg	URTI	Other	media\1419849747098.jpg	URTI/other	Cough				Antibiotic/others
1065	media\1419851028521.jpg	URTI	Other							Antibiotic/others
1066	media\1419851938446.jpg	URTI	Other							Antibiotic/others
1067	media\1419853286909.jpg	RTI	Other	media\1419853300287.jpg	Other	Other				Antibiotic/others
1068	media\1419856933231.jpg	RTI	Cough							Antibiotic/others
1069	media\1419857240044.jpg	URTI	Cough							Antibiotic/others
1070	media\1419858733339.jpg	URTI	Other	media\1419858755381.jpg	URTI	Other				Antibiotic/others
1071	media\1419860901881.jpg	URTI	Other							Antibiotic/others
1072	media\1419926567370.jpg	Other	Other							Antibiotic/others
1073	media\1419928617112.jpg	Other	Chest pain							Antibiotic/others
1074	media\1419929243197.jpg	RTI	Other							Antibiotic/others
1075	media\1419929422806.jpg	URTI	Other							Antibiotic/others
1076	media\1419930829647.jpg	Other	Other							Antibiotic/others
1077	media\1419931390175.jpg	Asthma	Other							Antibiotic/Salbutamol/others
1078	media\1419931566395.jpg	URTI	Cough/other							Antibiotic/others
1079	media\1419931638210.jpg	Other	Other							Antibiotic/others
1080	media\1419933099272.jpg	Other	Other							Antibiotic/others
1081	media\1419933434556.jpg	Other	Other							Others
1082	media\1419934187525.jpg	Other	Cough							Antibiotic/others
1083	media\1419934216006.jpg	URTI	Other							Antibiotic/others
1084	media\1419938002986.jpg	URTI	Cough/other	media\1419938019238.jpg	URTI/other	Other				Antibiotic/others
1085	media\1419939340783.jpg	RTI	Other							Antibiotic/others
1086	media\1419941150742.jpg	URTI	Other							Antibiotic/others
1087	media\1419941329719.jpg	RTI	Other							Antibiotic/others
1088	media\1419943077860.jpg	URTI	Other							Antibiotic/others
1089	media\1420015225319.jpg	RTI	Other							Antibiotic/others
1090	media\1420016938346.jpg	RTI	Chest pain							Antibiotic/others
1091	media\1420016957616.jpg	Other	Chest pain	media\1420016984491.jpg	Asthma/Pneumonia	Other				Antibiotic/others
1092	media\1420017490618.jpg	RTI	Other							Antibiotic/others
1093	media\1420017920821.jpg	URTI	Other							Antibiotic/others
1094	media\1420020304329.jpg	URTI	Other	media\1420020336812.jpg	URTI	Other	media\1420020390365.jpg	LRTI	Other	Antibiotic/others
1095	media\1420021040651.jpg	URTI	Other							Antibiotic/others
1096	media\1420021290615.jpg	RTI	Cough	media\1420021352348.jpg	RTI	Other				Antibiotic/others
1097	media\1420021804718.jpg	Other	Other							Antibiotic/others
1098	media\1420023016370.jpg	Other	Other							Antibiotic/others
1099	media\1420023470591.jpg	Other	Other							Antibiotic/others
1100	media\1420024360476.jpg	Other	Other							Antibiotic/others
1101	media\1420025241258.jpg	URTI	Other							Antibiotic/others
1102	media\1420025330621.jpg	URTI	Other							Antibiotic/others
1103	media\1420026932460.jpg	URTI	Cough							Antibiotic/others
1104	media\1420027153368.jpg	RTI	Other							Antibiotic/others
1105	media\1420028363325.jpg	URTI	Other							Antibiotic/others
1106	media\1420454191663.jpg	Other	Other							Antibiotic/others
1107	media\1420454663965.jpg	URTI	Other							Antibiotic/others
1108	media\1420457397048.jpg	RTI	Other							Antibiotic/others
1109	media\1420458329694.jpg	RTI	Chest pain							Antibiotic/others
1110	media\1420459297603.jpg	URTI	Other	media\1420459499107.jpg	Pneumonia/others	Cough/other	media\1420459522529.jpg	LRTI	Cough	Antibiotic/Salbutamol/others
1111	media\1420460329227.jpg	Other	Other							Antibiotic/others
1112	media\1420461957364.jpg	Pneumonia	Other							Antibiotic/others
1113	media\1420463395521.jpg	Asthma	Other	media\1420463448517.jpg	Asthma	Other	media\1420463473151.jpg	Asthma	Other	Antibiotic/Aminophylline/others
1114	media\1420464177320.jpg	URTI	Other							Antibiotic/others
1115	media\1420467497064.jpg	URTI	Other							Antibiotic
1116	media\1420467803607.jpg	RTI	Other							Antibiotic/others
1117	media\1420533497351.jpg	Other	Other	media\1420533540443.jpg	Pneumonia/others	Other				Antibiotic/others
1118	media\1420534273237.jpg	RTI	Other							Antibiotic/others
1119	media\1420537394123.jpg	Other	Other							Antibiotic/others
1120	media\1420537450836.jpg	Pneumonia	Chest pain							Antibiotic/others
1121	media\1420537455268.jpg	RTI	Other							Antibiotic/others
1122	media\1420538875351.jpg	RTI	Other							Antibiotic/others
1123	media\1420539999255.jpg	Asthma	Other	media\1420540024034.jpg	Asthma	Other	media\1420540048477.jpg	Asthma	Other	Salbutamol/Aminophylline/others
1124	media\1420541327042.jpg	URTI	Other							Antibiotic/others
1125	media\1420542196543.jpg	RTI	Other							Antibiotic/others
1126	media\1420542465267.jpg	RTI	Other							Antibiotic/others
1127	media\1420542735520.jpg	RTI	Other							Antibiotic/others
1128	media\1420542763085.jpg	Other	Other	media\1420542804147.jpg	URTI/other	Other				Antibiotic/others
1129	media\1420544919239.jpg	Pneumonia	Other							Antibiotic/others
1130	media\1420546124463.jpg	URTI	Cough							Antibiotic/others
1131	media\1420548376918.jpg	Other	Cough/other	media\1420548407533.jpg	RTI	Cough/other				Antibiotic/others
1132	media\1420549182809.jpg	RTI	Other							Antibiotic/others
1133	media\1420549540144.jpg	RTI	Other	media\1420549562607.jpg	URTI	Other	media\1420549585454.jpg	LRTI	Other	Antibiotic/Aminophylline/other
1134	media\1420551058702.jpg	URTI	Other							Antibiotic/others
1135	media\1420623374783.jpg	RTI	Other							Antibiotic/others
1136	media\1420623562593.jpg	URTI	Other							Antibiotic/others
1137	media\1420623799444.jpg	RTI	Other							Antibiotic/others
1138	media\1420627564972.jpg	URTI	Other							Antibiotic/others
1139	media\1420629167655.jpg	URTI	Cough/other							Antibiotic/others
1140	media\1420630829087.jpg	URTI	Other							Antibiotic
1141	media\1420632034965.jpg	URTI	Other							Antibiotic
1142	media\1420636405582.jpg	URTI	Other	media\1420636445519.jpg	Other	Other	media\1420636505057.jpg	Bronchitis	Cough/Breathlessness	Antibiotic/Salbutamol/others
1143	media\1420637637018.jpg	RTI	Other							Antibiotic/others
1144	media\1420642005099.jpg	RTI	Other							Antibiotic/others
1145	media\1420725495371.jpg	URTI	Other							Antibiotic/others
1146	media\1420793984193.jpg	Asthma	Other							Salbutamol/others
1147	media\1420800706838.jpg	URTI	Other							Antibiotic/others
1148	media\1420801165475.jpg	Other	Other	media\1420801178241.jpg	URTI	Other				Antibiotic/others
1149	media\1420802100200.jpg	URTI	Other							Antibiotic/others
1150	media\1420887679675.jpg	URTI	Cough/other							Antibiotic/others
1151	media\1420890145683.jpg	RTI	Other							Antibiotic/others
1152	media\1420900770794.jpg	RTI	Other							Antibiotic/others
1153	media\1420905099458.jpg	RTI	Other							Antibiotic/others
1154	media\1421056736238.jpg	RTI	Other							Antibiotic/others
1155	media\1421057433951.jpg	RTI	Other							Antibiotic/others
1156	media\1421059303365.jpg	Pneumonia	Other							Antibiotic/others
1157	media\1421059441161.jpg	Pneumonia	Other	media\1421059453563.jpg	URTI	Other				Antibiotic/others
1158	media\1421060685940.jpg	Other	Cough/other							Antibiotic/others
1159	media\1421060808727.jpg	URTI	Cough/other							Antibiotic/others
1160	media\1421061140449.jpg	Pneumonia	Other							Antibiotic/others
1161	media\1421061637560.jpg	URTI	Other							Antibiotic/others
1162	media\1421062266665.jpg	RTI	Other							Antibiotic/others
1163	media\1421062931557.jpg	URTI	Cough/other	media\1421062973338.jpg	Other	Other				Antibiotic/others
1164	media\1421063449981.jpg	URTI	Other							Antibiotic/others
1165	media\1421063666110.jpg	Pneumonia	Other							Antibiotic/others
1166	media\1421063680868.jpg	Bronchitis	Other	media\1421063716547.jpg	URTI	Other	media\1421063752771.jpg	LRTI	Other	Antibiotic/others
1167	media\1421064462885.jpg	URTI	Other							Antibiotic/others
1168	media\1421064955138.jpg	RTI	Other							Antibiotic/others
1169	media\1421065191880.jpg	URTI	Other							Antibiotic/others
1170	media\1421068034323.jpg	Other	Other	media\1421068069522.jpg	Other	Other				Others
1171	media\1421068976130.jpg	Asthma	Other							Antibiotic/Salbutamol
1172	media\1421136903193.jpg	Pneumonia	Cough/Breathlessness	media\1421136939095.jpg	Bronchitis	Other	media\1421136962803.jpg	LRTI	Other	Antibiotic/others
1173	media\1421138466790.jpg	Other	Cough							Antibiotic/others
1174	media\1421139700216.jpg	Pneumonia	Other							Antibiotic/others
1175	media\1421140975116.jpg	URTI	Other							Antibiotic/others
1176	media\1421141336451.jpg	URTI	Other							Antibiotic/others
1177	media\1421142669113.jpg	RTI	Other	media\1421142705934.jpg	Other	Other	media\1421142745730.jpg	LRTI	Other	Antibiotic/others
1178	media\1421142727272.jpg	RTI	Other							Antibiotic/others
1179	media\1421143172016.jpg	Other	Cough/other	media\1421143183590.jpg	Pneumonia	Other				Antibiotic/others
1180	media\1421144265291.jpg	URTI	Other							Antibiotic/others
1181	media\1421145445351.jpg	URTI	Cough	media\1421145502555.jpg	URTI	Cough	media\1421145525201.jpg	LRTI	Cough	Antibiotic/others
1182	media\1421146593235.jpg	URTI	Other							Antibiotic/others
1183	media\1421147471903.jpg	RTI	Other							Antibiotic/others
1184	media\1421151908384.jpg	Bronchitis	Other							Antibiotic/others
1185	media\1421153506913.jpg	Other	Other							Antibiotic/others
1186	media\1421223974481.jpg	Other	Other	media\1421224024906.jpg	Other	Other	media\1421224068811.jpg	LRTI	Other	Antibiotic/others
1187	media\1421224559723.jpg	Bronchitis	Other							Antibiotic/others
1188	media\1421225274679.jpg	Pneumonia	Cough/other							Antibiotic/others
1189	media\1421225576450.jpg	RTI	Other							Antibiotic/others
1190	media\1421225783587.jpg	URTI	Other							Antibiotic/others
1191	media\1421226789714.jpg	RTI	Other							Antibiotic/others
1192	media\1421227172603.jpg	RTI	Other							Antibiotic/others
1193	media\1421227964404.jpg	Bronchitis	Other	media\1421227988957.jpg	Bronchitis	Other				Antibiotic/others
1194	media\1421228068335.jpg	Asthma	Cough							Antibiotic/others
1195	media\1421228155523.jpg	Pneumonia	Other							Antibiotic/others
1196	media\1421228510085.jpg	Pneumonia	Other							Antibiotic/others
1197	media\1421228644204.jpg	Asthma	Other	media\1421228664097.jpg	Other	Other				Antibiotic/Salbutamol/others
1198	media\1421228674494.jpg	URTI	Other							Antibiotic/others
1199	media\1421228756046.jpg	URTI	Other							Antibiotic/others
1200	media\1421230472828.jpg	URTI	Other							Antibiotic/others
1201	media\1421230581943.jpg	URTI	Other							Antibiotic/others
1202	media\1421230767595.jpg	URTI	Other							Antibiotic/others
1203	media\1421232320033.jpg	Other	Other							Antibiotic/others
1204	media\1421232400043.jpg	Pneumonia	Other							Antibiotic/others
1205	media\1421234682405.jpg	Other	Other							Antibiotic/others
1206	media\1421310211247.jpg	RTI	Cough							Antibiotic/others
1207	media\1421312593578.jpg	RTI	Other	media\1421312636249.jpg	RTI	Other	media\1421312657645.jpg	LRTI	Cough	Antibiotic/others
1208	media\1421313023979.jpg	Pneumonia	Cough/other							Antibiotic/others
1209	media\1421313399844.jpg	Pneumonia	Other							Antibiotic/others
1210	media\1421314701759.jpg	Other	Other							Antibiotic/others
1211	media\1421314765763.jpg	RTI	Other							Antibiotic/others
1212	media\1421316116383.jpg	URTI	Other							Antibiotic/others
1213	media\1421316238728.jpg	RTI	Cough							Antibiotic/others
1214	media\1421318302407.jpg	RTI	Other							Antibiotic/others
1215	media\1421318643826.jpg	URTI	Other	media\1421318665851.jpg	RTI	Other				Antibiotic/others
1216	media\1421319558895.jpg	URTI	Cough/other	media\1421319572198.jpg	URTI	Cough/Other				Antibiotic/others
1217	media\1421319928462.jpg	Asthma	Cough/other							Antibiotic/Salbutamol/others
1218	media\1421319991317.jpg	URTI	Other							Antibiotic/others
1219	media\1421320108927.jpg	Pneumonia	Other							Antibiotic/others
1220	media\1421321164262.jpg	URTI	Other							Antibiotic/others
1221	media\1421321504923.jpg	URTI	Other	media\1421321523811.jpg	RTI/Other	Other	media\1421321547641.jpg	LRTI	Other	Antibiotic/others
1222	media\1421322049651.jpg	URTI	Other							Antibiotic/others
1223	media\1421322177957.jpg	Asthma	Other							Antibiotic/Salbutamol/others
1224	media\1421322882624.jpg	Pneumonia	Other							Antibiotic/others
1225	media\1421322905360.jpg	Asthma	Other	media\1421322931602.jpg	Asthma	Other				Antibiotic/Salbutamol/others
1226	media\1421324595252.jpg	Other	Other							Antibiotic/others
1227	media\1421324716071.jpg	Other	Cough/other	media\1421324761379.jpg	Bronchitis	Other	media\1421324799035.jpg	Bronchitis	Other	Antibiotic/Steroid/others
1228	media\1421325169672.jpg	URTI	Other	media\1421325183363.jpg	URTI/other	Other				Antibiotic/others
1229	media\1421331323868.jpg	Other	Other							Antibiotic/others
1230	media\1421655903814.jpg	URTI	Other							Antibiotic/others
1231	media\1421657562346.jpg	URTI	Other							Antibiotic/others
1232	media\1421658240181.jpg	URTI	Other							Antibiotic/others
1233	media\1421658437144.jpg	RTI	Other							Antibiotic
1234	media\1421659423129.jpg	RTI	Other							Antibiotic/others
1235	media\1421660165393.jpg	Asthma	Other							Antibiotic/Salbutamol/others
1236	media\1421661656594.jpg	Other	Other							Antibiotic
1237	media\1421662336901.jpg	Pneumonia	Other							Antibiotic/others
1238	media\1421662639950.jpg	Other	Other							Antibiotic/others
1239	media\1421663562093.jpg	URTI	Other							Antibiotic/others
1240	media\1421664982823.jpg	URTI	Cough/other							Antibiotic/others
1241	media\1421665867283.jpg	Other	Other	media\1421665917540.jpg	Pneumonia/others	Cough/Other				Antibiotic/others
1242	media\1421667338094.jpg	URTI	Other							Antibiotic/others
1243	media\1421668011208.jpg	Other	Other							Antibiotic/others
1244	media\1421668025355.jpg	URTI	Other							Antibiotic/others
1245	media\1421668770560.jpg	TB	Other	media\1421668796854.jpg	Other	Other	media\1421668830506.jpg	Other	Other	TB Drugs/others
1246	media\1421671106417.jpg	URTI	Other							Antibiotic/others
1247	media\1421671597199.jpg	URTI	Other							Antibiotic/others
1248	media\1421674933807.jpg	Pneumonia	Other							Antibiotic/others
1249	media\1421829081423.jpg	RTI	Other							Antibiotic/others
1250	media\1421831302303.jpg	RTI	Cough							Antibiotic/others
1251	media\1421831661382.jpg	Other	Other							Antibiotic/others
1252	media\1421831806645.jpg	URTI	Other							Antibiotic/others
1253	media\1421832544241.jpg	Pneumonia	Cough/other	media\1421832574928.jpg	Pneumonia/others	Other				Antibiotic/others
1254	media\1421834666653.jpg	RTI	Other							Antibiotic/others
1255	media\1421836197095.jpg	Other	Other							Antibiotic/others
1256	media\1421839015413.jpg	RTI	Other							Antibiotic/others
1257	media\1421840014405.jpg	RTI	Other	media\1421840040211.jpg	Other	Other				Antibiotic/others
1258	media\1421841107256.jpg	Pneumonia	Chest pain	media\1421841143342.jpg	URTI/other	Cough/Other	media\1421841898236.jpg	Other	Other	Antibiotic/Steroids/Others
1259	media\1421841169190.jpg	RTI	Other							Antibiotic/others
1260	media\1421842390281.jpg	RTI	Other							Antibiotic/others
1261	media\1421843639096.jpg	RTI	Other							Antibiotic/others
1262	media\1421844140454.jpg	RTI	Other							Antibiotic/others
1263	media\1421925368782.jpg	Other	Cough							Antibiotic/others
1264	media\1421925997056.jpg	Other	Other							Antibiotic/others
1265	media\1421928067237.jpg	Bronchitis	Other							Antibiotic/others
1266	media\1421929488134.jpg	URTI	Other							Antibiotic/others
1267	media\1421929830006.jpg	RTI	Other	media\1421929844018.jpg	Other	Other				Antibiotic/others
1268	media\1421931881698.jpg	Pneumonia	Cough/other							Antibiotic/others
1269	media\1421932052133.jpg	Pneumonia	Other							Antibiotic
1270	media\1421932231887.jpg	URTI	Other							Antibiotic/others
1271	media\1422004869973.jpg	Pneumonia	Cough/other							Antibiotic/others
1272	media\1422005206709.jpg	URTI	Cough/other							Antibiotic/others
1273	media\1422005430401.jpg	URTI	Cough/other							Antibiotic/others
1274	media\1422005706128.jpg	URTI	Other							Antibiotic/others
1275	media\1422008802753.jpg	Other	Other							Antibiotic/others
1276	media\1422011292931.jpg	Pneumonia	Other							Antibiotic
1277	media\1422012419621.jpg	Pneumonia	Other							Antibiotic/others
1278	media\1422012737896.jpg	URTI	Other							Antibiotic/others
1279	media\1422012906605.jpg	Asthma	Other	media\1422012918639.jpg	Asthma	Other				Antibiotic/Salbutamol/others
1280	media\1422013098545.jpg	Other	Other	media\1422013116692.jpg	Other	Other				Antibiotic/others
1281	media\1422015119293.jpg	RTI	Cough							Antibiotic/others
1282	media\1422018226782.jpg	Bronchitis	Other							Antibiotic/others
1283	media\1422264779009.jpg	Pneumonia	Other	media\1422264812500.jpg	Pneumonia	Other	media\1422264849850.jpg	LRTI	Other	Antibiotic/others
1284	media\1422266970127.jpg	URTI	Cough/other	media\1422266982513.jpg	Other	Other				Antibiotic/others
1285	media\1422269395998.jpg	Asthma	Other	media\1422269438247.jpg	Asthma	Other	media\1422269462425.jpg	Asthma	Other	Antibiotic/SalbutamolAminophyline/others
1286	media\1422273337725.jpg	Other	Other							Antibiotic/others
1287	media\1422274029761.jpg	Other	Cough/other							Antibiotic/others
1288	media\1422275204355.jpg	URTI	Other							Antibiotic/others
1289	media\1422278255333.jpg	URTI	Cough/other							Antibiotic/others
1290	media\1422279370537.jpg	RTI	Other							Antibiotic/others
1291	media\1422284675527.jpg	RTI	Cough/Breathlessness							Antibiotic/others
1292	media\1422285297900.jpg	URTI	Other	media\1422285308197.jpg	URTI	Other				Antibiotic/others
1293	media\1422286235619.jpg	Asthma	Other	media\1422286268893.jpg	Asthma	Other	media\1422286386129.jpg	Asthma	Other	Antibiotic/Salbutamol/others
1294	media\1422365674785.jpg	URTI	Other							Antibiotic/others
1295	media\1422370889025.jpg	URTI	Other							Antibiotic/others
1296	media\1422436747380.jpg	Pneumonia	Cough/Breathlessness							Antibiotic/Salbutamol/others
1297	media\1422436798285.jpg	URTI	Other							Others
1298	media\1422438265449.jpg	RTI	Cough/other							Antibiotic/others
1299	media\1422438290145.jpg	URTI	Other							Antibiotic/others
1300	media\1422441583406.jpg	URTI	Cough/other							Antibiotic/others
1301	media\1422443239514.jpg	RTI	Cough/other							Antibiotic/others
1302	media\1422443482546.jpg	Pneumonia	Cough/other							Antibiotic/others
1303	media\1422444040093.jpg	RTI	Other							Antibiotic/others
1304	media\1422445104244.jpg	URTI	Cough/other							Antibiotic/others
1305	media\1422446013553.jpg	URTI	Cough							Antibiotic/others
1306	media\1422447226705.jpg	Other	Other							Antibiotic/others
1307	media\1422447467347.jpg	URTI	Other							Antibiotic/others
1308	media\1422447622956.jpg	Pneumonia	Cough/other							Antibiotic/others
1309	media\1422448326378.jpg	Pneumonia	Cough/other							Antibiotic/others
1310	media\1422448999556.jpg	Asthma	Other							Antibiotic/Salbutamol/others
1311	media\1422449280195.jpg	Other	Other							Antibiotic/others
1312	media\1422449429804.jpg	Pneumonia	Cough/other							Antibiotic/others
1313	media\1422449847419.jpg	Asthma	Other	media\1422449906133.jpg	Asthma	Cough/Breathlessness				Antibiotic/Salbutamol/Steroid/Aminophylline
1314	media\1422451407328.jpg	Pneumonia	Cough/other							Antibiotic/others
1315	media\1422452991300.jpg	Asthma	Cough/other	media\1422453033176.jpg	Asthma/other	Other				Antibiotic/Salbutamol/Aminophylline/others
1316	media\1422453237152.jpg	Other	Cough/other	media\1422453261767.jpg	Pneumonia	Other				Antibiotic/others
1317	media\1422524027391.jpg	Other	Other							Others
1318	media\1422525341719.jpg	Pneumonia	Other							Antibiotic/others
1319	media\1422527747388.jpg	RTI	Other							Antibiotic/others
1320	media\1422530302803.jpg	RTI	Cough							Antibiotic/others
1321	media\1422531635043.jpg	URTI	Other							Antibiotic/others
1322	media\1422531797029.jpg	Asthma	Other							Antibiotic/Salbutamol/others
1323	media\1422532108030.jpg	Other	Other							Aminophylline/others
1324	media\1422532590909.jpg	URTI	Other							Antibiotic/others
1325	media\1422533010598.jpg	URTI	Other							Antibiotic/others
1326	media\1422533494056.jpg	Asthma	Brealthlessness/other	media\1422533516235.jpg	Pneumonia/others	Other	media\1422533550948.jpg	Other	Chest pain	Antibiotic/Salbutamol/others
1327	media\1422534572636.jpg	Asthma	Cough/Breathlessness							Antibiotic/Salbutamol/Steroids/others
1328	media\1422534659786.jpg	RTI	Cough/other							Antibiotic/others
1329	media\1422535115346.jpg	URTI	Other							Antibiotic/others
1330	media\1422538527332.jpg	Pneumonia	Cough/other							Antibiotic/others
1331	media\1422538594887.jpg	Pneumonia	Cough/other							Antibiotic/others
1332	media\1422608216215.jpg	Asthma	Other							Antibiotic/Salbutamol/others
1333	media\1422610742682.jpg	Pneumonia	Chest pain							Antibiotic/others
1334	media\1422612939284.jpg	Pneumonia	Cough/other							Antibiotic/others
1335	media\1422616183619.jpg	RTI	Cough/other							Antibiotic/others
1336	media\1422618177505.jpg	RTI	Other							Antibiotic/others
1337	media\1422619662615.jpg	URTI	Other	media\1422619682541.jpg	URTI	Other				Antibiotic/others
1338	media\1422620407265.jpg	URTI	Cough/other							Antibiotic/others
1339	media\1422620921291.jpg	Asthma	Other							Salbutamol
1340	media\1422624138674.jpg	Pneumonia	Cough/other							Antibiotic/others
1341	media\1422626363553.jpg	URTI	Cough/other							Antibiotic/others
1342	media\1422626769635.jpg	URTI	Other							Antibiotic/others
1343	media\1422875774145.jpg	Pneumonia	Cough/other							Antibiotic/others
1344	media\1422876635598.jpg	RTI	Other							Antibiotic/others
1345	media\1422877648312.jpg	RTI	Cough/other							Antibiotic/others
1346	media\1422877692731.jpg	URTI	Other							Antibiotic/others
1347	media\1422879248045.jpg	Asthma	Other	media\1422879270091.jpg	URTI	Other	media\1422879286694.jpg	LRTI	Other	Antibiotic/Aminophylline/others
1348	media\1422881130419.jpg	URTI	Other							Antibiotic/others
1349	media\1422881213998.jpg	RTI	Other	media\1422881242604.jpg	LRTI	Cough/Other				Antibiotic/others
1350	media\1422882669587.jpg	Other	Other							Antibiotic/others
1351	media\1422883650512.jpg	Asthma	Other	media\1422883684069.jpg	URTI/other	Other	media\1422883720275.jpg	Asthma	Other	Antibiotic/Salbutamol/others
1352	media\1422883671566.jpg	URTI	Other							Antibiotic/others
1353	media\1422957679547.jpg	RTI	Other							Antibiotic/Steroids/Others
1354	media\1422957891973.jpg	Asthma	Cough/Breathlessness							Antibiotic/Salbutamol/others
1355	media\1422959011352.jpg	Pneumonia	Other							Antibiotic/others
1356	media\1422960399708.jpg	URTI	Cough/other							Antibiotic/others
1357	media\1422967201958.jpg	URTI	Cough/other							Antibiotic/others
1358	media\1422967405550.jpg	Asthma	Other							Antibiotic/Salbutamol/Steroid
1359	media\1423041047761.jpg	URTI	Other							Antibiotic/others
1360	media\1423041518201.jpg	Other	Other							Antibiotic/others
1361	media\1423041877665.jpg	URTI	Cough/other							Antibiotic/others
1362	media\1423042551245.jpg	URTI	Cough/other							Antibiotic/others
1363	media\1423043244622.jpg	Asthma	Other	media\1423043278885.jpg	Asthma	Other	media\1423043337488.jpg	Asthma	Other	Antibiotic/Salbutamol/Aminophylline/others
1364	media\1423044687965.jpg	URTI	Cough/other							Antibiotic/others
1365	media\1423046041884.jpg	URTI	Other							Antibiotic/others
1366	media\1423047366064.jpg	Other	Cough/other							Antibiotic/others
1367	media\1423048502419.jpg	URTI	Other	media\1423048513959.jpg	Other	Cough/Other	media\1423048532591.jpg	Other	Cough/Other	Antibiotic/others
1368	media\1423055623871.jpg	URTI	Other							Antibiotic/others
1369	media\1423128896117.jpg	LRTI	Other							Antibiotic/others
1370	media\1423129143003.jpg	Other	Cough/other	media\1423129160534.jpg	Other	Other	media\1423129178502.jpg	LRTI	Cough	Antibiotic/others
1371	media\1423139808745.jpg	URTI	Other							Antibiotic/others
1372	media\1423140444977.jpg	Other	Cough							Antibiotic/others
1373	media\1423219043806.jpg	URTI	Cough/other							Antibiotic/others
1374	media\1423223589605.jpg	URTI	Cough							Antibiotic/others
1375	media\1423224950227.jpg	Asthma	Other	media\1423224996923.jpg	Asthma	Other	media\1423225007615.jpg	Asthma	Other	Antibiotic/Salbutamol/Steroid/Aminophylline
1376	media\1423225300358.jpg	URTI	Other	media\1423225347457.jpg	Other	Chest pain/Other	media\1423225395988.jpg	LRTI	Cough	Antibiotic/others
1377	media\1423227222257.jpg	URTI	Other							Antibiotic/others
1378	media\1423228624468.jpg	URTI	Cough/other							Antibiotic/others
1379	media\1423231494490.jpg	Other	Other							Others
1380	media\1423231771646.jpg	Other	Other							Antibiotic/others
1381	media\1423482022798.jpg	URTI	Cough/other							Antibiotic/others
1382	media\1423484043237.jpg	RTI	Cough/other							Antibiotic/others
1383	media\1423484258720.jpg	URTI	Other							Antibiotic/others
1384	media\1423487285136.jpg	URTI	Cough/other							Antibiotic/others
1385	media\1423498168955.jpg	URTI	Other							Antibiotic/others
1386	media\1423498228337.jpg	Other	Other	media\1423498245591.jpg	Other	Chest pain/Other				Antibiotic/others
1387	media\1423559010816.jpg	RTI	Other							Antibiotic/others
1388	media\1423562996176.jpg	Pneumonia	Other	media\1423563012340.jpg	Asthma/other	Breathlessness				Antibiotic/others
1389	media\1423647281045.jpg	RTI	Other							Antibiotic/others
1390	media\1423647580580.jpg	Other	Other							Others
1391	media\1423649465089.jpg	RTI	Cough							Antibiotic/others
1392	media\1423651669232.jpg	URTI	Other							Antibiotic/others
1393	media\1423653465309.jpg	URTI	Cough/other							Antibiotic/others
1394	media\1423654616033.jpg	RTI	Cough/other							Antibiotic/others
1395	media\1423655732079.jpg	Asthma	Other							Salbutamol/Steroid
1396	media\1423656672109.jpg	RTI	Cough							Antibiotic/others
1397	media\1423657775800.jpg	URTI	Cough/other							Antibiotic/others
1398	media\1423660886617.jpg	URTI	Cough/other							Antibiotic/others
1399	media\1423661905047.jpg	URTI	Cough							Antibiotic/others
1400	media\1423664385686.jpg	RTI	Cough							Antibiotic/others
1401	media\1423731625646.jpg	URTI	Cough/other							Antibiotic/others
1402	media\1423736961401.jpg	URTI	Cough/other							Antibiotic/others
1403	media\1423737081965.jpg	RTI	Cough							Antibiotic/others
1404	media\1423740836781.jpg	URTI	Other							Antibiotic/others
1405	media\1423742521919.jpg	Asthma	Other							Aminophylline
1406	media\1423822533239.jpg	URTI	Cough/other							Antibiotic/others
1407	media\1423822745002.jpg	URTI	Other							Antibiotic/others
1408	media\1423824810215.jpg	URTI	Cough/other							Antibiotic/others
1409	media\1423825107525.jpg	Asthma	Other	media\1423825132798.jpg	Asthma	Other	media\1423825172562.jpg	LRTI	Other	Antibiotic/Salbutamol/Aminophylline/others
1410	media\1423828542835.jpg	RTI	Cough/other							Antibiotic/others
1411	media\1423830096926.jpg	URTI	Other							Antibiotic/others
1412	media\1423830242562.jpg	Asthma	Other							Antibiotic/Salbutamol/others
1413	media\1423830881003.jpg	Asthma	Other							Antibiotic/Salbutamol/others
1414	media\1423831801064.jpg	Pneumonia	Cough/other	media\1423831833684.jpg	Other	Other				Antibiotic/others
1415	media\1423833249898.jpg	URTI	Cough/other							Antibiotic/others
1416	media\1423833864520.jpg	Other	Cough/Breathlessness	media\1423833886488.jpg	Pneumonia	Cough/Breathlessness	media\1423833921812.jpg	LRTI	Other	Antibiotic/others
1417	media\1423834794901.jpg	Other	Other							Antibiotic/others
1418	media\1424079640858.jpg	Other	Other							Others
1419	media\1424080225351.jpg	URTI	Cough/other							Antibiotic/others
1420	media\1424081779996.jpg	URTI	Cough/other							Antibiotic/others
1421	media\1424081825344.jpg	RTI	Cough/other							Antibiotic/others
1422	media\1424081976388.jpg	Asthma	Cough/other							Antibiotic/others
1423	media\1424084085750.jpg	RTI	Other							Antibiotic/others
1424	media\1424085551507.jpg	RTI	Cough/other							Antibiotic/others
1425	media\1424086771333.jpg	LRTI	Cough/other							Antibiotic/others
1426	media\1424169692838.jpg	Other	Other							Antibiotic/others
1427	media\1424170124025.jpg	URTI	Cough							Antibiotic/others
1428	media\1424170612875.jpg	URTI	Chest pain							Antibiotic/others
1429	media\1424171170288.jpg	URTI	Cough							Antibiotic/others
1430	media\1424173140693.jpg	URTI	Cough/other	media\1424173169881.jpg	Pneumonia	Other	media\1424173195131.jpg	Asthma	Cough/Breathlessness	Antibiotic/Salbutamol/others
1431	media\1424173367109.jpg	URTI	Cough							Antibiotic/others
1432	media\1424251467955.jpg	RTI	Cough/other							Antibiotic/others
1433	media\1424255737591.jpg	URTI	Other							Antibiotic/others
1434	media\1424256778631.jpg	Other	Other	media\1424256812653.jpg	URTI	Cough				Antibiotic/others
1435	media\1424257514131.jpg	Other	Other	media\1424257556401.jpg	Other	Other				Antibiotic/Salbutamol/others
1436	media\1424333830898.jpg	Other	Other	media\1424333847527.jpg	Other	Other	media\1424333863368.jpg	Other	Other	Others
1437	media\1424334049925.jpg	Other	Other	media\1424334062130.jpg	RTI	Other				Antibiotic/others
1438	media\1424340012652.jpg	URTI	Cough/other							Antibiotic/others
1439	media\1424340811189.jpg	RTI	Cough							Antibiotic/others
1440	media\1424347280532.jpg	LRTI	Other	media\1424347302139.jpg	Other	Other	media\1424347321818.jpg	LRTI	Cough	Antibiotic/others
1441	media\1424426631548.jpg	URTI	Chest pain							Antibiotic/others
1442	media\1424428847612.jpg	RTI	Other							Antibiotic/others
1443	media\1424430744220.jpg	Asthma	Other							Antibiotic/Salbutamol/others
1444	media\1424434623425.jpg	RTI	Cough							Antibiotic/others
1445	media\1424688648958.jpg	Pneumonia	Chest pain	media\1424688662694.jpg	Other	Other				Antibiotic/others
1446	media\1424689480466.jpg	RTI	Cough/other							Antibiotic/others
1447	media\1424769968116.jpg	URTI	Other							Antibiotic/others
1448	media\1424772151309.jpg	Asthma	Other	media\1424772175142.jpg	Asthma/URTI	Cough	media\1424772219630.jpg	Asthma	Other	Antibiotic/Salbutamol/Aminophylline/others
1449	media\1424774267616.jpg	URTI	Cough/other							Antibiotic/others
1450	media\1424774966617.jpg	Other	Other							Antibiotic/others
1451	media\1424777660286.jpg	URTI	Cough/other							Antibiotic/others
1452	media\1424777916780.jpg	Other	Other	media\1424777930291.jpg	Pneumonia	Cough	media\1424777945884.jpg	Other	Other	Antibiotic/others
1453	media\1424779265312.jpg	Other	Cough							Antibiotic/others
1454	media\1424780376534.jpg	RTI	Other							Antibiotic/others
1455	media\1424781002576.jpg	Asthma	Other							Antibiotic/Salbutamol/others
1456	media\1424781334258.jpg	Asthma	Other	media\1424781375642.jpg	Asthma	Cough				Antibiotic/Salbutamol/others
1457	media\1424857519200.jpg	Other	Cough							Others
1458	media\1424861199102.jpg	URTI	Other							Antibiotic/others
1459	media\1424862408458.jpg	Asthma	Other							Salbutamol/others
1460	media\1424866789396.jpg	RTI	Cough/other							Antibiotic/others
1461	media\1424867450879.jpg	Other	Other							Antibiotic/others
1462	media\1424868437215.jpg	URTI	Chest pain							Antibiotic/others
1463	media\1424868835709.jpg	URTI	Cough/other							Antibiotic/others
1464	media\1424869423789.jpg	Other	Other	media\1424869447306.jpg	Other	Cough				Antibiotic/others
1465	media\1424941010917.jpg	Pneumonia	Cough							Antibiotic/others
1466	media\1424945043255.jpg	Asthma	Other	media\1424945084425.jpg	Asthma	Other				Antibiotic/Aminophylline/others
1467	media\1424946333351.jpg	URTI	Cough/other							Antibiotic/others
1468	media\1424946661336.jpg	Asthma	Cough/other							Antibiotic/others
1469	media\1424946986257.jpg	Asthma	Cough	media\1424947167112.jpg	URTI/other	Cough				Antibiotic/Aminophylline/others
1470	media\1424948625839.jpg	RTI	Other							Antibiotic/others
1471	media\1424949947742.jpg	RTI	Cough/other							Antibiotic/others
1472	media\1424951710941.jpg	Asthma	Other							Antibiotic/Salbutamol/others
1473	media\1424957865953.jpg	TB	Other							Others
1474	media\1425032238316.jpg	URTI	Cough							Antibiotic/others
1475	media\1425033402298.jpg	RTI	Cough							Antibiotic/others
1476	media\1425035210778.jpg	RTI	Cough/other							Antibiotic/others
1477	media\1425036881517.jpg	Pneumonia	Cough							Antibiotic/others
1478	media\1425038788981.jpg	URTI	Cough/other							Antibiotic/others
1479	media\1425039551616.jpg	TB	Other							Others
1480	media\1425043269771.jpg	URTI	Cough/other							Antibiotic/others
1481	media\1425043495563.jpg	RTI	Cough/other							Antibiotic/others
1482	media\1425045734011.jpg	Pneumonia	Cough/other	media\1425045771851.jpg	Other	Other				Antibiotic/others
1483	media\1425047080247.jpg	RTI	Cough							Antibiotic/others
1484	media\1425047390883.jpg	RTI	Other							Antibiotic/others
1485	media\1425048768348.jpg	Other	Cough/other	media\1425048790282.jpg	Bronchitis	Other				Antibiotic/others
1486	media\1425287446572.jpg	RTI	Other							Antibiotic/others
1487	media\1425288112915.jpg	Other	Other							Others
1488	media\1425288489360.jpg	URTI	Other							Antibiotic/others
1489	media\1425291107244.jpg	URTI	Other							Antibiotic/others
1490	media\1425292232500.jpg	URTI	Other							Antibiotic/others
1491	media\1425293010163.jpg	Other	Other							Others
1492	media\1425293093541.jpg	URTI	Cough/other							Antibiotic
1493	media\1425295183458.jpg	Pneumonia	Other	media\1425295212599.jpg	URTI	Other				Antibiotic/others
1494	media\1425296785659.jpg	Asthma	Other	media\1425296821492.jpg	Asthma	Other				Antibiotic/Salbutamol/others
1495	media\1425372843500.jpg	Asthma	Other	media\1425372875394.jpg	Asthma	Other	media\1425372911896.jpg	Asthma	Other	Antibiotic/Salbutamol/Aminophylline/others
1496	media\1425373952676.jpg	Asthma	Other	media\1425374013907.jpg	Asthma	Other	media\1425374052982.jpg	LRTI	Other	Antibiotic/Salbutamol/others
1497	media\1425374039872.jpg	Asthma	Other							Antibiotic/Salbutamol/others
1498	media\1425376256316.jpg	RTI	Other							Antibiotic/others
1499	media\1425378316610.jpg	Other	Other							Others
1500	media\1425378334443.jpg	URTI	Other							Antibiotic/others
1501	media\1425378638587.jpg	URTI	Other	media\1425378672128.jpg	Pneumonia/others	Other	media\1425378717928.jpg	TB	Other	TB Drugs
1502	media\1425378962474.jpg	RTI	Other							Antibiotic/others
1503	media\1425382891345.jpg	LRTI	Other							Antibiotic/others
1504	media\1425382990809.jpg	LRTI	Cough/other							Antibiotic/others
1505	media\1425383017355.jpg	URTI	Other							Antibiotic/others
1506	media\1425383530433.jpg	RTI	Chest pain							Antibiotic/others
1507	media\1425384060756.jpg	URTI	Other							Antibiotic/others
1508	media\1425385600071.jpg	LRTI	Other							Antibiotic/others
1509	media\1425385855073.jpg	Other	Other							Salbutamol/others
1510	media\1425457453590.jpg	LRTI	Cough/Breathlessness							Antibiotic/others
1511	media\1425458418723.jpg	RTI	Other							Antibiotic/others
1512	media\1425458809777.jpg	Asthma	Other	media\1425458842137.jpg	Asthma/Bronchitis	Other	media\1425458879307.jpg	LRTI	Other	Antibiotic/others
1513	media\1425459086560.jpg	LRTI	Cough/other							Antibiotic/others
1514	media\1425459605244.jpg	LRTI	Other	media\1425459642809.jpg	Pneumonia	Other	media\1425459666379.jpg	LRTI	Other	Antibiotic/others
1515	media\1425460640064.jpg	URTI	Other							Antibiotic/others
1516	media\1425461818968.jpg	Bronchitis	Other	media\1425461844998.jpg	LRTI	Other				Antibiotic/others
1517	media\1425461925480.jpg	Other	Other							Antibiotic/others
1518	media\1425462371562.jpg	Other	Cough/other							Antibiotic/others
1519	media\1425462681270.jpg	RTI	Other							Antibiotic/others
1520	media\1425463133985.jpg	RTI	Other	media\1425463209582.jpg	RTI	Cough				Antibiotic/others
1521	media\1425465856874.jpg	Asthma	Other							Antibiotic/Salbutamol/others
1522	media\1425466109684.jpg	URTI	Cough							Antibiotic/others
1523	media\1425466388784.jpg	Pneumonia	Other	media\1425466423576.jpg	LRTI	Other				Antibiotic/others
1524	media\1425467031256.jpg	Other	Other							Antibiotic/others
1525	media\1425467407552.jpg	RTI	Cough/other							Antibiotic/others
1526	media\1425467779700.jpg	Asthma	Other	media\1425467828152.jpg	Asthma/Pneumonia	Other	media\1425468095043.jpg	LRTI	Other	Antibiotic/Salbutamol/Aminophylline/others
1527	media\1425470013148.jpg	URTI	Other							Antibiotic/others
1528	media\1425470239977.jpg	LRTI	Other							Antibiotic/others
1529	media\1425470840833.jpg	Other	Chest pain	media\1425470887865.jpg	Pneumonia	Other				Antibiotic/others
1530	media\1425472120659.jpg	Asthma	Other							Antibiotic/Salbutamol/others
1531	media\1425472608601.jpg	LRTI	Other							Antibiotic/others
1532	media\1425473532868.jpg	LRTI	Other							Antibiotic/others
1533	media\1425475966076.jpg	Pneumonia	Other							Antibiotic/others
1534	media\1425542992045.jpg	Pneumonia	Other							Antibiotic/others
1535	media\1425543636814.jpg	Pneumonia	Other	media\1425543653467.jpg	Pneumonia	Cough/Breathlessness				Antibiotic/others
1536	media\1425545942001.jpg	URTI	Other							Antibiotic/others
1537	media\1425547177035.jpg	URTI	Other							Antibiotic/others
1538	media\1425548951899.jpg	Asthma	Other							Antibiotic/Salbutamol/others
1539	media\1425549441752.jpg	Other	Other	media\1425549454047.jpg	Pneumonia	Other	media\1425549512503.jpg	TB	Other	Antibiotic/TB Drugs
1540	media\1425551943477.jpg	Pneumonia	Cough/other							Antibiotic/others
1541	media\1425552274010.jpg	URTI	Other							Antibiotic/others
1542	media\1425556383443.jpg	Pneumonia	Other							Antibiotic/others
1543	media\1425556857236.jpg	Bronchitis	Cough							Antibiotic/Salbutamol/others
1544	media\1425887297943.jpg	Other	Other							Antibiotic/others
1545	media\1425887740262.jpg	RTI	Other							Antibiotic/others
1546	media\1425887880382.jpg	RTI	Other							Antibiotic/others
1547	media\1425889311287.jpg	Other	Other							Antibiotic/others
1548	media\1425889911712.jpg	RTI	Other							Antibiotic/others
1549	media\1425890422473.jpg	Other	Other							Antibiotic/others
1550	media\1425891228756.jpg	Other	Other							Antibiotic/others
1551	media\1425891387887.jpg	LRTI	Cough/other	media\1425891439836.jpg	Other	Other				Antibiotic/others
1552	media\1425892549459.jpg	RTI	Other							Antibiotic/others
1553	media\1425893760170.jpg	Other	Other							Antibiotic/others
1554	media\1425894396531.jpg	Asthma	Other	media\1425894412350.jpg	Asthma	Other	media\1425894435813.jpg	Asthma	Other	Antibiotic/Salbutamol/others
1555	media\1425895676725.jpg	URTI	Other							Antibiotic/others
1556	media\1425896548394.jpg	URTI	Other							Antibiotic/others
1557	media\1425897984550.jpg	Other	Other							Antibiotic/others
1558	media\1425898729398.jpg	Other	Other							Antibiotic/others
1559	media\1425899251009.jpg	Pneumonia	Other							Antibiotic/others
1560	media\1425900847970.jpg	Pneumonia	Other	media\1425900868532.jpg	Pneumonia	Other				Antibiotic/others
1561	media\1425901187345.jpg	Pneumonia	Cough	media\1425901202377.jpg	RTI	Other	media\1425901218936.jpg	LRTI	Other	Antibiotic/others
1562	media\1425901299673.jpg	Asthma	Other	media\1425901316383.jpg	Asthma	Other				Antibiotic/Salbutamol
1563	media\1425901792885.jpg	RTI								Antibiotic/others
1564	media\1425902254039.jpg	Pneumonia	Other							Antibiotic/others
1565	media\1425905703732.jpg	Asthma	Other	media\1425905732221.jpg	Asthma	Other	media\1425905756466.jpg	Asthma	Other	Antibiotic/Salbutamol/others
1566	media\1425906462945.jpg	LRTI	Other	media\1425906491459.jpg	LRTI	Other				Antibiotic/others
1567	media\1425911475037.jpg	Asthma	Other							Antibiotic/Aminophylline
1568	media\1425974996338.jpg	URTI	Cough/other							Antibiotic/others
1569	media\1425976864245.jpg	LRTI	Other	media\1425977121606.jpg	Other	Other	media\1425977142600.jpg	Other	Other	Antibiotic/others
1570	media\1425976967114.jpg	LRTI	Other							Antibiotic/others
1571	media\1425977175430.jpg	URTI	Other							Antibiotic/others
1572	media\1425977416442.jpg	LRTI	Other							Antibiotic/others
1573	media\1425977575488.jpg	LRTI	Other							Antibiotic/others
1574	media\1425978191109.jpg	LRTI	Other							Antibiotic/others
1575	media\1425978942190.jpg	RTI	Other							Antibiotic/others
1576	media\1425979167503.jpg	Other	Other	media\1425979183902.jpg	Other	Other				Antibiotic/others
1577	media\1425979188160.jpg	LRTI	Other							Antibiotic/others
1578	media\1425979233699.jpg	LRTI	Cough/Breathlessness							Antibiotic/others
1579	media\1425979935575.jpg	RTI	Other							Antibiotic/others
1580	media\1425980617444.jpg	Other	Other	media\1425980634775.jpg	Other	Other				Antibiotic/others
1581	media\1425981856263.jpg	Pneumonia	Other	media\1425981873265.jpg	Other	Other				Antibiotic/others
1582	media\1425983327294.jpg	URTI	Other							Antibiotic/others
1583	media\1425983735851.jpg	URTI	Other							Antibiotic/others
1584	media\1425984399357.jpg	LRTI	Other							Antibiotic/others
1585	media\1425984860442.jpg	Pneumonia	Other							Antibiotic/others
1586	media\1425985133756.jpg	Other	Other							Others
1587	media\1425985747392.jpg	URTI	Cough							Antibiotic/others
1588	media\1425986950065.jpg	Pneumonia	Cough/other							Antibiotic/others
1589	media\1425987596110.jpg	RTI	Other							Antibiotic/others
1590	media\1425988435597.jpg	Pneumonia	Other	media\1425988466590.jpg	Pneumonia	Cough	media\1425988485461.jpg	Other	Other	Antibiotic/others
1591	media\1425989112383.jpg	Pneumonia	Other							Antibiotic/others
1592	media\1426059838910.jpg	RTI	Other							Antibiotic/others
1593	media\1426061385053.jpg	RTI	Other							Antibiotic/others
1594	media\1426062997603.jpg	LRTI	Other							Antibiotic/others
1595	media\1426068438692.jpg	LRTI	Other							Antibiotic/others
1596	media\1426068857145.jpg	RTI	Other							Antibiotic/others
1597	media\1426070266254.jpg	Pneumonia	Cough/other	media\1426070277752.jpg	Pneumonia	Other	media\1426070348810.jpg	LRTI	Cough	Antibiotic/others
1598	media\1426071283178.jpg	LRTI	Other							Antibiotic/others
1599	media\1426073535091.jpg	LRTI	Cough/other							Antibiotic/others
1600	media\1426146859707.jpg	RTI	Other							Antibiotic/others
1601	media\1426147575855.jpg	Pneumonia	Chest pain							Antibiotic/others
1602	media\1426153331181.jpg	RTI	Other							Antibiotic/others
1603	media\1426157182379.jpg	URTI	Cough/other							Antibiotic/others
1604	media\1426157634409.jpg	RTI	Other							Antibiotic/others
1605	media\1426236439808.jpg	RTI	Cough/other							Antibiotic/others
1606	media\1426238918869.jpg	Pneumonia	Other							Antibiotic/others
1607	media\1426242337271.jpg	LRTI	Other							Antibiotic/others
1608	media\1426242480468.jpg	Other	Other							Antibiotic/others
1609	media\1426242719844.jpg	Other	Cough/Breathlessness	media\1426242835598.jpg	Bronchitis	Other	media\1426242802098.jpg	LRTI	Other	Antibiotic/Salbutamol/others
1610	media\1426245014157.jpg	Pneumonia	Cough/other	media\1426244994499.jpg	RTI	Cough	media\1426244964078.jpg	Asthma	Other	Antibiotic/Salbutamol/others
1611	media\1426245620805.jpg	Pneumonia	Chest pain	media\1426245654508.jpg	Pneumonia/others	Other				Antibiotic/others
1612	media\1426245901996.jpg	Other	Other							Antibiotic/others
1613	media\1426247179615.jpg	LRTI	Cough	media\1426247239805.jpg	RTI	Other				Antibiotic/Salbutamol/others
1614	media\1426249107039.jpg	Other	Other							Antibiotic/others
1615	media\1426250787533.jpg	RTI	Other							Antibiotic/others
1616	media\1426252021706.jpg	RTI	Other							Antibiotic/others
1617	media\1426252262510.jpg	RTI	Cough							Antibiotic/others
1618	media\1426252949770.jpg	Pneumonia	Other							Antibiotic/others
1619	media\1426498141575.jpg	RTI	Cough/other							Antibiotic/others
1620	media\1426498446404.jpg	Other	Other							Antibiotic/others
1621	media\1426499391289.jpg	RTI	Other							Antibiotic/others
1622	media\1426499552680.jpg	URTI	Cough	media\1426499581893.jpg	Other	Other				Antibiotic/others
1623	media\1426503182179.jpg	Pneumonia	Chest pain							Antibiotic/others
1624	media\1426504098807.jpg	RTI	Cough/other							Antibiotic/others
1625	media\1426504432399.jpg	RTI	Other							Antibiotic/others
1626	media\1426505558159.jpg	Other	Cough/other	media\1426505470138.jpg	RTI	Other	media\1426505484838.jpg	Asthma	Other	Antibiotic/Salbutamol/Steroids/others
1627	media\1426506521779.jpg	URTI	Cough/other							Antibiotic/others
1628	media\1426506662701.jpg	Pneumonia	Cough/other							Antibiotic/others
1629	media\1426507349445.jpg	URTI	Other							Antibiotic/others
1630	media\1426508465106.jpg	RTI	Cough/other	media\1426508493924.jpg	Pneumonia	Cough				Antibiotic/others
1631	media\1426509307302.jpg	Pneumonia	Cough/Breathlessness							Antibiotic/others
1632	media\1426511617520.jpg	RTI	Other							Antibiotic/others
1633	media\1426512223061.jpg	Pneumonia	Other							Antibiotic/others
1634	media\1426583039281.jpg	RTI	Other							Antibiotic/others
1635	media\1426583479614.jpg	RTI	Cough							Antibiotic/others
1636	media\1426583886449.jpg	Other	Other	media\1426583900499.jpg	RTI	Other				Antibiotic/others
1637	media\1426585742169.jpg	Asthma	Other	media\1426585794033.jpg	Asthma	Other	media\1426585662357.jpg	Asthma	Other	Antibiotic/Salbutamol/others
1638	media\1426587488932.jpg	Other	Other							Antibiotic/others
1639	media\1426588273293.jpg	RTI	Other							Antibiotic
1640	media\1426589200066.jpg	RTI		media\1426589226730.jpg	RTI	Cough/Other	media\1426589287196.jpg	LRTI	Cough/Other	Antibiotic/others
1641	media\1426589770336.jpg	Pneumonia	Cough/other	media\1426589783167.jpg	Other	Other				Antibiotic/others
1642	media\1426591373319.jpg	Asthma	Other							Antibiotic/Salbutamol/others
1643	media\1426591765613.jpg	RTI	Cough/other	media\1426591795900.jpg	Pneumonia	Chest pain/Other				Antibiotic/others
1644	media\1426593427450.jpg	Asthma	Other	media\1426593438947.jpg	Asthma	Other				Salbutamol/Aminophylline/Steroids
1645	media\1426600321721.jpg	RTI	Other	media\1426600353404.jpg	RTI	Other	media\1426600382183.jpg	LRTI	Other	Antibiotic/others
1646	media\1426600474307.jpg	Other	Other							Antibiotic/others
1647	media\1426601701872.jpg	RTI	Cough/other							Antibiotic/others
1648	media\1426665517541.jpg	URTI	Other							Antibiotic/others
1649	media\1426667489465.jpg	Asthma	Wheezing/other							Antibiotic/Salbutamol/others
1650	media\1426667992474.jpg	URTI	Other							Antibiotic/others
1651	media\1426668548809.jpg	URTI	Other	media\1426668564805.jpg	URTI	Other				Antibiotic/others
1652	media\1426669594682.jpg	Other	Other							Others
1653	media\1426669927169.jpg	Other	Other	media\1426669941825.jpg	URTI	Other	media\1426669957304.jpg	LRTI	Other	Antibiotic/others
1654	media\1426670747135.jpg	Bronchitis	Cough/other							Antibiotic/others
1655	media\1426671729025.jpg	Pneumonia	Other	media\1426671765406.jpg	URTI	Other	media\1426671789359.jpg	LRTI	Other	Antibiotic/others
1656	media\1426672785421.jpg	URTI	Cough/other							Antibiotic/others
1657	media\1426674794442.jpg	URTI	Chest pain							Antibiotic/others
1658	media\1426676259480.jpg	Other	Cough							Antibiotic/others
1659	media\1426676620538.jpg	URTI	Other	media\1426676667685.jpg	URTI	Other				Antibiotic/others
1660	media\1426679247371.jpg	Asthma	Other							Antibiotic/Salbutamol/others
1661	media\1426681578203.jpg	URTI	Other							Antibiotic/others
1662	media\1426752692799.jpg	URTI	Cough/other							Antibiotic/others
1663	media\1426753006271.jpg	URTI	Cough/other							Antibiotic/others
1664	media\1426753705800.jpg	URTI	Cough/other							Antibiotic/others
1665	media\1426753881607.jpg	Asthma	Other							Aminophylline/Steroids
1666	media\1426755500637.jpg	Pneumonia	Cough/other							Antibiotic/others
1667	media\1426756299915.jpg	Asthma	Cough/other	media\1426756315665.jpg	Asthma	Chest pain	media\1426756365411.jpg	Asthma	Cough	Salbutamol/Aminophylline/others
1668	media\1426757868626.jpg	Asthma	Cough							Antibiotic/Salbutamol/others
1669	media\1426758278233.jpg	URTI	Cough/other							Antibiotic/others
1670	media\1426760078176.jpg	URTI	Cough/other							Antibiotic/others
1671	media\1426762403748.jpg	Asthma	Other							Antibiotic/Salbutamol/others
1672	media\1426764300050.jpg	Other	Cough	media\1426764351055.jpg	URTI	Other				Antibiotic/Salbutamol/others
1673	media\1426764488416.jpg	URTI	Cough/other							Antibiotic/others
1674	media\1426839997575.jpg	URTI	Other	media\1426840032194.jpg	URTI	Cough/Other				Antibiotic/Salbutamol/others
1675	media\1426844280172.jpg	URTI	Cough/other							Antibiotic/others
1676	media\1426845609033.jpg	Asthma	Other	media\1426845675653.jpg	Other	Other				Antibiotic/Salbutamol/others
1677	media\1426846685435.jpg	URTI	Other							Antibiotic/others
1678	media\1426848688581.jpg	Other	Other	media\1426848712521.jpg	Asthma/Others	Other				Antibiotic/Salbutamol/others
1679	media\1426852328974.jpg	Other	Other							Antibiotic/others
1680	media\1426852421107.jpg	Asthma	Other	media\1426852454470.jpg	Asthma/Others	Cough				Antibiotic/Salbutamol/others
1681	media\1426856029816.jpg	Bronchitis	Other							Antibiotic/others
1682	media\1426856092305.jpg	Asthma	Other							Antibiotic/Salbutamol/others
1683	media\1427098467246.jpg	Asthma	Other							Antibiotic/Salbutamol/others
1684	media\1427098475861.jpg	Other	Other							Antibiotic/others
1685	media\1427106388960.jpg	RTI	Cough							Antibiotic/others
1686	media\1427113547258.jpg	RTI	Other	media\1427113578463.jpg	RTI	Cough/Other				Antibiotic/others
1687	media\1427370605827.jpg	URTI	Other							Antibiotic/others
1688	media\1427372189159.jpg	LRTI	Other	Other	Other					Antibiotic/others
1689	media\1427372618388.jpg	Other	Other	media\1427372649099.jpg	RTI	URTI				Antibiotic/others
1690	media\1427373126070.jpg	URTI	Other							Antibiotic/others
1691	media\1427373232578.jpg	URTI	Other							Antibiotic/others
1692	media\1427373700471.jpg	URTI	Other							Antibiotc
1693	media\1427456277876.jpg	Pneumonia	Other							Antibiotic/others
1694	media\1427462570904.jpg	Pneumonia		media\1427462586722.jpg	URTI/other		media\1427462619501.jpg	Other	Other	Antibiotics/others
1695	media\1427463080952.jpg	Pneumonia	Cough/other							Antibiotic/others
1696	media\1427536831204.jpg	URTI	Cough/other	media\1427537012806.jpg	Pneumonia	Other	media\1427537125290.jpg	LRTI	Other	Antibiotic/others
1697	media\1427538441663.jpg	URTI	Chest pain	media\1427538476624.jpg	URTI	Other	media\1427538499268.jpg	LRTI	Other	Antibiotic/others
1698	media\1427542497546.jpg	URTI	Other							Antibiotic/others
1699	media\1427547197495.jpg	URTI	Other							Antibiotic/others
1700	media\1427708806999.jpg	URTI	Other	media\1427708824629.jpg	Other	Other				Antibiotic/others
1701	media\1427709748124.jpg	URTI	Other							Antibiotic/others
1702	media\1427709989980.jpg	URTI	Other							Antibiotic/others
1703	media\1427711676865.jpg	Pneumonia	Other							Antibiotic/others
1704	media\1427711804871.jpg	URTI	Other							Antibiotic/others
1705	media\1427712473481.jpg	URTI	Other							Antibiotic/others
1706	media\1427715554720.jpg	URTI	Other	media\1427715581318.jpg	URTI	Other				Antibiotic/others
1707	media\1427716289301.jpg	Pneumonia	Other							Antibiotic/others
1708	media\1427716708998.jpg	Other	Other							Antibiotic/others
1709	media\1427717515224.jpg	URTI	Other							Antibiotic/others
1710	media\1427718496709.jpg	Pneumonia	Other							Antibiotic/others
1711	media\1427718789676.jpg	URTI	Other							Antibiotic/others
1712	media\1427719442593.jpg	URTI	Other							Antibiotic/others
1713	media\1427720100907.jpg	URTI	Cough							Antibiotic/others
1714	media\1427720830148.jpg	Pneumonia	Other							Antibiotic/others
1715	media\1427723384552.jpg	Other	Other	media\1427723399373.jpg	Other	Other				Antibiotic/others
1716	media\1427796722420.jpg	URTI	Other							Antibiotic/others
1717	media\1427798072683.jpg	URTI	Cough							Antibiotic/others
1718	media\1427800870798.jpg	URTI	Other							Antibiotic/others
1719	media\1427801123262.jpg	URTI	Other							Antibiotic/others
1720	media\1427801916817.jpg	URTI	Other							Antibiotic/others
1721	media\1427802389945.jpg	URTI	Other							Antibiotic/others
1722	media\1427802447719.jpg	URTI	Other							Antibiotic/others
1723	media\1427807028592.jpg	URTI	Other							Antibiotic/others
1724	media\1427807846960.jpg	URTI	Cough/other	media\1427807866735.jpg	URTI	Chest pain				Antibiotic/others
1725	media\1427967506204.jpg	Other	Other							Antibiotic/others
1726	media\1427967933224.jpg	URTI	Other							Antibiotic/others
1727	media\1427975813111.jpg	Other	Other	media\1427975842750.jpg	Other	Other	media\1427975873673.jpg	LRTI	Other	Antibiotic/others
1728	media\1427977078734.jpg	Other	Cough							Antibiotic/others
1729
1730
1731
1732
1733
1734
1735
1736
1737
1738
1739
1740
1741
1742
1743
1744
1745
1746
1747
1748
1749
1750
1751
1752
1753
1754
1755
1756
1757
1758
1759
1760
1761
1762
1763
1764
1765
1766
1767
1768
1769
1770
1771
1772
1773
1774
1775
1776
1777
1778
1779
1780
1781
1782
1783
1784
1785
1786
1787
1788
1789
1790
1791
1792
1793
1794
1795
1796
1797
1798
1799
1800
1801
1802
1803
1804
1805
1806
1807
1808
1809
1810
1811
1812
1813
1814
1815
1816
1817
1818
1819
1820
1821
1822
1823
1824
1825
1826
1827
1828
1829
1830
1831
1832
1833
1834
1835
1836
1837
1838
1839
1840
1841
1842
1843
1844
1845
1846
1847
1848
1849
1850
1851
1852
1853
1854
1855
1856
1857
1858
1859
1860
1861
1862
1863
1864
1865
1866
1867
1868
1869
1870
1871
1872
1873
1874
1875
1876
1877
1878
1879
1880
1881
1882
1883
1884
1885
1886
1887
1888
1889
1890
1891
1892
1893
1894
1895
1896
1897
1898
1899
1900
1901
1902
1903
1904
1905
1906
1907
1908
1909
1910
1911
1912
1913
1914
1915
1916
1917
1918
1919
1920
1921
1922
1923
1924
1925
1926
1927
1928
1929
1930
1931
1932
1933
1934
1935
1936
1937
1938
1939
1940
1941
1942
1943
1944
1945
1946
1947
1948
1949
1950
1951
1952
1953
1954
1955
1956
1957
1958
1959
1960
1961
1962
1963
1964
1965
1966
1967
1968
1969
1970
1971
1972
1973
1974
1975
1976
1977
1978
1979
1980
1981
1982
1983
1984
1985
1986
1987
1988
1989
1990
1991
1992
1993
1994
1995
1996
1997
1998
1999
[truncated: 13,801 more rows]
